# Supplementary material for: Does augmentation increase the pull-out force of symphyseal screws? A biomechanical cadaver study
Source: Eur J Trauma Emerg Surg. 2022 Apr 1;48(5):4215–21. doi: 10.1007/s00068-022-01963-6 (PMC9532288; doi:10.1007/s00068-022-01963-6)
Supplement: Supplementary file 1 — Supplementary file1 (XLSX 44025 KB) [file 68_2022_1963_MOESM1_ESM.xlsx]

## Sheet: Overview
Specimen Nr.	uncemented	primary cemented	secondary cemented
1	Data sheet 1	Data sheet 13	Data sheet 25
2	Data sheet 2	Data sheet 14	Data sheet 26
3	Data sheet 3	Data sheet 15	Data sheet 27
4	Data sheet 4	Data sheet 16	Data sheet 28
5	Data sheet 5	Data sheet 17	Data sheet 29
6	Data sheet 6	Data sheet 18	Data sheet 30
7	Data sheet 7	Data sheet 19	Data sheet 31
8	Data sheet 8	Data sheet 20	Data sheet 32
9	Data sheet 9	Data sheet 21	Data sheet 33
10	Data sheet 10	Data sheet 22	Data sheet 34
11	Data sheet 11	Data sheet 23	Data sheet 35
12	Data sheet 12	Data sheet 24	Data sheet 36
Specimen Nr.	uncemented pull-out force (N)	primary cemented pull-out force (N)	secondary cemented pull-out force (N)
1	199.585	251.136	814.061
2	78.7953	1294.48	290.727
3	133.179	1305.81	504.126
4	226.18	641.187	1146.43
5	275.805	720.843	1105.71
6	632.8	2346.3	1167.93
7	190.559	918.976	1388.06
8	264.183	1060.83	980.294
9	300.361	1778.83	1408.58
10	229.988	507.634	1761.97
11	579.409	1581.87	1714.31
12	583.191	1533.09	764.359

## Sheet: Data sheet 1
Gesamtzeit (s)	Verstrichene Zykluszeit (s)	Gesamtzyklen	Verstrichene Zyklen	Schritt	Gesamtzyklenzahl(E10BMTL8633 (Linear) Wellenform)	Gesamtzyklenzahl(E10BMTL8633 (Rotary) Wellenform)	Position des Aktuators(E10BMTL8633 (Linear):Position) (mm)	Last(E10BMTL8633 (Linear):Kraft) (kN)	Verschiebung(E10BMTL8633 (Linear):Digitale Position) (mm)	Umdrehung(E10BMTL8633 (Rotary):Umdrehung) (deg)	Drehmoment(E10BMTL8633 (Rotary):Drehmoment) (N·m)	Verschiebung (Rotation)(E10BMTL8633 (Rotary):Digitale Umdrehung) (deg)	Verschiebung(E10BMTL8633 (Linear):Position) (mm)	Dehnung(E10BMTL8633 (Linear):Position) (%)	Spannung(E10BMTL8633 (Linear):Kraft) (MPa)	Dehnung(E10BMTL8633 (Linear):Digitale Position) (%)	Verschiebung (Rotation)(E10BMTL8633 (Rotary):Umdrehung) (deg)	Scherdehnung(E10BMTL8633 (Rotary):Umdrehung) (rad)	Scherspannung(E10BMTL8633 (Rotary):Drehmoment) (MPa)	Scherdehnung(E10BMTL8633 (Rotary):Digitale Umdrehung) (rad)
0.001	0	1	1	1	0	0	-3.10633	0.00398776	5.58794e-05	8.59063	-0.157891	17.2035	-3.10633	-31.0633	3.98776	0.000558794	8.59063	0.149935	-157.891	0.300257						0.199585
0.002	0.001	1	1	1	0	0	-3.10629	0.00415587	9.18098e-05	8.59015	-0.147909	17.203	-3.10629	-31.0629	4.15587	0.000918098	8.59015	0.149926	-147.909	0.300249
0.012	0.011	1	1	1	0	0	-3.10634	0.00330337	4.33624e-05	8.59272	-0.148994	17.2056	-3.10634	-31.0634	3.30337	0.000433624	8.59272	0.149971	-148.994	0.300294
0.014	0.013	1	1	1	0	0	-3.10631	0.00356754	7.6443e-05	8.59384	-0.166911	17.2067	-3.10631	-31.0631	3.56754	0.00076443	8.59384	0.149991	-166.911	0.300313
0.029	0.028	1	1	1	0	0	-3.10626	0.00393324	0.000121146	8.59669	-0.171318	17.2095	-3.10626	-31.0626	3.93324	0.00121146	8.59669	0.150041	-171.318	0.300363
0.04	0.039	1	1	1	0	0	-3.10619	0.00414613	0.000196025	8.6	-0.162828	17.2128	-3.10619	-31.0619	4.14613	0.00196025	8.6	0.150098	-162.828	0.300421
0.05	0.049	1	1	1	0	0	-3.10619	0.00383765	0.00018876	8.59753	-0.15309	17.2104	-3.10619	-31.0619	3.83765	0.0018876	8.59753	0.150055	-153.09	0.300378
0.061	0.06	1	1	1	0	0	-3.10613	0.00393418	0.000255089	8.59629	-0.157219	17.2091	-3.10613	-31.0613	3.93418	0.00255089	8.59629	0.150034	-157.219	0.300356
0.071	0.07	1	1	1	0	0	-3.10603	0.00413889	0.000351984	8.59543	-0.154898	17.2083	-3.10603	-31.0603	4.13889	0.00351984	8.59543	0.150019	-154.898	0.300341
0.082	0.081	1	1	1	0	0	-3.10599	0.00384124	0.000393223	8.60316	-0.155963	17.216	-3.10599	-31.0599	3.84124	0.00393223	8.60316	0.150153	-155.963	0.300476
0.093	0.092	1	1	1	0	0	-3.10589	0.00413283	0.000494365	8.59569	-0.157978	17.2085	-3.10589	-31.0589	4.13283	0.00494365	8.59569	0.150023	-157.978	0.300345
0.103	0.102	1	1	1	0	0	-3.10576	0.0039637	0.000626184	8.59797	-0.16576	17.2108	-3.10576	-31.0576	3.9637	0.00626184	8.59797	0.150063	-165.76	0.300385
0.114	0.113	1	1	1	0	0	-3.10558	0.00407699	0.00080226	8.59829	-0.173927	17.2111	-3.10558	-31.0558	4.07699	0.0080226	8.59829	0.150068	-173.927	0.300391
0.125	0.124	1	1	1	0	0	-3.10498	0.00460499	0.0014062	8.59938	-0.172628	17.2122	-3.10498	-31.0498	4.60499	0.014062	8.59938	0.150088	-172.628	0.30041
0.135	0.134	1	1	1	0	0	-3.10412	0.00471442	0.00226161	8.60015	-0.165826	17.213	-3.10412	-31.0412	4.71442	0.0226161	8.60015	0.150101	-165.826	0.300423
0.146	0.145	1	1	1	0	0	-3.10312	0.00512297	0.00326073	8.60006	-0.159309	17.2129	-3.10312	-31.0312	5.12297	0.0326073	8.60006	0.150099	-159.309	0.300422
0.156	0.155	1	1	1	0	0	-3.10108	0.00538528	0.00530172	8.59765	-0.164474	17.2105	-3.10108	-31.0108	5.38528	0.0530172	8.59765	0.150057	-164.474	0.30038
0.166	0.165	1	1	1	0	0	-3.09899	0.0052794	0.00739597	8.59912	-0.158146	17.212	-3.09899	-30.9899	5.2794	0.0739597	8.59912	0.150083	-158.146	0.300405
0.177	0.176	1	1	1	0	0	-3.09617	0.0055937	0.010215	8.60063	-0.151106	17.2135	-3.09617	-30.9617	5.5937	0.10215	8.60063	0.150109	-151.106	0.300432
0.179	0.178	1	1	1	0	0	-3.09565	0.00568355	0.0107287	8.60398	-0.165666	17.2168	-3.09565	-30.9565	5.68355	0.107287	8.60398	0.150168	-165.666	0.30049
0.189	0.188	1	1	1	0	0	-3.09261	0.00617222	0.0137682	8.60014	-0.151497	17.213	-3.09261	-30.9261	6.17222	0.137682	8.60014	0.150101	-151.497	0.300423
0.199	0.198	1	1	1	0	0	-3.0899	0.00594562	0.016479	8.60116	-0.151555	17.214	-3.0899	-30.899	5.94562	0.16479	8.60116	0.150119	-151.555	0.300441
0.21	0.209	1	1	1	0	0	-3.08651	0.00636831	0.0198768	8.60064	-0.1502	17.2135	-3.08651	-30.8651	6.36831	0.198768	8.60064	0.150109	-150.2	0.300432
0.22	0.219	1	1	1	0	0	-3.08337	0.00654744	0.0230098	8.60161	-0.144692	17.2144	-3.08337	-30.8337	6.54744	0.230098	8.60161	0.150126	-144.692	0.300449
0.23	0.229	1	1	1	0	0	-3.08022	0.00649124	0.0261668	8.59732	-0.163682	17.2102	-3.08022	-30.8022	6.49124	0.261668	8.59732	0.150052	-163.682	0.300374
0.241	0.24	1	1	1	0	0	-3.07692	0.00691196	0.0294584	8.59807	-0.162076	17.2109	-3.07692	-30.7692	6.91196	0.294584	8.59807	0.150065	-162.076	0.300387
0.251	0.25	1	1	1	0	0	-3.07356	0.00761994	0.0328245	8.59875	-0.162625	17.2116	-3.07356	-30.7356	7.61994	0.328245	8.59875	0.150076	-162.625	0.300399
0.261	0.26	1	1	1	0	0	-3.07121	0.00700075	0.0351699	8.59689	-0.16496	17.2097	-3.07121	-30.7121	7.00075	0.351699	8.59689	0.150044	-164.96	0.300366
0.271	0.27	1	1	1	0	0	-3.0682	0.00732056	0.0381822	8.6017	-0.143163	17.2145	-3.0682	-30.682	7.32056	0.381822	8.6017	0.150128	-143.163	0.30045
0.281	0.28	1	1	1	0	0	-3.06493	0.00745597	0.0414497	8.59822	-0.154395	17.2111	-3.06493	-30.6493	7.45597	0.414497	8.59822	0.150067	-154.395	0.30039
0.292	0.291	1	1	1	0	0	-3.06099	0.00739834	0.045389	8.60195	-0.14916	17.2148	-3.06099	-30.6099	7.39834	0.45389	8.60195	0.150132	-149.16	0.300455
0.302	0.301	1	1	1	0	0	-3.0584	0.00772636	0.0479797	8.60002	-0.145126	17.2129	-3.0584	-30.584	7.72636	0.479797	8.60002	0.150099	-145.126	0.300421
0.312	0.311	1	1	1	0	0	-3.05543	0.00802686	0.0509529	8.6014	-0.176585	17.2142	-3.05543	-30.5543	8.02686	0.509529	8.6014	0.150123	-176.585	0.300445
0.322	0.321	1	1	1	0	0	-3.05305	0.00764566	0.0533364	8.59886	-0.155303	17.2117	-3.05305	-30.5305	7.64566	0.533364	8.59886	0.150078	-155.303	0.300401
0.332	0.331	1	1	1	0	0	-3.05012	0.00764472	0.0562593	8.59687	-0.162679	17.2097	-3.05012	-30.5012	7.64472	0.562593	8.59687	0.150044	-162.679	0.300366
0.342	0.341	1	1	1	0	0	-3.04767	0.00797352	0.0587125	8.59781	-0.13824	17.2107	-3.04767	-30.4767	7.97352	0.587125	8.59781	0.15006	-138.24	0.300383
0.353	0.352	1	1	1	0	0	-3.04391	0.00773641	0.0624715	8.60087	-0.136202	17.2137	-3.04391	-30.4391	7.73641	0.624715	8.60087	0.150114	-136.202	0.300436
0.363	0.362	1	1	1	0	0	-3.04137	0.00774138	0.0650098	8.60189	-0.14888	17.2147	-3.04137	-30.4137	7.74138	0.650098	8.60189	0.150131	-148.88	0.300454
0.377	0.376	1	1	1	0	0	-3.03759	0.00808689	0.0687893	8.59866	-0.144905	17.2115	-3.03759	-30.3759	8.08689	0.687893	8.59866	0.150075	-144.905	0.300397
0.387	0.386	1	1	1	0	0	-3.03454	0.00798672	0.0718405	8.59758	-0.15449	17.2104	-3.03454	-30.3454	7.98672	0.718405	8.59758	0.150056	-154.49	0.300379
0.397	0.396	1	1	1	0	0	-3.03153	0.00809805	0.0748503	8.6025	-0.171209	17.2153	-3.03153	-30.3153	8.09805	0.748503	8.6025	0.150142	-171.209	0.300464
0.407	0.406	1	1	1	0	0	-3.02881	0.00837905	0.077576	8.60228	-0.155945	17.2151	-3.02881	-30.2881	8.37905	0.77576	8.60228	0.150138	-155.945	0.30046
0.418	0.417	1	1	1	0	0	-3.02588	0.00814707	0.0805059	8.59767	-0.158781	17.2105	-3.02588	-30.2588	8.14707	0.805059	8.59767	0.150058	-158.781	0.30038
0.428	0.427	1	1	1	0	0	-3.02384	0.00844282	0.0825386	8.59896	-0.153273	17.2118	-3.02384	-30.2384	8.44282	0.825386	8.59896	0.15008	-153.273	0.300403
0.438	0.437	1	1	1	0	0	-3.0221	0.00873145	0.0842813	8.59564	-0.145908	17.2085	-3.0221	-30.221	8.73145	0.842813	8.59564	0.150022	-145.908	0.300345
0.448	0.447	1	1	1	0	0	-3.0196	0.00860009	0.0867848	8.59941	-0.15279	17.2123	-3.0196	-30.196	8.60009	0.867848	8.59941	0.150088	-152.79	0.30041
0.458	0.457	1	1	1	0	0	-3.01671	0.0090793	0.0896749	8.60132	-0.15132	17.2142	-3.01671	-30.1671	9.0793	0.896749	8.60132	0.150121	-151.32	0.300444
0.468	0.467	1	1	1	0	0	-3.01426	0.00935167	0.0921269	8.60239	-0.154199	17.2152	-3.01426	-30.1426	9.35167	0.921269	8.60239	0.15014	-154.199	0.300462
0.478	0.477	1	1	1	0	0	-3.01178	0.00900899	0.0946042	8.59845	-0.148385	17.2113	-3.01178	-30.1178	9.00899	0.946042	8.59845	0.150071	-148.385	0.300394
0.488	0.487	1	1	1	0	0	-3.00941	0.00950865	0.0969697	8.59794	-0.141748	17.2108	-3.00941	-30.0941	9.50865	0.969697	8.59794	0.150062	-141.748	0.300385
0.498	0.497	1	1	1	0	0	-3.00718	0.00961011	0.0992049	8.596	-0.137884	17.2088	-3.00718	-30.0718	9.61011	0.992049	8.596	0.150028	-137.884	0.300351
0.511	0.51	1	1	1	0	0	-3.0037	0.00962699	0.102683	8.59997	-0.153399	17.2128	-3.0037	-30.037	9.62699	1.02683	8.59997	0.150098	-153.399	0.30042
0.521	0.52	1	1	1	0	0	-3.00231	0.00986713	0.104068	8.59647	-0.16821	17.2093	-3.00231	-30.0231	9.86713	1.04068	8.59647	0.150037	-168.21	0.300359
0.531	0.53	1	1	1	0	0	-3.00139	0.0101828	0.104993	8.59719	-0.13839	17.21	-3.00139	-30.0139	10.1828	1.04993	8.59719	0.150049	-138.39	0.300372
0.541	0.54	1	1	1	0	0	-3.00024	0.0097791	0.106139	8.59756	-0.140086	17.2104	-3.00024	-30.0024	9.7791	1.06139	8.59756	0.150056	-140.086	0.300378
0.551	0.55	1	1	1	0	0	-2.99863	0.010068	0.107748	8.59749	-0.128466	17.2103	-2.99863	-29.9863	10.068	1.07748	8.59749	0.150055	-128.466	0.300377
0.561	0.56	1	1	1	0	0	-2.99806	0.0103072	0.108325	8.59564	-0.163906	17.2085	-2.99806	-29.9806	10.3072	1.08325	8.59564	0.150022	-163.906	0.300345
0.562	0.561	1	1	1	0	0	-2.99798	0.0103599	0.108401	8.59558	-0.116106	17.2084	-2.99798	-29.9798	10.3599	1.08401	8.59558	0.150021	-116.106	0.300344
0.572	0.571	1	1	1	0	0	-2.99727	0.00984661	0.109112	8.59886	-0.155125	17.2117	-2.99727	-29.9727	9.84661	1.09112	8.59886	0.150078	-155.125	0.300401
0.578	0.577	1	1	1	0	0	-2.99687	0.00999384	0.10951	8.60116	-0.180631	17.214	-2.99687	-29.9687	9.99384	1.0951	8.60116	0.150119	-180.631	0.300441
0.588	0.587	1	1	1	0	0	-2.99617	0.0102922	0.110214	8.59957	-0.15732	17.2124	-2.99617	-29.9617	10.2922	1.10214	8.59957	0.150091	-157.32	0.300413
0.598	0.597	1	1	1	0	0	-2.99582	0.00996294	0.11056	8.59831	-0.137351	17.2112	-2.99582	-29.9582	9.96294	1.1056	8.59831	0.150069	-137.351	0.300391
0.608	0.607	1	1	1	0	0	-2.99542	0.0100761	0.110961	8.59704	-0.139369	17.2099	-2.99542	-29.9542	10.0761	1.10961	8.59704	0.150047	-139.369	0.300369
0.618	0.617	1	1	1	0	0	-2.99476	0.0103376	0.111623	8.60013	-0.155007	17.213	-2.99476	-29.9476	10.3376	1.11623	8.60013	0.150101	-155.007	0.300423
0.626	0.625	1	1	1	0	0	-2.99462	0.0105542	0.111767	8.59831	-0.134285	17.2111	-2.99462	-29.9462	10.5542	1.11767	8.59831	0.150069	-134.285	0.300391
0.636	0.635	1	1	1	0	0	-2.99442	0.0100897	0.111964	8.60054	-0.147641	17.2134	-2.99442	-29.9442	10.0897	1.11964	8.60054	0.150108	-147.641	0.30043
0.646	0.645	1	1	1	0	0	-2.99408	0.010113	0.112299	8.59753	-0.149019	17.2104	-2.99408	-29.9408	10.113	1.12299	8.59753	0.150055	-149.019	0.300377
0.655	0.654	1	1	1	0	0	-2.99391	0.0103303	0.112474	8.59863	-0.152567	17.2115	-2.99391	-29.9391	10.3303	1.12474	8.59863	0.150074	-152.567	0.300397
0.658	0.657	1	1	2	0	0	-2.99396	0.010073	0.11242	8.60068	-0.140043	17.2135	-2.99396	-29.9396	10.073	1.1242	8.60068	0.15011	-140.043	0.300433
30.834	0	1	1	3	0	0	-2.88127	0.00996523	0.225115	8.58719	-0.149272	17.2	-2.88127	-28.8127	9.96523	2.25115	8.58719	0.149875	-149.272	0.300197
30.845	0.011	1	1	3	0	0	-2.8812	0.0100492	0.225186	8.59431	-0.141285	17.2072	-2.8812	-28.812	10.0492	2.25186	8.59431	0.149999	-141.285	0.300321
30.856	0.022	1	1	3	0	0	-2.88115	0.00970565	0.225232	8.59436	-0.140124	17.2072	-2.88115	-28.8115	9.70565	2.25232	8.59436	0.15	-140.124	0.300322
30.879	0.045	1	1	3	0	0	-2.88094	0.0103055	0.225439	8.59661	-0.170162	17.2095	-2.88094	-28.8094	10.3055	2.25439	8.59661	0.150039	-170.162	0.300362
30.893	0.059	1	1	3	0	0	-2.88066	0.00999985	0.225725	8.59434	-0.162212	17.2072	-2.88066	-28.8066	9.99985	2.25725	8.59434	0.15	-162.212	0.300322
30.903	0.069	1	1	3	0	0	-2.88025	0.0104027	0.226135	8.59446	-0.153733	17.2073	-2.88025	-28.8025	10.4027	2.26135	8.59446	0.150002	-153.733	0.300324
30.914	0.08	1	1	3	0	0	-2.87956	0.0107446	0.226823	8.59556	-0.168019	17.2084	-2.87956	-28.7956	10.7446	2.26823	8.59556	0.150021	-168.019	0.300343
30.925	0.091	1	1	3	0	0	-2.87869	0.0107967	0.227691	8.59644	-0.158679	17.2093	-2.87869	-28.7869	10.7967	2.27691	8.59644	0.150036	-158.679	0.300359
30.935	0.101	1	1	3	0	0	-2.87796	0.0107946	0.228419	8.59408	-0.150325	17.2069	-2.87796	-28.7796	10.7946	2.28419	8.59408	0.149995	-150.325	0.300317
30.946	0.112	1	1	3	0	0	-2.87688	0.011222	0.2295	8.59538	-0.155298	17.2082	-2.87688	-28.7688	11.222	2.295	8.59538	0.150018	-155.298	0.30034
30.957	0.123	1	1	3	0	0	-2.87502	0.0109702	0.231366	8.59678	-0.153821	17.2096	-2.87502	-28.7502	10.9702	2.31366	8.59678	0.150042	-153.821	0.300365
30.967	0.133	1	1	3	0	0	-2.87375	0.0114334	0.232631	8.59525	-0.155173	17.2081	-2.87375	-28.7375	11.4334	2.32631	8.59525	0.150015	-155.173	0.300338
30.978	0.144	1	1	3	0	0	-2.87199	0.0115356	0.234395	8.59436	-0.148232	17.2072	-2.87199	-28.7199	11.5356	2.34395	8.59436	0.15	-148.232	0.300322
30.989	0.155	1	1	3	0	0	-2.87019	0.0113346	0.236192	8.59564	-0.15097	17.2085	-2.87019	-28.7019	11.3346	2.36192	8.59564	0.150022	-150.97	0.300345
30.999	0.165	1	1	3	0	0	-2.86855	0.0114725	0.237831	8.5957	-0.15955	17.2085	-2.86855	-28.6855	11.4725	2.37831	8.5957	0.150023	-159.55	0.300346
31.01	0.176	1	1	3	0	0	-2.86607	0.0114676	0.240316	8.5954	-0.155746	17.2082	-2.86607	-28.6607	11.4676	2.40316	8.5954	0.150018	-155.746	0.30034
31.021	0.187	1	1	3	0	0	-2.86391	0.0116106	0.242474	8.59541	-0.153225	17.2082	-2.86391	-28.6391	11.6106	2.42474	8.59541	0.150018	-153.225	0.300341
31.031	0.197	1	1	3	0	0	-2.86191	0.0119181	0.244475	8.59813	-0.153586	17.211	-2.86191	-28.6191	11.9181	2.44475	8.59813	0.150066	-153.586	0.300388
31.042	0.208	1	1	3	0	0	-2.86016	0.011592	0.246219	8.59554	-0.152832	17.2084	-2.86016	-28.6016	11.592	2.46219	8.59554	0.15002	-152.832	0.300343
31.053	0.219	1	1	3	0	0	-2.85817	0.0119057	0.248208	8.59426	-0.144922	17.2071	-2.85817	-28.5817	11.9057	2.48208	8.59426	0.149998	-144.922	0.300321
31.063	0.229	1	1	3	0	0	-2.85627	0.012334	0.250112	8.59394	-0.145613	17.2068	-2.85627	-28.5627	12.334	2.50112	8.59394	0.149992	-145.613	0.300315
31.074	0.24	1	1	3	0	0	-2.85425	0.0121609	0.252134	8.59446	-0.143073	17.2073	-2.85425	-28.5425	12.1609	2.52134	8.59446	0.150002	-143.073	0.300324
31.085	0.251	1	1	3	0	0	-2.85272	0.0125433	0.253665	8.59414	-0.14559	17.207	-2.85272	-28.5272	12.5433	2.53665	8.59414	0.149996	-145.59	0.300318
31.095	0.261	1	1	3	0	0	-2.85096	0.0128364	0.255422	8.59672	-0.14372	17.2096	-2.85096	-28.5096	12.8364	2.55422	8.59672	0.150041	-143.72	0.300363
31.106	0.272	1	1	3	0	0	-2.84895	0.0129283	0.257429	8.59518	-0.143097	17.208	-2.84895	-28.4895	12.9283	2.57429	8.59518	0.150014	-143.097	0.300336
31.117	0.283	1	1	3	0	0	-2.84744	0.0130835	0.258944	8.59605	-0.145977	17.2089	-2.84744	-28.4744	13.0835	2.58944	8.59605	0.150029	-145.977	0.300352
31.128	0.294	1	1	3	0	0	-2.84623	0.0136657	0.260152	8.59429	-0.160432	17.2071	-2.84623	-28.4623	13.6657	2.60152	8.59429	0.149999	-160.432	0.300321
31.138	0.304	1	1	3	0	0	-2.84491	0.0133074	0.261472	8.59419	-0.145454	17.207	-2.84491	-28.4491	13.3074	2.61472	8.59419	0.149997	-145.454	0.300319
31.149	0.315	1	1	3	0	0	-2.84295	0.0138055	0.263434	8.59403	-0.147878	17.2069	-2.84295	-28.4295	13.8055	2.63434	8.59403	0.149994	-147.878	0.300316
31.16	0.326	1	1	3	0	0	-2.84124	0.014255	0.265143	8.5955	-0.152768	17.2083	-2.84124	-28.4124	14.255	2.65143	8.5955	0.15002	-152.768	0.300342
31.17	0.336	1	1	3	0	0	-2.83969	0.0142785	0.266694	8.59735	-0.147935	17.2102	-2.83969	-28.3969	14.2785	2.66694	8.59735	0.150052	-147.935	0.300375
31.181	0.347	1	1	3	0	0	-2.83811	0.0145321	0.268269	8.59519	-0.14649	17.208	-2.83811	-28.3811	14.5321	2.68269	8.59519	0.150014	-146.49	0.300337
31.192	0.358	1	1	3	0	0	-2.83603	0.0152442	0.270349	8.59485	-0.154298	17.2077	-2.83603	-28.3603	15.2442	2.70349	8.59485	0.150009	-154.298	0.300331
31.202	0.368	1	1	3	0	0	-2.83451	0.0150593	0.27187	8.59547	-0.142706	17.2083	-2.83451	-28.3451	15.0593	2.7187	8.59547	0.150019	-142.706	0.300342
31.213	0.379	1	1	3	0	0	-2.8329	0.0153686	0.273478	8.5951	-0.148023	17.2079	-2.8329	-28.329	15.3686	2.73478	8.5951	0.150013	-148.023	0.300335
31.228	0.394	1	1	3	0	0	-2.83069	0.0153481	0.275695	8.59531	-0.157398	17.2082	-2.83069	-28.3069	15.3481	2.75695	8.59531	0.150016	-157.398	0.300339
31.239	0.405	1	1	3	0	0	-2.82841	0.0159125	0.277971	8.59691	-0.159211	17.2098	-2.82841	-28.2841	15.9125	2.77971	8.59691	0.150044	-159.211	0.300367
31.249	0.415	1	1	3	0	0	-2.82638	0.0163753	0.280006	8.59521	-0.147833	17.2081	-2.82638	-28.2638	16.3753	2.80006	8.59521	0.150015	-147.833	0.300337
31.26	0.426	1	1	3	0	0	-2.82466	0.016143	0.28172	8.59645	-0.146332	17.2093	-2.82466	-28.2466	16.143	2.8172	8.59645	0.150036	-146.332	0.300359
31.271	0.437	1	1	3	0	0	-2.82272	0.0166582	0.283665	8.5944	-0.14514	17.2072	-2.82272	-28.2272	16.6582	2.83665	8.5944	0.150001	-145.14	0.300323
31.281	0.447	1	1	3	0	0	-2.82116	0.0168731	0.285227	8.59753	-0.150708	17.2104	-2.82116	-28.2116	16.8731	2.85227	8.59753	0.150055	-150.708	0.300377
31.292	0.458	1	1	3	0	0	-2.81905	0.0167998	0.287335	8.5969	-0.150947	17.2097	-2.81905	-28.1905	16.7998	2.87335	8.5969	0.150044	-150.947	0.300367
31.303	0.469	1	1	3	0	0	-2.81681	0.0172385	0.289569	8.59514	-0.155073	17.208	-2.81681	-28.1681	17.2385	2.89569	8.59514	0.150013	-155.073	0.300336
31.313	0.479	1	1	3	0	0	-2.81493	0.0172867	0.291452	8.59828	-0.141793	17.2111	-2.81493	-28.1493	17.2867	2.91452	8.59828	0.150068	-141.793	0.300391
31.324	0.49	1	1	3	0	0	-2.81298	0.0170124	0.293406	8.59538	-0.142595	17.2082	-2.81298	-28.1298	17.0124	2.93406	8.59538	0.150018	-142.595	0.30034
31.335	0.501	1	1	3	0	0	-2.81047	0.0171459	0.295913	8.59834	-0.145663	17.2112	-2.81047	-28.1047	17.1459	2.95913	8.59834	0.150069	-145.663	0.300392
31.345	0.511	1	1	3	0	0	-2.80859	0.0175345	0.297795	8.59446	-0.136421	17.2073	-2.80859	-28.0859	17.5345	2.97795	8.59446	0.150002	-136.421	0.300324
31.356	0.522	1	1	3	0	0	-2.80593	0.0173486	0.300456	8.59655	-0.139186	17.2094	-2.80593	-28.0593	17.3486	3.00456	8.59655	0.150038	-139.186	0.30036
31.367	0.533	1	1	3	0	0	-2.80432	0.0177688	0.302067	8.59497	-0.143646	17.2078	-2.80432	-28.0432	17.7688	3.02067	8.59497	0.15001	-143.646	0.300333
31.378	0.544	1	1	3	0	0	-2.80296	0.0179347	0.303421	8.59856	-0.152086	17.2114	-2.80296	-28.0296	17.9347	3.03421	8.59856	0.150073	-152.086	0.300396
31.388	0.554	1	1	3	0	0	-2.80141	0.0181361	0.30497	8.59487	-0.150715	17.2077	-2.80141	-28.0141	18.1361	3.0497	8.59487	0.150009	-150.715	0.300331
31.399	0.565	1	1	3	0	0	-2.79976	0.01836	0.306618	8.59821	-0.148501	17.211	-2.79976	-27.9976	18.36	3.06618	8.59821	0.150067	-148.501	0.300389
31.41	0.576	1	1	3	0	0	-2.79803	0.0189281	0.30835	8.59647	-0.14375	17.2093	-2.79803	-27.9803	18.9281	3.0835	8.59647	0.150037	-143.75	0.300359
31.42	0.586	1	1	3	0	0	-2.79653	0.0187842	0.309851	8.59526	-0.156575	17.2081	-2.79653	-27.9653	18.7842	3.09851	8.59526	0.150016	-156.575	0.300338
31.431	0.597	1	1	3	0	0	-2.79431	0.0195042	0.312076	8.59583	-0.156856	17.2087	-2.79431	-27.9431	19.5042	3.12076	8.59583	0.150026	-156.856	0.300348
31.442	0.608	1	1	3	0	0	-2.79298	0.0195457	0.313404	8.5941	-0.155502	17.2069	-2.79298	-27.9298	19.5457	3.13404	8.5941	0.149995	-155.502	0.300318
31.457	0.623	1	1	3	0	0	-2.79018	0.019955	0.316206	8.59563	-0.158644	17.2085	-2.79018	-27.9018	19.955	3.16206	8.59563	0.150022	-158.644	0.300345
31.467	0.633	1	1	3	0	0	-2.78859	0.020667	0.31779	8.59418	-0.145932	17.207	-2.78859	-27.8859	20.667	3.1779	8.59418	0.149997	-145.932	0.300319
31.478	0.644	1	1	3	0	0	-2.78672	0.0206349	0.319659	8.59745	-0.1548	17.2103	-2.78672	-27.8672	20.6349	3.19659	8.59745	0.150054	-154.8	0.300376
31.489	0.655	1	1	3	0	0	-2.78506	0.0211707	0.321322	8.59845	-0.147432	17.2113	-2.78506	-27.8506	21.1707	3.21322	8.59845	0.150071	-147.432	0.300394
31.499	0.665	1	1	3	0	0	-2.78412	0.0215002	0.322267	8.5965	-0.161433	17.2093	-2.78412	-27.8412	21.5002	3.22267	8.5965	0.150037	-161.433	0.30036
31.51	0.676	1	1	3	0	0	-2.78273	0.0215613	0.323651	8.59688	-0.156612	17.2097	-2.78273	-27.8273	21.5613	3.23651	8.59688	0.150044	-156.612	0.300366
31.521	0.687	1	1	3	0	0	-2.78052	0.022151	0.325866	8.59552	-0.156995	17.2084	-2.78052	-27.8052	22.151	3.25866	8.59552	0.15002	-156.995	0.300343
31.531	0.697	1	1	3	0	0	-2.77921	0.0228549	0.327173	8.59687	-0.156391	17.2097	-2.77921	-27.7921	22.8549	3.27173	8.59687	0.150044	-156.391	0.300366
31.542	0.708	1	1	3	0	0	-2.77759	0.0228982	0.328791	8.59551	-0.157226	17.2083	-2.77759	-27.7759	22.8982	3.28791	8.59551	0.15002	-157.226	0.300342
31.553	0.719	1	1	3	0	0	-2.77572	0.0234619	0.330658	8.59529	-0.153171	17.2081	-2.77572	-27.7572	23.4619	3.30658	8.59529	0.150016	-153.171	0.300339
31.563	0.729	1	1	3	0	0	-2.77428	0.0238407	0.332099	8.59635	-0.156831	17.2092	-2.77428	-27.7428	23.8407	3.32099	8.59635	0.150035	-156.831	0.300357
31.574	0.74	1	1	3	0	0	-2.77296	0.0237917	0.333419	8.59717	-0.150676	17.21	-2.77296	-27.7296	23.7917	3.33419	8.59717	0.150049	-150.676	0.300371
31.585	0.751	1	1	3	0	0	-2.77058	0.0245682	0.3358	8.59501	-0.146054	17.2079	-2.77058	-27.7058	24.5682	3.358	8.59501	0.150011	-146.054	0.300334
31.595	0.761	1	1	3	0	0	-2.76912	0.0250781	0.337267	8.5972	-0.143459	17.21	-2.76912	-27.6912	25.0781	3.37267	8.5972	0.150049	-143.459	0.300372
31.606	0.772	1	1	3	0	0	-2.76751	0.0250324	0.338877	8.59709	-0.142607	17.2099	-2.76751	-27.6751	25.0324	3.38877	8.59709	0.150048	-142.607	0.30037
31.617	0.783	1	1	3	0	0	-2.76584	0.025496	0.34054	8.59748	-0.147491	17.2103	-2.76584	-27.6584	25.496	3.4054	8.59748	0.150054	-147.491	0.300377
31.628	0.794	1	1	3	0	0	-2.76338	0.0260756	0.342998	8.59695	-0.152656	17.2098	-2.76338	-27.6338	26.0756	3.42998	8.59695	0.150045	-152.656	0.300368
31.638	0.804	1	1	3	0	0	-2.76166	0.0261734	0.344719	8.5971	-0.139501	17.2099	-2.76166	-27.6166	26.1734	3.44719	8.5971	0.150048	-139.501	0.30037
31.649	0.815	1	1	3	0	0	-2.75941	0.0271548	0.346977	8.59516	-0.139275	17.208	-2.75941	-27.5941	27.1548	3.46977	8.59516	0.150014	-139.275	0.300336
31.66	0.826	1	1	3	0	0	-2.75841	0.0267454	0.34797	8.59695	-0.154406	17.2098	-2.75841	-27.5841	26.7454	3.4797	8.59695	0.150045	-154.406	0.300367
31.67	0.836	1	1	3	0	0	-2.75663	0.0275623	0.349748	8.59603	-0.144406	17.2089	-2.75663	-27.5663	27.5623	3.49748	8.59603	0.150029	-144.406	0.300351
31.681	0.847	1	1	3	0	0	-2.75425	0.0281155	0.352134	8.59629	-0.146429	17.2091	-2.75425	-27.5425	28.1155	3.52134	8.59629	0.150034	-146.429	0.300356
31.692	0.858	1	1	3	0	0	-2.75254	0.0280056	0.353843	8.59747	-0.156592	17.2103	-2.75254	-27.5254	28.0056	3.53843	8.59747	0.150054	-156.592	0.300377
31.702	0.868	1	1	3	0	0	-2.75149	0.0284097	0.35489	8.59437	-0.142018	17.2072	-2.75149	-27.5149	28.4097	3.5489	8.59437	0.15	-142.018	0.300322
31.713	0.879	1	1	3	0	0	-2.74952	0.0290846	0.356865	8.59535	-0.146468	17.2082	-2.74952	-27.4952	29.0846	3.56865	8.59535	0.150017	-146.468	0.300339
31.724	0.89	1	1	3	0	0	-2.74723	0.0291525	0.359155	8.59639	-0.145464	17.2092	-2.74723	-27.4723	29.1525	3.59155	8.59639	0.150035	-145.464	0.300358
31.734	0.9	1	1	3	0	0	-2.74586	0.0297327	0.360525	8.59806	-0.138308	17.2109	-2.74586	-27.4586	29.7327	3.60525	8.59806	0.150064	-138.308	0.300387
31.745	0.911	1	1	3	0	0	-2.74386	0.0304013	0.362519	8.59385	-0.143499	17.2067	-2.74386	-27.4386	30.4013	3.62519	8.59385	0.149991	-143.499	0.300313
31.756	0.922	1	1	3	0	0	-2.74222	0.0301411	0.364162	8.59645	-0.146316	17.2093	-2.74222	-27.4222	30.1411	3.64162	8.59645	0.150036	-146.316	0.300359
31.766	0.932	1	1	3	0	0	-2.74063	0.03094	0.365757	8.59524	-0.147715	17.2081	-2.74063	-27.4063	30.94	3.65757	8.59524	0.150015	-147.715	0.300338
31.777	0.943	1	1	3	0	0	-2.7387	0.0312749	0.367684	8.59726	-0.135423	17.2101	-2.7387	-27.387	31.2749	3.67684	8.59726	0.15005	-135.423	0.300373
31.789	0.955	1	1	3	0	0	-2.73587	0.0318011	0.370517	8.59469	-0.160647	17.2075	-2.73587	-27.3587	31.8011	3.70517	8.59469	0.150006	-160.647	0.300328
31.8	0.966	1	1	3	0	0	-2.73379	0.0322838	0.372594	8.59831	-0.16334	17.2112	-2.73379	-27.3379	32.2838	3.72594	8.59831	0.150069	-163.34	0.300391
31.81	0.976	1	1	3	0	0	-2.73242	0.0325335	0.373967	8.59496	-0.15787	17.2078	-2.73242	-27.3242	32.5335	3.73967	8.59496	0.15001	-157.87	0.300333
31.821	0.987	1	1	3	0	0	-2.7308	0.0323603	0.375586	8.59465	-0.160729	17.2075	-2.7308	-27.308	32.3603	3.75586	8.59465	0.150005	-160.729	0.300327
31.832	0.998	1	1	3	0	0	-2.7284	0.0331697	0.377987	8.596	-0.170557	17.2088	-2.7284	-27.284	33.1697	3.77987	8.596	0.150029	-170.557	0.300351
31.842	1.008	1	1	3	0	0	-2.72716	0.0335058	0.379218	8.59465	-0.152388	17.2075	-2.72716	-27.2716	33.5058	3.79218	8.59465	0.150005	-152.388	0.300327
31.853	1.019	1	1	3	0	0	-2.72512	0.0334541	0.381263	8.59631	-0.156759	17.2091	-2.72512	-27.2512	33.4541	3.81263	8.59631	0.150034	-156.759	0.300356
31.864	1.03	1	1	3	0	0	-2.72338	0.0340276	0.383002	8.5946	-0.158186	17.2074	-2.72338	-27.2338	34.0276	3.83002	8.5946	0.150004	-158.186	0.300327
31.874	1.04	1	1	3	0	0	-2.72146	0.034521	0.384923	8.59672	-0.171386	17.2096	-2.72146	-27.2146	34.521	3.84923	8.59672	0.150041	-171.386	0.300363
31.885	1.051	1	1	3	0	0	-2.71939	0.0345749	0.386991	8.59695	-0.159502	17.2098	-2.71939	-27.1939	34.5749	3.86991	8.59695	0.150045	-159.502	0.300368
31.896	1.062	1	1	3	0	0	-2.71721	0.0352387	0.389175	8.59691	-0.151722	17.2098	-2.71721	-27.1721	35.2387	3.89175	8.59691	0.150044	-151.722	0.300367
31.906	1.072	1	1	3	0	0	-2.71547	0.0353982	0.390909	8.60043	-0.155451	17.2133	-2.71547	-27.1547	35.3982	3.90909	8.60043	0.150106	-155.451	0.300428
31.917	1.083	1	1	3	0	0	-2.71337	0.0355555	0.393014	8.59623	-0.156542	17.2091	-2.71337	-27.1337	35.5555	3.93014	8.59623	0.150032	-156.542	0.300355
31.928	1.094	1	1	3	0	0	-2.71165	0.036316	0.394732	8.59627	-0.156955	17.2091	-2.71165	-27.1165	36.316	3.94732	8.59627	0.150033	-156.955	0.300356
31.938	1.104	1	1	3	0	0	-2.70981	0.036045	0.396569	8.59871	-0.153753	17.2115	-2.70981	-27.0981	36.045	3.96569	8.59871	0.150076	-153.753	0.300398
31.949	1.115	1	1	3	0	0	-2.70777	0.0367907	0.398615	8.59527	-0.14341	17.2081	-2.70777	-27.0777	36.7907	3.98615	8.59527	0.150016	-143.41	0.300338
31.96	1.126	1	1	3	0	0	-2.70564	0.0370231	0.400741	8.59897	-0.149268	17.2118	-2.70564	-27.0564	37.0231	4.00741	8.59897	0.15008	-149.268	0.300403
31.97	1.136	1	1	3	0	0	-2.70364	0.0372199	0.402742	8.59489	-0.153224	17.2077	-2.70364	-27.0364	37.2199	4.02742	8.59489	0.150009	-153.224	0.300332
31.981	1.147	1	1	3	0	0	-2.70181	0.0375547	0.404573	8.599	-0.154801	17.2118	-2.70181	-27.0181	37.5547	4.04573	8.599	0.150081	-154.801	0.300403
31.992	1.158	1	1	3	0	0	-2.69972	0.0380947	0.406661	8.60074	-0.145914	17.2136	-2.69972	-26.9972	38.0947	4.06661	8.60074	0.150111	-145.914	0.300434
32.002	1.168	1	1	3	0	0	-2.69787	0.0381102	0.408512	8.59871	-0.166819	17.2116	-2.69787	-26.9787	38.1102	4.08512	8.59871	0.150076	-166.819	0.300398
32.013	1.179	1	1	3	0	0	-2.69584	0.038509	0.410543	8.59478	-0.14753	17.2076	-2.69584	-26.9584	38.509	4.10543	8.59478	0.150007	-147.53	0.30033
32.023	1.189	1	1	3	0	0	-2.69385	0.0390694	0.412534	8.60372	-0.160611	17.2166	-2.69385	-26.9385	39.0694	4.12534	8.60372	0.150163	-160.611	0.300486
32.034	1.2	1	1	3	0	0	-2.69159	0.0391137	0.414789	8.59482	-0.143972	17.2077	-2.69159	-26.9159	39.1137	4.14789	8.59482	0.150008	-143.972	0.30033
32.044	1.21	1	1	3	0	0	-2.69019	0.039444	0.416189	8.59574	-0.171624	17.2086	-2.69019	-26.9019	39.444	4.16189	8.59574	0.150024	-171.624	0.300346
32.055	1.221	1	1	3	0	0	-2.68814	0.0398977	0.418242	8.59716	-0.16368	17.21	-2.68814	-26.8814	39.8977	4.18242	8.59716	0.150049	-163.68	0.300371
32.066	1.232	1	1	3	0	0	-2.68583	0.0398856	0.420553	8.59982	-0.147522	17.2127	-2.68583	-26.8583	39.8856	4.20553	8.59982	0.150095	-147.522	0.300418
32.077	1.243	1	1	3	0	0	-2.68361	0.0405365	0.422774	8.5945	-0.135126	17.2073	-2.68361	-26.8361	40.5365	4.22774	8.5945	0.150002	-135.126	0.300325
32.087	1.253	1	1	3	0	0	-2.6818	0.0410522	0.424586	8.59963	-0.15958	17.2125	-2.6818	-26.818	41.0522	4.24586	8.59963	0.150092	-159.58	0.300414
32.098	1.264	1	1	3	0	0	-2.67985	0.0408524	0.426535	8.59449	-0.155046	17.2073	-2.67985	-26.7985	40.8524	4.26535	8.59449	0.150002	-155.046	0.300325
32.108	1.274	1	1	3	0	0	-2.67821	0.0412138	0.428176	8.59713	-0.16072	17.21	-2.67821	-26.7821	41.2138	4.28176	8.59713	0.150048	-160.72	0.300371
32.119	1.285	1	1	3	0	0	-2.67629	0.0419136	0.430093	8.59579	-0.144643	17.2086	-2.67629	-26.7629	41.9136	4.30093	8.59579	0.150025	-144.643	0.300347
32.13	1.296	1	1	3	0	0	-2.67412	0.0419714	0.432258	8.59395	-0.153361	17.2068	-2.67412	-26.7412	41.9714	4.32258	8.59395	0.149993	-153.361	0.300315
32.141	1.307	1	1	3	0	0	-2.67227	0.0422059	0.434116	8.59759	-0.165074	17.2104	-2.67227	-26.7227	42.2059	4.34116	8.59759	0.150056	-165.074	0.300379
32.151	1.317	1	1	3	0	0	-2.67056	0.0426481	0.435824	8.59819	-0.161618	17.211	-2.67056	-26.7056	42.6481	4.35824	8.59819	0.150067	-161.618	0.300389
32.162	1.328	1	1	3	0	0	-2.66876	0.0425711	0.437626	8.59636	-0.152321	17.2092	-2.66876	-26.6876	42.5711	4.37626	8.59636	0.150035	-152.321	0.300357
32.172	1.338	1	1	3	0	0	-2.66647	0.0434634	0.439917	8.5962	-0.176472	17.209	-2.66647	-26.6647	43.4634	4.39917	8.5962	0.150032	-176.472	0.300354
32.185	1.351	1	1	3	0	0	-2.66439	0.0435222	0.441992	8.59941	-0.165021	17.2123	-2.66439	-26.6439	43.5222	4.41992	8.59941	0.150088	-165.021	0.30041
32.196	1.362	1	1	3	0	0	-2.66248	0.0436436	0.4439	8.59705	-0.169472	17.2099	-2.66248	-26.6248	43.6436	4.439	8.59705	0.150047	-169.472	0.300369
32.206	1.372	1	1	3	0	0	-2.66097	0.0442336	0.445415	8.60131	-0.175376	17.2141	-2.66097	-26.6097	44.2336	4.45415	8.60131	0.150121	-175.376	0.300444
32.217	1.383	1	1	3	0	0	-2.65851	0.0444596	0.447869	8.59633	-0.175572	17.2092	-2.65851	-26.5851	44.4596	4.47869	8.59633	0.150034	-175.572	0.300357
32.227	1.393	1	1	3	0	0	-2.65677	0.0449532	0.449616	8.59844	-0.15873	17.2113	-2.65677	-26.5677	44.9532	4.49616	8.59844	0.150071	-158.73	0.300394
32.238	1.404	1	1	3	0	0	-2.65521	0.0456196	0.451175	8.59754	-0.169907	17.2104	-2.65521	-26.5521	45.6196	4.51175	8.59754	0.150055	-169.907	0.300378
32.249	1.415	1	1	3	0	0	-2.65322	0.0456702	0.45316	8.59802	-0.166137	17.2109	-2.65322	-26.5322	45.6702	4.5316	8.59802	0.150064	-166.137	0.300386
32.26	1.426	1	1	3	0	0	-2.65171	0.0461873	0.454672	8.5964	-0.160532	17.2092	-2.65171	-26.5171	46.1873	4.54672	8.5964	0.150035	-160.532	0.300358
32.27	1.436	1	1	3	0	0	-2.64954	0.0472333	0.456839	8.5978	-0.157906	17.2106	-2.64954	-26.4954	47.2333	4.56839	8.5978	0.15006	-157.906	0.300382
32.281	1.447	1	1	3	0	0	-2.64807	0.0467626	0.458311	8.59722	-0.165356	17.2101	-2.64807	-26.4807	46.7626	4.58311	8.59722	0.15005	-165.356	0.300372
32.291	1.457	1	1	3	0	0	-2.64692	0.0472752	0.459461	8.59938	-0.145148	17.2122	-2.64692	-26.4692	47.2752	4.59461	8.59938	0.150087	-145.148	0.30041
32.302	1.468	1	1	3	0	0	-2.64558	0.0478249	0.4608	8.59501	-0.141086	17.2079	-2.64558	-26.4558	47.8249	4.608	8.59501	0.150011	-141.086	0.300334
32.313	1.479	1	1	3	0	0	-2.64359	0.0480891	0.462795	8.59669	-0.1493	17.2095	-2.64359	-26.4359	48.0891	4.62795	8.59669	0.150041	-149.3	0.300363
32.324	1.49	1	1	3	0	0	-2.64216	0.0485612	0.464226	8.59718	-0.157835	17.21	-2.64216	-26.4216	48.5612	4.64226	8.59718	0.150049	-157.835	0.300371
32.334	1.5	1	1	3	0	0	-2.64021	0.0494463	0.466169	8.59636	-0.142622	17.2092	-2.64021	-26.4021	49.4463	4.66169	8.59636	0.150035	-142.622	0.300357
32.345	1.511	1	1	3	0	0	-2.63857	0.049476	0.467809	8.59705	-0.150409	17.2099	-2.63857	-26.3857	49.476	4.67809	8.59705	0.150047	-150.409	0.300369
32.355	1.521	1	1	3	0	0	-2.63708	0.0503317	0.469299	8.59574	-0.150383	17.2086	-2.63708	-26.3708	50.3317	4.69299	8.59574	0.150024	-150.383	0.300346
32.366	1.532	1	1	3	0	0	-2.6354	0.0506948	0.470985	8.59882	-0.1505	17.2117	-2.6354	-26.354	50.6948	4.70985	8.59882	0.150078	-150.5	0.3004
32.377	1.543	1	1	3	0	0	-2.63364	0.0510132	0.472744	8.59842	-0.156906	17.2113	-2.63364	-26.3364	51.0132	4.72744	8.59842	0.150071	-156.906	0.300393
32.388	1.554	1	1	3	0	0	-2.63199	0.0515245	0.474388	8.59747	-0.164697	17.2103	-2.63199	-26.3199	51.5245	4.74388	8.59747	0.150054	-164.697	0.300377
32.398	1.564	1	1	3	0	0	-2.63045	0.0521826	0.475928	8.59856	-0.16706	17.2114	-2.63045	-26.3045	52.1826	4.75928	8.59856	0.150073	-167.06	0.300396
32.409	1.575	1	1	3	0	0	-2.62828	0.0525345	0.478104	8.59584	-0.164083	17.2087	-2.62828	-26.2828	52.5345	4.78104	8.59584	0.150026	-164.083	0.300348
32.419	1.585	1	1	3	0	0	-2.62693	0.0530919	0.479453	8.59614	-0.157178	17.209	-2.62693	-26.2693	53.0919	4.79453	8.59614	0.150031	-157.178	0.300353
32.43	1.596	1	1	3	0	0	-2.62478	0.0538297	0.481606	8.60012	-0.169874	17.213	-2.62478	-26.2478	53.8297	4.81606	8.60012	0.1501	-169.874	0.300423
32.441	1.607	1	1	3	0	0	-2.62278	0.0539737	0.4836	8.59597	-0.176596	17.2088	-2.62278	-26.2278	53.9737	4.836	8.59597	0.150028	-176.596	0.30035
32.452	1.618	1	1	3	0	0	-2.62108	0.0547016	0.485299	8.59798	-0.170958	17.2108	-2.62108	-26.2108	54.7016	4.85299	8.59798	0.150063	-170.958	0.300385
32.462	1.628	1	1	3	0	0	-2.61988	0.0549398	0.486503	8.60036	-0.175136	17.2132	-2.61988	-26.1988	54.9398	4.86503	8.60036	0.150105	-175.136	0.300427
32.473	1.639	1	1	3	0	0	-2.61782	0.0553149	0.488561	8.59533	-0.173559	17.2082	-2.61782	-26.1782	55.3149	4.88561	8.59533	0.150017	-173.559	0.300339
32.483	1.649	1	1	3	0	0	-2.61626	0.0560838	0.490122	8.59889	-0.171441	17.2117	-2.61626	-26.1626	56.0838	4.90122	8.59889	0.150079	-171.441	0.300401
32.494	1.66	1	1	3	0	0	-2.61426	0.0564616	0.492126	8.59961	-0.182431	17.2125	-2.61426	-26.1426	56.4616	4.92126	8.59961	0.150092	-182.431	0.300414
32.505	1.671	1	1	3	0	0	-2.61304	0.0567046	0.493341	8.5967	-0.171929	17.2095	-2.61304	-26.1304	56.7046	4.93341	8.5967	0.150041	-171.929	0.300363
32.516	1.682	1	1	3	0	0	-2.61085	0.0577148	0.495529	8.59553	-0.163591	17.2084	-2.61085	-26.1085	57.7148	4.95529	8.59553	0.15002	-163.591	0.300343
32.526	1.692	1	1	3	0	0	-2.60878	0.0578606	0.497603	8.59928	-0.170685	17.2121	-2.60878	-26.0878	57.8606	4.97603	8.59928	0.150086	-170.685	0.300408
32.537	1.703	1	1	3	0	0	-2.607	0.058685	0.499382	8.59741	-0.166999	17.2103	-2.607	-26.07	58.685	4.99382	8.59741	0.150053	-166.999	0.300376
32.547	1.713	1	1	3	0	0	-2.60551	0.0591123	0.500872	8.59472	-0.170382	17.2076	-2.60551	-26.0551	59.1123	5.00872	8.59472	0.150006	-170.382	0.300329
32.558	1.724	1	1	3	0	0	-2.60378	0.0592654	0.502607	8.59757	-0.175217	17.2104	-2.60378	-26.0378	59.2654	5.02607	8.59757	0.150056	-175.217	0.300378
32.569	1.735	1	1	3	0	0	-2.60166	0.0599751	0.50472	8.59775	-0.168805	17.2106	-2.60166	-26.0166	59.9751	5.0472	8.59775	0.150059	-168.805	0.300381
32.58	1.746	1	1	3	0	0	-2.59995	0.0606861	0.506428	8.59712	-0.170409	17.21	-2.59995	-25.9995	60.6861	5.06428	8.59712	0.150048	-170.409	0.300371
32.59	1.756	1	1	3	0	0	-2.59864	0.060721	0.507742	8.59969	-0.167519	17.2125	-2.59864	-25.9864	60.721	5.07742	8.59969	0.150093	-167.519	0.300415
32.601	1.767	1	1	3	0	0	-2.59705	0.061369	0.509333	8.59909	-0.167566	17.2119	-2.59705	-25.9705	61.369	5.09333	8.59909	0.150082	-167.566	0.300405
32.611	1.777	1	1	3	0	0	-2.59484	0.0622514	0.511539	8.59668	-0.18043	17.2095	-2.59484	-25.9484	62.2514	5.11539	8.59668	0.15004	-180.43	0.300363
32.622	1.788	1	1	3	0	0	-2.59295	0.0624197	0.513432	8.59978	-0.176934	17.2126	-2.59295	-25.9295	62.4197	5.13432	8.59978	0.150095	-176.934	0.300417
32.633	1.799	1	1	3	0	0	-2.59098	0.0631273	0.515405	8.59964	-0.17754	17.2125	-2.59098	-25.9098	63.1273	5.15405	8.59964	0.150092	-177.54	0.300415
32.647	1.813	1	1	3	0	0	-2.58877	0.0637796	0.517608	8.59911	-0.168625	17.2119	-2.58877	-25.8877	63.7796	5.17608	8.59911	0.150083	-168.625	0.300405
32.657	1.823	1	1	3	0	0	-2.58682	0.0640466	0.519563	8.59758	-0.174458	17.2104	-2.58682	-25.8682	64.0466	5.19563	8.59758	0.150056	-174.458	0.300379
32.668	1.834	1	1	3	0	0	-2.58501	0.0647861	0.521368	8.5986	-0.18027	17.2114	-2.58501	-25.8501	64.7861	5.21368	8.5986	0.150074	-180.27	0.300396
32.679	1.845	1	1	3	0	0	-2.58359	0.0650576	0.52279	8.59503	-0.172767	17.2079	-2.58359	-25.8359	65.0576	5.2279	8.59503	0.150012	-172.767	0.300334
32.69	1.856	1	1	3	0	0	-2.5813	0.0657791	0.52508	8.59739	-0.169987	17.2102	-2.5813	-25.813	65.7791	5.2508	8.59739	0.150053	-169.987	0.300375
32.7	1.866	1	1	3	0	0	-2.57931	0.0665047	0.527072	8.60024	-0.176592	17.2131	-2.57931	-25.7931	66.5047	5.27072	8.60024	0.150103	-176.592	0.300425
32.711	1.877	1	1	3	0	0	-2.57751	0.0666173	0.528874	8.59767	-0.163738	17.2105	-2.57751	-25.7751	66.6173	5.28874	8.59767	0.150058	-163.738	0.30038
32.721	1.887	1	1	3	0	0	-2.57607	0.067145	0.530314	8.59592	-0.17065	17.2088	-2.57607	-25.7607	67.145	5.30314	8.59592	0.150027	-170.65	0.300349
32.732	1.898	1	1	3	0	0	-2.5741	0.0679149	0.532283	8.59699	-0.172076	17.2098	-2.5741	-25.741	67.9149	5.32283	8.59699	0.150046	-172.076	0.300368
32.752	1.918	1	1	3	0	0	-2.57085	0.0685596	0.535537	8.59858	-0.160604	17.2114	-2.57085	-25.7085	68.5596	5.35537	8.59858	0.150074	-160.604	0.300396
32.763	1.929	1	1	3	0	0	-2.56939	0.0690942	0.536996	8.59894	-0.161167	17.2118	-2.56939	-25.6939	69.0942	5.36996	8.59894	0.15008	-161.167	0.300402
32.773	1.939	1	1	3	0	0	-2.56718	0.0692666	0.539199	8.59555	-0.16569	17.2084	-2.56718	-25.6718	69.2666	5.39199	8.59555	0.150021	-165.69	0.300343
32.784	1.95	1	1	3	0	0	-2.56552	0.0700337	0.540859	8.59997	-0.170381	17.2128	-2.56552	-25.6552	70.0337	5.40859	8.59997	0.150098	-170.381	0.30042
32.794	1.96	1	1	3	0	0	-2.56346	0.070799	0.54292	8.59812	-0.173843	17.211	-2.56346	-25.6346	70.799	5.4292	8.59812	0.150066	-173.843	0.300388
32.805	1.971	1	1	3	0	0	-2.56187	0.0704637	0.544509	8.59982	-0.171986	17.2127	-2.56187	-25.6187	70.4637	5.44509	8.59982	0.150095	-171.986	0.300418
32.816	1.982	1	1	3	0	0	-2.5598	0.0715849	0.546582	8.59789	-0.157352	17.2107	-2.5598	-25.598	71.5849	5.46582	8.59789	0.150062	-157.352	0.300384
32.827	1.993	1	1	3	0	0	-2.55762	0.072304	0.548762	8.59585	-0.155306	17.2087	-2.55762	-25.5762	72.304	5.48762	8.59585	0.150026	-155.306	0.300348
32.837	2.003	1	1	3	0	0	-2.55602	0.0725042	0.55036	8.60105	-0.162821	17.2139	-2.55602	-25.5602	72.5042	5.5036	8.60105	0.150117	-162.821	0.300439
32.848	2.014	1	1	3	0	0	-2.5543	0.0727333	0.552085	8.59676	-0.159148	17.2096	-2.5543	-25.543	72.7333	5.52085	8.59676	0.150042	-159.148	0.300364
32.858	2.024	1	1	3	0	0	-2.55298	0.0732619	0.553407	8.59721	-0.167003	17.2101	-2.55298	-25.5298	73.2619	5.53407	8.59721	0.15005	-167.003	0.300372
32.869	2.035	1	1	3	0	0	-2.55055	0.0738783	0.555829	8.5975	-0.161175	17.2103	-2.55055	-25.5055	73.8783	5.55829	8.5975	0.150055	-161.175	0.300377
32.88	2.046	1	1	3	0	0	-2.54844	0.074621	0.557942	8.59635	-0.150601	17.2092	-2.54844	-25.4844	74.621	5.57942	8.59635	0.150035	-150.601	0.300357
32.891	2.057	1	1	3	0	0	-2.54634	0.0754777	0.560038	8.59769	-0.161079	17.2105	-2.54634	-25.4634	75.4777	5.60038	8.59769	0.150058	-161.079	0.30038
32.901	2.067	1	1	3	0	0	-2.54493	0.0751772	0.561451	8.59963	-0.162378	17.2125	-2.54493	-25.4493	75.1772	5.61451	8.59963	0.150092	-162.378	0.300414
32.912	2.078	1	1	3	0	0	-2.54276	0.0761359	0.563618	8.59728	-0.161275	17.2101	-2.54276	-25.4276	76.1359	5.63618	8.59728	0.150051	-161.275	0.300373
32.922	2.088	1	1	3	0	0	-2.54129	0.0764279	0.565095	8.59901	-0.169335	17.2119	-2.54129	-25.4129	76.4279	5.65095	8.59901	0.150081	-169.335	0.300404
32.933	2.099	1	1	3	0	0	-2.53902	0.0768595	0.56736	8.60152	-0.168838	17.2144	-2.53902	-25.3902	76.8595	5.6736	8.60152	0.150125	-168.838	0.300447
32.944	2.11	1	1	3	0	0	-2.53721	0.0773344	0.569168	8.59769	-0.167103	17.2105	-2.53721	-25.3721	77.3344	5.69168	8.59769	0.150058	-167.103	0.30038
32.955	2.121	1	1	3	0	0	-2.53522	0.0782278	0.571159	8.59508	-0.160571	17.2079	-2.53522	-25.3522	78.2278	5.71159	8.59508	0.150012	-160.571	0.300335
32.965	2.131	1	1	3	0	0	-2.53355	0.0781618	0.572835	8.59942	-0.158411	17.2123	-2.53355	-25.3355	78.1618	5.72835	8.59942	0.150088	-158.411	0.300411
32.976	2.142	1	1	3	0	0	-2.53136	0.0787915	0.575026	8.59887	-0.15309	17.2117	-2.53136	-25.3136	78.7915	5.75026	8.59887	0.150079	-153.09	0.300401
32.986	2.152	1	1	3	0	0	-2.52977	0.0795234	0.576609	8.59681	-0.168015	17.2097	-2.52977	-25.2977	79.5234	5.76609	8.59681	0.150043	-168.015	0.300365
32.997	2.163	1	1	3	0	0	-2.52771	0.0795349	0.57867	8.59793	-0.162101	17.2108	-2.52771	-25.2771	79.5349	5.7867	8.59793	0.150062	-162.101	0.300385
33.014	2.18	1	1	3	0	0	-2.52513	0.0804527	0.581257	8.59726	-0.182221	17.2101	-2.52513	-25.2513	80.4527	5.81257	8.59726	0.150051	-182.221	0.300373
33.025	2.191	1	1	3	0	0	-2.52317	0.0805794	0.583211	8.59882	-0.175892	17.2117	-2.52317	-25.2317	80.5794	5.83211	8.59882	0.150078	-175.892	0.3004
33.035	2.201	1	1	3	0	0	-2.52151	0.081312	0.584872	8.60028	-0.190819	17.2131	-2.52151	-25.2151	81.312	5.84872	8.60028	0.150103	-190.819	0.300426
33.046	2.212	1	1	3	0	0	-2.51922	0.0819664	0.58716	8.59553	-0.179342	17.2084	-2.51922	-25.1922	81.9664	5.8716	8.59553	0.15002	-179.342	0.300343
33.057	2.223	1	1	3	0	0	-2.51736	0.0821136	0.589026	8.59765	-0.16901	17.2105	-2.51736	-25.1736	82.1136	5.89026	8.59765	0.150057	-169.01	0.30038
33.068	2.234	1	1	3	0	0	-2.51555	0.0826106	0.590828	8.59712	-0.169763	17.21	-2.51555	-25.1555	82.6106	5.90828	8.59712	0.150048	-169.763	0.30037
33.078	2.244	1	1	3	0	0	-2.51367	0.0834021	0.592711	8.60028	-0.192703	17.2131	-2.51367	-25.1367	83.4021	5.92711	8.60028	0.150103	-192.703	0.300426
33.089	2.255	1	1	3	0	0	-2.51185	0.0835426	0.594535	8.59901	-0.186842	17.2119	-2.51185	-25.1185	83.5426	5.94535	8.59901	0.150081	-186.842	0.300404
33.099	2.265	1	1	3	0	0	-2.5108	0.0837584	0.595583	8.59803	-0.175975	17.2109	-2.5108	-25.108	83.7584	5.95583	8.59803	0.150064	-175.975	0.300386
33.11	2.276	1	1	3	0	0	-2.50867	0.0847231	0.597712	8.59981	-0.1741	17.2126	-2.50867	-25.0867	84.7231	5.97712	8.59981	0.150095	-174.1	0.300417
33.121	2.287	1	1	3	0	0	-2.50653	0.0845965	0.599855	8.59652	-0.155869	17.2094	-2.50653	-25.0653	84.5965	5.99855	8.59652	0.150038	-155.869	0.30036
33.132	2.298	1	1	3	0	0	-2.50484	0.0851408	0.601539	8.59804	-0.166127	17.2109	-2.50484	-25.0484	85.1408	6.01539	8.59804	0.150064	-166.127	0.300386
33.142	2.308	1	1	3	0	0	-2.50297	0.0858975	0.60341	8.59846	-0.157929	17.2113	-2.50297	-25.0297	85.8975	6.0341	8.59846	0.150072	-157.929	0.300394
33.153	2.319	1	1	3	0	0	-2.50044	0.0863514	0.605942	8.60056	-0.167707	17.2134	-2.50044	-25.0044	86.3514	6.05942	8.60056	0.150108	-167.707	0.30043
33.165	2.331	1	1	3	0	0	-2.49847	0.0869764	0.607915	8.59819	-0.192035	17.211	-2.49847	-24.9847	86.9764	6.07915	8.59819	0.150067	-192.035	0.300389
33.176	2.342	1	1	3	0	0	-2.49607	0.0872239	0.610314	8.59887	-0.186639	17.2117	-2.49607	-24.9607	87.2239	6.10314	8.59887	0.150079	-186.639	0.300401
33.187	2.353	1	1	3	0	0	-2.4945	0.0875938	0.611879	8.59573	-0.17549	17.2086	-2.4945	-24.945	87.5938	6.11879	8.59573	0.150024	-175.49	0.300346
33.197	2.363	1	1	3	0	0	-2.49282	0.0880365	0.61356	8.60003	-0.175287	17.2129	-2.49282	-24.9282	88.0365	6.1356	8.60003	0.150099	-175.287	0.300421
33.208	2.374	1	1	3	0	0	-2.49063	0.0883153	0.615749	8.59841	-0.172534	17.2113	-2.49063	-24.9063	88.3153	6.15749	8.59841	0.150071	-172.534	0.300393
33.218	2.384	1	1	3	0	0	-2.48898	0.0888686	0.617404	8.59959	-0.19003	17.2124	-2.48898	-24.8898	88.8686	6.17404	8.59959	0.150091	-190.03	0.300414
33.229	2.395	1	1	3	0	0	-2.48746	0.0893406	0.618923	8.59767	-0.182437	17.2105	-2.48746	-24.8746	89.3406	6.18923	8.59767	0.150058	-182.437	0.30038
33.24	2.406	1	1	3	0	0	-2.48575	0.0893068	0.620636	8.60064	-0.167295	17.2135	-2.48575	-24.8575	89.3068	6.20636	8.60064	0.150109	-167.295	0.300432
33.251	2.417	1	1	3	0	0	-2.48387	0.0901217	0.622517	8.59668	-0.152526	17.2095	-2.48387	-24.8387	90.1217	6.22517	8.59668	0.15004	-152.526	0.300363
33.261	2.427	1	1	3	0	0	-2.48241	0.0905818	0.623968	8.59724	-0.173796	17.2101	-2.48241	-24.8241	90.5818	6.23968	8.59724	0.15005	-173.796	0.300373
33.272	2.438	1	1	3	0	0	-2.47977	0.0910732	0.626614	8.59978	-0.173994	17.2126	-2.47977	-24.7977	91.0732	6.26614	8.59978	0.150094	-173.994	0.300417
33.282	2.448	1	1	3	0	0	-2.47796	0.0916001	0.62842	8.59951	-0.158287	17.2123	-2.47796	-24.7796	91.6001	6.2842	8.59951	0.15009	-158.287	0.300412
33.293	2.459	1	1	3	0	0	-2.47598	0.0924309	0.6304	8.60164	-0.170875	17.2145	-2.47598	-24.7598	92.4309	6.304	8.60164	0.150127	-170.875	0.300449
33.304	2.47	1	1	3	0	0	-2.47423	0.0924881	0.632156	8.59756	-0.176019	17.2104	-2.47423	-24.7423	92.4881	6.32156	8.59756	0.150056	-176.019	0.300378
33.315	2.481	1	1	3	0	0	-2.47199	0.0930091	0.634397	8.59709	-0.184695	17.2099	-2.47199	-24.7199	93.0091	6.34397	8.59709	0.150047	-184.695	0.30037
33.325	2.491	1	1	3	0	0	-2.47057	0.0934446	0.635814	8.59766	-0.168402	17.2105	-2.47057	-24.7057	93.4446	6.35814	8.59766	0.150057	-168.402	0.30038
33.336	2.502	1	1	3	0	0	-2.46862	0.0936231	0.637764	8.60263	-0.169552	17.2155	-2.46862	-24.6862	93.6231	6.37764	8.60263	0.150144	-169.552	0.300467
33.346	2.512	1	1	3	0	0	-2.46719	0.0940355	0.639191	8.59829	-0.152947	17.2111	-2.46719	-24.6719	94.0355	6.39191	8.59829	0.150068	-152.947	0.300391
33.357	2.523	1	1	3	0	0	-2.46519	0.0947157	0.64119	8.59981	-0.155587	17.2126	-2.46519	-24.6519	94.7157	6.4119	8.59981	0.150095	-155.587	0.300417
33.368	2.534	1	1	3	0	0	-2.46367	0.0945163	0.642712	8.599	-0.164291	17.2118	-2.46367	-24.6367	94.5163	6.42712	8.599	0.150081	-164.291	0.300403
33.379	2.545	1	1	3	0	0	-2.46162	0.0952866	0.644764	8.59901	-0.180009	17.2119	-2.46162	-24.6162	95.2866	6.44764	8.59901	0.150081	-180.009	0.300404
33.389	2.555	1	1	3	0	0	-2.45968	0.0960885	0.646702	8.59815	-0.157492	17.211	-2.45968	-24.5968	96.0885	6.46702	8.59815	0.150066	-157.492	0.300388
33.4	2.566	1	1	3	0	0	-2.45864	0.0957383	0.647747	8.59881	-0.166187	17.2116	-2.45864	-24.5864	95.7383	6.47747	8.59881	0.150078	-166.187	0.3004
33.41	2.576	1	1	3	0	0	-2.45716	0.0960994	0.64922	8.59536	-0.154463	17.2082	-2.45716	-24.5716	96.0994	6.4922	8.59536	0.150017	-154.463	0.30034
33.421	2.587	1	1	3	0	0	-2.45543	0.0966144	0.65095	8.59887	-0.168873	17.2117	-2.45543	-24.5543	96.6144	6.5095	8.59887	0.150079	-168.873	0.300401
33.432	2.598	1	1	3	0	0	-2.45308	0.0973084	0.653302	8.5998	-0.172208	17.2126	-2.45308	-24.5308	97.3084	6.53302	8.5998	0.150095	-172.208	0.300417
33.443	2.609	1	1	3	0	0	-2.45095	0.0979288	0.655435	8.59606	-0.181053	17.2089	-2.45095	-24.5095	97.9288	6.55435	8.59606	0.15003	-181.053	0.300352
33.453	2.619	1	1	3	0	0	-2.44857	0.0984448	0.657815	8.59824	-0.168997	17.2111	-2.44857	-24.4857	98.4448	6.57815	8.59824	0.150068	-168.997	0.30039
33.464	2.63	1	1	3	0	0	-2.44687	0.0986892	0.659515	8.6002	-0.181039	17.213	-2.44687	-24.4687	98.6892	6.59515	8.6002	0.150102	-181.039	0.300424
33.474	2.64	1	1	3	0	0	-2.44551	0.0991733	0.660872	8.60149	-0.159167	17.2143	-2.44551	-24.4551	99.1733	6.60872	8.60149	0.150124	-159.167	0.300447
33.485	2.651	1	1	3	0	0	-2.44377	0.0991692	0.66261	8.59691	-0.166299	17.2098	-2.44377	-24.4377	99.1692	6.6261	8.59691	0.150044	-166.299	0.300367
33.492	2.658	1	1	3	0	0	-2.44252	0.099849	0.663866	8.60456	-0.179138	17.2174	-2.44252	-24.4252	99.849	6.63866	8.60456	0.150178	-179.138	0.3005
33.502	2.668	1	1	3	0	0	-2.44127	0.10008	0.665116	8.59978	-0.165694	17.2126	-2.44127	-24.4127	100.08	6.65116	8.59978	0.150094	-165.694	0.300417
33.513	2.679	1	1	3	0	0	-2.43904	0.100738	0.667344	8.59768	-0.168418	17.2105	-2.43904	-24.3904	100.738	6.67344	8.59768	0.150058	-168.418	0.30038
33.523	2.689	1	1	3	0	0	-2.43748	0.100721	0.668905	8.59859	-0.16432	17.2114	-2.43748	-24.3748	100.721	6.68905	8.59859	0.150074	-164.32	0.300396
33.534	2.7	1	1	3	0	0	-2.43567	0.101482	0.670715	8.59879	-0.164029	17.2116	-2.43567	-24.3567	101.482	6.70715	8.59879	0.150077	-164.029	0.3004
33.544	2.71	1	1	3	0	0	-2.43407	0.101804	0.672313	8.59472	-0.158431	17.2076	-2.43407	-24.3407	101.804	6.72313	8.59472	0.150006	-158.431	0.300329
33.555	2.721	1	1	3	0	0	-2.43186	0.102275	0.674525	8.59881	-0.163047	17.2116	-2.43186	-24.3186	102.275	6.74525	8.59881	0.150078	-163.047	0.3004
33.566	2.732	1	1	3	0	0	-2.43073	0.102453	0.675654	8.59863	-0.170828	17.2115	-2.43073	-24.3073	102.453	6.75654	8.59863	0.150074	-170.828	0.300397
33.577	2.743	1	1	3	0	0	-2.42886	0.102515	0.677518	8.59824	-0.182033	17.2111	-2.42886	-24.2886	102.515	6.77518	8.59824	0.150068	-182.033	0.30039
33.587	2.753	1	1	3	0	0	-2.42704	0.103278	0.679345	8.59882	-0.158399	17.2117	-2.42704	-24.2704	103.278	6.79345	8.59882	0.150078	-158.399	0.3004
33.602	2.768	1	1	3	0	0	-2.42541	0.103629	0.680976	8.60067	-0.184252	17.2135	-2.42541	-24.2541	103.629	6.80976	8.60067	0.15011	-184.252	0.300433
33.613	2.779	1	1	3	0	0	-2.42277	0.104088	0.683612	8.60001	-0.192418	17.2129	-2.42277	-24.2277	104.088	6.83612	8.60001	0.150098	-192.418	0.300421
33.624	2.79	1	1	3	0	0	-2.42081	0.104908	0.685572	8.60151	-0.175932	17.2143	-2.42081	-24.2081	104.908	6.85572	8.60151	0.150125	-175.932	0.300447
33.635	2.801	1	1	3	0	0	-2.41919	0.105378	0.687189	8.59737	-0.177061	17.2102	-2.41919	-24.1919	105.378	6.87189	8.59737	0.150052	-177.061	0.300375
33.645	2.811	1	1	3	0	0	-2.4173	0.105612	0.68908	8.59756	-0.188504	17.2104	-2.4173	-24.173	105.612	6.8908	8.59756	0.150056	-188.504	0.300378
33.656	2.822	1	1	3	0	0	-2.41514	0.106366	0.69124	8.59993	-0.179505	17.2128	-2.41514	-24.1514	106.366	6.9124	8.59993	0.150097	-179.505	0.30042
33.666	2.832	1	1	3	0	0	-2.41378	0.106692	0.6926	8.59466	-0.166707	17.2075	-2.41378	-24.1378	106.692	6.926	8.59466	0.150005	-166.707	0.300327
33.677	2.843	1	1	3	0	0	-2.41188	0.106836	0.694504	8.59936	-0.175349	17.2122	-2.41188	-24.1188	106.836	6.94504	8.59936	0.150087	-175.349	0.30041
33.688	2.854	1	1	3	0	0	-2.41053	0.107168	0.695855	8.60023	-0.173798	17.2131	-2.41053	-24.1053	107.168	6.95855	8.60023	0.150102	-173.798	0.300425
33.699	2.865	1	1	3	0	0	-2.40868	0.107711	0.697703	8.59765	-0.171288	17.2105	-2.40868	-24.0868	107.711	6.97703	8.59765	0.150057	-171.288	0.30038
33.709	2.875	1	1	3	0	0	-2.40669	0.108049	0.69969	8.59994	-0.175061	17.2128	-2.40669	-24.0669	108.049	6.9969	8.59994	0.150097	-175.061	0.30042
33.72	2.886	1	1	3	0	0	-2.40549	0.108476	0.700897	8.59851	-0.175424	17.2113	-2.40549	-24.0549	108.476	7.00897	8.59851	0.150072	-175.424	0.300395
33.73	2.896	1	1	3	0	0	-2.4038	0.109035	0.702582	8.59766	-0.167541	17.2105	-2.4038	-24.038	109.035	7.02582	8.59766	0.150057	-167.541	0.30038
33.741	2.907	1	1	3	0	0	-2.40223	0.108966	0.704153	8.59938	-0.168317	17.2122	-2.40223	-24.0223	108.966	7.04153	8.59938	0.150088	-168.317	0.30041
33.752	2.918	1	1	3	0	0	-2.40016	0.109904	0.706224	8.59872	-0.17753	17.2116	-2.40016	-24.0016	109.904	7.06224	8.59872	0.150076	-177.53	0.300398
33.763	2.929	1	1	3	0	0	-2.39843	0.10986	0.707953	8.59688	-0.1764	17.2097	-2.39843	-23.9843	109.86	7.07953	8.59688	0.150044	-176.4	0.300366
33.773	2.939	1	1	3	0	0	-2.39694	0.110218	0.709444	8.60117	-0.170091	17.214	-2.39694	-23.9694	110.218	7.09444	8.60117	0.150119	-170.091	0.300441
33.784	2.95	1	1	3	0	0	-2.39534	0.111053	0.711041	8.59889	-0.155074	17.2117	-2.39534	-23.9534	111.053	7.11041	8.59889	0.150079	-155.074	0.300401
33.794	2.96	1	1	3	0	0	-2.39355	0.111084	0.71283	8.59868	-0.190777	17.2115	-2.39355	-23.9355	111.084	7.1283	8.59868	0.150075	-190.777	0.300398
33.805	2.971	1	1	3	0	0	-2.39184	0.111493	0.714538	8.59939	-0.185509	17.2122	-2.39184	-23.9184	111.493	7.14538	8.59939	0.150088	-185.509	0.30041
33.816	2.982	1	1	3	0	0	-2.38987	0.112414	0.716511	8.6005	-0.17512	17.2133	-2.38987	-23.8987	112.414	7.16511	8.6005	0.150107	-175.12	0.30043
33.827	2.993	1	1	3	0	0	-2.38838	0.112239	0.717999	8.59703	-0.175752	17.2099	-2.38838	-23.8838	112.239	7.17999	8.59703	0.150047	-175.752	0.300369
33.837	3.003	1	1	3	0	0	-2.38616	0.113114	0.720223	8.59953	-0.187049	17.2124	-2.38616	-23.8616	113.114	7.20223	8.59953	0.15009	-187.049	0.300412
33.848	3.014	1	1	3	0	0	-2.3849	0.113425	0.72148	8.59637	-0.183414	17.2092	-2.3849	-23.849	113.425	7.2148	8.59637	0.150035	-183.414	0.300357
33.858	3.024	1	1	3	0	0	-2.38323	0.113498	0.723157	8.59444	-0.178741	17.2073	-2.38323	-23.8323	113.498	7.23157	8.59444	0.150001	-178.741	0.300324
33.869	3.035	1	1	3	0	0	-2.38113	0.114397	0.725251	8.59987	-0.187072	17.2127	-2.38113	-23.8113	114.397	7.25251	8.59987	0.150096	-187.072	0.300418
33.88	3.046	1	1	3	0	0	-2.37954	0.114753	0.726843	8.59893	-0.191481	17.2118	-2.37954	-23.7954	114.753	7.26843	8.59893	0.15008	-191.481	0.300402
33.891	3.057	1	1	3	0	0	-2.37745	0.114948	0.728936	8.59689	-0.187325	17.2097	-2.37745	-23.7745	114.948	7.28936	8.59689	0.150044	-187.325	0.300366
33.901	3.067	1	1	3	0	0	-2.37618	0.115491	0.730202	8.60054	-0.17105	17.2134	-2.37618	-23.7618	115.491	7.30202	8.60054	0.150108	-171.05	0.30043
33.912	3.078	1	1	3	0	0	-2.37428	0.115907	0.732103	8.60201	-0.168115	17.2148	-2.37428	-23.7428	115.907	7.32103	8.60201	0.150133	-168.115	0.300456
33.922	3.088	1	1	3	0	0	-2.37324	0.115659	0.733146	8.59866	-0.174235	17.2115	-2.37324	-23.7324	115.659	7.33146	8.59866	0.150075	-174.235	0.300397
33.933	3.099	1	1	3	0	0	-2.37116	0.116681	0.735221	8.60132	-0.166248	17.2142	-2.37116	-23.7116	116.681	7.35221	8.60132	0.150121	-166.248	0.300444
33.944	3.11	1	1	3	0	0	-2.36949	0.11713	0.73689	8.59912	-0.166691	17.212	-2.36949	-23.6949	117.13	7.3689	8.59912	0.150083	-166.691	0.300405
33.956	3.122	1	1	3	0	0	-2.36772	0.117114	0.738665	8.59914	-0.206917	17.212	-2.36772	-23.6772	117.114	7.38665	8.59914	0.150083	-206.917	0.300406
33.967	3.133	1	1	3	0	0	-2.36567	0.1178	0.740714	8.60002	-0.200853	17.2129	-2.36567	-23.6567	117.8	7.40714	8.60002	0.150099	-200.853	0.300421
33.977	3.143	1	1	3	0	0	-2.36444	0.118182	0.741943	8.59797	-0.194016	17.2108	-2.36444	-23.6444	118.182	7.41943	8.59797	0.150063	-194.016	0.300385
33.988	3.154	1	1	3	0	0	-2.3629	0.118315	0.743486	8.59748	-0.186289	17.2103	-2.3629	-23.629	118.315	7.43486	8.59748	0.150054	-186.289	0.300377
33.999	3.165	1	1	3	0	0	-2.36095	0.119037	0.745432	8.59769	-0.180366	17.2105	-2.36095	-23.6095	119.037	7.45432	8.59769	0.150058	-180.366	0.30038
34.01	3.176	1	1	3	0	0	-2.35865	0.119307	0.747736	8.60076	-0.179007	17.2136	-2.35865	-23.5865	119.307	7.47736	8.60076	0.150111	-179.007	0.300434
34.02	3.186	1	1	3	0	0	-2.35725	0.119663	0.749137	8.59904	-0.19614	17.2119	-2.35725	-23.5725	119.663	7.49137	8.59904	0.150082	-196.14	0.300404
34.031	3.197	1	1	3	0	0	-2.35513	0.120488	0.751257	8.59581	-0.182576	17.2087	-2.35513	-23.5513	120.488	7.51257	8.59581	0.150025	-182.576	0.300348
34.047	3.213	1	1	3	0	0	-2.35287	0.120524	0.753509	8.59892	-0.172561	17.2118	-2.35287	-23.5287	120.524	7.53509	8.59892	0.150079	-172.561	0.300402
34.058	3.224	1	1	3	0	0	-2.35137	0.121029	0.755014	8.59676	-0.177084	17.2096	-2.35137	-23.5137	121.029	7.55014	8.59676	0.150042	-177.084	0.300364
34.069	3.235	1	1	3	0	0	-2.34928	0.121935	0.757106	8.60086	-0.191738	17.2137	-2.34928	-23.4928	121.935	7.57106	8.60086	0.150113	-191.738	0.300436
34.08	3.246	1	1	3	0	0	-2.34792	0.12167	0.758465	8.59851	-0.19826	17.2113	-2.34792	-23.4792	121.67	7.58465	8.59851	0.150072	-198.26	0.300395
34.09	3.256	1	1	3	0	0	-2.34608	0.12229	0.760301	8.59826	-0.184772	17.2111	-2.34608	-23.4608	122.29	7.60301	8.59826	0.150068	-184.772	0.30039
34.101	3.267	1	1	3	0	0	-2.34474	0.122601	0.761643	8.60006	-0.193637	17.2129	-2.34474	-23.4474	122.601	7.61643	8.60006	0.150099	-193.637	0.300422
34.111	3.277	1	1	3	0	0	-2.34291	0.122851	0.763477	8.60194	-0.180506	17.2148	-2.34291	-23.4291	122.851	7.63477	8.60194	0.150132	-180.506	0.300454
34.122	3.288	1	1	3	0	0	-2.34152	0.123242	0.764858	8.59963	-0.185893	17.2125	-2.34152	-23.4152	123.242	7.64858	8.59963	0.150092	-185.893	0.300414
34.133	3.299	1	1	3	0	0	-2.33909	0.123875	0.767292	8.59881	-0.190158	17.2116	-2.33909	-23.3909	123.875	7.67292	8.59881	0.150078	-190.158	0.3004
34.144	3.31	1	1	3	0	0	-2.33744	0.124318	0.768938	8.59856	-0.191094	17.2114	-2.33744	-23.3744	124.318	7.68938	8.59856	0.150073	-191.094	0.300395
34.154	3.32	1	1	3	0	0	-2.33535	0.12491	0.771036	8.59922	-0.184791	17.2121	-2.33535	-23.3535	124.91	7.71036	8.59922	0.150085	-184.791	0.300407
34.165	3.331	1	1	3	0	0	-2.33374	0.124837	0.772646	8.5967	-0.188548	17.2095	-2.33374	-23.3374	124.837	7.72646	8.5967	0.150041	-188.548	0.300363
34.175	3.341	1	1	3	0	0	-2.33221	0.125439	0.774177	8.59912	-0.191336	17.212	-2.33221	-23.3221	125.439	7.74177	8.59912	0.150083	-191.336	0.300405
34.186	3.352	1	1	3	0	0	-2.33067	0.125823	0.775709	8.59982	-0.185735	17.2127	-2.33067	-23.3067	125.823	7.75709	8.59982	0.150095	-185.735	0.300418
34.197	3.363	1	1	3	0	0	-2.32894	0.12582	0.777441	8.5959	-0.172492	17.2087	-2.32894	-23.2894	125.82	7.77441	8.5959	0.150027	-172.492	0.300349
34.208	3.374	1	1	3	0	0	-2.32723	0.126429	0.779153	8.59608	-0.16907	17.2089	-2.32723	-23.2723	126.429	7.79153	8.59608	0.15003	-169.07	0.300352
34.218	3.384	1	1	3	0	0	-2.32587	0.126929	0.780514	8.5962	-0.180751	17.209	-2.32587	-23.2587	126.929	7.80514	8.5962	0.150032	-180.751	0.300354
34.229	3.395	1	1	3	0	0	-2.32383	0.127172	0.782554	8.59863	-0.186002	17.2115	-2.32383	-23.2383	127.172	7.82554	8.59863	0.150074	-186.002	0.300397
34.24	3.406	1	1	3	0	0	-2.32228	0.127358	0.784101	8.59948	-0.178508	17.2123	-2.32228	-23.2228	127.358	7.84101	8.59948	0.150089	-178.508	0.300412
34.251	3.417	1	1	3	0	0	-2.32088	0.128214	0.785504	8.59685	-0.183862	17.2097	-2.32088	-23.2088	128.214	7.85504	8.59685	0.150043	-183.862	0.300366
34.261	3.427	1	1	3	0	0	-2.31917	0.128083	0.787214	8.59641	-0.166765	17.2092	-2.31917	-23.1917	128.083	7.87214	8.59641	0.150036	-166.765	0.300358
34.272	3.438	1	1	3	0	0	-2.31645	0.129103	0.789934	8.59912	-0.179512	17.212	-2.31645	-23.1645	129.103	7.89934	8.59912	0.150083	-179.512	0.300405
34.282	3.448	1	1	3	0	0	-2.31538	0.129389	0.790999	8.59874	-0.164853	17.2116	-2.31538	-23.1538	129.389	7.90999	8.59874	0.150076	-164.853	0.300399
34.302	3.468	1	1	3	0	0	-2.31231	0.129786	0.79407	8.59845	-0.198532	17.2113	-2.31231	-23.1231	129.786	7.9407	8.59845	0.150071	-198.532	0.300394
34.313	3.479	1	1	3	0	0	-2.30984	0.130616	0.796546	8.59785	-0.18816	17.2107	-2.30984	-23.0984	130.616	7.96546	8.59785	0.150061	-188.16	0.300383
34.324	3.49	1	1	3	0	0	-2.3085	0.130575	0.79788	8.598	-0.180966	17.2108	-2.3085	-23.085	130.575	7.9788	8.598	0.150063	-180.966	0.300386
34.334	3.5	1	1	3	0	0	-2.30673	0.131231	0.799655	8.60133	-0.208915	17.2142	-2.30673	-23.0673	131.231	7.99655	8.60133	0.150122	-208.915	0.300444
34.345	3.511	1	1	3	0	0	-2.30493	0.131584	0.801457	8.59981	-0.203208	17.2126	-2.30493	-23.0493	131.584	8.01457	8.59981	0.150095	-203.208	0.300417
34.355	3.521	1	1	3	0	0	-2.3036	0.131521	0.802785	8.59906	-0.182106	17.2119	-2.3036	-23.036	131.521	8.02785	8.59906	0.150082	-182.106	0.300404
34.366	3.532	1	1	3	0	0	-2.302	0.131999	0.804383	8.60186	-0.193812	17.2147	-2.302	-23.02	131.999	8.04383	8.60186	0.150131	-193.812	0.300453
34.377	3.543	1	1	3	0	0	-2.30031	0.132624	0.806076	8.59945	-0.192415	17.2123	-2.30031	-23.0031	132.624	8.06076	8.59945	0.150089	-192.415	0.300411
34.388	3.554	1	1	3	0	0	-2.29837	0.132755	0.808017	8.60075	-0.18667	17.2136	-2.29837	-22.9837	132.755	8.08017	8.60075	0.150111	-186.67	0.300434
34.398	3.564	1	1	3	0	0	-2.29727	0.132978	0.80911	8.60106	-0.178824	17.2139	-2.29727	-22.9727	132.978	8.0911	8.60106	0.150117	-178.824	0.300439
34.409	3.575	1	1	3	0	0	-2.29486	0.134025	0.811518	8.59988	-0.166265	17.2127	-2.29486	-22.9486	134.025	8.11518	8.59988	0.150096	-166.265	0.300419
34.419	3.585	1	1	3	0	0	-2.29268	0.134145	0.813703	8.60138	-0.189859	17.2142	-2.29268	-22.9268	134.145	8.13703	8.60138	0.150122	-189.859	0.300445
34.43	3.596	1	1	3	0	0	-2.29188	0.134185	0.814506	8.60146	-0.190675	17.2143	-2.29188	-22.9188	134.185	8.14506	8.60146	0.150124	-190.675	0.300446
34.441	3.607	1	1	3	0	0	-2.29003	0.134837	0.816356	8.60044	-0.182854	17.2133	-2.29003	-22.9003	134.837	8.16356	8.60044	0.150106	-182.854	0.300428
34.452	3.618	1	1	3	0	0	-2.28765	0.135217	0.818733	8.60071	-0.172096	17.2135	-2.28765	-22.8765	135.217	8.18733	8.60071	0.150111	-172.096	0.300433
34.462	3.628	1	1	3	0	0	-2.28581	0.135915	0.82057	8.59853	-0.179142	17.2114	-2.28581	-22.8581	135.915	8.2057	8.59853	0.150073	-179.142	0.300395
34.473	3.639	1	1	3	0	0	-2.28397	0.136136	0.822408	8.59784	-0.177844	17.2107	-2.28397	-22.8397	136.136	8.22408	8.59784	0.150061	-177.844	0.300383
34.483	3.649	1	1	3	0	0	-2.28241	0.136225	0.823977	8.59829	-0.194686	17.2111	-2.28241	-22.8241	136.225	8.23977	8.59829	0.150069	-194.686	0.300391
34.494	3.66	1	1	3	0	0	-2.28047	0.136929	0.825912	8.5994	-0.186273	17.2122	-2.28047	-22.8047	136.929	8.25912	8.5994	0.150088	-186.273	0.30041
34.505	3.671	1	1	3	0	0	-2.27858	0.137099	0.827798	8.59768	-0.181564	17.2105	-2.27858	-22.7858	137.099	8.27798	8.59768	0.150058	-181.564	0.30038
34.516	3.682	1	1	3	0	0	-2.27742	0.137067	0.828965	8.59879	-0.182287	17.2116	-2.27742	-22.7742	137.067	8.28965	8.59879	0.150077	-182.287	0.3004
34.526	3.692	1	1	3	0	0	-2.27565	0.137796	0.830729	8.59698	-0.18715	17.2098	-2.27565	-22.7565	137.796	8.30729	8.59698	0.150046	-187.15	0.300368
34.537	3.703	1	1	3	0	0	-2.27297	0.138276	0.833413	8.5995	-0.186447	17.2123	-2.27297	-22.7297	138.276	8.33413	8.5995	0.15009	-186.447	0.300412
34.547	3.713	1	1	3	0	0	-2.27207	0.138252	0.834314	8.59549	-0.187107	17.2083	-2.27207	-22.7207	138.252	8.34314	8.59549	0.15002	-187.107	0.300342
34.558	3.724	1	1	3	0	0	-2.27065	0.138786	0.835735	8.59712	-0.191533	17.21	-2.27065	-22.7065	138.786	8.35735	8.59712	0.150048	-191.533	0.30037
34.569	3.735	1	1	3	0	0	-2.2686	0.138962	0.837785	8.59868	-0.18884	17.2115	-2.2686	-22.686	138.962	8.37785	8.59868	0.150075	-188.84	0.300398
34.58	3.746	1	1	3	0	0	-2.26731	0.13936	0.839072	8.59742	-0.19336	17.2103	-2.26731	-22.6731	139.36	8.39072	8.59742	0.150053	-193.36	0.300376
34.59	3.756	1	1	3	0	0	-2.26566	0.139845	0.84072	8.60032	-0.175921	17.2132	-2.26566	-22.6566	139.845	8.4072	8.60032	0.150104	-175.921	0.300426
34.601	3.767	1	1	3	0	0	-2.26382	0.139935	0.842563	8.59561	-0.180144	17.2084	-2.26382	-22.6382	139.935	8.42563	8.59561	0.150022	-180.144	0.300344
34.611	3.777	1	1	3	0	0	-2.26174	0.140841	0.844645	8.59831	-0.192796	17.2112	-2.26174	-22.6174	140.841	8.44645	8.59831	0.150069	-192.796	0.300391
34.622	3.788	1	1	3	0	0	-2.26075	0.140741	0.845631	8.59775	-0.187331	17.2106	-2.26075	-22.6075	140.741	8.45631	8.59775	0.150059	-187.331	0.300381
34.633	3.799	1	1	3	0	0	-2.25844	0.14109	0.847938	8.60021	-0.185672	17.2131	-2.25844	-22.5844	141.09	8.47938	8.60021	0.150102	-185.672	0.300424
34.644	3.81	1	1	3	0	0	-2.2565	0.141634	0.849879	8.60037	-0.188357	17.2132	-2.2565	-22.565	141.634	8.49879	8.60037	0.150105	-188.357	0.300427
34.654	3.82	1	1	3	0	0	-2.25511	0.142126	0.851273	8.59929	-0.176673	17.2121	-2.25511	-22.5511	142.126	8.51273	8.59929	0.150086	-176.673	0.300408
34.665	3.831	1	1	3	0	0	-2.25315	0.142154	0.853228	8.59841	-0.186526	17.2113	-2.25315	-22.5315	142.154	8.53228	8.59841	0.150071	-186.526	0.300393
34.675	3.841	1	1	3	0	0	-2.2511	0.14283	0.855278	8.59609	-0.164266	17.2089	-2.2511	-22.511	142.83	8.55278	8.59609	0.15003	-164.266	0.300353
34.686	3.852	1	1	3	0	0	-2.24939	0.143254	0.856996	8.60321	-0.184607	17.216	-2.24939	-22.4939	143.254	8.56996	8.60321	0.150154	-184.607	0.300477
34.697	3.863	1	1	3	0	0	-2.24854	0.14253	0.857847	8.59873	-0.182078	17.2116	-2.24854	-22.4854	142.53	8.57847	8.59873	0.150076	-182.078	0.300399
34.708	3.874	1	1	3	0	0	-2.24596	0.143685	0.860425	8.59667	-0.189327	17.2095	-2.24596	-22.4596	143.685	8.60425	8.59667	0.15004	-189.327	0.300363
34.718	3.884	1	1	3	0	0	-2.24429	0.14423	0.862094	8.59889	-0.19701	17.2117	-2.24429	-22.4429	144.23	8.62094	8.59889	0.150079	-197.01	0.300401
34.729	3.895	1	1	3	0	0	-2.24264	0.14397	0.863745	8.59845	-0.191877	17.2113	-2.24264	-22.4264	143.97	8.63745	8.59845	0.150071	-191.877	0.300394
34.74	3.906	1	1	3	0	0	-2.24074	0.144819	0.865639	8.59974	-0.188988	17.2126	-2.24074	-22.4074	144.819	8.65639	8.59974	0.150094	-188.988	0.300416
34.751	3.917	1	1	3	0	0	-2.23912	0.144981	0.867258	8.59621	-0.188239	17.2091	-2.23912	-22.3912	144.981	8.67258	8.59621	0.150032	-188.239	0.300355
34.761	3.927	1	1	3	0	0	-2.23806	0.144731	0.868327	8.59901	-0.205914	17.2119	-2.23806	-22.3806	144.731	8.68327	8.59901	0.150081	-205.914	0.300404
34.772	3.938	1	1	3	0	0	-2.23601	0.145436	0.870371	8.59879	-0.210529	17.2116	-2.23601	-22.3601	145.436	8.70371	8.59879	0.150077	-210.529	0.3004
34.782	3.948	1	1	3	0	0	-2.23412	0.146121	0.872266	8.59843	-0.190809	17.2113	-2.23412	-22.3412	146.121	8.72266	8.59843	0.150071	-190.809	0.300393
34.793	3.959	1	1	3	0	0	-2.23227	0.146069	0.874113	8.59785	-0.196429	17.2107	-2.23227	-22.3227	146.069	8.74113	8.59785	0.150061	-196.429	0.300383
34.804	3.97	1	1	3	0	0	-2.2308	0.146582	0.87558	8.59709	-0.199313	17.2099	-2.2308	-22.308	146.582	8.7558	8.59709	0.150047	-199.313	0.30037
34.815	3.981	1	1	3	0	0	-2.22886	0.14652	0.877524	8.59826	-0.20594	17.2111	-2.22886	-22.2886	146.52	8.77524	8.59826	0.150068	-205.94	0.30039
34.825	3.991	1	1	3	0	0	-2.22758	0.146961	0.878807	8.59914	-0.187294	17.212	-2.22758	-22.2758	146.961	8.78807	8.59914	0.150083	-187.294	0.300406
34.836	4.002	1	1	3	0	0	-2.22522	0.147809	0.881164	8.59962	-0.194103	17.2125	-2.22522	-22.2522	147.809	8.81164	8.59962	0.150092	-194.103	0.300414
34.846	4.012	1	1	3	0	0	-2.22357	0.147776	0.882811	8.59917	-0.205615	17.212	-2.22357	-22.2357	147.776	8.82811	8.59917	0.150084	-205.615	0.300406
34.857	4.023	1	1	3	0	0	-2.22123	0.1484	0.885155	8.59714	-0.197833	17.21	-2.22123	-22.2123	148.4	8.85155	8.59714	0.150048	-197.833	0.300371
34.868	4.034	1	1	3	0	0	-2.22007	0.148664	0.886308	8.59971	-0.18675	17.2126	-2.22007	-22.2007	148.664	8.86308	8.59971	0.150093	-186.75	0.300416
34.879	4.045	1	1	3	0	0	-2.21807	0.148549	0.888315	8.59913	-0.188758	17.212	-2.21807	-22.1807	148.549	8.88315	8.59913	0.150083	-188.758	0.300406
34.889	4.055	1	1	3	0	0	-2.21611	0.149341	0.890271	8.60154	-0.17805	17.2144	-2.21611	-22.1611	149.341	8.90271	8.60154	0.150125	-178.05	0.300448
34.9	4.066	1	1	3	0	0	-2.21494	0.149364	0.891444	8.5979	-0.181509	17.2107	-2.21494	-22.1494	149.364	8.91444	8.5979	0.150062	-181.509	0.300384
34.91	4.076	1	1	3	0	0	-2.21284	0.149651	0.893542	8.59584	-0.183283	17.2087	-2.21284	-22.1284	149.651	8.93542	8.59584	0.150026	-183.283	0.300348
34.921	4.087	1	1	3	0	0	-2.21121	0.150121	0.895177	8.60025	-0.180551	17.2131	-2.21121	-22.1121	150.121	8.95177	8.60025	0.150103	-180.551	0.300425
34.932	4.098	1	1	3	0	0	-2.20929	0.150632	0.897089	8.59877	-0.182008	17.2116	-2.20929	-22.0929	150.632	8.97089	8.59877	0.150077	-182.008	0.300399
34.943	4.109	1	1	3	0	0	-2.20786	0.150367	0.898525	8.59744	-0.185705	17.2103	-2.20786	-22.0786	150.367	8.98525	8.59744	0.150054	-185.705	0.300376
34.953	4.119	1	1	3	0	0	-2.20565	0.151236	0.900737	8.59726	-0.192321	17.2101	-2.20565	-22.0565	151.236	9.00737	8.59726	0.150051	-192.321	0.300373
34.964	4.13	1	1	3	0	0	-2.20404	0.151816	0.902338	8.59925	-0.20691	17.2121	-2.20404	-22.0404	151.816	9.02338	8.59925	0.150085	-206.91	0.300408
34.974	4.14	1	1	3	0	0	-2.20177	0.151879	0.90461	8.59453	-0.176293	17.2074	-2.20177	-22.0177	151.879	9.0461	8.59453	0.150003	-176.293	0.300325
34.985	4.151	1	1	3	0	0	-2.20008	0.152279	0.906305	8.59657	-0.178879	17.2094	-2.20008	-22.0008	152.279	9.06305	8.59657	0.150038	-178.879	0.300361
34.996	4.162	1	1	3	0	0	-2.19835	0.15275	0.908035	8.59997	-0.200588	17.2128	-2.19835	-21.9835	152.75	9.08035	8.59997	0.150098	-200.588	0.30042
35.007	4.173	1	1	3	0	0	-2.19654	0.152831	0.909842	8.60025	-0.206607	17.2131	-2.19654	-21.9654	152.831	9.09842	8.60025	0.150103	-206.607	0.300425
35.017	4.183	1	1	3	0	0	-2.19497	0.153219	0.911409	8.60014	-0.196121	17.213	-2.19497	-21.9497	153.219	9.11409	8.60014	0.150101	-196.121	0.300423
35.028	4.194	1	1	3	0	0	-2.19357	0.153399	0.912812	8.59811	-0.189565	17.211	-2.19357	-21.9357	153.399	9.12812	8.59811	0.150065	-189.565	0.300388
35.038	4.204	1	1	3	0	0	-2.19154	0.153438	0.914842	8.59962	-0.189692	17.2125	-2.19154	-21.9154	153.438	9.14842	8.59962	0.150092	-189.692	0.300414
35.049	4.215	1	1	3	0	0	-2.18981	0.154102	0.916577	8.59822	-0.189798	17.2111	-2.18981	-21.8981	154.102	9.16577	8.59822	0.150067	-189.798	0.30039
35.065	4.231	1	1	3	0	0	-2.18703	0.154431	0.919352	8.59647	-0.202772	17.2093	-2.18703	-21.8703	154.431	9.19352	8.59647	0.150037	-202.772	0.300359
35.075	4.241	1	1	3	0	0	-2.18544	0.154717	0.920943	8.59885	-0.220759	17.2117	-2.18544	-21.8544	154.717	9.20943	8.59885	0.150078	-220.759	0.300401
35.086	4.252	1	1	3	0	0	-2.18364	0.15541	0.922746	8.59822	-0.224251	17.2111	-2.18364	-21.8364	155.41	9.22746	8.59822	0.150067	-224.251	0.30039
35.096	4.262	1	1	3	0	0	-2.18185	0.15538	0.924535	8.59854	-0.210274	17.2114	-2.18185	-21.8185	155.38	9.24535	8.59854	0.150073	-210.274	0.300395
35.107	4.273	1	1	3	0	0	-2.18004	0.155812	0.926338	8.5999	-0.208645	17.2127	-2.18004	-21.8004	155.812	9.26338	8.5999	0.150097	-208.645	0.300419
35.118	4.284	1	1	3	0	0	-2.17857	0.156041	0.927814	8.60028	-0.207299	17.2131	-2.17857	-21.7857	156.041	9.27814	8.60028	0.150103	-207.299	0.300426
35.129	4.295	1	1	3	0	0	-2.17655	0.156262	0.92983	8.59921	-0.201123	17.212	-2.17655	-21.7655	156.262	9.2983	8.59921	0.150084	-201.123	0.300407
35.139	4.305	1	1	3	0	0	-2.1752	0.156464	0.931178	8.60028	-0.219985	17.2131	-2.1752	-21.752	156.464	9.31178	8.60028	0.150103	-219.985	0.300426
35.15	4.316	1	1	3	0	0	-2.17354	0.157027	0.932838	8.59867	-0.220111	17.2115	-2.17354	-21.7354	157.027	9.32838	8.59867	0.150075	-220.111	0.300398
35.16	4.326	1	1	3	0	0	-2.17185	0.157012	0.934532	8.59717	-0.205548	17.21	-2.17185	-21.7185	157.012	9.34532	8.59717	0.150049	-205.548	0.300371
35.171	4.337	1	1	3	0	0	-2.16936	0.157897	0.937019	8.59973	-0.221165	17.2126	-2.16936	-21.6936	157.897	9.37019	8.59973	0.150094	-221.165	0.300416
35.182	4.348	1	1	3	0	0	-2.16769	0.158184	0.938688	8.60098	-0.21529	17.2138	-2.16769	-21.6769	158.184	9.38688	8.60098	0.150115	-215.29	0.300438
35.193	4.359	1	1	3	0	0	-2.16541	0.158302	0.940974	8.59988	-0.209035	17.2127	-2.16541	-21.6541	158.302	9.40974	8.59988	0.150096	-209.035	0.300418
35.203	4.369	1	1	3	0	0	-2.1643	0.158725	0.94208	8.60125	-0.204124	17.2141	-2.1643	-21.643	158.725	9.4208	8.60125	0.15012	-204.124	0.300443
35.214	4.38	1	1	3	0	0	-2.16229	0.159148	0.944096	8.59908	-0.210226	17.2119	-2.16229	-21.6229	159.148	9.44096	8.59908	0.150082	-210.226	0.300405
35.224	4.39	1	1	3	0	0	-2.16126	0.158876	0.94512	8.59996	-0.193862	17.2128	-2.16126	-21.6126	158.876	9.4512	8.59996	0.150098	-193.862	0.30042
35.235	4.401	1	1	3	0	0	-2.15877	0.159615	0.947613	8.5959	-0.203774	17.2087	-2.15877	-21.5877	159.615	9.47613	8.5959	0.150027	-203.774	0.300349
35.246	4.412	1	1	3	0	0	-2.15668	0.160107	0.949702	8.59961	-0.208464	17.2124	-2.15668	-21.5668	160.107	9.49702	8.59961	0.150091	-208.464	0.300414
35.257	4.423	1	1	3	0	0	-2.15464	0.160138	0.951746	8.59639	-0.199183	17.2092	-2.15464	-21.5464	160.138	9.51746	8.59639	0.150035	-199.183	0.300358
35.267	4.433	1	1	3	0	0	-2.15326	0.160603	0.953125	8.59784	-0.197743	17.2107	-2.15326	-21.5326	160.603	9.53125	8.59784	0.150061	-197.743	0.300383
35.278	4.444	1	1	3	0	0	-2.15164	0.160231	0.954742	8.59792	-0.210176	17.2108	-2.15164	-21.5164	160.231	9.54742	8.59792	0.150062	-210.176	0.300384
35.288	4.454	1	1	3	0	0	-2.14952	0.161022	0.956866	8.59947	-0.193111	17.2123	-2.14952	-21.4952	161.022	9.56866	8.59947	0.150089	-193.111	0.300412
35.299	4.465	1	1	3	0	0	-2.14795	0.16148	0.958429	8.59717	-0.20304	17.21	-2.14795	-21.4795	161.48	9.58429	8.59717	0.150049	-203.04	0.300371
35.31	4.476	1	1	3	0	0	-2.14586	0.16145	0.960526	8.6009	-0.210165	17.2137	-2.14586	-21.4586	161.45	9.60526	8.6009	0.150114	-210.165	0.300436
35.321	4.487	1	1	3	0	0	-2.14387	0.162144	0.962511	8.59655	-0.208206	17.2094	-2.14387	-21.4387	162.144	9.62511	8.59655	0.150038	-208.206	0.30036
35.331	4.497	1	1	3	0	0	-2.14203	0.16243	0.964349	8.60082	-0.206436	17.2137	-2.14203	-21.4203	162.43	9.64349	8.60082	0.150113	-206.436	0.300435
35.342	4.508	1	1	3	0	0	-2.14063	0.162226	0.965755	8.59913	-0.214868	17.212	-2.14063	-21.4063	162.226	9.65755	8.59913	0.150083	-214.868	0.300406
35.352	4.518	1	1	3	0	0	-2.13829	0.163018	0.968089	8.59769	-0.212307	17.2105	-2.13829	-21.3829	163.018	9.68089	8.59769	0.150058	-212.307	0.30038
35.363	4.529	1	1	3	0	0	-2.13678	0.163063	0.969607	8.60167	-0.216545	17.2145	-2.13678	-21.3678	163.063	9.69607	8.60167	0.150128	-216.545	0.30045
35.374	4.54	1	1	3	0	0	-2.13503	0.162993	0.971351	8.59644	-0.203578	17.2093	-2.13503	-21.3503	162.993	9.71351	8.59644	0.150036	-203.578	0.300359
35.385	4.551	1	1	3	0	0	-2.13282	0.163873	0.973561	8.59863	-0.204809	17.2115	-2.13282	-21.3282	163.873	9.73561	8.59863	0.150074	-204.809	0.300397
35.395	4.561	1	1	3	0	0	-2.1309	0.164085	0.975487	8.60105	-0.209956	17.2139	-2.1309	-21.309	164.085	9.75487	8.60105	0.150117	-209.956	0.300439
35.406	4.572	1	1	3	0	0	-2.12937	0.163959	0.977012	8.60046	-0.196653	17.2133	-2.12937	-21.2937	163.959	9.77012	8.60046	0.150106	-196.653	0.300429
35.416	4.582	1	1	3	0	0	-2.12771	0.164033	0.978673	8.60028	-0.199131	17.2131	-2.12771	-21.2771	164.033	9.78673	8.60028	0.150103	-199.131	0.300426
35.427	4.593	1	1	3	0	0	-2.12553	0.164791	0.98085	8.60012	-0.197133	17.213	-2.12553	-21.2553	164.791	9.8085	8.60012	0.1501	-197.133	0.300423
35.438	4.604	1	1	3	0	0	-2.12377	0.164806	0.982611	8.59777	-0.197179	17.2106	-2.12377	-21.2377	164.806	9.82611	8.59777	0.150059	-197.179	0.300382
35.449	4.615	1	1	3	0	0	-2.122	0.165116	0.984386	8.60108	-0.198765	17.2139	-2.122	-21.22	165.116	9.84386	8.60108	0.150117	-198.765	0.30044
35.459	4.625	1	1	3	0	0	-2.12023	0.165353	0.986156	8.59791	-0.183944	17.2107	-2.12023	-21.2023	165.353	9.86156	8.59791	0.150062	-183.944	0.300384
35.47	4.636	1	1	3	0	0	-2.1179	0.165659	0.988487	8.59922	-0.187779	17.2121	-2.1179	-21.179	165.659	9.88487	8.59922	0.150085	-187.779	0.300407
35.486	4.652	1	1	3	0	0	-2.11532	0.166324	0.991063	8.59986	-0.215246	17.2127	-2.11532	-21.1532	166.324	9.91063	8.59986	0.150096	-215.246	0.300418
35.497	4.663	1	1	3	0	0	-2.11376	0.165821	0.992622	8.5991	-0.210163	17.2119	-2.11376	-21.1376	165.821	9.92622	8.5991	0.150083	-210.163	0.300405
35.508	4.674	1	1	3	0	0	-2.11149	0.166518	0.994888	8.59903	-0.198284	17.2119	-2.11149	-21.1149	166.518	9.94888	8.59903	0.150081	-198.284	0.300404
35.519	4.685	1	1	3	0	0	-2.11008	0.166808	0.996307	8.59824	-0.188901	17.2111	-2.11008	-21.1008	166.808	9.96307	8.59824	0.150068	-188.901	0.30039
35.529	4.695	1	1	3	0	0	-2.1085	0.166714	0.997878	8.60015	-0.200199	17.213	-2.1085	-21.085	166.714	9.97878	8.60015	0.150101	-200.199	0.300423
35.54	4.706	1	1	3	0	0	-2.10691	0.166937	0.999476	8.59951	-0.201913	17.2123	-2.10691	-21.0691	166.937	9.99476	8.59951	0.15009	-201.913	0.300412
35.55	4.716	1	1	3	0	0	-2.10522	0.167425	1.00117	8.59719	-0.205276	17.21	-2.10522	-21.0522	167.425	10.0117	8.59719	0.150049	-205.276	0.300372
35.561	4.727	1	1	3	0	0	-2.103	0.16762	1.00339	8.59755	-0.201692	17.2104	-2.103	-21.03	167.62	10.0339	8.59755	0.150056	-201.692	0.300378
35.572	4.738	1	1	3	0	0	-2.10087	0.168208	1.00552	8.60219	-0.189597	17.215	-2.10087	-21.0087	168.208	10.0552	8.60219	0.150137	-189.597	0.300459
35.583	4.749	1	1	3	0	0	-2.09955	0.168378	1.00683	8.5999	-0.189231	17.2127	-2.09955	-20.9955	168.378	10.0683	8.5999	0.150097	-189.231	0.300419
35.593	4.759	1	1	3	0	0	-2.09767	0.168231	1.00871	8.59969	-0.206631	17.2125	-2.09767	-20.9767	168.231	10.0871	8.59969	0.150093	-206.631	0.300415
35.604	4.77	1	1	3	0	0	-2.09578	0.168697	1.0106	8.60008	-0.207073	17.2129	-2.09578	-20.9578	168.697	10.106	8.60008	0.1501	-207.073	0.300422
35.615	4.781	1	1	3	0	0	-2.09417	0.169117	1.01221	8.59532	-0.190494	17.2082	-2.09417	-20.9417	169.117	10.1221	8.59532	0.150017	-190.494	0.300339
35.626	4.792	1	1	3	0	0	-2.09222	0.168979	1.01417	8.59853	-0.188449	17.2114	-2.09222	-20.9222	168.979	10.1417	8.59853	0.150073	-188.449	0.300395
35.636	4.802	1	1	3	0	0	-2.09027	0.169422	1.01611	8.60026	-0.204996	17.2131	-2.09027	-20.9027	169.422	10.1611	8.60026	0.150103	-204.996	0.300425
35.647	4.813	1	1	3	0	0	-2.08854	0.169588	1.01784	8.60154	-0.198387	17.2144	-2.08854	-20.8854	169.588	10.1784	8.60154	0.150125	-198.387	0.300448
35.657	4.823	1	1	3	0	0	-2.08695	0.169685	1.01943	8.60097	-0.213779	17.2138	-2.08695	-20.8695	169.685	10.1943	8.60097	0.150115	-213.779	0.300438
35.668	4.834	1	1	3	0	0	-2.08532	0.170161	1.02106	8.60094	-0.204002	17.2138	-2.08532	-20.8532	170.161	10.2106	8.60094	0.150115	-204.002	0.300437
35.679	4.845	1	1	3	0	0	-2.08275	0.170287	1.02363	8.59762	-0.194805	17.2105	-2.08275	-20.8275	170.287	10.2363	8.59762	0.150057	-194.805	0.300379
35.69	4.856	1	1	3	0	0	-2.08109	0.17071	1.02529	8.59866	-0.190055	17.2115	-2.08109	-20.8109	170.71	10.2529	8.59866	0.150075	-190.055	0.300397
35.7	4.866	1	1	3	0	0	-2.0796	0.170683	1.02679	8.60052	-0.21709	17.2134	-2.0796	-20.796	170.683	10.2679	8.60052	0.150107	-217.09	0.30043
35.711	4.877	1	1	3	0	0	-2.07773	0.171002	1.02865	8.60233	-0.212694	17.2152	-2.07773	-20.7773	171.002	10.2865	8.60233	0.150139	-212.694	0.300461
35.727	4.893	1	1	3	0	0	-2.07462	0.17169	1.03176	8.59998	-0.200258	17.2128	-2.07462	-20.7462	171.69	10.3176	8.59998	0.150098	-200.258	0.30042
35.738	4.904	1	1	3	0	0	-2.07285	0.17203	1.03353	8.59753	-0.205033	17.2104	-2.07285	-20.7285	172.03	10.3353	8.59753	0.150055	-205.033	0.300378
35.749	4.915	1	1	3	0	0	-2.07084	0.171891	1.03554	8.5983	-0.214806	17.2111	-2.07084	-20.7084	171.891	10.3554	8.5983	0.150069	-214.806	0.300391
35.76	4.926	1	1	3	0	0	-2.06951	0.17207	1.03687	8.60133	-0.217862	17.2142	-2.06951	-20.6951	172.07	10.3687	8.60133	0.150122	-217.862	0.300444
35.77	4.936	1	1	3	0	0	-2.06778	0.172567	1.0386	8.59989	-0.203037	17.2127	-2.06778	-20.6778	172.567	10.386	8.59989	0.150096	-203.037	0.300419
35.781	4.947	1	1	3	0	0	-2.06584	0.172523	1.04054	8.60166	-0.20034	17.2145	-2.06584	-20.6584	172.523	10.4054	8.60166	0.150127	-200.34	0.30045
35.791	4.957	1	1	3	0	0	-2.06407	0.172973	1.04231	8.60022	-0.205753	17.2131	-2.06407	-20.6407	172.973	10.4231	8.60022	0.150102	-205.753	0.300425
35.802	4.968	1	1	3	0	0	-2.06253	0.172928	1.04385	8.59822	-0.19926	17.2111	-2.06253	-20.6253	172.928	10.4385	8.59822	0.150067	-199.26	0.30039
35.813	4.979	1	1	3	0	0	-2.06088	0.173173	1.0455	8.60021	-0.201137	17.213	-2.06088	-20.6088	173.173	10.455	8.60021	0.150102	-201.137	0.300424
35.824	4.99	1	1	3	0	0	-2.05891	0.173562	1.04747	8.60177	-0.211916	17.2146	-2.05891	-20.5891	173.562	10.4747	8.60177	0.150129	-211.916	0.300452
35.839	5.005	1	1	3	0	0	-2.05656	0.173286	1.04982	8.59573	-0.210678	17.2086	-2.05656	-20.5656	173.286	10.4982	8.59573	0.150024	-210.678	0.300346
35.849	5.015	1	1	3	0	0	-2.05489	0.173943	1.05149	8.59871	-0.203469	17.2116	-2.05489	-20.5489	173.943	10.5149	8.59871	0.150076	-203.469	0.300398
35.86	5.026	1	1	3	0	0	-2.05308	0.174226	1.0533	8.59615	-0.198835	17.209	-2.05308	-20.5308	174.226	10.533	8.59615	0.150031	-198.835	0.300354
35.871	5.037	1	1	3	0	0	-2.05094	0.174455	1.05544	8.59945	-0.208735	17.2123	-2.05094	-20.5094	174.455	10.5544	8.59945	0.150089	-208.735	0.300411
35.882	5.048	1	1	3	0	0	-2.04958	0.174519	1.0568	8.59728	-0.212335	17.2101	-2.04958	-20.4958	174.519	10.568	8.59728	0.150051	-212.335	0.300373
35.892	5.058	1	1	3	0	0	-2.04791	0.174971	1.05847	8.59721	-0.222341	17.2101	-2.04791	-20.4791	174.971	10.5847	8.59721	0.15005	-222.341	0.300372
35.903	5.069	1	1	3	0	0	-2.04554	0.17503	1.06084	8.6033	-0.221721	17.2161	-2.04554	-20.4554	175.03	10.6084	8.6033	0.150156	-221.721	0.300478
35.913	5.079	1	1	3	0	0	-2.04357	0.175634	1.06281	8.59475	-0.207589	17.2076	-2.04357	-20.4357	175.634	10.6281	8.59475	0.150007	-207.589	0.300329
35.924	5.09	1	1	3	0	0	-2.04206	0.175601	1.06432	8.5955	-0.204558	17.2083	-2.04206	-20.4206	175.601	10.6432	8.5955	0.15002	-204.558	0.300342
35.935	5.101	1	1	3	0	0	-2.03976	0.175887	1.06662	8.5993	-0.209027	17.2121	-2.03976	-20.3976	175.887	10.6662	8.5993	0.150086	-209.027	0.300408
35.946	5.112	1	1	3	0	0	-2.03816	0.176255	1.06823	8.59772	-0.208273	17.2106	-2.03816	-20.3816	176.255	10.6823	8.59772	0.150059	-208.273	0.300381
35.956	5.122	1	1	3	0	0	-2.03658	0.176093	1.0698	8.59835	-0.202018	17.2112	-2.03658	-20.3658	176.093	10.698	8.59835	0.150069	-202.018	0.300392
35.967	5.133	1	1	3	0	0	-2.03484	0.176269	1.07155	8.5987	-0.20126	17.2115	-2.03484	-20.3484	176.269	10.7155	8.5987	0.150076	-201.26	0.300398
35.977	5.143	1	1	3	0	0	-2.0327	0.176899	1.07368	8.59911	-0.210669	17.2119	-2.0327	-20.327	176.899	10.7368	8.59911	0.150083	-210.669	0.300405
35.988	5.154	1	1	3	0	0	-2.03064	0.176773	1.07575	8.59905	-0.210079	17.2119	-2.03064	-20.3064	176.773	10.7575	8.59905	0.150082	-210.079	0.300404
35.999	5.165	1	1	3	0	0	-2.02882	0.177204	1.07757	8.59532	-0.211608	17.2082	-2.02882	-20.2882	177.204	10.7757	8.59532	0.150017	-211.608	0.300339
36.01	5.176	1	1	3	0	0	-2.02667	0.177845	1.07972	8.59867	-0.202196	17.2115	-2.02667	-20.2667	177.845	10.7972	8.59867	0.150075	-202.196	0.300398
36.02	5.186	1	1	3	0	0	-2.02475	0.177638	1.08164	8.60205	-0.199737	17.2149	-2.02475	-20.2475	177.638	10.8164	8.60205	0.150134	-199.737	0.300457
36.031	5.197	1	1	3	0	0	-2.02275	0.178161	1.08363	8.59704	-0.192759	17.2099	-2.02275	-20.2275	178.161	10.8363	8.59704	0.150047	-192.759	0.300369
36.041	5.207	1	1	3	0	0	-2.0216	0.178072	1.08478	8.59819	-0.216317	17.211	-2.0216	-20.216	178.072	10.8478	8.59819	0.150067	-216.317	0.300389
36.055	5.221	1	1	3	0	0	-2.01945	0.177967	1.08693	8.59953	-0.214236	17.2124	-2.01945	-20.1945	177.967	10.8693	8.59953	0.15009	-214.236	0.300412
36.066	5.232	1	1	3	0	0	-2.01757	0.178489	1.08881	8.60055	-0.20268	17.2134	-2.01757	-20.1757	178.489	10.8881	8.60055	0.150108	-202.68	0.30043
36.077	5.243	1	1	3	0	0	-2.01536	0.179162	1.09102	8.60111	-0.196207	17.2139	-2.01536	-20.1536	179.162	10.9102	8.60111	0.150118	-196.207	0.30044
36.09	5.256	1	1	3	0	0	-2.01306	0.179038	1.09332	8.59956	-0.238186	17.2124	-2.01306	-20.1306	179.038	10.9332	8.59956	0.150091	-238.186	0.300413
36.101	5.267	1	1	3	0	0	-2.01146	0.179224	1.09492	8.59615	-0.232487	17.209	-2.01146	-20.1146	179.224	10.9492	8.59615	0.150031	-232.487	0.300354
36.111	5.277	1	1	3	0	0	-2.00937	0.179447	1.09702	8.59939	-0.231129	17.2122	-2.00937	-20.0937	179.447	10.9702	8.59939	0.150088	-231.129	0.30041
36.122	5.288	1	1	3	0	0	-2.00746	0.179734	1.09892	8.5983	-0.223209	17.2111	-2.00746	-20.0746	179.734	10.9892	8.5983	0.150069	-223.209	0.300391
36.133	5.299	1	1	3	0	0	-2.00525	0.18005	1.10114	8.59892	-0.212712	17.2118	-2.00525	-20.0525	180.05	11.0114	8.59892	0.150079	-212.712	0.300402
36.144	5.31	1	1	3	0	0	-2.00376	0.179815	1.10262	8.59829	-0.208541	17.2111	-2.00376	-20.0376	179.815	11.0262	8.59829	0.150069	-208.541	0.300391
36.154	5.32	1	1	3	0	0	-2.00173	0.180251	1.10465	8.59606	-0.222997	17.2089	-2.00173	-20.0173	180.251	11.0465	8.59606	0.150029	-222.997	0.300352
36.165	5.331	1	1	3	0	0	-1.99992	0.180492	1.10647	8.59762	-0.217494	17.2105	-1.99992	-19.9992	180.492	11.0647	8.59762	0.150057	-217.494	0.300379
36.175	5.341	1	1	3	0	0	-1.99822	0.180211	1.10816	8.60189	-0.232982	17.2147	-1.99822	-19.9822	180.211	11.0816	8.60189	0.150131	-232.982	0.300454
36.186	5.352	1	1	3	0	0	-1.99669	0.180582	1.10969	8.6013	-0.232766	17.2141	-1.99669	-19.9669	180.582	11.0969	8.6013	0.150121	-232.766	0.300443
36.197	5.363	1	1	3	0	0	-1.99446	0.180975	1.11192	8.60213	-0.226578	17.215	-1.99446	-19.9446	180.975	11.1192	8.60213	0.150136	-226.578	0.300458
36.208	5.374	1	1	3	0	0	-1.9927	0.18082	1.11368	8.59798	-0.209758	17.2108	-1.9927	-19.927	180.82	11.1368	8.59798	0.150063	-209.758	0.300386
36.218	5.384	1	1	3	0	0	-1.99135	0.180674	1.11504	8.60233	-0.215708	17.2152	-1.99135	-19.9135	180.674	11.1504	8.60233	0.150139	-215.708	0.300461
36.229	5.395	1	1	3	0	0	-1.98916	0.18151	1.11723	8.59924	-0.223788	17.2121	-1.98916	-19.8916	181.51	11.1723	8.59924	0.150085	-223.788	0.300407
36.24	5.406	1	1	3	0	0	-1.9876	0.18105	1.11879	8.60166	-0.230497	17.2145	-1.9876	-19.876	181.05	11.1879	8.60166	0.150127	-230.497	0.30045
36.251	5.417	1	1	3	0	0	-1.98502	0.181893	1.12136	8.59886	-0.221445	17.2117	-1.98502	-19.8502	181.893	11.2136	8.59886	0.150078	-221.445	0.300401
36.261	5.427	1	1	3	0	0	-1.98303	0.182094	1.12336	8.60235	-0.217732	17.2152	-1.98303	-19.8303	182.094	11.2336	8.60235	0.150139	-217.732	0.300462
36.272	5.438	1	1	3	0	0	-1.98145	0.181867	1.12494	8.60098	-0.208385	17.2138	-1.98145	-19.8145	181.867	11.2494	8.60098	0.150115	-208.385	0.300438
36.282	5.448	1	1	3	0	0	-1.97955	0.182165	1.12683	8.59956	-0.216314	17.2124	-1.97955	-19.7955	182.165	11.2683	8.59956	0.150091	-216.314	0.300413
36.293	5.459	1	1	3	0	0	-1.97733	0.182636	1.12905	8.60027	-0.215464	17.2131	-1.97733	-19.7733	182.636	11.2905	8.60027	0.150103	-215.464	0.300425
36.304	5.47	1	1	3	0	0	-1.9758	0.182159	1.13058	8.59989	-0.214451	17.2127	-1.9758	-19.758	182.159	11.3058	8.59989	0.150096	-214.451	0.300419
36.315	5.481	1	1	3	0	0	-1.97337	0.182829	1.13302	8.60243	-0.212444	17.2153	-1.97337	-19.7337	182.829	11.3302	8.60243	0.150141	-212.444	0.300463
36.325	5.491	1	1	3	0	0	-1.97189	0.182912	1.1345	8.60287	-0.207741	17.2157	-1.97189	-19.7189	182.912	11.345	8.60287	0.150148	-207.741	0.300471
36.336	5.502	1	1	3	0	0	-1.97018	0.182478	1.1362	8.59922	-0.209764	17.2121	-1.97018	-19.7018	182.478	11.362	8.59922	0.150085	-209.764	0.300407
36.346	5.512	1	1	3	0	0	-1.96811	0.182991	1.13827	8.59855	-0.215941	17.2114	-1.96811	-19.6811	182.991	11.3827	8.59855	0.150073	-215.941	0.300395
36.357	5.523	1	1	3	0	0	-1.96623	0.183118	1.14015	8.60054	-0.218731	17.2134	-1.96623	-19.6623	183.118	11.4015	8.60054	0.150108	-218.731	0.30043
36.368	5.534	1	1	3	0	0	-1.96434	0.182736	1.14205	8.60261	-0.214127	17.2154	-1.96434	-19.6434	182.736	11.4205	8.60261	0.150144	-214.127	0.300466
36.379	5.545	1	1	3	0	0	-1.96226	0.183186	1.14412	8.60308	-0.208955	17.2159	-1.96226	-19.6226	183.186	11.4412	8.60308	0.150152	-208.955	0.300475
36.389	5.555	1	1	3	0	0	-1.96057	0.182893	1.14582	8.60192	-0.214917	17.2148	-1.96057	-19.6057	182.893	11.4582	8.60192	0.150132	-214.917	0.300454
36.4	5.566	1	1	3	0	0	-1.95845	0.182901	1.14793	8.59824	-0.20849	17.2111	-1.95845	-19.5845	182.901	11.4793	8.59824	0.150068	-208.49	0.30039
36.41	5.576	1	1	3	0	0	-1.95665	0.183176	1.14973	8.59954	-0.217129	17.2124	-1.95665	-19.5665	183.176	11.4973	8.59954	0.15009	-217.129	0.300413
36.421	5.587	1	1	3	0	0	-1.95534	0.182846	1.15105	8.59695	-0.221472	17.2098	-1.95534	-19.5534	182.846	11.5105	8.59695	0.150045	-221.472	0.300367
36.432	5.598	1	1	3	0	0	-1.95251	0.183145	1.15387	8.59782	-0.225077	17.2107	-1.95251	-19.5251	183.145	11.5387	8.59782	0.15006	-225.077	0.300383
36.443	5.609	1	1	3	0	0	-1.9504	0.183377	1.15598	8.59736	-0.220592	17.2102	-1.9504	-19.504	183.377	11.5598	8.59736	0.150052	-220.592	0.300375
36.453	5.619	1	1	3	0	0	-1.94838	0.183156	1.158	8.59743	-0.221813	17.2103	-1.94838	-19.4838	183.156	11.58	8.59743	0.150053	-221.813	0.300376
36.464	5.63	1	1	3	0	0	-1.94668	0.183344	1.1597	8.59731	-0.219024	17.2101	-1.94668	-19.4668	183.344	11.597	8.59731	0.150051	-219.024	0.300374
36.474	5.64	1	1	3	0	0	-1.94447	0.183905	1.16191	8.60108	-0.241479	17.2139	-1.94447	-19.4447	183.905	11.6191	8.60108	0.150117	-241.479	0.30044
36.485	5.651	1	1	3	0	0	-1.94236	0.183495	1.16403	8.59811	-0.23282	17.211	-1.94236	-19.4236	183.495	11.6403	8.59811	0.150065	-232.82	0.300388
36.496	5.662	1	1	3	0	0	-1.94025	0.183676	1.16614	8.60008	-0.229008	17.2129	-1.94025	-19.4025	183.676	11.6614	8.60008	0.1501	-229.008	0.300422
36.507	5.673	1	1	3	0	0	-1.93826	0.183783	1.16813	8.59978	-0.225045	17.2126	-1.93826	-19.3826	183.783	11.6813	8.59978	0.150095	-225.045	0.300417
36.517	5.683	1	1	3	0	0	-1.93662	0.183388	1.16976	8.59949	-0.229006	17.2123	-1.93662	-19.3662	183.388	11.6976	8.59949	0.150089	-229.006	0.300412
36.528	5.694	1	1	3	0	0	-1.93435	0.183848	1.17203	8.59836	-0.220948	17.2112	-1.93435	-19.3435	183.848	11.7203	8.59836	0.15007	-220.948	0.300392
36.538	5.704	1	1	3	0	0	-1.93246	0.184076	1.17392	8.60264	-0.237106	17.2155	-1.93246	-19.3246	184.076	11.7392	8.60264	0.150144	-237.106	0.300467
36.552	5.718	1	1	3	0	0	-1.93025	0.18356	1.17613	8.60076	-0.23227	17.2136	-1.93025	-19.3025	183.56	11.7613	8.60076	0.150111	-232.27	0.300434
36.563	5.729	1	1	3	0	0	-1.92858	0.183634	1.1778	8.59806	-0.229216	17.2109	-1.92858	-19.2858	183.634	11.778	8.59806	0.150064	-229.216	0.300387
36.574	5.74	1	1	3	0	0	-1.92648	0.183589	1.17991	8.59547	-0.213894	17.2083	-1.92648	-19.2648	183.589	11.7991	8.59547	0.150019	-213.894	0.300342
36.584	5.75	1	1	3	0	0	-1.92482	0.183411	1.18156	8.59686	-0.244022	17.2097	-1.92482	-19.2482	183.411	11.8156	8.59686	0.150043	-244.022	0.300366
36.598	5.764	1	1	3	0	0	-1.92251	0.183671	1.18387	8.60033	-0.233916	17.2132	-1.92251	-19.2251	183.671	11.8387	8.60033	0.150104	-233.916	0.300426
36.608	5.774	1	1	3	0	0	-1.92083	0.183283	1.18555	8.60142	-0.228305	17.2143	-1.92083	-19.2083	183.283	11.8555	8.60142	0.150123	-228.305	0.300445
36.619	5.785	1	1	3	0	0	-1.91914	0.183511	1.18724	8.59678	-0.224918	17.2096	-1.91914	-19.1914	183.511	11.8724	8.59678	0.150042	-224.918	0.300365
36.63	5.796	1	1	3	0	0	-1.91669	0.183996	1.18969	8.59981	-0.230789	17.2126	-1.91669	-19.1669	183.996	11.8969	8.59981	0.150095	-230.789	0.300417
36.641	5.807	1	1	3	0	0	-1.9152	0.183514	1.19118	8.60187	-0.21902	17.2147	-1.9152	-19.152	183.514	11.9118	8.60187	0.150131	-219.02	0.300453
36.651	5.817	1	1	3	0	0	-1.91335	0.183598	1.19303	8.59668	-0.232269	17.2095	-1.91335	-19.1335	183.598	11.9303	8.59668	0.15004	-232.269	0.300363
36.662	5.828	1	1	3	0	0	-1.91126	0.184051	1.19512	8.59852	-0.219323	17.2114	-1.91126	-19.1126	184.051	11.9512	8.59852	0.150072	-219.323	0.300395
36.672	5.838	1	1	3	0	0	-1.90948	0.183546	1.1969	8.59954	-0.240355	17.2124	-1.90948	-19.0948	183.546	11.969	8.59954	0.15009	-240.355	0.300413
36.683	5.849	1	1	3	0	0	-1.90837	0.183218	1.19801	8.5976	-0.232764	17.2104	-1.90837	-19.0837	183.218	11.9801	8.5976	0.150056	-232.764	0.300379
36.694	5.86	1	1	3	0	0	-1.90567	0.183992	1.20071	8.60209	-0.217447	17.2149	-1.90567	-19.0567	183.992	12.0071	8.60209	0.150135	-217.447	0.300457
36.705	5.871	1	1	3	0	0	-1.90368	0.183727	1.20271	8.59818	-0.20228	17.211	-1.90368	-19.0368	183.727	12.0271	8.59818	0.150066	-202.28	0.300389
36.715	5.881	1	1	3	0	0	-1.90213	0.184101	1.20425	8.60008	-0.228304	17.2129	-1.90213	-19.0213	184.101	12.0425	8.60008	0.1501	-228.304	0.300422
36.726	5.892	1	1	3	0	0	-1.9003	0.183773	1.20608	8.59861	-0.219898	17.2114	-1.9003	-19.003	183.773	12.0608	8.59861	0.150074	-219.898	0.300396
36.736	5.902	1	1	3	0	0	-1.89887	0.183321	1.20752	8.59738	-0.246786	17.2102	-1.89887	-18.9887	183.321	12.0752	8.59738	0.150053	-246.786	0.300375
36.747	5.913	1	1	3	0	0	-1.89681	0.183892	1.20957	8.59956	-0.235365	17.2124	-1.89681	-18.9681	183.892	12.0957	8.59956	0.150091	-235.365	0.300413
36.759	5.925	1	1	3	0	0	-1.89453	0.183686	1.21185	8.59759	-0.187573	17.2104	-1.89453	-18.9453	183.686	12.1185	8.59759	0.150056	-187.573	0.300379
36.77	5.936	1	1	3	0	0	-1.89285	0.183505	1.21353	8.5993	-0.200299	17.2121	-1.89285	-18.9285	183.505	12.1353	8.5993	0.150086	-200.299	0.300409
36.781	5.947	1	1	3	0	0	-1.89112	0.184044	1.21527	8.59933	-0.213214	17.2122	-1.89112	-18.9112	184.044	12.1527	8.59933	0.150087	-213.214	0.300409
36.791	5.957	1	1	3	0	0	-1.88992	0.183802	1.21647	8.60074	-0.19865	17.2136	-1.88992	-18.8992	183.802	12.1647	8.60074	0.150111	-198.65	0.300434
36.802	5.968	1	1	3	0	0	-1.88796	0.183655	1.21843	8.59831	-0.197565	17.2112	-1.88796	-18.8796	183.655	12.1843	8.59831	0.150069	-197.565	0.300391
36.813	5.979	1	1	3	0	0	-1.88539	0.184001	1.22099	8.59997	-0.207671	17.2128	-1.88539	-18.8539	184.001	12.2099	8.59997	0.150098	-207.671	0.30042
36.831	5.997	1	1	3	0	0	-1.88241	0.184136	1.22398	8.59844	-0.220827	17.2113	-1.88241	-18.8241	184.136	12.2398	8.59844	0.150071	-220.827	0.300394
36.842	6.008	1	1	3	0	0	-1.88111	0.184044	1.22527	8.6005	-0.230132	17.2133	-1.88111	-18.8111	184.044	12.2527	8.6005	0.150107	-230.132	0.300429
36.852	6.018	1	1	3	0	0	-1.87958	0.183421	1.2268	8.60132	-0.213897	17.2142	-1.87958	-18.7958	183.421	12.268	8.60132	0.150121	-213.897	0.300444
36.863	6.029	1	1	3	0	0	-1.87796	0.1838	1.22843	8.60133	-0.225392	17.2142	-1.87796	-18.7796	183.8	12.2843	8.60133	0.150122	-225.392	0.300444
36.874	6.04	1	1	3	0	0	-1.87552	0.184179	1.23087	8.60015	-0.234652	17.213	-1.87552	-18.7552	184.179	12.3087	8.60015	0.150101	-234.652	0.300423
36.885	6.051	1	1	3	0	0	-1.87423	0.183861	1.23216	8.60154	-0.236872	17.2144	-1.87423	-18.7423	183.861	12.3216	8.60154	0.150125	-236.872	0.300448
36.895	6.061	1	1	3	0	0	-1.87301	0.183885	1.23337	8.59923	-0.22889	17.2121	-1.87301	-18.7301	183.885	12.3337	8.59923	0.150085	-228.89	0.300407
36.906	6.072	1	1	3	0	0	-1.87077	0.184724	1.23561	8.59952	-0.235468	17.2124	-1.87077	-18.7077	184.724	12.3561	8.59952	0.15009	-235.468	0.300412
36.916	6.082	1	1	3	0	0	-1.86929	0.184172	1.23709	8.6026	-0.214965	17.2154	-1.86929	-18.6929	184.172	12.3709	8.6026	0.150144	-214.965	0.300466
36.927	6.093	1	1	3	0	0	-1.8677	0.184202	1.23869	8.60094	-0.222183	17.2138	-1.8677	-18.677	184.202	12.3869	8.60094	0.150115	-222.183	0.300437
36.938	6.104	1	1	3	0	0	-1.86596	0.184748	1.24042	8.59855	-0.231447	17.2114	-1.86596	-18.6596	184.748	12.4042	8.59855	0.150073	-231.447	0.300395
36.949	6.115	1	1	3	0	0	-1.86451	0.183966	1.24187	8.59905	-0.226123	17.2119	-1.86451	-18.6451	183.966	12.4187	8.59905	0.150082	-226.123	0.300404
36.959	6.125	1	1	3	0	0	-1.86323	0.184109	1.24316	8.59893	-0.231264	17.2118	-1.86323	-18.6323	184.109	12.4316	8.59893	0.15008	-231.264	0.300402
36.97	6.136	1	1	3	0	0	-1.86103	0.184723	1.24535	8.60393	-0.232389	17.2168	-1.86103	-18.6103	184.723	12.4535	8.60393	0.150167	-232.389	0.300489
36.98	6.146	1	1	3	0	0	-1.85936	0.184583	1.24703	8.59914	-0.210787	17.212	-1.85936	-18.5936	184.583	12.4703	8.59914	0.150083	-210.787	0.300406
36.991	6.157	1	1	3	0	0	-1.85776	0.184693	1.24863	8.60217	-0.217891	17.215	-1.85776	-18.5776	184.693	12.4863	8.60217	0.150136	-217.891	0.300459
37.002	6.168	1	1	3	0	0	-1.85652	0.184812	1.24986	8.60209	-0.216207	17.2149	-1.85652	-18.5652	184.812	12.4986	8.60209	0.150135	-216.207	0.300457
37.013	6.179	1	1	3	0	0	-1.8548	0.184648	1.25158	8.59988	-0.218735	17.2127	-1.8548	-18.548	184.648	12.5158	8.59988	0.150096	-218.735	0.300419
37.023	6.189	1	1	3	0	0	-1.85337	0.184859	1.25301	8.59804	-0.215409	17.2109	-1.85337	-18.5337	184.859	12.5301	8.59804	0.150064	-215.409	0.300386
37.034	6.2	1	1	3	0	0	-1.85086	0.185589	1.25552	8.60151	-0.209823	17.2143	-1.85086	-18.5086	185.589	12.5552	8.60151	0.150125	-209.823	0.300447
37.044	6.21	1	1	3	0	0	-1.84924	0.185542	1.25714	8.59707	-0.23522	17.2099	-1.84924	-18.4924	185.542	12.5714	8.59707	0.150047	-235.22	0.30037
37.055	6.221	1	1	3	0	0	-1.8478	0.185415	1.25858	8.59978	-0.232034	17.2126	-1.8478	-18.478	185.415	12.5858	8.59978	0.150095	-232.034	0.300417
37.066	6.232	1	1	3	0	0	-1.84564	0.186036	1.26074	8.60035	-0.238099	17.2132	-1.84564	-18.4564	186.036	12.6074	8.60035	0.150104	-238.099	0.300427
37.077	6.243	1	1	3	0	0	-1.84367	0.185736	1.26271	8.59537	-0.221877	17.2082	-1.84367	-18.4367	185.736	12.6271	8.59537	0.150018	-221.877	0.30034
37.087	6.253	1	1	3	0	0	-1.84243	0.186184	1.26395	8.59978	-0.217963	17.2126	-1.84243	-18.4243	186.184	12.6395	8.59978	0.150094	-217.963	0.300417
37.098	6.264	1	1	3	0	0	-1.84091	0.186452	1.26548	8.59858	-0.227357	17.2114	-1.84091	-18.4091	186.452	12.6548	8.59858	0.150074	-227.357	0.300396
37.108	6.274	1	1	3	0	0	-1.83931	0.186349	1.26707	8.5958	-0.224542	17.2086	-1.83931	-18.3931	186.349	12.6707	8.5958	0.150025	-224.542	0.300347
37.119	6.285	1	1	3	0	0	-1.83773	0.18683	1.26865	8.59888	-0.229145	17.2117	-1.83773	-18.3773	186.83	12.6865	8.59888	0.150079	-229.145	0.300401
37.13	6.296	1	1	3	0	0	-1.83546	0.186829	1.27092	8.59781	-0.237043	17.2107	-1.83546	-18.3546	186.829	12.7092	8.59781	0.15006	-237.043	0.300383
37.141	6.307	1	1	3	0	0	-1.8336	0.18766	1.27278	8.59613	-0.227505	17.209	-1.8336	-18.336	187.66	12.7278	8.59613	0.150031	-227.505	0.300353
37.151	6.317	1	1	3	0	0	-1.83205	0.187894	1.27433	8.60126	-0.231499	17.2141	-1.83205	-18.3205	187.894	12.7433	8.60126	0.15012	-231.499	0.300443
37.162	6.328	1	1	3	0	0	-1.83066	0.186883	1.27573	8.602	-0.231643	17.2148	-1.83066	-18.3066	186.883	12.7573	8.602	0.150133	-231.643	0.300456
37.172	6.338	1	1	3	0	0	-1.82889	0.187216	1.27749	8.59858	-0.222302	17.2114	-1.82889	-18.2889	187.216	12.7749	8.59858	0.150074	-222.302	0.300396
37.183	6.349	1	1	3	0	0	-1.82734	0.187597	1.27904	8.60174	-0.225222	17.2146	-1.82734	-18.2734	187.597	12.7904	8.60174	0.150129	-225.222	0.300451
37.194	6.36	1	1	3	0	0	-1.82556	0.187365	1.28083	8.59879	-0.219571	17.2116	-1.82556	-18.2556	187.365	12.8083	8.59879	0.150077	-219.571	0.3004
37.205	6.371	1	1	3	0	0	-1.8244	0.187549	1.28199	8.59802	-0.214831	17.2109	-1.8244	-18.244	187.549	12.8199	8.59802	0.150064	-214.831	0.300386
37.215	6.381	1	1	3	0	0	-1.82258	0.188199	1.28381	8.59972	-0.218802	17.2126	-1.82258	-18.2258	188.199	12.8381	8.59972	0.150093	-218.802	0.300416
37.226	6.392	1	1	3	0	0	-1.82023	0.188188	1.28616	8.59971	-0.216699	17.2126	-1.82023	-18.2023	188.188	12.8616	8.59971	0.150093	-216.699	0.300416
37.236	6.402	1	1	3	0	0	-1.81927	0.188548	1.28711	8.60184	-0.231513	17.2147	-1.81927	-18.1927	188.548	12.8711	8.60184	0.150131	-231.513	0.300453
37.247	6.413	1	1	3	0	0	-1.81757	0.188403	1.28881	8.59824	-0.223397	17.2111	-1.81757	-18.1757	188.403	12.8881	8.59824	0.150068	-223.397	0.30039
37.258	6.424	1	1	3	0	0	-1.81579	0.188545	1.29059	8.60245	-0.228395	17.2153	-1.81579	-18.1579	188.545	12.9059	8.60245	0.150141	-228.395	0.300463
37.269	6.435	1	1	3	0	0	-1.81384	0.188762	1.29254	8.60068	-0.222262	17.2135	-1.81384	-18.1384	188.762	12.9254	8.60068	0.15011	-222.262	0.300433
37.279	6.445	1	1	3	0	0	-1.81231	0.189253	1.29408	8.59793	-0.209982	17.2108	-1.81231	-18.1231	189.253	12.9408	8.59793	0.150062	-209.982	0.300385
37.294	6.46	1	1	3	0	0	-1.81002	0.189037	1.29636	8.59814	-0.206141	17.211	-1.81002	-18.1002	189.037	12.9636	8.59814	0.150066	-206.141	0.300388
37.305	6.471	1	1	3	0	0	-1.80833	0.189708	1.29806	8.59932	-0.224942	17.2122	-1.80833	-18.0833	189.708	12.9806	8.59932	0.150086	-224.942	0.300409
37.316	6.482	1	1	3	0	0	-1.80592	0.189823	1.30047	8.59837	-0.233521	17.2112	-1.80592	-18.0592	189.823	13.0047	8.59837	0.15007	-233.521	0.300392
37.327	6.493	1	1	3	0	0	-1.80383	0.190209	1.30255	8.60032	-0.235705	17.2132	-1.80383	-18.0383	190.209	13.0255	8.60032	0.150104	-235.705	0.300426
37.337	6.503	1	1	3	0	0	-1.80244	0.190536	1.30394	8.59562	-0.212553	17.2085	-1.80244	-18.0244	190.536	13.0394	8.59562	0.150022	-212.553	0.300344
37.348	6.514	1	1	3	0	0	-1.80076	0.190081	1.30563	8.59929	-0.22589	17.2121	-1.80076	-18.0076	190.081	13.0563	8.59929	0.150086	-225.89	0.300408
37.358	6.524	1	1	3	0	0	-1.79944	0.190356	1.30694	8.59639	-0.213597	17.2092	-1.79944	-17.9944	190.356	13.0694	8.59639	0.150035	-213.597	0.300358
37.369	6.535	1	1	3	0	0	-1.79774	0.190749	1.30864	8.59655	-0.228642	17.2094	-1.79774	-17.9774	190.749	13.0864	8.59655	0.150038	-228.642	0.300361
37.38	6.546	1	1	3	0	0	-1.79616	0.190437	1.31022	8.59816	-0.224297	17.211	-1.79616	-17.9616	190.437	13.1022	8.59816	0.150066	-224.297	0.300389
37.391	6.557	1	1	3	0	0	-1.79368	0.191246	1.3127	8.59867	-0.225876	17.2115	-1.79368	-17.9368	191.246	13.127	8.59867	0.150075	-225.876	0.300398
37.401	6.567	1	1	3	0	0	-1.79202	0.19172	1.31436	8.59838	-0.221715	17.2112	-1.79202	-17.9202	191.72	13.1436	8.59838	0.15007	-221.715	0.300392
37.412	6.578	1	1	3	0	0	-1.78994	0.191554	1.31644	8.5985	-0.218679	17.2113	-1.78994	-17.8994	191.554	13.1644	8.5985	0.150072	-218.679	0.300395
37.422	6.588	1	1	3	0	0	-1.78903	0.192327	1.31736	8.59941	-0.224515	17.2123	-1.78903	-17.8903	192.327	13.1736	8.59941	0.150088	-224.515	0.30041
37.433	6.599	1	1	3	0	0	-1.78661	0.192116	1.31977	8.59828	-0.223018	17.2111	-1.78661	-17.8661	192.116	13.1977	8.59828	0.150068	-223.018	0.300391
37.444	6.61	1	1	3	0	0	-1.78522	0.191565	1.32116	8.59932	-0.220972	17.2122	-1.78522	-17.8522	191.565	13.2116	8.59932	0.150086	-220.972	0.300409
37.455	6.621	1	1	3	0	0	-1.78355	0.191865	1.32283	8.59664	-0.222463	17.2095	-1.78355	-17.8355	191.865	13.2283	8.59664	0.15004	-222.463	0.300362
37.465	6.631	1	1	3	0	0	-1.78202	0.192255	1.32437	8.59667	-0.232765	17.2095	-1.78202	-17.8202	192.255	13.2437	8.59667	0.15004	-232.765	0.300363
37.476	6.642	1	1	3	0	0	-1.78006	0.192232	1.32633	8.59976	-0.229334	17.2126	-1.78006	-17.8006	192.232	13.2633	8.59976	0.150094	-229.334	0.300417
37.486	6.652	1	1	3	0	0	-1.77852	0.192406	1.32786	8.59709	-0.240586	17.2099	-1.77852	-17.7852	192.406	13.2786	8.59709	0.150048	-240.586	0.30037
37.497	6.663	1	1	3	0	0	-1.7765	0.192975	1.32988	8.59575	-0.238036	17.2086	-1.7765	-17.765	192.975	13.2988	8.59575	0.150024	-238.036	0.300347
37.508	6.674	1	1	3	0	0	-1.77488	0.192786	1.3315	8.59687	-0.236418	17.2097	-1.77488	-17.7488	192.786	13.315	8.59687	0.150044	-236.418	0.300366
37.519	6.685	1	1	3	0	0	-1.77289	0.19322	1.33349	8.59904	-0.219901	17.2119	-1.77289	-17.7289	193.22	13.3349	8.59904	0.150082	-219.901	0.300404
37.529	6.695	1	1	3	0	0	-1.77121	0.193419	1.33518	8.59956	-0.23211	17.2124	-1.77121	-17.7121	193.419	13.3518	8.59956	0.150091	-232.11	0.300413
37.54	6.706	1	1	3	0	0	-1.76949	0.193213	1.3369	8.59632	-0.226466	17.2092	-1.76949	-17.6949	193.213	13.369	8.59632	0.150034	-226.466	0.300357
37.55	6.716	1	1	3	0	0	-1.76778	0.193539	1.3386	8.60004	-0.233267	17.2129	-1.76778	-17.6778	193.539	13.386	8.60004	0.150099	-233.267	0.300421
37.561	6.727	1	1	3	0	0	-1.76593	0.193993	1.34046	8.59733	-0.224682	17.2102	-1.76593	-17.6593	193.993	13.4046	8.59733	0.150052	-224.682	0.300374
37.572	6.738	1	1	3	0	0	-1.76393	0.193632	1.34245	8.59865	-0.214753	17.2115	-1.76393	-17.6393	193.632	13.4245	8.59865	0.150075	-214.753	0.300397
37.583	6.749	1	1	3	0	0	-1.76184	0.194166	1.34455	8.60029	-0.212267	17.2131	-1.76184	-17.6184	194.166	13.4455	8.60029	0.150103	-212.267	0.300426
37.593	6.759	1	1	3	0	0	-1.76028	0.194354	1.3461	8.60006	-0.21574	17.2129	-1.76028	-17.6028	194.354	13.461	8.60006	0.150099	-215.74	0.300422
37.604	6.77	1	1	3	0	0	-1.75861	0.194141	1.34777	8.59937	-0.216715	17.2122	-1.75861	-17.5861	194.141	13.4777	8.59937	0.150087	-216.715	0.30041
37.614	6.78	1	1	3	0	0	-1.75635	0.194798	1.35003	8.59794	-0.215895	17.2108	-1.75635	-17.5635	194.798	13.5003	8.59794	0.150062	-215.895	0.300385
37.626	6.792	1	1	3	0	0	-1.75429	0.194584	1.35209	8.60219	-0.232148	17.215	-1.75429	-17.5429	194.584	13.5209	8.60219	0.150136	-232.148	0.300459
37.636	6.802	1	1	3	0	0	-1.75319	0.194364	1.3532	8.59888	-0.215801	17.2117	-1.75319	-17.5319	194.364	13.532	8.59888	0.150079	-215.801	0.300401
37.647	6.813	1	1	3	0	0	-1.75075	0.194948	1.35563	8.60234	-0.224702	17.2152	-1.75075	-17.5075	194.948	13.5563	8.60234	0.150139	-224.702	0.300462
37.657	6.823	1	1	3	0	0	-1.74876	0.195064	1.35762	8.59906	-0.210993	17.2119	-1.74876	-17.4876	195.064	13.5762	8.59906	0.150082	-210.993	0.300404
37.668	6.834	1	1	3	0	0	-1.74742	0.194913	1.35896	8.59481	-0.2115	17.2076	-1.74742	-17.4742	194.913	13.5896	8.59481	0.150008	-211.5	0.30033
37.679	6.845	1	1	3	0	0	-1.74595	0.195362	1.36044	8.60148	-0.240201	17.2143	-1.74595	-17.4595	195.362	13.6044	8.60148	0.150124	-240.201	0.300447
37.69	6.856	1	1	3	0	0	-1.74309	0.195452	1.36329	8.60054	-0.244959	17.2134	-1.74309	-17.4309	195.452	13.6329	8.60054	0.150108	-244.959	0.30043
37.7	6.866	1	1	3	0	0	-1.74162	0.195805	1.36477	8.59927	-0.227311	17.2121	-1.74162	-17.4162	195.805	13.6477	8.59927	0.150086	-227.311	0.300408
37.718	6.884	1	1	3	0	0	-1.73858	0.195776	1.3678	8.60199	-0.23446	17.2148	-1.73858	-17.3858	195.776	13.678	8.60199	0.150133	-234.46	0.300456
37.729	6.895	1	1	3	0	0	-1.73638	0.196093	1.37	8.59963	-0.23681	17.2125	-1.73638	-17.3638	196.093	13.7	8.59963	0.150092	-236.81	0.300414
37.739	6.905	1	1	3	0	0	-1.73506	0.196082	1.37132	8.59708	-0.227886	17.2099	-1.73506	-17.3506	196.082	13.7132	8.59708	0.150047	-227.886	0.30037
37.75	6.916	1	1	3	0	0	-1.73294	0.196236	1.37345	8.59963	-0.244756	17.2125	-1.73294	-17.3294	196.236	13.7345	8.59963	0.150092	-244.756	0.300414
37.761	6.927	1	1	3	0	0	-1.73119	0.196275	1.37519	8.59954	-0.244407	17.2124	-1.73119	-17.3119	196.275	13.7519	8.59954	0.15009	-244.407	0.300413
37.772	6.938	1	1	3	0	0	-1.7292	0.196595	1.37718	8.60094	-0.24112	17.2138	-1.7292	-17.292	196.595	13.7718	8.60094	0.150115	-241.12	0.300437
37.782	6.948	1	1	3	0	0	-1.72778	0.196081	1.37861	8.59905	-0.241388	17.2119	-1.72778	-17.2778	196.081	13.7861	8.59905	0.150082	-241.388	0.300404
37.793	6.959	1	1	3	0	0	-1.726	0.196433	1.38038	8.60006	-0.248042	17.2129	-1.726	-17.26	196.433	13.8038	8.60006	0.150099	-248.042	0.300422
37.804	6.97	1	1	3	0	0	-1.72383	0.196992	1.38255	8.59859	-0.241692	17.2114	-1.72383	-17.2383	196.992	13.8255	8.59859	0.150074	-241.692	0.300396
37.815	6.981	1	1	3	0	0	-1.722	0.196754	1.38439	8.5995	-0.227567	17.2123	-1.722	-17.22	196.754	13.8439	8.5995	0.15009	-227.567	0.300412
37.825	6.991	1	1	3	0	0	-1.72021	0.196832	1.38617	8.59846	-0.243068	17.2113	-1.72021	-17.2021	196.832	13.8617	8.59846	0.150072	-243.068	0.300394
37.836	7.002	1	1	3	0	0	-1.71799	0.197339	1.38839	8.59659	-0.23546	17.2094	-1.71799	-17.1799	197.339	13.8839	8.59659	0.150039	-235.46	0.300361
37.846	7.012	1	1	3	0	0	-1.71639	0.197097	1.39	8.59983	-0.231054	17.2127	-1.71639	-17.1639	197.097	13.9	8.59983	0.150095	-231.054	0.300418
37.857	7.023	1	1	3	0	0	-1.71481	0.196842	1.39157	8.59908	-0.227267	17.2119	-1.71481	-17.1481	196.842	13.9157	8.59908	0.150082	-227.267	0.300405
37.868	7.034	1	1	3	0	0	-1.7128	0.197419	1.39358	8.59865	-0.233551	17.2115	-1.7128	-17.128	197.419	13.9358	8.59865	0.150075	-233.551	0.300397
37.879	7.045	1	1	3	0	0	-1.71056	0.197216	1.39582	8.6007	-0.236863	17.2135	-1.71056	-17.1056	197.216	13.9582	8.6007	0.150111	-236.863	0.300433
37.889	7.055	1	1	3	0	0	-1.7085	0.197539	1.39788	8.59734	-0.208411	17.2102	-1.7085	-17.085	197.539	13.9788	8.59734	0.150052	-208.411	0.300374
37.9	7.066	1	1	3	0	0	-1.7069	0.197648	1.39948	8.59867	-0.217454	17.2115	-1.7069	-17.069	197.648	13.9948	8.59867	0.150075	-217.454	0.300398
37.91	7.076	1	1	3	0	0	-1.70557	0.197049	1.40082	8.59661	-0.222058	17.2095	-1.70557	-17.0557	197.049	14.0082	8.59661	0.150039	-222.058	0.300362
37.921	7.087	1	1	3	0	0	-1.70346	0.197348	1.40292	8.59958	-0.228321	17.2124	-1.70346	-17.0346	197.348	14.0292	8.59958	0.150091	-228.321	0.300413
37.932	7.098	1	1	3	0	0	-1.70115	0.197825	1.40523	8.5956	-0.223833	17.2084	-1.70115	-17.0115	197.825	14.0523	8.5956	0.150022	-223.833	0.300344
37.943	7.109	1	1	3	0	0	-1.69953	0.19732	1.40685	8.59753	-0.229063	17.2104	-1.69953	-16.9953	197.32	14.0685	8.59753	0.150055	-229.063	0.300378
37.953	7.119	1	1	3	0	0	-1.69774	0.197574	1.40864	8.59682	-0.229632	17.2097	-1.69774	-16.9774	197.574	14.0864	8.59682	0.150043	-229.632	0.300365
37.964	7.13	1	1	3	0	0	-1.69536	0.197884	1.41103	8.60109	-0.235417	17.2139	-1.69536	-16.9536	197.884	14.1103	8.60109	0.150117	-235.417	0.30044
37.974	7.14	1	1	3	0	0	-1.69357	0.19752	1.41281	8.59987	-0.227788	17.2127	-1.69357	-16.9357	197.52	14.1281	8.59987	0.150096	-227.788	0.300418
37.981	7.147	1	1	3	0	0	-1.69265	0.199585	1.41373	8.59768	-0.224347	17.2105	-1.69265	-16.9265	199.585	14.1373	8.59768	0.150058	-224.347	0.30038
37.983	7.149	1	1	3	0	0	-1.6924	0.197407	1.41398	8.59774	-0.225736	17.2106	-1.6924	-16.924	197.407	14.1398	8.59774	0.150059	-225.736	0.300381
37.994	7.16	1	1	3	0	0	-1.6908	0.198477	1.41558	8.60231	-0.225714	17.2151	-1.6908	-16.908	198.477	14.1558	8.60231	0.150139	-225.714	0.300461
38.005	7.171	1	1	3	0	0	-1.68847	0.19733	1.41791	8.59969	-0.215107	17.2125	-1.68847	-16.8847	197.33	14.1791	8.59969	0.150093	-215.107	0.300415
38.016	7.182	1	1	3	0	0	-1.68629	0.197611	1.42009	8.60184	-0.214914	17.2147	-1.68629	-16.8629	197.611	14.2009	8.60184	0.15013	-214.914	0.300453
38.026	7.192	1	1	3	0	0	-1.68474	0.19751	1.42164	8.60367	-0.227273	17.2165	-1.68474	-16.8474	197.51	14.2164	8.60367	0.150162	-227.273	0.300485
38.037	7.203	1	1	3	0	0	-1.68282	0.196851	1.42357	8.59806	-0.215167	17.2109	-1.68282	-16.8282	196.851	14.2357	8.59806	0.150064	-215.167	0.300387
38.047	7.213	1	1	3	0	0	-1.68088	0.196978	1.4255	8.59396	-0.230379	17.2068	-1.68088	-16.8088	196.978	14.255	8.59396	0.149993	-230.379	0.300315
38.058	7.224	1	1	3	0	0	-1.6786	0.196964	1.42778	8.60184	-0.21965	17.2147	-1.6786	-16.786	196.964	14.2778	8.60184	0.15013	-219.65	0.300453
38.069	7.235	1	1	3	0	0	-1.67661	0.196721	1.42977	8.59563	-0.21056	17.2085	-1.67661	-16.7661	196.721	14.2977	8.59563	0.150022	-210.56	0.300344
38.08	7.246	1	1	3	0	0	-1.67455	0.197426	1.43183	8.60088	-0.215456	17.2137	-1.67455	-16.7455	197.426	14.3183	8.60088	0.150114	-215.456	0.300436
38.09	7.256	1	1	3	0	0	-1.67273	0.196353	1.43365	8.5965	-0.217253	17.2093	-1.67273	-16.7273	196.353	14.3365	8.5965	0.150037	-217.253	0.30036
38.101	7.267	1	1	3	0	0	-1.67058	0.197008	1.43581	8.59926	-0.205376	17.2121	-1.67058	-16.7058	197.008	14.3581	8.59926	0.150085	-205.376	0.300408
38.111	7.277	1	1	3	0	0	-1.66832	0.197464	1.43807	8.60014	-0.22345	17.213	-1.66832	-16.6832	197.464	14.3807	8.60014	0.150101	-223.45	0.300423
38.122	7.288	1	1	3	0	0	-1.66657	0.196169	1.43981	8.59662	-0.216326	17.2095	-1.66657	-16.6657	196.169	14.3981	8.59662	0.150039	-216.326	0.300362
38.133	7.299	1	1	3	0	0	-1.66477	0.196316	1.44161	8.59818	-0.216724	17.211	-1.66477	-16.6477	196.316	14.4161	8.59818	0.150066	-216.724	0.300389
38.144	7.31	1	1	3	0	0	-1.66285	0.196615	1.44353	8.60059	-0.210462	17.2134	-1.66285	-16.6285	196.615	14.4353	8.60059	0.150109	-210.462	0.300431
38.154	7.32	1	1	3	0	0	-1.66098	0.19602	1.44541	8.59753	-0.21222	17.2104	-1.66098	-16.6098	196.02	14.4541	8.59753	0.150055	-212.22	0.300378
38.165	7.331	1	1	3	0	0	-1.65972	0.195976	1.44666	8.59794	-0.215689	17.2108	-1.65972	-16.5972	195.976	14.4666	8.59794	0.150062	-215.689	0.300385
38.175	7.341	1	1	3	0	0	-1.65757	0.196349	1.44882	8.59974	-0.23869	17.2126	-1.65757	-16.5757	196.349	14.4882	8.59974	0.150094	-238.69	0.300416
38.186	7.352	1	1	3	0	0	-1.65505	0.196429	1.45134	8.59785	-0.215064	17.2107	-1.65505	-16.5505	196.429	14.5134	8.59785	0.150061	-215.064	0.300383
38.197	7.363	1	1	3	0	0	-1.65336	0.196231	1.45302	8.59897	-0.225229	17.2118	-1.65336	-16.5336	196.231	14.5302	8.59897	0.15008	-225.229	0.300403
38.208	7.374	1	1	3	0	0	-1.65186	0.19619	1.45452	8.59655	-0.222267	17.2094	-1.65186	-16.5186	196.19	14.5452	8.59655	0.150038	-222.267	0.300361
38.218	7.384	1	1	3	0	0	-1.65011	0.195933	1.45628	8.60061	-0.234283	17.2134	-1.65011	-16.5011	195.933	14.5628	8.60061	0.150109	-234.283	0.300431
38.229	7.395	1	1	3	0	0	-1.64783	0.196259	1.45855	8.60046	-0.231592	17.2133	-1.64783	-16.4783	196.259	14.5855	8.60046	0.150106	-231.592	0.300429
38.239	7.405	1	1	3	0	0	-1.64682	0.195927	1.45956	8.59927	-0.233664	17.2121	-1.64682	-16.4682	195.927	14.5956	8.59927	0.150086	-233.664	0.300408
38.25	7.416	1	1	3	0	0	-1.64472	0.196036	1.46166	8.6001	-0.239749	17.2129	-1.64472	-16.4472	196.036	14.6166	8.6001	0.1501	-239.749	0.300422
38.261	7.427	1	1	3	0	0	-1.6425	0.196336	1.46389	8.597	-0.231879	17.2098	-1.6425	-16.425	196.336	14.6389	8.597	0.150046	-231.879	0.300368
38.272	7.438	1	1	3	0	0	-1.64069	0.196297	1.46569	8.59888	-0.221136	17.2117	-1.64069	-16.4069	196.297	14.6569	8.59888	0.150079	-221.136	0.300401
38.282	7.448	1	1	3	0	0	-1.63956	0.195715	1.46683	8.60209	-0.233385	17.2149	-1.63956	-16.3956	195.715	14.6683	8.60209	0.150135	-233.385	0.300457
38.293	7.459	1	1	3	0	0	-1.63774	0.195855	1.46865	8.59654	-0.226486	17.2094	-1.63774	-16.3774	195.855	14.6865	8.59654	0.150038	-226.486	0.30036
38.304	7.47	1	1	3	0	0	-1.63585	0.196396	1.47053	8.59898	-0.21177	17.2118	-1.63585	-16.3585	196.396	14.7053	8.59898	0.150081	-211.77	0.300403
38.315	7.481	1	1	3	0	0	-1.63391	0.196058	1.47247	8.60146	-0.20412	17.2143	-1.63391	-16.3391	196.058	14.7247	8.60146	0.150124	-204.12	0.300446
38.325	7.491	1	1	3	0	0	-1.63272	0.195724	1.47366	8.59517	-0.22738	17.208	-1.63272	-16.3272	195.724	14.7366	8.59517	0.150014	-227.38	0.300336
38.336	7.502	1	1	3	0	0	-1.63042	0.196294	1.47596	8.60064	-0.216617	17.2135	-1.63042	-16.3042	196.294	14.7596	8.60064	0.15011	-216.617	0.300432
38.346	7.512	1	1	3	0	0	-1.62885	0.196223	1.47754	8.5989	-0.238368	17.2117	-1.62885	-16.2885	196.223	14.7754	8.5989	0.150079	-238.368	0.300402
38.357	7.523	1	1	3	0	0	-1.62752	0.196011	1.47886	8.59784	-0.22673	17.2107	-1.62752	-16.2752	196.011	14.7886	8.59784	0.150061	-226.73	0.300383
38.368	7.534	1	1	3	0	0	-1.62562	0.195884	1.48077	8.5982	-0.219177	17.211	-1.62562	-16.2562	195.884	14.8077	8.5982	0.150067	-219.177	0.300389
38.379	7.545	1	1	3	0	0	-1.62366	0.19593	1.48272	8.60101	-0.214188	17.2138	-1.62366	-16.2366	195.93	14.8272	8.60101	0.150116	-214.188	0.300438
38.389	7.555	1	1	3	0	0	-1.62157	0.196487	1.48481	8.59899	-0.210264	17.2118	-1.62157	-16.2157	196.487	14.8481	8.59899	0.150081	-210.264	0.300403
38.4	7.566	1	1	3	0	0	-1.62009	0.195911	1.4863	8.59983	-0.197475	17.2127	-1.62009	-16.2009	195.911	14.863	8.59983	0.150095	-197.475	0.300418
38.41	7.576	1	1	3	0	0	-1.6182	0.19635	1.48819	8.59662	-0.231183	17.2095	-1.6182	-16.182	196.35	14.8819	8.59662	0.150039	-231.183	0.300362
38.421	7.587	1	1	3	0	0	-1.61658	0.19607	1.4898	8.59855	-0.225067	17.2114	-1.61658	-16.1658	196.07	14.898	8.59855	0.150073	-225.067	0.300395
38.432	7.598	1	1	3	0	0	-1.61458	0.195668	1.4918	8.59755	-0.220164	17.2104	-1.61458	-16.1458	195.668	14.918	8.59755	0.150056	-220.164	0.300378
38.443	7.609	1	1	3	0	0	-1.61274	0.195659	1.49365	8.59468	-0.206625	17.2075	-1.61274	-16.1274	195.659	14.9365	8.59468	0.150006	-206.625	0.300328
38.453	7.619	1	1	3	0	0	-1.61093	0.195762	1.49545	8.59942	-0.227042	17.2123	-1.61093	-16.1093	195.762	14.9545	8.59942	0.150088	-227.042	0.300411
38.464	7.63	1	1	3	0	0	-1.60883	0.195566	1.49755	8.59727	-0.226227	17.2101	-1.60883	-16.0883	195.566	14.9755	8.59727	0.150051	-226.227	0.300373
38.474	7.64	1	1	3	0	0	-1.60696	0.195646	1.49942	8.59884	-0.219657	17.2117	-1.60696	-16.0696	195.646	14.9942	8.59884	0.150078	-219.657	0.300401
38.485	7.651	1	1	3	0	0	-1.60548	0.19559	1.5009	8.59559	-0.22594	17.2084	-1.60548	-16.0548	195.59	15.009	8.59559	0.150021	-225.94	0.300344
38.496	7.662	1	1	3	0	0	-1.60293	0.195326	1.50345	8.59901	-0.223873	17.2119	-1.60293	-16.0293	195.326	15.0345	8.59901	0.150081	-223.873	0.300404
38.507	7.673	1	1	3	0	0	-1.60119	0.195568	1.50519	8.5953	-0.225013	17.2081	-1.60119	-16.0119	195.568	15.0519	8.5953	0.150016	-225.013	0.300339
38.517	7.683	1	1	3	0	0	-1.59933	0.195766	1.50705	8.59963	-0.239293	17.2125	-1.59933	-15.9933	195.766	15.0705	8.59963	0.150092	-239.293	0.300414
38.528	7.694	1	1	3	0	0	-1.59738	0.195308	1.50901	8.59742	-0.231967	17.2103	-1.59738	-15.9738	195.308	15.0901	8.59742	0.150053	-231.967	0.300376
38.538	7.704	1	1	3	0	0	-1.59567	0.195478	1.51071	8.59907	-0.248372	17.2119	-1.59567	-15.9567	195.478	15.1071	8.59907	0.150082	-248.372	0.300404
38.549	7.715	1	1	3	0	0	-1.59401	0.195498	1.51237	8.60081	-0.247586	17.2137	-1.59401	-15.9401	195.498	15.1237	8.60081	0.150113	-247.586	0.300435
38.56	7.726	1	1	3	0	0	-1.59234	0.195188	1.51405	8.59906	-0.238266	17.2119	-1.59234	-15.9234	195.188	15.1405	8.59906	0.150082	-238.266	0.300404
38.571	7.737	1	1	3	0	0	-1.59092	0.195271	1.51546	8.59785	-0.229221	17.2107	-1.59092	-15.9092	195.271	15.1546	8.59785	0.150061	-229.221	0.300383
38.581	7.747	1	1	3	0	0	-1.58954	0.195248	1.51684	8.601	-0.23859	17.2138	-1.58954	-15.8954	195.248	15.1684	8.601	0.150116	-238.59	0.300438
38.592	7.758	1	1	3	0	0	-1.58705	0.195483	1.51933	8.59712	-0.24729	17.21	-1.58705	-15.8705	195.483	15.1933	8.59712	0.150048	-247.29	0.300371
38.602	7.768	1	1	3	0	0	-1.58583	0.195259	1.52055	8.60032	-0.222221	17.2132	-1.58583	-15.8583	195.259	15.2055	8.60032	0.150104	-222.221	0.300426
38.613	7.779	1	1	3	0	0	-1.58356	0.195687	1.52282	8.59793	-0.236679	17.2108	-1.58356	-15.8356	195.687	15.2282	8.59793	0.150062	-236.679	0.300385
38.624	7.79	1	1	3	0	0	-1.58203	0.195382	1.52435	8.59638	-0.237669	17.2092	-1.58203	-15.8203	195.382	15.2435	8.59638	0.150035	-237.669	0.300358
38.635	7.801	1	1	3	0	0	-1.58071	0.195314	1.52567	8.5997	-0.247164	17.2125	-1.58071	-15.8071	195.314	15.2567	8.5997	0.150093	-247.164	0.300415
38.645	7.811	1	1	3	0	0	-1.57906	0.195312	1.52732	8.5967	-0.232318	17.2095	-1.57906	-15.7906	195.312	15.2732	8.5967	0.150041	-232.318	0.300363
38.656	7.822	1	1	3	0	0	-1.57685	0.195404	1.52954	8.59813	-0.241388	17.211	-1.57685	-15.7685	195.404	15.2954	8.59813	0.150066	-241.388	0.300388
38.666	7.832	1	1	3	0	0	-1.57544	0.19576	1.53094	8.59719	-0.22825	17.21	-1.57544	-15.7544	195.76	15.3094	8.59719	0.150049	-228.25	0.300372
38.677	7.843	1	1	3	0	0	-1.57392	0.195187	1.53246	8.59982	-0.238737	17.2127	-1.57392	-15.7392	195.187	15.3246	8.59982	0.150095	-238.737	0.300418
38.688	7.854	1	1	3	0	0	-1.57191	0.195727	1.53448	8.59741	-0.235531	17.2102	-1.57191	-15.7191	195.727	15.3448	8.59741	0.150053	-235.531	0.300375
38.699	7.865	1	1	3	0	0	-1.57027	0.195857	1.53611	8.5983	-0.241684	17.2111	-1.57027	-15.7027	195.857	15.3611	8.5983	0.150069	-241.684	0.300391
38.709	7.875	1	1	3	0	0	-1.56889	0.195314	1.53749	8.59657	-0.233142	17.2094	-1.56889	-15.6889	195.314	15.3749	8.59657	0.150038	-233.142	0.300361
38.72	7.886	1	1	3	0	0	-1.56722	0.195685	1.53917	8.59607	-0.231356	17.2089	-1.56722	-15.6722	195.685	15.3917	8.59607	0.15003	-231.356	0.300352
38.73	7.896	1	1	3	0	0	-1.56539	0.195891	1.54099	8.59892	-0.23388	17.2118	-1.56539	-15.6539	195.891	15.4099	8.59892	0.150079	-233.88	0.300402
38.741	7.907	1	1	3	0	0	-1.56367	0.195476	1.54271	8.59808	-0.224501	17.2109	-1.56367	-15.6367	195.476	15.4271	8.59808	0.150065	-224.501	0.300387
38.752	7.918	1	1	3	0	0	-1.56213	0.195776	1.54425	8.5958	-0.227268	17.2086	-1.56213	-15.6213	195.776	15.4425	8.5958	0.150025	-227.268	0.300348
38.763	7.929	1	1	3	0	0	-1.56063	0.195913	1.54575	8.5955	-0.215546	17.2083	-1.56063	-15.6063	195.913	15.4575	8.5955	0.15002	-215.546	0.300342
38.773	7.939	1	1	3	0	0	-1.55855	0.195746	1.54783	8.59827	-0.22608	17.2111	-1.55855	-15.5855	195.746	15.4783	8.59827	0.150068	-226.08	0.300391
38.784	7.95	1	1	3	0	0	-1.55715	0.195781	1.54924	8.59708	-0.225637	17.2099	-1.55715	-15.5715	195.781	15.4924	8.59708	0.150047	-225.637	0.30037
38.794	7.96	1	1	3	0	0	-1.55581	0.195842	1.55058	8.59701	-0.22918	17.2098	-1.55581	-15.5581	195.842	15.5058	8.59701	0.150046	-229.18	0.300368
38.805	7.971	1	1	3	0	0	-1.55382	0.195867	1.55256	8.59736	-0.23056	17.2102	-1.55382	-15.5382	195.867	15.5256	8.59736	0.150052	-230.56	0.300375
38.816	7.982	1	1	3	0	0	-1.55166	0.19624	1.55472	8.59833	-0.217739	17.2112	-1.55166	-15.5166	196.24	15.5472	8.59833	0.150069	-217.739	0.300392
38.827	7.993	1	1	3	0	0	-1.54999	0.196433	1.55639	8.60125	-0.21782	17.2141	-1.54999	-15.4999	196.433	15.5639	8.60125	0.15012	-217.82	0.300442
38.837	8.003	1	1	3	0	0	-1.54876	0.195799	1.55763	8.59788	-0.232003	17.2107	-1.54876	-15.4876	195.799	15.5763	8.59788	0.150061	-232.003	0.300384
38.848	8.014	1	1	3	0	0	-1.54671	0.196131	1.55967	8.59938	-0.214524	17.2122	-1.54671	-15.4671	196.131	15.5967	8.59938	0.150088	-214.524	0.30041
38.858	8.024	1	1	3	0	0	-1.54508	0.196377	1.5613	8.59814	-0.226013	17.211	-1.54508	-15.4508	196.377	15.613	8.59814	0.150066	-226.013	0.300388
38.869	8.035	1	1	3	0	0	-1.54316	0.19623	1.56322	8.59709	-0.2217	17.2099	-1.54316	-15.4316	196.23	15.6322	8.59709	0.150048	-221.7	0.30037
38.88	8.046	1	1	3	0	0	-1.54155	0.196281	1.56484	8.59902	-0.228417	17.2119	-1.54155	-15.4155	196.281	15.6484	8.59902	0.150081	-228.417	0.300404
38.891	8.057	1	1	3	0	0	-1.54016	0.196418	1.56622	8.59594	-0.224932	17.2088	-1.54016	-15.4016	196.418	15.6622	8.59594	0.150027	-224.932	0.30035
38.901	8.067	1	1	3	0	0	-1.53777	0.196596	1.56861	8.59612	-0.233577	17.209	-1.53777	-15.3777	196.596	15.6861	8.59612	0.150031	-233.577	0.300353
38.912	8.078	1	1	3	0	0	-1.53592	0.196825	1.57046	8.59747	-0.221433	17.2103	-1.53592	-15.3592	196.825	15.7046	8.59747	0.150054	-221.433	0.300377
38.922	8.088	1	1	3	0	0	-1.53489	0.196573	1.57149	8.59818	-0.225703	17.211	-1.53489	-15.3489	196.573	15.7149	8.59818	0.150067	-225.703	0.300389
38.933	8.099	1	1	3	0	0	-1.53292	0.196437	1.57346	8.59889	-0.234719	17.2117	-1.53292	-15.3292	196.437	15.7346	8.59889	0.150079	-234.719	0.300401
38.944	8.11	1	1	3	0	0	-1.53117	0.19662	1.57521	8.60294	-0.236845	17.2158	-1.53117	-15.3117	196.62	15.7521	8.60294	0.15015	-236.845	0.300472
38.955	8.121	1	1	3	0	0	-1.52941	0.196273	1.57698	8.59502	-0.226514	17.2079	-1.52941	-15.2941	196.273	15.7698	8.59502	0.150011	-226.514	0.300334
38.965	8.131	1	1	3	0	0	-1.52821	0.196445	1.57817	8.60283	-0.247632	17.2157	-1.52821	-15.2821	196.445	15.7817	8.60283	0.150148	-247.632	0.30047
38.976	8.142	1	1	3	0	0	-1.52609	0.196895	1.5803	8.59721	-0.238904	17.2101	-1.52609	-15.2609	196.895	15.803	8.59721	0.15005	-238.904	0.300372
38.986	8.152	1	1	3	0	0	-1.52454	0.196473	1.58184	8.60254	-0.24583	17.2154	-1.52454	-15.2454	196.473	15.8184	8.60254	0.150143	-245.83	0.300465
38.997	8.163	1	1	3	0	0	-1.52254	0.1966	1.58384	8.59847	-0.242031	17.2113	-1.52254	-15.2254	196.6	15.8384	8.59847	0.150072	-242.031	0.300394
39.008	8.174	1	1	3	0	0	-1.52091	0.196757	1.58548	8.59775	-0.240479	17.2106	-1.52091	-15.2091	196.757	15.8548	8.59775	0.150059	-240.479	0.300381
39.019	8.185	1	1	3	0	0	-1.51901	0.196496	1.58737	8.60155	-0.23384	17.2144	-1.51901	-15.1901	196.496	15.8737	8.60155	0.150125	-233.84	0.300448
39.029	8.195	1	1	3	0	0	-1.51722	0.196732	1.58917	8.59903	-0.23296	17.2119	-1.51722	-15.1722	196.732	15.8917	8.59903	0.150081	-232.96	0.300404
39.04	8.206	1	1	3	0	0	-1.51608	0.196708	1.59031	8.59735	-0.213939	17.2102	-1.51608	-15.1608	196.708	15.9031	8.59735	0.150052	-213.939	0.300374
39.05	8.216	1	1	3	0	0	-1.5142	0.196379	1.59218	8.59794	-0.259306	17.2108	-1.5142	-15.142	196.379	15.9218	8.59794	0.150062	-259.306	0.300385
39.061	8.227	1	1	3	0	0	-1.51216	0.196852	1.59422	8.59491	-0.240312	17.2078	-1.51216	-15.1216	196.852	15.9422	8.59491	0.15001	-240.312	0.300332
39.072	8.238	1	1	3	0	0	-1.51048	0.19692	1.5959	8.59882	-0.219642	17.2117	-1.51048	-15.1048	196.92	15.959	8.59882	0.150078	-219.642	0.3004
39.083	8.249	1	1	3	0	0	-1.50896	0.196657	1.59742	8.60077	-0.211526	17.2136	-1.50896	-15.0896	196.657	15.9742	8.60077	0.150112	-211.526	0.300434
39.089	8.255	1	1	3	0	0	-1.50776	0.196796	1.59863	8.59709	-0.263803	17.2099	-1.50776	-15.0776	196.796	15.9863	8.59709	0.150048	-263.803	0.30037
39.099	8.265	1	1	3	0	0	-1.50578	0.197029	1.6006	8.59712	-0.239856	17.21	-1.50578	-15.0578	197.029	16.006	8.59712	0.150048	-239.856	0.30037
39.11	8.276	1	1	3	0	0	-1.50409	0.196826	1.6023	8.599	-0.263727	17.2118	-1.50409	-15.0409	196.826	16.023	8.599	0.150081	-263.727	0.300403
39.121	8.287	1	1	3	0	0	-1.50236	0.196913	1.60403	8.59621	-0.257805	17.209	-1.50236	-15.0236	196.913	16.0403	8.59621	0.150032	-257.805	0.300354
39.132	8.298	1	1	3	0	0	-1.49999	0.197478	1.60639	8.59886	-0.249963	17.2117	-1.49999	-14.9999	197.478	16.0639	8.59886	0.150078	-249.963	0.300401
39.142	8.308	1	1	3	0	0	-1.49821	0.197042	1.60817	8.60232	-0.242608	17.2152	-1.49821	-14.9821	197.042	16.0817	8.60232	0.150139	-242.608	0.300461
39.153	8.319	1	1	3	0	0	-1.49627	0.197117	1.61012	8.59831	-0.238966	17.2112	-1.49627	-14.9627	197.117	16.1012	8.59831	0.150069	-238.966	0.300391
39.163	8.329	1	1	3	0	0	-1.49494	0.197152	1.61144	8.59602	-0.237936	17.2089	-1.49494	-14.9494	197.152	16.1144	8.59602	0.150029	-237.936	0.300351
39.174	8.34	1	1	3	0	0	-1.49329	0.196518	1.61309	8.60144	-0.245577	17.2143	-1.49329	-14.9329	196.518	16.1309	8.60144	0.150123	-245.577	0.300446
39.185	8.351	1	1	3	0	0	-1.49136	0.196807	1.61502	8.5957	-0.241952	17.2085	-1.49136	-14.9136	196.807	16.1502	8.5957	0.150023	-241.952	0.300346
39.196	8.362	1	1	3	0	0	-1.48916	0.196919	1.61722	8.59996	-0.233715	17.2128	-1.48916	-14.8916	196.919	16.1722	8.59996	0.150098	-233.715	0.30042
39.206	8.372	1	1	3	0	0	-1.4869	0.196881	1.61948	8.5988	-0.243855	17.2116	-1.4869	-14.869	196.881	16.1948	8.5988	0.150077	-243.855	0.3004
39.217	8.383	1	1	3	0	0	-1.4852	0.196904	1.62118	8.59787	-0.247147	17.2107	-1.4852	-14.852	196.904	16.2118	8.59787	0.150061	-247.147	0.300383
39.227	8.393	1	1	3	0	0	-1.48398	0.196768	1.62241	8.59904	-0.240548	17.2119	-1.48398	-14.8398	196.768	16.2241	8.59904	0.150082	-240.548	0.300404
39.238	8.404	1	1	3	0	0	-1.48176	0.196635	1.62462	8.59732	-0.232454	17.2102	-1.48176	-14.8176	196.635	16.2462	8.59732	0.150052	-232.454	0.300374
39.249	8.415	1	1	3	0	0	-1.47946	0.196906	1.62693	8.59678	-0.231254	17.2096	-1.47946	-14.7946	196.906	16.2693	8.59678	0.150042	-231.254	0.300365
39.26	8.426	1	1	3	0	0	-1.47746	0.196827	1.62892	8.59742	-0.226773	17.2103	-1.47746	-14.7746	196.827	16.2892	8.59742	0.150053	-226.773	0.300376
39.27	8.436	1	1	3	0	0	-1.47605	0.196169	1.63033	8.60116	-0.242081	17.214	-1.47605	-14.7605	196.169	16.3033	8.60116	0.150119	-242.081	0.300441
39.281	8.447	1	1	3	0	0	-1.47427	0.196526	1.63211	8.59672	-0.252867	17.2096	-1.47427	-14.7427	196.526	16.3211	8.59672	0.150041	-252.867	0.300363
39.291	8.457	1	1	3	0	0	-1.47181	0.196999	1.63457	8.59731	-0.204191	17.2101	-1.47181	-14.7181	196.999	16.3457	8.59731	0.150051	-204.191	0.300374
39.302	8.468	1	1	3	0	0	-1.47005	0.196558	1.63633	8.59829	-0.220597	17.2111	-1.47005	-14.7005	196.558	16.3633	8.59829	0.150069	-220.597	0.300391
39.313	8.479	1	1	3	0	0	-1.4684	0.196549	1.63798	8.59663	-0.231618	17.2095	-1.4684	-14.684	196.549	16.3798	8.59663	0.150039	-231.618	0.300362
39.324	8.49	1	1	3	0	0	-1.46682	0.196337	1.63957	8.59574	-0.24086	17.2086	-1.46682	-14.6682	196.337	16.3957	8.59574	0.150024	-240.86	0.300346
39.334	8.5	1	1	3	0	0	-1.46497	0.195998	1.64141	8.59648	-0.219557	17.2093	-1.46497	-14.6497	195.998	16.4141	8.59648	0.150037	-219.557	0.300359
39.345	8.511	1	1	3	0	0	-1.46291	0.196473	1.64348	8.59564	-0.222683	17.2085	-1.46291	-14.6291	196.473	16.4348	8.59564	0.150022	-222.683	0.300345
39.355	8.521	1	1	3	0	0	-1.46116	0.19659	1.64522	8.59981	-0.222652	17.2126	-1.46116	-14.6116	196.59	16.4522	8.59981	0.150095	-222.652	0.300417
39.366	8.532	1	1	3	0	0	-1.45961	0.195812	1.64677	8.59665	-0.229997	17.2095	-1.45961	-14.5961	195.812	16.4677	8.59665	0.15004	-229.997	0.300362
39.377	8.543	1	1	3	0	0	-1.45735	0.196452	1.64903	8.59528	-0.240922	17.2081	-1.45735	-14.5735	196.452	16.4903	8.59528	0.150016	-240.922	0.300338
39.388	8.554	1	1	3	0	0	-1.45556	0.195831	1.65082	8.59797	-0.23461	17.2108	-1.45556	-14.5556	195.831	16.5082	8.59797	0.150063	-234.61	0.300385
39.398	8.564	1	1	3	0	0	-1.4538	0.196083	1.65258	8.59719	-0.226907	17.21	-1.4538	-14.538	196.083	16.5258	8.59719	0.150049	-226.907	0.300372
39.409	8.575	1	1	3	0	0	-1.45217	0.196081	1.65421	8.59875	-0.222704	17.2116	-1.45217	-14.5217	196.081	16.5421	8.59875	0.150077	-222.704	0.300399
39.419	8.585	1	1	3	0	0	-1.45074	0.195555	1.65564	8.59669	-0.217284	17.2095	-1.45074	-14.5074	195.555	16.5564	8.59669	0.150041	-217.284	0.300363
39.43	8.596	1	1	3	0	0	-1.44876	0.195941	1.65762	8.59719	-0.218044	17.21	-1.44876	-14.4876	195.941	16.5762	8.59719	0.150049	-218.044	0.300372
39.441	8.607	1	1	3	0	0	-1.4465	0.196291	1.65988	8.59712	-0.227561	17.21	-1.4465	-14.465	196.291	16.5988	8.59712	0.150048	-227.561	0.30037
39.452	8.618	1	1	3	0	0	-1.44458	0.19585	1.66181	8.5989	-0.236571	17.2117	-1.44458	-14.4458	195.85	16.6181	8.5989	0.150079	-236.571	0.300402
39.462	8.628	1	1	3	0	0	-1.44283	0.196022	1.66355	8.59684	-0.213963	17.2097	-1.44283	-14.4283	196.022	16.6355	8.59684	0.150043	-213.963	0.300366
39.473	8.639	1	1	3	0	0	-1.44099	0.196299	1.6654	8.59458	-0.218578	17.2074	-1.44099	-14.4099	196.299	16.654	8.59458	0.150004	-218.578	0.300326
39.483	8.649	1	1	3	0	0	-1.43943	0.195598	1.66695	8.59967	-0.223534	17.2125	-1.43943	-14.3943	195.598	16.6695	8.59967	0.150092	-223.534	0.300415
39.494	8.66	1	1	3	0	0	-1.43759	0.195845	1.66879	8.59437	-0.218469	17.2072	-1.43759	-14.3759	195.845	16.6879	8.59437	0.15	-218.469	0.300322
39.505	8.671	1	1	3	0	0	-1.43598	0.196016	1.6704	8.59725	-0.225866	17.2101	-1.43598	-14.3598	196.016	16.704	8.59725	0.15005	-225.866	0.300373
39.516	8.682	1	1	3	0	0	-1.43431	0.195718	1.67207	8.59652	-0.220579	17.2094	-1.43431	-14.3431	195.718	16.7207	8.59652	0.150038	-220.579	0.30036
39.526	8.692	1	1	3	0	0	-1.43282	0.195613	1.67357	8.59719	-0.219985	17.21	-1.43282	-14.3282	195.613	16.7357	8.59719	0.150049	-219.985	0.300372
39.537	8.703	1	1	3	0	0	-1.43068	0.19623	1.6757	8.59863	-0.218447	17.2115	-1.43068	-14.3068	196.23	16.757	8.59863	0.150074	-218.447	0.300397
39.547	8.713	1	1	3	0	0	-1.42872	0.196008	1.67767	8.59408	-0.223788	17.2069	-1.42872	-14.2872	196.008	16.7767	8.59408	0.149995	-223.788	0.300317
39.558	8.724	1	1	3	0	0	-1.42695	0.196112	1.67943	8.59618	-0.214203	17.209	-1.42695	-14.2695	196.112	16.7943	8.59618	0.150032	-214.203	0.300354
39.569	8.735	1	1	3	0	0	-1.4256	0.195831	1.68078	8.5979	-0.222331	17.2107	-1.4256	-14.256	195.831	16.8078	8.5979	0.150062	-222.331	0.300384
39.58	8.746	1	1	3	0	0	-1.42394	0.195978	1.68244	8.59659	-0.218391	17.2094	-1.42394	-14.2394	195.978	16.8244	8.59659	0.150039	-218.391	0.300361
39.59	8.756	1	1	3	0	0	-1.42227	0.19604	1.68411	8.59852	-0.210805	17.2114	-1.42227	-14.2227	196.04	16.8411	8.59852	0.150073	-210.805	0.300395
39.601	8.767	1	1	3	0	0	-1.4199	0.196723	1.68648	8.60016	-0.222982	17.213	-1.4199	-14.199	196.723	16.8648	8.60016	0.150101	-222.982	0.300424
39.611	8.777	1	1	3	0	0	-1.41825	0.196192	1.68813	8.59588	-0.203518	17.2087	-1.41825	-14.1825	196.192	16.8813	8.59588	0.150026	-203.518	0.300349
39.622	8.788	1	1	3	0	0	-1.41712	0.195946	1.68926	8.59709	-0.210083	17.2099	-1.41712	-14.1712	195.946	16.8926	8.59709	0.150048	-210.083	0.30037
39.633	8.799	1	1	3	0	0	-1.41512	0.196201	1.69126	8.59793	-0.221087	17.2108	-1.41512	-14.1512	196.201	16.9126	8.59793	0.150062	-221.087	0.300385
39.644	8.81	1	1	3	0	0	-1.4135	0.195952	1.69288	8.59543	-0.231394	17.2083	-1.4135	-14.135	195.952	16.9288	8.59543	0.150019	-231.394	0.300341
39.654	8.82	1	1	3	0	0	-1.41136	0.196347	1.69503	8.59801	-0.225787	17.2108	-1.41136	-14.1136	196.347	16.9503	8.59801	0.150064	-225.787	0.300386
39.665	8.831	1	1	3	0	0	-1.4096	0.196332	1.69679	8.60149	-0.231569	17.2143	-1.4096	-14.096	196.332	16.9679	8.60149	0.150124	-231.569	0.300447
39.675	8.841	1	1	3	0	0	-1.4082	0.196049	1.69818	8.59878	-0.211359	17.2116	-1.4082	-14.082	196.049	16.9818	8.59878	0.150077	-211.359	0.300399
39.686	8.852	1	1	3	0	0	-1.40661	0.196067	1.69977	8.59484	-0.210741	17.2077	-1.40661	-14.0661	196.067	16.9977	8.59484	0.150008	-210.741	0.300331
39.697	8.863	1	1	3	0	0	-1.40449	0.196136	1.70189	8.5969	-0.219354	17.2097	-1.40449	-14.0449	196.136	17.0189	8.5969	0.150044	-219.354	0.300367
39.708	8.874	1	1	3	0	0	-1.40241	0.196207	1.70397	8.5961	-0.236874	17.2089	-1.40241	-14.0241	196.207	17.0397	8.5961	0.15003	-236.874	0.300353
39.718	8.884	1	1	3	0	0	-1.40058	0.196577	1.7058	8.59549	-0.202576	17.2083	-1.40058	-14.0058	196.577	17.058	8.59549	0.15002	-202.576	0.300342
39.729	8.895	1	1	3	0	0	-1.3991	0.195852	1.70728	8.59632	-0.223904	17.2092	-1.3991	-13.991	195.852	17.0728	8.59632	0.150034	-223.904	0.300357
39.739	8.905	1	1	3	0	0	-1.39791	0.195944	1.70847	8.59363	-0.209499	17.2065	-1.39791	-13.9791	195.944	17.0847	8.59363	0.149987	-209.499	0.30031
39.75	8.916	1	1	3	0	0	-1.39591	0.19636	1.71048	8.59455	-0.228896	17.2074	-1.39591	-13.9591	196.36	17.1048	8.59455	0.150003	-228.896	0.300326
39.761	8.927	1	1	3	0	0	-1.39413	0.196054	1.71226	8.60078	-0.22868	17.2136	-1.39413	-13.9413	196.054	17.1226	8.60078	0.150112	-228.68	0.300434
39.772	8.938	1	1	3	0	0	-1.39183	0.196456	1.71456	8.59483	-0.23963	17.2077	-1.39183	-13.9183	196.456	17.1456	8.59483	0.150008	-239.63	0.30033
39.782	8.948	1	1	3	0	0	-1.39053	0.196521	1.71585	8.59871	-0.207818	17.2116	-1.39053	-13.9053	196.521	17.1585	8.59871	0.150076	-207.818	0.300398
39.793	8.959	1	1	3	0	0	-1.38891	0.196308	1.71747	8.59826	-0.222897	17.2111	-1.38891	-13.8891	196.308	17.1747	8.59826	0.150068	-222.897	0.30039
39.803	8.969	1	1	3	0	0	-1.38707	0.196324	1.71931	8.59506	-0.212624	17.2079	-1.38707	-13.8707	196.324	17.1931	8.59506	0.150012	-212.624	0.300335
39.814	8.98	1	1	3	0	0	-1.3852	0.196863	1.72118	8.59718	-0.221189	17.21	-1.3852	-13.852	196.863	17.2118	8.59718	0.150049	-221.189	0.300371
39.825	8.991	1	1	3	0	0	-1.38351	0.195994	1.72287	8.59556	-0.23592	17.2084	-1.38351	-13.8351	195.994	17.2287	8.59556	0.150021	-235.92	0.300343
39.836	9.002	1	1	3	0	0	-1.38139	0.196706	1.725	8.59407	-0.234755	17.2069	-1.38139	-13.8139	196.706	17.25	8.59407	0.149995	-234.755	0.300317
39.846	9.012	1	1	3	0	0	-1.37996	0.196711	1.72642	8.5981	-0.237911	17.2109	-1.37996	-13.7996	196.711	17.2642	8.5981	0.150065	-237.911	0.300388
39.857	9.023	1	1	3	0	0	-1.37857	0.196228	1.72781	8.59522	-0.250992	17.2081	-1.37857	-13.7857	196.228	17.2781	8.59522	0.150015	-250.992	0.300337
39.868	9.034	1	1	3	0	0	-1.37606	0.19633	1.73032	8.59672	-0.237985	17.2096	-1.37606	-13.7606	196.33	17.3032	8.59672	0.150041	-237.985	0.300363
39.879	9.045	1	1	3	0	0	-1.37416	0.196509	1.73223	8.59439	-0.234919	17.2072	-1.37416	-13.7416	196.509	17.3223	8.59439	0.15	-234.919	0.300323
39.889	9.055	1	1	3	0	0	-1.37231	0.196144	1.73407	8.59721	-0.232697	17.2101	-1.37231	-13.7231	196.144	17.3407	8.59721	0.15005	-232.697	0.300372
39.9	9.066	1	1	3	0	0	-1.37032	0.196304	1.73606	8.59469	-0.234739	17.2075	-1.37032	-13.7032	196.304	17.3606	8.59469	0.150006	-234.739	0.300328
39.91	9.076	1	1	3	0	0	-1.36862	0.196355	1.73777	8.59665	-0.235801	17.2095	-1.36862	-13.6862	196.355	17.3777	8.59665	0.15004	-235.801	0.300362
39.921	9.087	1	1	3	0	0	-1.36709	0.195874	1.73929	8.59718	-0.247373	17.21	-1.36709	-13.6709	195.874	17.3929	8.59718	0.150049	-247.373	0.300371
39.932	9.098	1	1	3	0	0	-1.3653	0.195726	1.74109	8.59798	-0.232737	17.2108	-1.3653	-13.653	195.726	17.4109	8.59798	0.150063	-232.737	0.300385
39.943	9.109	1	1	3	0	0	-1.36329	0.195583	1.74309	8.59833	-0.231611	17.2112	-1.36329	-13.6329	195.583	17.4309	8.59833	0.150069	-231.611	0.300392
39.953	9.119	1	1	3	0	0	-1.36122	0.195727	1.74516	8.59613	-0.235273	17.209	-1.36122	-13.6122	195.727	17.4516	8.59613	0.150031	-235.273	0.300353
39.964	9.13	1	1	3	0	0	-1.3593	0.195862	1.74708	8.59581	-0.23876	17.2086	-1.3593	-13.593	195.862	17.4708	8.59581	0.150025	-238.76	0.300348
39.974	9.14	1	1	3	0	0	-1.35724	0.195746	1.74914	8.59635	-0.233689	17.2092	-1.35724	-13.5724	195.746	17.4914	8.59635	0.150035	-233.689	0.300357
39.985	9.151	1	1	3	0	0	-1.35545	0.195613	1.75094	8.5964	-0.226915	17.2092	-1.35545	-13.5545	195.613	17.5094	8.5964	0.150035	-226.915	0.300358
39.996	9.162	1	1	3	0	0	-1.35318	0.195697	1.7532	8.59748	-0.227834	17.2103	-1.35318	-13.5318	195.697	17.532	8.59748	0.150054	-227.834	0.300377
40.007	9.173	1	1	3	0	0	-1.35123	0.194954	1.75515	8.59526	-0.211456	17.2081	-1.35123	-13.5123	194.954	17.5515	8.59526	0.150016	-211.456	0.300338
40.017	9.183	1	1	3	0	0	-1.34952	0.194979	1.75687	8.59702	-0.228428	17.2099	-1.34952	-13.4952	194.979	17.5687	8.59702	0.150046	-228.428	0.300369
40.028	9.194	1	1	3	0	0	-1.34766	0.195243	1.75873	8.59715	-0.234705	17.21	-1.34766	-13.4766	195.243	17.5873	8.59715	0.150049	-234.705	0.300371
40.038	9.204	1	1	3	0	0	-1.34586	0.194668	1.76052	8.59602	-0.230161	17.2089	-1.34586	-13.4586	194.668	17.6052	8.59602	0.150029	-230.161	0.300351
40.049	9.215	1	1	3	0	0	-1.34341	0.194621	1.76297	8.59868	-0.238835	17.2115	-1.34341	-13.4341	194.621	17.6297	8.59868	0.150075	-238.835	0.300398
40.06	9.226	1	1	3	0	0	-1.34147	0.193929	1.76491	8.59447	-0.229428	17.2073	-1.34147	-13.4147	193.929	17.6491	8.59447	0.150002	-229.428	0.300324
40.071	9.237	1	1	3	0	0	-1.33906	0.193645	1.76733	8.59553	-0.231168	17.2084	-1.33906	-13.3906	193.645	17.6733	8.59553	0.15002	-231.168	0.300343
40.081	9.247	1	1	3	0	0	-1.33725	0.192964	1.76913	8.59546	-0.225256	17.2083	-1.33725	-13.3725	192.964	17.6913	8.59546	0.150019	-225.256	0.300341
40.092	9.258	1	1	3	0	0	-1.33444	0.193372	1.77195	8.59812	-0.23278	17.211	-1.33444	-13.3444	193.372	17.7195	8.59812	0.150065	-232.78	0.300388
40.102	9.268	1	1	3	0	0	-1.33261	0.192569	1.77377	8.59775	-0.236899	17.2106	-1.33261	-13.3261	192.569	17.7377	8.59775	0.150059	-236.899	0.300381
40.113	9.279	1	1	3	0	0	-1.33052	0.192526	1.77586	8.59738	-0.237905	17.2102	-1.33052	-13.3052	192.526	17.7586	8.59738	0.150053	-237.905	0.300375
40.124	9.29	1	1	3	0	0	-1.3286	0.192255	1.77779	8.59758	-0.232374	17.2104	-1.3286	-13.286	192.255	17.7779	8.59758	0.150056	-232.374	0.300379
40.135	9.301	1	1	3	0	0	-1.3263	0.191692	1.78008	8.59672	-0.226253	17.2096	-1.3263	-13.263	191.692	17.8008	8.59672	0.150041	-226.253	0.300363
40.145	9.311	1	1	3	0	0	-1.324	0.191607	1.78238	8.59813	-0.249317	17.211	-1.324	-13.24	191.607	17.8238	8.59813	0.150066	-249.317	0.300388
40.156	9.322	1	1	3	0	0	-1.32179	0.191643	1.78459	8.59631	-0.245527	17.2091	-1.32179	-13.2179	191.643	17.8459	8.59631	0.150034	-245.527	0.300356
40.166	9.332	1	1	3	0	0	-1.32003	0.1908	1.78635	8.59829	-0.237297	17.2111	-1.32003	-13.2003	190.8	17.8635	8.59829	0.150069	-237.297	0.300391
40.177	9.343	1	1	3	0	0	-1.31817	0.190483	1.78822	8.59846	-0.237553	17.2113	-1.31817	-13.1817	190.483	17.8822	8.59846	0.150071	-237.553	0.300394
40.188	9.354	1	1	3	0	0	-1.31545	0.190611	1.79093	8.59613	-0.236502	17.209	-1.31545	-13.1545	190.611	17.9093	8.59613	0.150031	-236.502	0.300353
40.199	9.365	1	1	3	0	0	-1.31332	0.190038	1.79306	8.59727	-0.231663	17.2101	-1.31332	-13.1332	190.038	17.9306	8.59727	0.150051	-231.663	0.300373
40.209	9.375	1	1	3	0	0	-1.31169	0.189819	1.7947	8.59627	-0.242717	17.2091	-1.31169	-13.1169	189.819	17.947	8.59627	0.150033	-242.717	0.300356
40.22	9.386	1	1	3	0	0	-1.30963	0.189715	1.79675	8.59615	-0.242194	17.209	-1.30963	-13.0963	189.715	17.9675	8.59615	0.150031	-242.194	0.300354
40.23	9.396	1	1	3	0	0	-1.30777	0.188801	1.79861	8.59923	-0.236016	17.2121	-1.30777	-13.0777	188.801	17.9861	8.59923	0.150085	-236.016	0.300407
40.241	9.407	1	1	3	0	0	-1.30577	0.188675	1.80061	8.59604	-0.237522	17.2089	-1.30577	-13.0577	188.675	18.0061	8.59604	0.150029	-237.522	0.300352
40.252	9.418	1	1	3	0	0	-1.30396	0.188088	1.80242	8.5952	-0.225994	17.208	-1.30396	-13.0396	188.088	18.0242	8.5952	0.150015	-225.994	0.300337
40.263	9.429	1	1	3	0	0	-1.30153	0.187696	1.80485	8.59504	-0.230158	17.2079	-1.30153	-13.0153	187.696	18.0485	8.59504	0.150012	-230.158	0.300334
40.273	9.439	1	1	3	0	0	-1.29987	0.187126	1.80652	8.59682	-0.224222	17.2097	-1.29987	-12.9987	187.126	18.0652	8.59682	0.150043	-224.222	0.300365
40.284	9.45	1	1	3	0	0	-1.29766	0.186456	1.80872	8.59553	-0.234288	17.2084	-1.29766	-12.9766	186.456	18.0872	8.59553	0.15002	-234.288	0.300343
40.294	9.46	1	1	3	0	0	-1.29564	0.186067	1.81074	8.59476	-0.225906	17.2076	-1.29564	-12.9564	186.067	18.1074	8.59476	0.150007	-225.906	0.300329
40.305	9.471	1	1	3	0	0	-1.29382	0.185723	1.81256	8.59718	-0.233662	17.21	-1.29382	-12.9382	185.723	18.1256	8.59718	0.150049	-233.662	0.300371
40.316	9.482	1	1	3	0	0	-1.29173	0.185008	1.81466	8.5988	-0.229873	17.2116	-1.29173	-12.9173	185.008	18.1466	8.5988	0.150077	-229.873	0.3004
40.327	9.493	1	1	3	0	0	-1.28946	0.184935	1.81692	8.59522	-0.225303	17.2081	-1.28946	-12.8946	184.935	18.1692	8.59522	0.150015	-225.303	0.300337
40.337	9.503	1	1	3	0	0	-1.28741	0.184558	1.81897	8.59587	-0.228785	17.2087	-1.28741	-12.8741	184.558	18.1897	8.59587	0.150026	-228.785	0.300349
40.348	9.514	1	1	3	0	0	-1.286	0.183585	1.82038	8.59716	-0.233458	17.21	-1.286	-12.86	183.585	18.2038	8.59716	0.150049	-233.458	0.300371
40.358	9.524	1	1	3	0	0	-1.28402	0.18356	1.82236	8.59478	-0.226688	17.2076	-1.28402	-12.8402	183.56	18.2236	8.59478	0.150007	-226.688	0.30033
40.369	9.535	1	1	3	0	0	-1.28162	0.182865	1.82476	8.59661	-0.228188	17.2095	-1.28162	-12.8162	182.865	18.2476	8.59661	0.150039	-228.188	0.300362
40.38	9.546	1	1	3	0	0	-1.27982	0.182106	1.82656	8.59751	-0.235334	17.2104	-1.27982	-12.7982	182.106	18.2656	8.59751	0.150055	-235.334	0.300377
40.391	9.557	1	1	3	0	0	-1.27787	0.181815	1.82851	8.59573	-0.226423	17.2086	-1.27787	-12.7787	181.815	18.2851	8.59573	0.150024	-226.423	0.300346
40.401	9.567	1	1	3	0	0	-1.27638	0.18148	1.83	8.59983	-0.240271	17.2127	-1.27638	-12.7638	181.48	18.3	8.59983	0.150095	-240.271	0.300418
40.412	9.578	1	1	3	0	0	-1.27415	0.18135	1.83223	8.59537	-0.235483	17.2082	-1.27415	-12.7415	181.35	18.3223	8.59537	0.150018	-235.483	0.30034
40.422	9.588	1	1	3	0	0	-1.27278	0.181194	1.83361	8.59453	-0.241083	17.2074	-1.27278	-12.7278	181.194	18.3361	8.59453	0.150003	-241.083	0.300325
40.433	9.599	1	1	3	0	0	-1.27149	0.180675	1.83489	8.59517	-0.237534	17.208	-1.27149	-12.7149	180.675	18.3489	8.59517	0.150014	-237.534	0.300336
40.444	9.61	1	1	3	0	0	-1.26965	0.180302	1.83673	8.5963	-0.244849	17.2091	-1.26965	-12.6965	180.302	18.3673	8.5963	0.150034	-244.849	0.300356
40.455	9.621	1	1	3	0	0	-1.26781	0.180193	1.83857	8.59532	-0.218168	17.2082	-1.26781	-12.6781	180.193	18.3857	8.59532	0.150017	-218.168	0.300339
40.465	9.631	1	1	3	0	0	-1.26669	0.180173	1.83969	8.59456	-0.251731	17.2074	-1.26669	-12.6669	180.173	18.3969	8.59456	0.150003	-251.731	0.300326
40.476	9.642	1	1	3	0	0	-1.26481	0.179389	1.84157	8.59643	-0.232762	17.2093	-1.26481	-12.6481	179.389	18.4157	8.59643	0.150036	-232.762	0.300358
40.486	9.652	1	1	3	0	0	-1.26332	0.179344	1.84307	8.59515	-0.232844	17.208	-1.26332	-12.6332	179.344	18.4307	8.59515	0.150014	-232.844	0.300336
40.497	9.663	1	1	3	0	0	-1.26153	0.179367	1.84485	8.59502	-0.222922	17.2079	-1.26153	-12.6153	179.367	18.4485	8.59502	0.150011	-222.922	0.300334
40.508	9.674	1	1	3	0	0	-1.25975	0.179108	1.84663	8.59464	-0.217947	17.2075	-1.25975	-12.5975	179.108	18.4663	8.59464	0.150005	-217.947	0.300327
40.519	9.685	1	1	3	0	0	-1.2584	0.178898	1.84798	8.59475	-0.206712	17.2076	-1.2584	-12.584	178.898	18.4798	8.59475	0.150007	-206.712	0.300329
40.529	9.695	1	1	3	0	0	-1.25687	0.179027	1.84951	8.5958	-0.245027	17.2086	-1.25687	-12.5687	179.027	18.4951	8.5958	0.150025	-245.027	0.300348
40.54	9.706	1	1	3	0	0	-1.25535	0.178452	1.85103	8.59625	-0.224373	17.2091	-1.25535	-12.5535	178.452	18.5103	8.59625	0.150033	-224.373	0.300355
40.55	9.716	1	1	3	0	0	-1.25425	0.178307	1.85213	8.59566	-0.245623	17.2085	-1.25425	-12.5425	178.307	18.5213	8.59566	0.150023	-245.623	0.300345
40.561	9.727	1	1	3	0	0	-1.25284	0.178277	1.85354	8.59623	-0.23648	17.2091	-1.25284	-12.5284	178.277	18.5354	8.59623	0.150033	-236.48	0.300355
40.572	9.738	1	1	3	0	0	-1.25132	0.177803	1.85506	8.59497	-0.224214	17.2078	-1.25132	-12.5132	177.803	18.5506	8.59497	0.15001	-224.214	0.300333
40.583	9.749	1	1	3	0	0	-1.24971	0.178192	1.85667	8.5975	-0.213529	17.2103	-1.24971	-12.4971	178.192	18.5667	8.5975	0.150055	-213.529	0.300377
40.593	9.759	1	1	3	0	0	-1.24808	0.178006	1.8583	8.59584	-0.233505	17.2087	-1.24808	-12.4808	178.006	18.583	8.59584	0.150026	-233.505	0.300348
40.604	9.77	1	1	3	0	0	-1.2466	0.177752	1.85979	8.59591	-0.219431	17.2088	-1.2466	-12.466	177.752	18.5979	8.59591	0.150027	-219.431	0.300349
40.614	9.78	1	1	3	0	0	-1.24513	0.17801	1.86125	8.59621	-0.247633	17.209	-1.24513	-12.4513	178.01	18.6125	8.59621	0.150032	-247.633	0.300354
40.625	9.791	1	1	3	0	0	-1.24327	0.177876	1.86311	8.59634	-0.229573	17.2092	-1.24327	-12.4327	177.876	18.6311	8.59634	0.150034	-229.573	0.300357
40.636	9.802	1	1	3	0	0	-1.24181	0.177888	1.86458	8.59539	-0.220973	17.2082	-1.24181	-12.4181	177.888	18.6458	8.59539	0.150018	-220.973	0.30034
40.647	9.813	1	1	3	0	0	-1.24061	0.177878	1.86577	8.59484	-0.198487	17.2077	-1.24061	-12.4061	177.878	18.6577	8.59484	0.150008	-198.487	0.300331
40.657	9.823	1	1	3	0	0	-1.23904	0.177533	1.86734	8.5955	-0.225156	17.2083	-1.23904	-12.3904	177.533	18.6734	8.5955	0.15002	-225.156	0.300342
40.668	9.834	1	1	3	0	0	-1.23733	0.177747	1.86906	8.59426	-0.213351	17.2071	-1.23733	-12.3733	177.747	18.6906	8.59426	0.149998	-213.351	0.300321
40.678	9.844	1	1	3	0	0	-1.23632	0.177794	1.87007	8.5949	-0.230775	17.2077	-1.23632	-12.3632	177.794	18.7007	8.5949	0.150009	-230.775	0.300332
40.689	9.855	1	1	3	0	0	-1.235	0.17735	1.87138	8.59421	-0.215529	17.207	-1.235	-12.35	177.35	18.7138	8.59421	0.149997	-215.529	0.30032
40.7	9.866	1	1	3	0	0	-1.23323	0.177742	1.87316	8.5963	-0.208713	17.2091	-1.23323	-12.3323	177.742	18.7316	8.5963	0.150034	-208.713	0.300356
40.711	9.877	1	1	3	0	0	-1.23177	0.177998	1.87461	8.5967	-0.203941	17.2095	-1.23177	-12.3177	177.998	18.7461	8.5967	0.150041	-203.941	0.300363
40.721	9.887	1	1	3	0	0	-1.23071	0.177621	1.87567	8.59437	-0.202585	17.2072	-1.23071	-12.3071	177.621	18.7567	8.59437	0.15	-202.585	0.300322
40.732	9.898	1	1	3	0	0	-1.22907	0.177913	1.87731	8.59864	-0.194006	17.2115	-1.22907	-12.2907	177.913	18.7731	8.59864	0.150075	-194.006	0.300397
40.743	9.909	1	1	3	0	0	-1.22724	0.178355	1.87914	8.59466	-0.197397	17.2075	-1.22724	-12.2724	178.355	18.7914	8.59466	0.150005	-197.397	0.300327
40.754	9.92	1	1	3	0	0	-1.22535	0.17787	1.88103	8.59467	-0.218115	17.2075	-1.22535	-12.2535	177.87	18.8103	8.59467	0.150005	-218.115	0.300328
40.764	9.93	1	1	3	0	0	-1.22394	0.178055	1.88245	8.59448	-0.192686	17.2073	-1.22394	-12.2394	178.055	18.8245	8.59448	0.150002	-192.686	0.300324
40.775	9.941	1	1	3	0	0	-1.22249	0.178214	1.88389	8.59522	-0.210319	17.2081	-1.22249	-12.2249	178.214	18.8389	8.59522	0.150015	-210.319	0.300337
40.785	9.951	1	1	3	0	0	-1.22081	0.178191	1.88558	8.59772	-0.203198	17.2106	-1.22081	-12.2081	178.191	18.8558	8.59772	0.150059	-203.198	0.300381
40.796	9.962	1	1	3	0	0	-1.21895	0.178532	1.88743	8.59408	-0.202761	17.2069	-1.21895	-12.1895	178.532	18.8743	8.59408	0.149995	-202.761	0.300317
40.807	9.973	1	1	3	0	0	-1.2172	0.178726	1.88918	8.59659	-0.216908	17.2094	-1.2172	-12.172	178.726	18.8918	8.59659	0.150039	-216.908	0.300361
40.818	9.984	1	1	3	0	0	-1.21541	0.17834	1.89097	8.59612	-0.228321	17.209	-1.21541	-12.1541	178.34	18.9097	8.59612	0.150031	-228.321	0.300353
40.828	9.994	1	1	3	0	0	-1.21396	0.178425	1.89242	8.59745	-0.214234	17.2103	-1.21396	-12.1396	178.425	18.9242	8.59745	0.150054	-214.234	0.300376
40.839	10.005	1	1	3	0	0	-1.21285	0.178403	1.89353	8.59479	-0.220229	17.2076	-1.21285	-12.1285	178.403	18.9353	8.59479	0.150007	-220.229	0.30033
40.849	10.015	1	1	3	0	0	-1.21103	0.178315	1.89536	8.59438	-0.220682	17.2072	-1.21103	-12.1103	178.315	18.9536	8.59438	0.15	-220.682	0.300323
40.86	10.026	1	1	3	0	0	-1.20912	0.178584	1.89726	8.59472	-0.23408	17.2076	-1.20912	-12.0912	178.584	18.9726	8.59472	0.150006	-234.08	0.300329
40.871	10.037	1	1	3	0	0	-1.20722	0.178704	1.89917	8.59433	-0.236041	17.2072	-1.20722	-12.0722	178.704	18.9917	8.59433	0.149999	-236.041	0.300322
40.882	10.048	1	1	3	0	0	-1.2055	0.178669	1.90088	8.5947	-0.230422	17.2075	-1.2055	-12.055	178.669	19.0088	8.5947	0.150006	-230.422	0.300328
40.892	10.058	1	1	3	0	0	-1.20373	0.178759	1.90265	8.59591	-0.225276	17.2088	-1.20373	-12.0373	178.759	19.0265	8.59591	0.150027	-225.276	0.300349
40.903	10.069	1	1	3	0	0	-1.20256	0.178262	1.90382	8.59704	-0.22492	17.2099	-1.20256	-12.0256	178.262	19.0382	8.59704	0.150047	-224.92	0.300369
40.913	10.079	1	1	3	0	0	-1.20054	0.178454	1.90585	8.59647	-0.223605	17.2093	-1.20054	-12.0054	178.454	19.0585	8.59647	0.150037	-223.605	0.300359
40.924	10.09	1	1	3	0	0	-1.19852	0.178838	1.90787	8.59617	-0.223511	17.209	-1.19852	-11.9852	178.838	19.0787	8.59617	0.150031	-223.511	0.300354
40.935	10.101	1	1	3	0	0	-1.19681	0.178656	1.90957	8.59524	-0.225779	17.2081	-1.19681	-11.9681	178.656	19.0957	8.59524	0.150015	-225.779	0.300338
40.946	10.112	1	1	3	0	0	-1.19491	0.178829	1.91147	8.59702	-0.228838	17.2099	-1.19491	-11.9491	178.829	19.1147	8.59702	0.150046	-228.838	0.300369
40.956	10.122	1	1	3	0	0	-1.19313	0.179053	1.91326	8.5946	-0.221198	17.2074	-1.19313	-11.9313	179.053	19.1326	8.5946	0.150004	-221.198	0.300326
40.967	10.133	1	1	3	0	0	-1.19149	0.178376	1.9149	8.59578	-0.225111	17.2086	-1.19149	-11.9149	178.376	19.149	8.59578	0.150025	-225.111	0.300347
40.977	10.143	1	1	3	0	0	-1.18955	0.17876	1.91683	8.59634	-0.21445	17.2092	-1.18955	-11.8955	178.76	19.1683	8.59634	0.150034	-214.45	0.300357
40.988	10.154	1	1	3	0	0	-1.18727	0.179062	1.91912	8.59422	-0.214233	17.2071	-1.18727	-11.8727	179.062	19.1912	8.59422	0.149997	-214.233	0.30032
40.999	10.165	1	1	3	0	0	-1.18559	0.178638	1.9208	8.59404	-0.216592	17.2069	-1.18559	-11.8559	178.638	19.208	8.59404	0.149994	-216.592	0.300317
41.01	10.176	1	1	3	0	0	-1.18324	0.178902	1.92315	8.59615	-0.225251	17.209	-1.18324	-11.8324	178.902	19.2315	8.59615	0.150031	-225.251	0.300354
41.02	10.186	1	1	3	0	0	-1.18196	0.178725	1.92442	8.59514	-0.215331	17.208	-1.18196	-11.8196	178.725	19.2442	8.59514	0.150014	-215.331	0.300336
41.031	10.197	1	1	3	0	0	-1.18009	0.178586	1.92629	8.59679	-0.223832	17.2096	-1.18009	-11.8009	178.586	19.2629	8.59679	0.150042	-223.832	0.300365
41.041	10.207	1	1	3	0	0	-1.17791	0.178723	1.92847	8.59425	-0.21478	17.2071	-1.17791	-11.7791	178.723	19.2847	8.59425	0.149998	-214.78	0.30032
41.052	10.218	1	1	3	0	0	-1.17578	0.179113	1.93061	8.59524	-0.224698	17.2081	-1.17578	-11.7578	179.113	19.3061	8.59524	0.150015	-224.698	0.300338
41.063	10.229	1	1	3	0	0	-1.17464	0.177632	1.93174	8.59448	-0.223575	17.2073	-1.17464	-11.7464	177.632	19.3174	8.59448	0.150002	-223.575	0.300324
41.074	10.24	1	1	3	0	0	-1.17223	0.177748	1.93415	8.59825	-0.228643	17.2111	-1.17223	-11.7223	177.748	19.3415	8.59825	0.150068	-228.643	0.30039
41.084	10.25	1	1	3	0	0	-1.17014	0.178011	1.93625	8.59644	-0.226497	17.2093	-1.17014	-11.7014	178.011	19.3625	8.59644	0.150036	-226.497	0.300359
41.095	10.261	1	1	3	0	0	-1.16819	0.177415	1.93819	8.5964	-0.228259	17.2092	-1.16819	-11.6819	177.415	19.3819	8.5964	0.150036	-228.259	0.300358
41.105	10.271	1	1	3	0	0	-1.16639	0.176928	1.93999	8.59462	-0.222608	17.2075	-1.16639	-11.6639	176.928	19.3999	8.59462	0.150004	-222.608	0.300327
41.116	10.282	1	1	3	0	0	-1.16348	0.176728	1.9429	8.59489	-0.228988	17.2077	-1.16348	-11.6348	176.728	19.429	8.59489	0.150009	-228.988	0.300331
41.127	10.293	1	1	3	0	0	-1.1612	0.176151	1.94519	8.59676	-0.224339	17.2096	-1.1612	-11.612	176.151	19.4519	8.59676	0.150042	-224.339	0.300364
41.138	10.304	1	1	3	0	0	-1.15825	0.17587	1.94814	8.59652	-0.227505	17.2094	-1.15825	-11.5825	175.87	19.4814	8.59652	0.150038	-227.505	0.30036
41.148	10.314	1	1	3	0	0	-1.15625	0.175368	1.95013	8.59631	-0.214945	17.2091	-1.15625	-11.5625	175.368	19.5013	8.59631	0.150034	-214.945	0.300356
41.159	10.325	1	1	3	0	0	-1.15368	0.174464	1.9527	8.59432	-0.210935	17.2072	-1.15368	-11.5368	174.464	19.527	8.59432	0.149999	-210.935	0.300321
41.169	10.335	1	1	3	0	0	-1.15123	0.174447	1.95515	8.59649	-0.228219	17.2093	-1.15123	-11.5123	174.447	19.5515	8.59649	0.150037	-228.219	0.300359
41.18	10.346	1	1	3	0	0	-1.14901	0.173581	1.95738	8.59757	-0.228325	17.2104	-1.14901	-11.4901	173.581	19.5738	8.59757	0.150056	-228.325	0.300378
41.191	10.357	1	1	3	0	0	-1.14666	0.173044	1.95973	8.59741	-0.216858	17.2102	-1.14666	-11.4666	173.044	19.5973	8.59741	0.150053	-216.858	0.300375
41.202	10.368	1	1	3	0	0	-1.14433	0.172347	1.96205	8.59468	-0.205239	17.2075	-1.14433	-11.4433	172.347	19.6205	8.59468	0.150006	-205.239	0.300328
41.212	10.378	1	1	3	0	0	-1.14145	0.171585	1.96493	8.59528	-0.219285	17.2081	-1.14145	-11.4145	171.585	19.6493	8.59528	0.150016	-219.285	0.300338
41.223	10.389	1	1	3	0	0	-1.13931	0.171111	1.96707	8.59779	-0.217404	17.2106	-1.13931	-11.3931	171.111	19.6707	8.59779	0.15006	-217.404	0.300382
41.233	10.399	1	1	3	0	0	-1.137	0.170704	1.96938	8.59418	-0.222999	17.207	-1.137	-11.37	170.704	19.6938	8.59418	0.149997	-222.999	0.300319
41.244	10.41	1	1	3	0	0	-1.13534	0.169219	1.97104	8.59608	-0.216412	17.2089	-1.13534	-11.3534	169.219	19.7104	8.59608	0.15003	-216.412	0.300352
41.255	10.421	1	1	3	0	0	-1.1326	0.169144	1.97378	8.59419	-0.21406	17.207	-1.1326	-11.326	169.144	19.7378	8.59419	0.149997	-214.06	0.300319
41.266	10.432	1	1	3	0	0	-1.1299	0.168598	1.97649	8.59424	-0.209056	17.2071	-1.1299	-11.299	168.598	19.7649	8.59424	0.149998	-209.056	0.30032
41.276	10.442	1	1	3	0	0	-1.12809	0.167561	1.97829	8.59438	-0.218756	17.2072	-1.12809	-11.2809	167.561	19.7829	8.59438	0.15	-218.756	0.300323
41.287	10.453	1	1	3	0	0	-1.12617	0.166996	1.98021	8.59788	-0.214429	17.2107	-1.12617	-11.2617	166.996	19.8021	8.59788	0.150061	-214.429	0.300384
41.297	10.463	1	1	3	0	0	-1.12371	0.166549	1.98267	8.59631	-0.221561	17.2091	-1.12371	-11.2371	166.549	19.8267	8.59631	0.150034	-221.561	0.300356
41.308	10.474	1	1	3	0	0	-1.12158	0.165419	1.9848	8.59468	-0.218547	17.2075	-1.12158	-11.2158	165.419	19.848	8.59468	0.150006	-218.547	0.300328
41.319	10.485	1	1	3	0	0	-1.11949	0.164614	1.9869	8.59444	-0.232849	17.2073	-1.11949	-11.1949	164.614	19.869	8.59444	0.150001	-232.849	0.300324
41.33	10.496	1	1	3	0	0	-1.11771	0.163682	1.98868	8.59565	-0.218804	17.2085	-1.11771	-11.1771	163.682	19.8868	8.59565	0.150022	-218.804	0.300345
41.34	10.506	1	1	3	0	0	-1.1156	0.162662	1.99078	8.59558	-0.225342	17.2084	-1.1156	-11.156	162.662	19.9078	8.59558	0.150021	-225.342	0.300344
41.351	10.517	1	1	3	0	0	-1.11151	0.16293	1.99487	8.59691	-0.229695	17.2098	-1.11151	-11.1151	162.93	19.9487	8.59691	0.150044	-229.695	0.300367
41.361	10.527	1	1	3	0	0	-1.10968	0.162214	1.9967	8.59521	-0.224989	17.2081	-1.10968	-11.0968	162.214	19.967	8.59521	0.150015	-224.989	0.300337
41.372	10.538	1	1	3	0	0	-1.10768	0.161083	1.9987	8.59537	-0.221043	17.2082	-1.10768	-11.0768	161.083	19.987	8.59537	0.150017	-221.043	0.30034
41.383	10.549	1	1	3	0	0	-1.10553	0.160399	2.00085	8.59632	-0.215937	17.2092	-1.10553	-11.0553	160.399	20.0085	8.59632	0.150034	-215.937	0.300357
41.394	10.56	1	1	3	0	0	-1.10331	0.159989	2.00307	8.59423	-0.206102	17.2071	-1.10331	-11.0331	159.989	20.0307	8.59423	0.149998	-206.102	0.30032
41.404	10.57	1	1	3	0	0	-1.1015	0.158768	2.00489	8.59571	-0.222129	17.2086	-1.1015	-11.015	158.768	20.0489	8.59571	0.150023	-222.129	0.300346
41.415	10.581	1	1	3	0	0	-1.10005	0.158038	2.00633	8.59575	-0.219115	17.2086	-1.10005	-11.0005	158.038	20.0633	8.59575	0.150024	-219.115	0.300347
41.425	10.591	1	1	3	0	0	-1.09806	0.157846	2.00833	8.59513	-0.212944	17.208	-1.09806	-10.9806	157.846	20.0833	8.59513	0.150013	-212.944	0.300336
41.436	10.602	1	1	3	0	0	-1.0958	0.156666	2.01058	8.59417	-0.210614	17.207	-1.0958	-10.958	156.666	20.1058	8.59417	0.149997	-210.614	0.300319
41.447	10.613	1	1	3	0	0	-1.09437	0.156157	2.01202	8.59484	-0.215843	17.2077	-1.09437	-10.9437	156.157	20.1202	8.59484	0.150008	-215.843	0.300331
41.458	10.624	1	1	3	0	0	-1.0924	0.155129	2.01399	8.59541	-0.213379	17.2082	-1.0924	-10.924	155.129	20.1399	8.59541	0.150018	-213.379	0.300341
41.468	10.634	1	1	3	0	0	-1.09068	0.154419	2.01571	8.59434	-0.213672	17.2072	-1.09068	-10.9068	154.419	20.1571	8.59434	0.15	-213.672	0.300322
41.479	10.645	1	1	3	0	0	-1.08869	0.154017	2.01769	8.59544	-0.210327	17.2083	-1.08869	-10.8869	154.017	20.1769	8.59544	0.150019	-210.327	0.300341
41.489	10.655	1	1	3	0	0	-1.08711	0.153168	2.01927	8.59403	-0.210223	17.2069	-1.08711	-10.8711	153.168	20.1927	8.59403	0.149994	-210.223	0.300317
41.5	10.666	1	1	3	0	0	-1.08546	0.152599	2.02093	8.59593	-0.217525	17.2088	-1.08546	-10.8546	152.599	20.2093	8.59593	0.150027	-217.525	0.30035
41.511	10.677	1	1	3	0	0	-1.08359	0.152257	2.0228	8.59435	-0.215691	17.2072	-1.08359	-10.8359	152.257	20.228	8.59435	0.15	-215.691	0.300322
41.522	10.688	1	1	3	0	0	-1.08205	0.151068	2.02433	8.59416	-0.210435	17.207	-1.08205	-10.8205	151.068	20.2433	8.59416	0.149996	-210.435	0.300319
41.532	10.698	1	1	3	0	0	-1.08046	0.150726	2.02593	8.59806	-0.206511	17.2109	-1.08046	-10.8046	150.726	20.2593	8.59806	0.150064	-206.511	0.300387
41.543	10.709	1	1	3	0	0	-1.07912	0.150198	2.02727	8.59558	-0.202499	17.2084	-1.07912	-10.7912	150.198	20.2727	8.59558	0.150021	-202.499	0.300344
41.553	10.719	1	1	3	0	0	-1.07691	0.149449	2.02947	8.5943	-0.212453	17.2071	-1.07691	-10.7691	149.449	20.2947	8.5943	0.149999	-212.453	0.300321
41.564	10.73	1	1	3	0	0	-1.07529	0.148984	2.03109	8.59697	-0.214797	17.2098	-1.07529	-10.7529	148.984	20.3109	8.59697	0.150045	-214.797	0.300368
41.575	10.741	1	1	3	0	0	-1.07319	0.148262	2.03319	8.59544	-0.209174	17.2083	-1.07319	-10.7319	148.262	20.3319	8.59544	0.150019	-209.174	0.300341
41.586	10.752	1	1	3	0	0	-1.0713	0.147154	2.03508	8.59581	-0.201636	17.2086	-1.0713	-10.713	147.154	20.3508	8.59581	0.150025	-201.636	0.300348
41.596	10.762	1	1	3	0	0	-1.06968	0.146693	2.0367	8.59434	-0.214912	17.2072	-1.06968	-10.6968	146.693	20.367	8.59434	0.15	-214.912	0.300322
41.607	10.773	1	1	3	0	0	-1.06746	0.146517	2.03892	8.59443	-0.213208	17.2073	-1.06746	-10.6746	146.517	20.3892	8.59443	0.150001	-213.208	0.300324
41.618	10.784	1	1	3	0	0	-1.06603	0.145201	2.04035	8.59616	-0.208595	17.209	-1.06603	-10.6603	145.201	20.4035	8.59616	0.150031	-208.595	0.300354
41.629	10.795	1	1	3	0	0	-1.06426	0.144741	2.04213	8.59434	-0.20111	17.2072	-1.06426	-10.6426	144.741	20.4213	8.59434	0.15	-201.11	0.300322
41.639	10.805	1	1	3	0	0	-1.06196	0.144609	2.04442	8.59628	-0.203053	17.2091	-1.06196	-10.6196	144.609	20.4442	8.59628	0.150033	-203.053	0.300356
41.65	10.816	1	1	3	0	0	-1.06056	0.143836	2.04582	8.59439	-0.203904	17.2072	-1.06056	-10.6056	143.836	20.4582	8.59439	0.15	-203.904	0.300323
41.66	10.826	1	1	3	0	0	-1.0591	0.143407	2.04729	8.59393	-0.195309	17.2068	-1.0591	-10.591	143.407	20.4729	8.59393	0.149992	-195.309	0.300315
41.671	10.837	1	1	3	0	0	-1.05738	0.143215	2.04901	8.59764	-0.202044	17.2105	-1.05738	-10.5738	143.215	20.4901	8.59764	0.150057	-202.044	0.30038
41.682	10.848	1	1	3	0	0	-1.05611	0.142122	2.05028	8.59454	-0.197095	17.2074	-1.05611	-10.5611	142.122	20.5028	8.59454	0.150003	-197.095	0.300325
41.693	10.859	1	1	3	0	0	-1.05445	0.142085	2.05194	8.59566	-0.199668	17.2085	-1.05445	-10.5445	142.085	20.5194	8.59566	0.150023	-199.668	0.300345
41.703	10.869	1	1	3	0	0	-1.05297	0.141968	2.05341	8.59426	-0.19488	17.2071	-1.05297	-10.5297	141.968	20.5341	8.59426	0.149998	-194.88	0.300321
41.714	10.88	1	1	3	0	0	-1.05149	0.140995	2.05489	8.59577	-0.20167	17.2086	-1.05149	-10.5149	140.995	20.5489	8.59577	0.150024	-201.67	0.300347
41.724	10.89	1	1	3	0	0	-1.05045	0.140943	2.05593	8.59439	-0.189903	17.2072	-1.05045	-10.5045	140.943	20.5593	8.59439	0.15	-189.903	0.300323
41.735	10.901	1	1	3	0	0	-1.04908	0.140661	2.05731	8.59503	-0.19277	17.2079	-1.04908	-10.4908	140.661	20.5731	8.59503	0.150012	-192.77	0.300334
41.746	10.912	1	1	3	0	0	-1.0477	0.13991	2.05869	8.59691	-0.20285	17.2098	-1.0477	-10.477	139.91	20.5869	8.59691	0.150044	-202.85	0.300367
41.757	10.923	1	1	3	0	0	-1.04614	0.140068	2.06024	8.59423	-0.213246	17.2071	-1.04614	-10.4614	140.068	20.6024	8.59423	0.149998	-213.246	0.30032
41.767	10.933	1	1	3	0	0	-1.04518	0.138972	2.0612	8.59438	-0.192825	17.2072	-1.04518	-10.4518	138.972	20.612	8.59438	0.15	-192.825	0.300323
41.778	10.944	1	1	3	0	0	-1.04388	0.138628	2.06251	8.59751	-0.201494	17.2104	-1.04388	-10.4388	138.628	20.6251	8.59751	0.150055	-201.494	0.300377
41.788	10.954	1	1	3	0	0	-1.04222	0.138715	2.06416	8.59491	-0.201607	17.2077	-1.04222	-10.4222	138.715	20.6416	8.59491	0.150009	-201.607	0.300332
41.799	10.965	1	1	3	0	0	-1.04048	0.138074	2.0659	8.59524	-0.200263	17.2081	-1.04048	-10.4048	138.074	20.659	8.59524	0.150015	-200.263	0.300338
41.81	10.976	1	1	3	0	0	-1.03894	0.138132	2.06744	8.59438	-0.204929	17.2072	-1.03894	-10.3894	138.132	20.6744	8.59438	0.15	-204.929	0.300323
41.821	10.987	1	1	3	0	0	-1.03754	0.137998	2.06884	8.59512	-0.214163	17.208	-1.03754	-10.3754	137.998	20.6884	8.59512	0.150013	-214.163	0.300336
41.831	10.997	1	1	3	0	0	-1.0359	0.137005	2.07048	8.59441	-0.194122	17.2073	-1.0359	-10.359	137.005	20.7048	8.59441	0.150001	-194.122	0.300323
41.842	11.008	1	1	3	0	0	-1.03444	0.13666	2.07194	8.59436	-0.207236	17.2072	-1.03444	-10.3444	136.66	20.7194	8.59436	0.15	-207.236	0.300322
41.852	11.018	1	1	3	0	0	-1.03308	0.136258	2.07331	8.59476	-0.200797	17.2076	-1.03308	-10.3308	136.258	20.7331	8.59476	0.150007	-200.797	0.300329
41.863	11.029	1	1	3	0	0	-1.031	0.135509	2.07538	8.59531	-0.203307	17.2082	-1.031	-10.31	135.509	20.7538	8.59531	0.150016	-203.307	0.300339
41.874	11.04	1	1	3	0	0	-1.02872	0.135743	2.07766	8.59436	-0.204802	17.2072	-1.02872	-10.2872	135.743	20.7766	8.59436	0.15	-204.802	0.300322
41.885	11.051	1	1	3	0	0	-1.02741	0.135608	2.07897	8.59436	-0.206826	17.2072	-1.02741	-10.2741	135.608	20.7897	8.59436	0.15	-206.826	0.300322
41.895	11.061	1	1	3	0	0	-1.02587	0.134699	2.08051	8.5951	-0.204693	17.2079	-1.02587	-10.2587	134.699	20.8051	8.5951	0.150013	-204.693	0.300335
41.906	11.072	1	1	3	0	0	-1.02388	0.134581	2.08251	8.59436	-0.207599	17.2072	-1.02388	-10.2388	134.581	20.8251	8.59436	0.15	-207.599	0.300322
41.916	11.082	1	1	3	0	0	-1.02233	0.134303	2.08405	8.59532	-0.197838	17.2082	-1.02233	-10.2233	134.303	20.8405	8.59532	0.150017	-197.838	0.300339
41.927	11.093	1	1	3	0	0	-1.02041	0.133749	2.08597	8.59446	-0.206159	17.2073	-1.02041	-10.2041	133.749	20.8597	8.59446	0.150002	-206.159	0.300324
41.938	11.104	1	1	3	0	0	-1.01915	0.133351	2.08723	8.59523	-0.20544	17.2081	-1.01915	-10.1915	133.351	20.8723	8.59523	0.150015	-205.44	0.300337
41.949	11.115	1	1	3	0	0	-1.01707	0.133369	2.08931	8.59435	-0.211639	17.2072	-1.01707	-10.1707	133.369	20.8931	8.59435	0.15	-211.639	0.300322
41.959	11.125	1	1	3	0	0	-1.01538	0.132079	2.091	8.59436	-0.208736	17.2072	-1.01538	-10.1538	132.079	20.91	8.59436	0.15	-208.736	0.300322
41.97	11.136	1	1	3	0	0	-1.01377	0.132182	2.09261	8.59498	-0.209802	17.2078	-1.01377	-10.1377	132.182	20.9261	8.59498	0.150011	-209.802	0.300333
41.98	11.146	1	1	3	0	0	-1.01158	0.131815	2.0948	8.59475	-0.203948	17.2076	-1.01158	-10.1158	131.815	20.948	8.59475	0.150007	-203.948	0.300329
41.991	11.157	1	1	3	0	0	-1.00929	0.131175	2.0971	8.59412	-0.211565	17.207	-1.00929	-10.0929	131.175	20.971	8.59412	0.149996	-211.565	0.300318
42.002	11.168	1	1	3	0	0	-1.00764	0.130812	2.09874	8.59436	-0.208208	17.2072	-1.00764	-10.0764	130.812	20.9874	8.59436	0.15	-208.208	0.300322
42.013	11.179	1	1	3	0	0	-1.0062	0.130179	2.10019	8.59434	-0.202881	17.2072	-1.0062	-10.062	130.179	21.0019	8.59434	0.15	-202.881	0.300322
42.023	11.189	1	1	3	0	0	-1.00415	0.129663	2.10223	8.59535	-0.201432	17.2082	-1.00415	-10.0415	129.663	21.0223	8.59535	0.150017	-201.432	0.300339
42.034	11.2	1	1	3	0	0	-1.00245	0.128676	2.10393	8.59462	-0.201447	17.2075	-1.00245	-10.0245	128.676	21.0393	8.59462	0.150004	-201.447	0.300327
42.044	11.21	1	1	3	0	0	-1.00109	0.128365	2.10529	8.59436	-0.203762	17.2072	-1.00109	-10.0109	128.365	21.0529	8.59436	0.15	-203.762	0.300322
42.055	11.221	1	1	3	0	0	-0.998513	0.127835	2.10787	8.59441	-0.201543	17.2073	-0.998513	-9.98513	127.835	21.0787	8.59441	0.150001	-201.543	0.300323
42.066	11.232	1	1	3	0	0	-0.996277	0.127102	2.11011	8.59436	-0.198196	17.2072	-0.996277	-9.96277	127.102	21.1011	8.59436	0.15	-198.196	0.300322
42.077	11.243	1	1	3	0	0	-0.993978	0.126066	2.1124	8.59436	-0.203183	17.2072	-0.993978	-9.93978	126.066	21.124	8.59436	0.15	-203.183	0.300322
42.087	11.253	1	1	3	0	0	-0.992	0.124951	2.11438	8.59441	-0.200209	17.2073	-0.992	-9.92	124.951	21.1438	8.59441	0.150001	-200.209	0.300323
42.098	11.264	1	1	3	0	0	-0.989569	0.123907	2.11681	8.59444	-0.198599	17.2073	-0.989569	-9.89569	123.907	21.1681	8.59444	0.150001	-198.599	0.300324
42.108	11.274	1	1	3	0	0	-0.986083	0.121642	2.1203	8.5944	-0.200863	17.2072	-0.986083	-9.86083	121.642	21.203	8.5944	0.150001	-200.863	0.300323
42.119	11.285	1	1	3	0	0	-0.981597	0.119888	2.12479	8.59434	-0.196813	17.2072	-0.981597	-9.81597	119.888	21.2479	8.59434	0.15	-196.813	0.300322
42.13	11.296	1	1	3	0	0	-0.97761	0.118506	2.12877	8.59436	-0.193546	17.2072	-0.97761	-9.7761	118.506	21.2877	8.59436	0.15	-193.546	0.300322
42.141	11.307	1	1	3	0	0	-0.973609	0.116258	2.13277	8.59532	-0.194597	17.2082	-0.973609	-9.73609	116.258	21.3277	8.59532	0.150017	-194.597	0.300339
42.151	11.317	1	1	3	0	0	-0.969764	0.114989	2.13662	8.59456	-0.193812	17.2074	-0.969764	-9.69764	114.989	21.3662	8.59456	0.150003	-193.812	0.300326
42.162	11.328	1	1	3	0	0	-0.965591	0.113458	2.14079	8.59435	-0.194569	17.2072	-0.965591	-9.65591	113.458	21.4079	8.59435	0.15	-194.569	0.300322
42.172	11.338	1	1	3	0	0	-0.962067	0.112061	2.14432	8.59436	-0.195126	17.2072	-0.962067	-9.62067	112.061	21.4432	8.59436	0.15	-195.126	0.300322
42.183	11.349	1	1	3	0	0	-0.960068	0.110365	2.14631	8.59436	-0.19356	17.2072	-0.960068	-9.60068	110.365	21.4631	8.59436	0.15	-193.56	0.300322
42.194	11.36	1	1	3	0	0	-0.9566	0.109837	2.14978	8.59436	-0.193015	17.2072	-0.9566	-9.566	109.837	21.4978	8.59436	0.15	-193.015	0.300322
42.205	11.371	1	1	3	0	0	-0.953876	0.10845	2.15251	8.59436	-0.186819	17.2072	-0.953876	-9.53876	108.45	21.5251	8.59436	0.15	-186.819	0.300322
42.215	11.381	1	1	3	0	0	-0.952249	0.10769	2.15413	8.59436	-0.192775	17.2072	-0.952249	-9.52249	107.69	21.5413	8.59436	0.15	-192.775	0.300322
42.226	11.392	1	1	3	0	0	-0.950878	0.106767	2.1555	8.59436	-0.185548	17.2072	-0.950878	-9.50878	106.767	21.555	8.59436	0.15	-185.548	0.300322
42.236	11.402	1	1	3	0	0	-0.949977	0.105232	2.15641	8.59485	-0.193763	17.2077	-0.949977	-9.49977	105.232	21.5641	8.59485	0.150008	-193.763	0.300331
42.247	11.413	1	1	3	0	0	-0.949002	0.104528	2.15738	8.59487	-0.186643	17.2077	-0.949002	-9.49002	104.528	21.5738	8.59487	0.150009	-186.643	0.300331
42.258	11.424	1	1	3	0	0	-0.94763	0.103932	2.15875	8.59436	-0.186821	17.2072	-0.94763	-9.4763	103.932	21.5875	8.59436	0.15	-186.821	0.300322
42.269	11.435	1	1	3	0	0	-0.946322	0.102946	2.16006	8.59436	-0.187972	17.2072	-0.946322	-9.46322	102.946	21.6006	8.59436	0.15	-187.972	0.300322
42.279	11.445	1	1	3	0	0	-0.945319	0.102593	2.16106	8.59436	-0.188856	17.2072	-0.945319	-9.45319	102.593	21.6106	8.59436	0.15	-188.856	0.300322
42.29	11.456	1	1	3	0	0	-0.94424	0.102106	2.16214	8.59436	-0.184813	17.2072	-0.94424	-9.4424	102.106	21.6214	8.59436	0.15	-184.813	0.300322
42.3	11.466	1	1	3	0	0	-0.943322	0.101091	2.16306	8.59436	-0.189541	17.2072	-0.943322	-9.43322	101.091	21.6306	8.59436	0.15	-189.541	0.300322
42.311	11.477	1	1	3	0	0	-0.942505	0.100655	2.16388	8.59436	-0.188912	17.2072	-0.942505	-9.42505	100.655	21.6388	8.59436	0.15	-188.912	0.300322
42.322	11.488	1	1	3	0	0	-0.94176	0.10006	2.16462	8.595	-0.188637	17.2078	-0.94176	-9.4176	100.06	21.6462	8.595	0.150011	-188.637	0.300333
42.333	11.499	1	1	3	0	0	-0.940567	0.099419	2.16582	8.59419	-0.188059	17.207	-0.940567	-9.40567	99.419	21.6582	8.59419	0.149997	-188.059	0.300319
42.343	11.509	1	1	3	0	0	-0.940196	0.0987764	2.16619	8.59436	-0.183283	17.2072	-0.940196	-9.40196	98.7764	21.6619	8.59436	0.15	-183.283	0.300322
42.354	11.52	1	1	3	0	0	-0.938831	0.0986995	2.16755	8.59439	-0.182615	17.2072	-0.938831	-9.38831	98.6995	21.6755	8.59439	0.15	-182.615	0.300323
42.364	11.53	1	1	3	0	0	-0.93798	0.098048	2.1684	8.59436	-0.189081	17.2072	-0.93798	-9.3798	98.048	21.684	8.59436	0.15	-189.081	0.300322
42.375	11.541	1	1	3	0	0	-0.937404	0.0973617	2.16898	8.59436	-0.185774	17.2072	-0.937404	-9.37404	97.3617	21.6898	8.59436	0.15	-185.774	0.300322
42.386	11.552	1	1	3	0	0	-0.936367	0.0970513	2.17002	8.59436	-0.187466	17.2072	-0.936367	-9.36367	97.0513	21.7002	8.59436	0.15	-187.466	0.300322
42.397	11.563	1	1	3	0	0	-0.934723	0.0968172	2.17166	8.59436	-0.184309	17.2072	-0.934723	-9.34723	96.8172	21.7166	8.59436	0.15	-184.309	0.300322
42.407	11.573	1	1	3	0	0	-0.933609	0.0966783	2.17277	8.59436	-0.183378	17.2072	-0.933609	-9.33609	96.6783	21.7277	8.59436	0.15	-183.378	0.300322
42.418	11.584	1	1	3	0	0	-0.932627	0.0958957	2.17376	8.59436	-0.183821	17.2072	-0.932627	-9.32627	95.8957	21.7376	8.59436	0.15	-183.821	0.300322
42.428	11.594	1	1	3	0	0	-0.931417	0.0957074	2.17497	8.5944	-0.1858	17.2072	-0.931417	-9.31417	95.7074	21.7497	8.5944	0.150001	-185.8	0.300323
42.439	11.605	1	1	3	0	0	-0.930429	0.0955841	2.17595	8.59436	-0.183495	17.2072	-0.930429	-9.30429	95.5841	21.7595	8.59436	0.15	-183.495	0.300322
42.45	11.616	1	1	3	0	0	-0.929044	0.0949983	2.17734	8.59436	-0.18247	17.2072	-0.929044	-9.29044	94.9983	21.7734	8.59436	0.15	-182.47	0.300322
42.461	11.627	1	1	3	0	0	-0.928174	0.0949276	2.17821	8.59436	-0.181525	17.2072	-0.928174	-9.28174	94.9276	21.7821	8.59436	0.15	-181.525	0.300322
42.471	11.637	1	1	3	0	0	-0.927198	0.0948473	2.17918	8.59436	-0.18687	17.2072	-0.927198	-9.27198	94.8473	21.7918	8.59436	0.15	-186.87	0.300322
42.482	11.648	1	1	3	0	0	-0.9258	0.0944899	2.18058	8.59436	-0.186203	17.2072	-0.9258	-9.258	94.4899	21.8058	8.59436	0.15	-186.203	0.300322
42.492	11.658	1	1	3	0	0	-0.924594	0.0946285	2.18179	8.59436	-0.179442	17.2072	-0.924594	-9.24594	94.6285	21.8179	8.59436	0.15	-179.442	0.300322
42.503	11.669	1	1	3	0	0	-0.923738	0.0946296	2.18264	8.59436	-0.180191	17.2072	-0.923738	-9.23738	94.6296	21.8264	8.59436	0.15	-180.191	0.300322
42.514	11.68	1	1	3	0	0	-0.922313	0.0942557	2.18407	8.59436	-0.186936	17.2072	-0.922313	-9.22313	94.2557	21.8407	8.59436	0.15	-186.936	0.300322
42.525	11.691	1	1	3	0	0	-0.921056	0.0941622	2.18533	8.59436	-0.18861	17.2072	-0.921056	-9.21056	94.1622	21.8533	8.59436	0.15	-188.61	0.300322
42.535	11.701	1	1	3	0	0	-0.920073	0.0943036	2.18631	8.59436	-0.183497	17.2072	-0.920073	-9.20073	94.3036	21.8631	8.59436	0.15	-183.497	0.300322
42.546	11.712	1	1	3	0	0	-0.918792	0.0941749	2.18759	8.59436	-0.182517	17.2072	-0.918792	-9.18792	94.1749	21.8759	8.59436	0.15	-182.517	0.300322
42.557	11.723	1	1	3	0	0	-0.917785	0.0939089	2.1886	8.59436	-0.189024	17.2072	-0.917785	-9.17785	93.9089	21.886	8.59436	0.15	-189.024	0.300322
42.568	11.734	1	1	3	0	0	-0.916615	0.0940083	2.18977	8.59436	-0.18519	17.2072	-0.916615	-9.16615	94.0083	21.8977	8.59436	0.15	-185.19	0.300322
42.578	11.744	1	1	3	0	0	-0.915322	0.0936713	2.19106	8.59436	-0.187253	17.2072	-0.915322	-9.15322	93.6713	21.9106	8.59436	0.15	-187.253	0.300322
42.589	11.755	1	1	3	0	0	-0.914347	0.0937258	2.19204	8.59486	-0.190589	17.2077	-0.914347	-9.14347	93.7258	21.9204	8.59486	0.150009	-190.589	0.300331
42.599	11.765	1	1	3	0	0	-0.913273	0.0937115	2.19311	8.59527	-0.180777	17.2081	-0.913273	-9.13273	93.7115	21.9311	8.59527	0.150016	-180.777	0.300338
42.61	11.776	1	1	3	0	0	-0.911398	0.093537	2.19498	8.59436	-0.185912	17.2072	-0.911398	-9.11398	93.537	21.9498	8.59436	0.15	-185.912	0.300322
42.621	11.787	1	1	3	0	0	-0.910148	0.0936762	2.19623	8.59436	-0.187904	17.2072	-0.910148	-9.10148	93.6762	21.9623	8.59436	0.15	-187.904	0.300322
42.632	11.798	1	1	3	0	0	-0.908762	0.0936185	2.19762	8.59436	-0.187668	17.2072	-0.908762	-9.08762	93.6185	21.9762	8.59436	0.15	-187.668	0.300322
42.642	11.808	1	1	3	0	0	-0.907359	0.0931443	2.19902	8.59436	-0.187877	17.2072	-0.907359	-9.07359	93.1443	21.9902	8.59436	0.15	-187.877	0.300322
42.653	11.819	1	1	3	0	0	-0.905414	0.0935973	2.20097	8.59436	-0.186969	17.2072	-0.905414	-9.05414	93.5973	22.0097	8.59436	0.15	-186.969	0.300322
42.663	11.829	1	1	3	0	0	-0.904397	0.0935693	2.20199	8.59436	-0.179894	17.2072	-0.904397	-9.04397	93.5693	22.0199	8.59436	0.15	-179.894	0.300322
42.674	11.84	1	1	3	0	0	-0.902577	0.0933665	2.20381	8.59436	-0.187558	17.2072	-0.902577	-9.02577	93.3665	22.0381	8.59436	0.15	-187.558	0.300322
42.685	11.851	1	1	3	0	0	-0.90106	0.093418	2.20532	8.59436	-0.185269	17.2072	-0.90106	-9.0106	93.418	22.0532	8.59436	0.15	-185.269	0.300322
42.696	11.862	1	1	3	0	0	-0.899712	0.0930787	2.20667	8.59436	-0.189506	17.2072	-0.899712	-8.99712	93.0787	22.0667	8.59436	0.15	-189.506	0.300322
42.706	11.872	1	1	3	0	0	-0.898473	0.0928569	2.20791	8.59436	-0.184121	17.2072	-0.898473	-8.98473	92.8569	22.0791	8.59436	0.15	-184.121	0.300322
42.717	11.883	1	1	3	0	0	-0.896641	0.0930662	2.20974	8.59436	-0.190007	17.2072	-0.896641	-8.96641	93.0662	22.0974	8.59436	0.15	-190.007	0.300322
42.727	11.893	1	1	3	0	0	-0.894978	0.0928329	2.2114	8.59436	-0.187301	17.2072	-0.894978	-8.94978	92.8329	22.114	8.59436	0.15	-187.301	0.300322
42.738	11.904	1	1	3	0	0	-0.893198	0.0927136	2.21318	8.59436	-0.192853	17.2072	-0.893198	-8.93198	92.7136	22.1318	8.59436	0.15	-192.853	0.300322
42.749	11.915	1	1	3	0	0	-0.891439	0.0928919	2.21494	8.59436	-0.185149	17.2072	-0.891439	-8.91439	92.8919	22.1494	8.59436	0.15	-185.149	0.300322
42.76	11.926	1	1	3	0	0	-0.889978	0.0923423	2.2164	8.59436	-0.186947	17.2072	-0.889978	-8.89978	92.3423	22.164	8.59436	0.15	-186.947	0.300322
42.77	11.936	1	1	3	0	0	-0.888115	0.0925377	2.21827	8.59436	-0.18285	17.2072	-0.888115	-8.88115	92.5377	22.1827	8.59436	0.15	-182.85	0.300322
42.781	11.947	1	1	3	0	0	-0.886369	0.0927942	2.22001	8.59436	-0.190088	17.2072	-0.886369	-8.86369	92.7942	22.2001	8.59436	0.15	-190.088	0.300322
42.791	11.957	1	1	3	0	0	-0.88461	0.0923246	2.22177	8.59436	-0.182658	17.2072	-0.88461	-8.8461	92.3246	22.2177	8.59436	0.15	-182.658	0.300322
42.802	11.968	1	1	3	0	0	-0.882779	0.0925128	2.2236	8.59372	-0.187916	17.2066	-0.882779	-8.82779	92.5128	22.236	8.59372	0.149989	-187.916	0.300311
42.813	11.979	1	1	3	0	0	-0.880959	0.0925212	2.22542	8.59436	-0.184455	17.2072	-0.880959	-8.80959	92.5212	22.2542	8.59436	0.15	-184.455	0.300322
42.824	11.99	1	1	3	0	0	-0.879275	0.0917674	2.22711	8.59422	-0.18599	17.2071	-0.879275	-8.79275	91.7674	22.2711	8.59422	0.149997	-185.99	0.30032
42.834	12	1	1	3	0	0	-0.877262	0.0918134	2.22912	8.59436	-0.190987	17.2072	-0.877262	-8.77262	91.8134	22.2912	8.59436	0.15	-190.987	0.300322
42.845	12.011	1	1	3	0	0	-0.875404	0.0918549	2.23098	8.59436	-0.191966	17.2072	-0.875404	-8.75404	91.8549	22.3098	8.59436	0.15	-191.966	0.300322
42.855	12.021	1	1	3	0	0	-0.873498	0.0915144	2.23288	8.59436	-0.188545	17.2072	-0.873498	-8.73498	91.5144	22.3288	8.59436	0.15	-188.545	0.300322
42.866	12.032	1	1	3	0	0	-0.871454	0.0914121	2.23493	8.59436	-0.188998	17.2072	-0.871454	-8.71454	91.4121	22.3493	8.59436	0.15	-188.998	0.300322
42.877	12.043	1	1	3	0	0	-0.869459	0.0913859	2.23692	8.59436	-0.181554	17.2072	-0.869459	-8.69459	91.3859	22.3692	8.59436	0.15	-181.554	0.300322
42.888	12.054	1	1	3	0	0	-0.867757	0.0906264	2.23863	8.59436	-0.184455	17.2072	-0.867757	-8.67757	90.6264	22.3863	8.59436	0.15	-184.455	0.300322
42.898	12.064	1	1	3	0	0	-0.865609	0.0907642	2.24077	8.59436	-0.187294	17.2072	-0.865609	-8.65609	90.7642	22.4077	8.59436	0.15	-187.294	0.300322
42.909	12.075	1	1	3	0	0	-0.863879	0.090671	2.2425	8.59454	-0.190799	17.2074	-0.863879	-8.63879	90.671	22.425	8.59454	0.150003	-190.799	0.300326
42.919	12.085	1	1	3	0	0	-0.862593	0.0897262	2.24379	8.59436	-0.18721	17.2072	-0.862593	-8.62593	89.7262	22.4379	8.59436	0.15	-187.21	0.300322
42.93	12.096	1	1	3	0	0	-0.860495	0.0898673	2.24589	8.59436	-0.188726	17.2072	-0.860495	-8.60495	89.8673	22.4589	8.59436	0.15	-188.726	0.300322
42.941	12.107	1	1	3	0	0	-0.858061	0.0898732	2.24832	8.59436	-0.182243	17.2072	-0.858061	-8.58061	89.8732	22.4832	8.59436	0.15	-182.243	0.300322
42.952	12.118	1	1	3	0	0	-0.855775	0.0893917	2.25061	8.59436	-0.184493	17.2072	-0.855775	-8.55775	89.3917	22.5061	8.59436	0.15	-184.493	0.300322
42.962	12.128	1	1	3	0	0	-0.854098	0.0890814	2.25228	8.59436	-0.191279	17.2072	-0.854098	-8.54098	89.0814	22.5228	8.59436	0.15	-191.279	0.300322
42.973	12.139	1	1	3	0	0	-0.851844	0.0889283	2.25454	8.59436	-0.189665	17.2072	-0.851844	-8.51844	88.9283	22.5454	8.59436	0.15	-189.665	0.300322
42.983	12.149	1	1	3	0	0	-0.849922	0.0882878	2.25646	8.59436	-0.190898	17.2072	-0.849922	-8.49922	88.2878	22.5646	8.59436	0.15	-190.898	0.300322
42.994	12.16	1	1	3	0	0	-0.847745	0.0878698	2.25864	8.59436	-0.191222	17.2072	-0.847745	-8.47745	87.8698	22.5864	8.59436	0.15	-191.222	0.300322
43.005	12.171	1	1	3	0	0	-0.845981	0.0873133	2.2604	8.59433	-0.190128	17.2072	-0.845981	-8.45981	87.3133	22.604	8.59433	0.149999	-190.128	0.300322
43.016	12.182	1	1	3	0	0	-0.842908	0.0872097	2.26347	8.59436	-0.187227	17.2072	-0.842908	-8.42908	87.2097	22.6347	8.59436	0.15	-187.227	0.300322
43.026	12.192	1	1	3	0	0	-0.840767	0.0869644	2.26562	8.59436	-0.187444	17.2072	-0.840767	-8.40767	86.9644	22.6562	8.59436	0.15	-187.444	0.300322
43.037	12.203	1	1	3	0	0	-0.839072	0.0860723	2.26731	8.59436	-0.188642	17.2072	-0.839072	-8.39072	86.0723	22.6731	8.59436	0.15	-188.642	0.300322
43.047	12.213	1	1	3	0	0	-0.836769	0.0858091	2.26961	8.59436	-0.186535	17.2072	-0.836769	-8.36769	85.8091	22.6961	8.59436	0.15	-186.535	0.300322
43.058	12.224	1	1	3	0	0	-0.83442	0.085259	2.27196	8.59436	-0.185026	17.2072	-0.83442	-8.3442	85.259	22.7196	8.59436	0.15	-185.026	0.300322
43.069	12.235	1	1	3	0	0	-0.832922	0.0842396	2.27346	8.59436	-0.185202	17.2072	-0.832922	-8.32922	84.2396	22.7346	8.59436	0.15	-185.202	0.300322
43.08	12.246	1	1	3	0	0	-0.830544	0.0840991	2.27584	8.59434	-0.185582	17.2072	-0.830544	-8.30544	84.0991	22.7584	8.59434	0.15	-185.582	0.300322
43.09	12.256	1	1	3	0	0	-0.828821	0.0837446	2.27756	8.59436	-0.187012	17.2072	-0.828821	-8.28821	83.7446	22.7756	8.59436	0.15	-187.012	0.300322
43.101	12.267	1	1	3	0	0	-0.826668	0.0829866	2.27971	8.59436	-0.187295	17.2072	-0.826668	-8.26668	82.9866	22.7971	8.59436	0.15	-187.295	0.300322
43.111	12.277	1	1	3	0	0	-0.824681	0.082936	2.2817	8.59436	-0.180589	17.2072	-0.824681	-8.24681	82.936	22.817	8.59436	0.15	-180.589	0.300322
43.122	12.288	1	1	3	0	0	-0.822944	0.0825157	2.28344	8.59436	-0.183454	17.2072	-0.822944	-8.22944	82.5157	22.8344	8.59436	0.15	-183.454	0.300322
43.133	12.299	1	1	3	0	0	-0.820939	0.0817817	2.28544	8.59436	-0.184275	17.2072	-0.820939	-8.20939	81.7817	22.8544	8.59436	0.15	-184.275	0.300322
43.144	12.31	1	1	3	0	0	-0.819534	0.0815342	2.28685	8.59436	-0.181717	17.2072	-0.819534	-8.19534	81.5342	22.8685	8.59436	0.15	-181.717	0.300322
43.154	12.32	1	1	3	0	0	-0.817465	0.0814944	2.28892	8.59436	-0.182902	17.2072	-0.817465	-8.17465	81.4944	22.8892	8.59436	0.15	-182.902	0.300322
43.165	12.331	1	1	3	0	0	-0.815782	0.0807484	2.2906	8.59452	-0.181506	17.2074	-0.815782	-8.15782	80.7484	22.906	8.59452	0.150003	-181.506	0.300325
43.175	12.341	1	1	3	0	0	-0.81366	0.0806599	2.29272	8.59436	-0.18477	17.2072	-0.81366	-8.1366	80.6599	22.9272	8.59436	0.15	-184.77	0.300322
43.186	12.352	1	1	3	0	0	-0.811823	0.0804253	2.29456	8.59436	-0.182099	17.2072	-0.811823	-8.11823	80.4253	22.9456	8.59436	0.15	-182.099	0.300322
43.197	12.363	1	1	3	0	0	-0.810111	0.0796548	2.29627	8.59431	-0.180529	17.2072	-0.810111	-8.10111	79.6548	22.9627	8.59431	0.149999	-180.529	0.300321
43.208	12.374	1	1	3	0	0	-0.808322	0.0793579	2.29806	8.59436	-0.176255	17.2072	-0.808322	-8.08322	79.3579	22.9806	8.59436	0.15	-176.255	0.300322
43.218	12.384	1	1	3	0	0	-0.80689	0.079221	2.29949	8.59436	-0.178774	17.2072	-0.80689	-8.0689	79.221	22.9949	8.59436	0.15	-178.774	0.300322
43.229	12.395	1	1	3	0	0	-0.804781	0.0787163	2.3016	8.59436	-0.179077	17.2072	-0.804781	-8.04781	78.7163	23.016	8.59436	0.15	-179.077	0.300322
43.239	12.405	1	1	3	0	0	-0.803514	0.0781797	2.30287	8.59436	-0.181603	17.2072	-0.803514	-8.03514	78.1797	23.0287	8.59436	0.15	-181.603	0.300322
43.25	12.416	1	1	3	0	0	-0.801929	0.0778411	2.30445	8.59436	-0.180823	17.2072	-0.801929	-8.01929	77.8411	23.0445	8.59436	0.15	-180.823	0.300322
43.261	12.427	1	1	3	0	0	-0.79985	0.0776209	2.30653	8.59436	-0.184229	17.2072	-0.79985	-7.9985	77.6209	23.0653	8.59436	0.15	-184.229	0.300322
43.272	12.438	1	1	3	0	0	-0.798152	0.0774245	2.30823	8.59436	-0.180387	17.2072	-0.798152	-7.98152	77.4245	23.0823	8.59436	0.15	-180.387	0.300322
43.282	12.448	1	1	3	0	0	-0.797402	0.076828	2.30898	8.59436	-0.182812	17.2072	-0.797402	-7.97402	76.828	23.0898	8.59436	0.15	-182.812	0.300322
43.293	12.459	1	1	3	0	0	-0.795471	0.0765292	2.31091	8.59436	-0.181635	17.2072	-0.795471	-7.95471	76.5292	23.1091	8.59436	0.15	-181.635	0.300322
43.303	12.469	1	1	3	0	0	-0.793792	0.0766396	2.31259	8.59451	-0.17832	17.2073	-0.793792	-7.93792	76.6396	23.1259	8.59451	0.150002	-178.32	0.300325
43.314	12.48	1	1	3	0	0	-0.791185	0.0767635	2.3152	8.59436	-0.179608	17.2072	-0.791185	-7.91185	76.7635	23.152	8.59436	0.15	-179.608	0.300322
43.325	12.491	1	1	3	0	0	-0.790356	0.076002	2.31603	8.59436	-0.183228	17.2072	-0.790356	-7.90356	76.002	23.1603	8.59436	0.15	-183.228	0.300322
43.336	12.502	1	1	3	0	0	-0.788546	0.0759144	2.31784	8.59436	-0.180803	17.2072	-0.788546	-7.88546	75.9144	23.1784	8.59436	0.15	-180.803	0.300322
43.346	12.512	1	1	3	0	0	-0.786997	0.0757369	2.31939	8.59436	-0.180502	17.2072	-0.786997	-7.86997	75.7369	23.1939	8.59436	0.15	-180.502	0.300322
43.357	12.523	1	1	3	0	0	-0.785278	0.0754489	2.3211	8.59436	-0.177501	17.2072	-0.785278	-7.85278	75.4489	23.211	8.59436	0.15	-177.501	0.300322
43.367	12.533	1	1	3	0	0	-0.784111	0.0754098	2.32227	8.59431	-0.182129	17.2072	-0.784111	-7.84111	75.4098	23.2227	8.59431	0.149999	-182.129	0.300321
43.378	12.544	1	1	3	0	0	-0.782602	0.0747562	2.32378	8.59436	-0.179537	17.2072	-0.782602	-7.82602	74.7562	23.2378	8.59436	0.15	-179.537	0.300322
43.389	12.555	1	1	3	0	0	-0.781115	0.0749676	2.32527	8.59439	-0.181084	17.2072	-0.781115	-7.81115	74.9676	23.2527	8.59439	0.15	-181.084	0.300323
43.4	12.566	1	1	3	0	0	-0.779871	0.0746767	2.32651	8.5937	-0.178095	17.2065	-0.779871	-7.79871	74.6767	23.2651	8.5937	0.149988	-178.095	0.300311
43.41	12.576	1	1	3	0	0	-0.778082	0.0742405	2.3283	8.59436	-0.179623	17.2072	-0.778082	-7.78082	74.2405	23.283	8.59436	0.15	-179.623	0.300322
43.421	12.587	1	1	3	0	0	-0.776623	0.0743901	2.32976	8.59436	-0.175526	17.2072	-0.776623	-7.76623	74.3901	23.2976	8.59436	0.15	-175.526	0.300322
43.432	12.598	1	1	3	0	0	-0.774921	0.0746263	2.33146	8.59437	-0.174066	17.2072	-0.774921	-7.74921	74.6263	23.3146	8.59437	0.15	-174.066	0.300322
43.443	12.609	1	1	3	0	0	-0.773656	0.0738664	2.33273	8.59436	-0.173894	17.2072	-0.773656	-7.73656	73.8664	23.3273	8.59436	0.15	-173.894	0.300322
43.453	12.619	1	1	3	0	0	-0.772333	0.0741373	2.33405	8.59436	-0.186384	17.2072	-0.772333	-7.72333	74.1373	23.3405	8.59436	0.15	-186.384	0.300322
43.464	12.63	1	1	3	0	0	-0.770746	0.0741048	2.33564	8.59436	-0.1796	17.2072	-0.770746	-7.70746	74.1048	23.3564	8.59436	0.15	-179.6	0.300322
43.474	12.64	1	1	3	0	0	-0.768922	0.0738514	2.33746	8.59436	-0.186686	17.2072	-0.768922	-7.68922	73.8514	23.3746	8.59436	0.15	-186.686	0.300322
43.485	12.651	1	1	3	0	0	-0.767336	0.0741772	2.33905	8.59437	-0.177654	17.2072	-0.767336	-7.67336	74.1772	23.3905	8.59437	0.15	-177.654	0.300322
43.496	12.662	1	1	3	0	0	-0.765959	0.0740427	2.34042	8.59436	-0.178223	17.2072	-0.765959	-7.65959	74.0427	23.4042	8.59436	0.15	-178.223	0.300322
43.507	12.673	1	1	3	0	0	-0.76471	0.0736249	2.34167	8.59432	-0.17319	17.2072	-0.76471	-7.6471	73.6249	23.4167	8.59432	0.149999	-173.19	0.300322
43.517	12.683	1	1	3	0	0	-0.762795	0.0737868	2.34359	8.59436	-0.181984	17.2072	-0.762795	-7.62795	73.7868	23.4359	8.59436	0.15	-181.984	0.300322
43.528	12.694	1	1	3	0	0	-0.761222	0.0740028	2.34516	8.59363	-0.175688	17.2065	-0.761222	-7.61222	74.0028	23.4516	8.59363	0.149987	-175.688	0.30031
43.538	12.704	1	1	3	0	0	-0.759438	0.0736881	2.34694	8.59436	-0.18428	17.2072	-0.759438	-7.59438	73.6881	23.4694	8.59436	0.15	-184.28	0.300322
43.549	12.715	1	1	3	0	0	-0.757973	0.0738594	2.34841	8.5945	-0.180437	17.2073	-0.757973	-7.57973	73.8594	23.4841	8.5945	0.150002	-180.437	0.300325
43.56	12.726	1	1	3	0	0	-0.75648	0.0738449	2.3499	8.59436	-0.180093	17.2072	-0.75648	-7.5648	73.8449	23.499	8.59436	0.15	-180.093	0.300322
43.571	12.737	1	1	3	0	0	-0.754705	0.0736635	2.35168	8.59247	-0.179745	17.2053	-0.754705	-7.54705	73.6635	23.5168	8.59247	0.149967	-179.745	0.300289
43.581	12.747	1	1	3	0	0	-0.753193	0.0738846	2.35319	8.59436	-0.178802	17.2072	-0.753193	-7.53193	73.8846	23.5319	8.59436	0.15	-178.802	0.300322
43.592	12.758	1	1	3	0	0	-0.751554	0.0738142	2.35483	8.59436	-0.180672	17.2072	-0.751554	-7.51554	73.8142	23.5483	8.59436	0.15	-180.672	0.300322
43.602	12.768	1	1	3	0	0	-0.74962	0.0736755	2.35676	8.59436	-0.177994	17.2072	-0.74962	-7.4962	73.6755	23.5676	8.59436	0.15	-177.994	0.300322
43.613	12.779	1	1	3	0	0	-0.747862	0.0738834	2.35852	8.59431	-0.181981	17.2072	-0.747862	-7.47862	73.8834	23.5852	8.59431	0.149999	-181.981	0.300321
43.624	12.79	1	1	3	0	0	-0.746398	0.073891	2.35998	8.59434	-0.180788	17.2072	-0.746398	-7.46398	73.891	23.5998	8.59434	0.15	-180.788	0.300322
43.635	12.801	1	1	3	0	0	-0.744323	0.0737845	2.36206	8.59321	-0.184755	17.206	-0.744323	-7.44323	73.7845	23.6206	8.59321	0.14998	-184.755	0.300302
43.645	12.811	1	1	3	0	0	-0.743055	0.0739161	2.36333	8.59439	-0.17776	17.2072	-0.743055	-7.43055	73.9161	23.6333	8.59439	0.15	-177.76	0.300323
43.656	12.822	1	1	3	0	0	-0.741729	0.0735082	2.36465	8.59436	-0.17511	17.2072	-0.741729	-7.41729	73.5082	23.6465	8.59436	0.15	-175.11	0.300322
43.666	12.832	1	1	3	0	0	-0.740445	0.0734033	2.36594	8.59346	-0.174962	17.2063	-0.740445	-7.40445	73.4033	23.6594	8.59346	0.149984	-174.962	0.300307
43.677	12.843	1	1	3	0	0	-0.738696	0.0737467	2.36769	8.59419	-0.178715	17.207	-0.738696	-7.38696	73.7467	23.6769	8.59419	0.149997	-178.715	0.300319
43.688	12.854	1	1	3	0	0	-0.737233	0.0732232	2.36915	8.59434	-0.18253	17.2072	-0.737233	-7.37233	73.2232	23.6915	8.59434	0.15	-182.53	0.300322
43.699	12.865	1	1	3	0	0	-0.735699	0.0736879	2.37068	8.59436	-0.189392	17.2072	-0.735699	-7.35699	73.6879	23.7068	8.59436	0.15	-189.392	0.300322
43.709	12.875	1	1	3	0	0	-0.733979	0.0738157	2.3724	8.59436	-0.175878	17.2072	-0.733979	-7.33979	73.8157	23.724	8.59436	0.15	-175.878	0.300322
43.72	12.886	1	1	3	0	0	-0.732276	0.073536	2.37411	8.59446	-0.176935	17.2073	-0.732276	-7.32276	73.536	23.7411	8.59446	0.150002	-176.935	0.300324
43.73	12.896	1	1	3	0	0	-0.730575	0.0738848	2.37581	8.59436	-0.180096	17.2072	-0.730575	-7.30575	73.8848	23.7581	8.59436	0.15	-180.096	0.300322
43.741	12.907	1	1	3	0	0	-0.728769	0.0740481	2.37761	8.5945	-0.182697	17.2073	-0.728769	-7.28769	74.0481	23.7761	8.5945	0.150002	-182.697	0.300325
43.752	12.918	1	1	3	0	0	-0.727133	0.0736606	2.37925	8.59433	-0.174701	17.2072	-0.727133	-7.27133	73.6606	23.7925	8.59433	0.149999	-174.701	0.300322
43.763	12.929	1	1	3	0	0	-0.725656	0.0739553	2.38073	8.59436	-0.176098	17.2072	-0.725656	-7.25656	73.9553	23.8073	8.59436	0.15	-176.098	0.300322
43.773	12.939	1	1	3	0	0	-0.7239	0.0740252	2.38248	8.59436	-0.178127	17.2072	-0.7239	-7.239	74.0252	23.8248	8.59436	0.15	-178.127	0.300322
43.784	12.95	1	1	3	0	0	-0.72186	0.0739828	2.38452	8.59298	-0.177609	17.2058	-0.72186	-7.2186	73.9828	23.8452	8.59298	0.149976	-177.609	0.300298
43.794	12.96	1	1	3	0	0	-0.719938	0.0742422	2.38644	8.59335	-0.170655	17.2062	-0.719938	-7.19938	74.2422	23.8644	8.59335	0.149982	-170.655	0.300305
43.805	12.971	1	1	3	0	0	-0.718503	0.0743148	2.38788	8.59436	-0.174261	17.2072	-0.718503	-7.18503	74.3148	23.8788	8.59436	0.15	-174.261	0.300322
43.816	12.982	1	1	3	0	0	-0.716462	0.0740594	2.38992	8.59436	-0.177434	17.2072	-0.716462	-7.16462	74.0594	23.8992	8.59436	0.15	-177.434	0.300322
43.827	12.993	1	1	3	0	0	-0.714981	0.0739672	2.3914	8.59436	-0.179845	17.2072	-0.714981	-7.14981	73.9672	23.914	8.59436	0.15	-179.845	0.300322
43.837	13.003	1	1	3	0	0	-0.712732	0.074504	2.39365	8.59451	-0.17273	17.2073	-0.712732	-7.12732	74.504	23.9365	8.59451	0.150002	-172.73	0.300325
43.848	13.014	1	1	3	0	0	-0.711091	0.0741552	2.39529	8.59436	-0.177741	17.2072	-0.711091	-7.11091	74.1552	23.9529	8.59436	0.15	-177.741	0.300322
43.858	13.024	1	1	3	0	0	-0.709479	0.0741817	2.3969	8.59434	-0.175312	17.2072	-0.709479	-7.09479	74.1817	23.969	8.59434	0.15	-175.312	0.300322
43.869	13.035	1	1	3	0	0	-0.707487	0.0745858	2.3989	8.59433	-0.178206	17.2072	-0.707487	-7.07487	74.5858	23.989	8.59433	0.149999	-178.206	0.300322
43.88	13.046	1	1	3	0	0	-0.705687	0.0742153	2.4007	8.59436	-0.177457	17.2072	-0.705687	-7.05687	74.2153	24.007	8.59436	0.15	-177.457	0.300322
43.891	13.057	1	1	3	0	0	-0.704066	0.0742879	2.40232	8.59436	-0.183498	17.2072	-0.704066	-7.04066	74.2879	24.0232	8.59436	0.15	-183.498	0.300322
43.901	13.067	1	1	3	0	0	-0.701915	0.0747089	2.40447	8.59334	-0.178698	17.2062	-0.701915	-7.01915	74.7089	24.0447	8.59334	0.149982	-178.698	0.300304
43.912	13.078	1	1	3	0	0	-0.699867	0.0744145	2.40652	8.59436	-0.18158	17.2072	-0.699867	-6.99867	74.4145	24.0652	8.59436	0.15	-181.58	0.300322
43.922	13.088	1	1	3	0	0	-0.698913	0.0741699	2.40747	8.59436	-0.17754	17.2072	-0.698913	-6.98913	74.1699	24.0747	8.59436	0.15	-177.54	0.300322
43.933	13.099	1	1	3	0	0	-0.696863	0.0745388	2.40952	8.59436	-0.174547	17.2072	-0.696863	-6.96863	74.5388	24.0952	8.59436	0.15	-174.547	0.300322
43.944	13.11	1	1	3	0	0	-0.694674	0.0743207	2.41171	8.59466	-0.18294	17.2075	-0.694674	-6.94674	74.3207	24.1171	8.59466	0.150005	-182.94	0.300327
43.955	13.121	1	1	3	0	0	-0.692586	0.0745519	2.4138	8.59436	-0.184147	17.2072	-0.692586	-6.92586	74.5519	24.138	8.59436	0.15	-184.147	0.300322
43.965	13.131	1	1	3	0	0	-0.691353	0.0741351	2.41503	8.59436	-0.179099	17.2072	-0.691353	-6.91353	74.1351	24.1503	8.59436	0.15	-179.099	0.300322
43.976	13.142	1	1	3	0	0	-0.689586	0.0740784	2.4168	8.59268	-0.18287	17.2055	-0.689586	-6.89586	74.0784	24.168	8.59268	0.14997	-182.87	0.300293
43.986	13.152	1	1	3	0	0	-0.687959	0.0744024	2.41842	8.59385	-0.181472	17.2067	-0.687959	-6.87959	74.4024	24.1842	8.59385	0.149991	-181.472	0.300313
43.997	13.163	1	1	3	0	0	-0.686073	0.0741386	2.42031	8.59434	-0.18813	17.2072	-0.686073	-6.86073	74.1386	24.2031	8.59434	0.15	-188.13	0.300322
44.008	13.174	1	1	3	0	0	-0.684674	0.074036	2.42171	8.59367	-0.18169	17.2065	-0.684674	-6.84674	74.036	24.2171	8.59367	0.149988	-181.69	0.30031
44.019	13.185	1	1	3	0	0	-0.682428	0.0743025	2.42395	8.59428	-0.17714	17.2071	-0.682428	-6.82428	74.3025	24.2395	8.59428	0.149998	-177.14	0.300321
44.029	13.195	1	1	3	0	0	-0.680919	0.0741275	2.42546	8.59432	-0.178387	17.2072	-0.680919	-6.80919	74.1275	24.2546	8.59432	0.149999	-178.387	0.300322
44.04	13.206	1	1	3	0	0	-0.678891	0.0744074	2.42749	8.59201	-0.179364	17.2048	-0.678891	-6.78891	74.4074	24.2749	8.59201	0.149959	-179.364	0.300281
44.05	13.216	1	1	3	0	0	-0.677061	0.0745273	2.42932	8.59438	-0.180077	17.2072	-0.677061	-6.77061	74.5273	24.2932	8.59438	0.15	-180.077	0.300323
44.061	13.227	1	1	3	0	0	-0.675511	0.0741681	2.43087	8.59426	-0.180231	17.2071	-0.675511	-6.75511	74.1681	24.3087	8.59426	0.149998	-180.231	0.300321
44.072	13.238	1	1	3	0	0	-0.673657	0.0744064	2.43273	8.59433	-0.181414	17.2072	-0.673657	-6.73657	74.4064	24.3273	8.59433	0.149999	-181.414	0.300322
44.083	13.249	1	1	3	0	0	-0.672731	0.0743252	2.43365	8.59358	-0.177966	17.2064	-0.672731	-6.72731	74.3252	24.3365	8.59358	0.149986	-177.966	0.300309
44.093	13.259	1	1	3	0	0	-0.670978	0.0741572	2.4354	8.59279	-0.189342	17.2056	-0.670978	-6.70978	74.1572	24.354	8.59279	0.149973	-189.342	0.300295
44.104	13.27	1	1	3	0	0	-0.669581	0.0743055	2.4368	8.59439	-0.180658	17.2072	-0.669581	-6.69581	74.3055	24.368	8.59439	0.15	-180.658	0.300323
44.114	13.28	1	1	3	0	0	-0.667144	0.0747854	2.43924	8.59344	-0.187888	17.2063	-0.667144	-6.67144	74.7854	24.3924	8.59344	0.149984	-187.888	0.300306
44.125	13.291	1	1	3	0	0	-0.665247	0.074507	2.44114	8.59237	-0.183526	17.2052	-0.665247	-6.65247	74.507	24.4114	8.59237	0.149965	-183.526	0.300288
44.136	13.302	1	1	3	0	0	-0.663555	0.0747642	2.44283	8.59431	-0.184287	17.2072	-0.663555	-6.63555	74.7642	24.4283	8.59431	0.149999	-184.287	0.300321
44.147	13.313	1	1	3	0	0	-0.661565	0.0750855	2.44482	8.59394	-0.172892	17.2068	-0.661565	-6.61565	75.0855	24.4482	8.59394	0.149992	-172.892	0.300315
44.157	13.323	1	1	3	0	0	-0.660129	0.0747105	2.44625	8.59434	-0.186114	17.2072	-0.660129	-6.60129	74.7105	24.4625	8.59434	0.15	-186.114	0.300322
44.168	13.334	1	1	3	0	0	-0.658658	0.0747111	2.44772	8.59449	-0.180069	17.2073	-0.658658	-6.58658	74.7111	24.4772	8.59449	0.150002	-180.069	0.300324
44.178	13.344	1	1	3	0	0	-0.657016	0.0749926	2.44937	8.59268	-0.184803	17.2055	-0.657016	-6.57016	74.9926	24.4937	8.59268	0.149971	-184.803	0.300293
44.189	13.355	1	1	3	0	0	-0.655294	0.0748266	2.45109	8.59436	-0.17874	17.2072	-0.655294	-6.55294	74.8266	24.5109	8.59436	0.15	-178.74	0.300322
44.2	13.366	1	1	3	0	0	-0.653521	0.0747931	2.45286	8.59456	-0.17949	17.2074	-0.653521	-6.53521	74.7931	24.5286	8.59456	0.150003	-179.49	0.300326
44.211	13.377	1	1	3	0	0	-0.651363	0.0753661	2.45502	8.59451	-0.17112	17.2073	-0.651363	-6.51363	75.3661	24.5502	8.59451	0.150002	-171.12	0.300325
44.221	13.387	1	1	3	0	0	-0.649466	0.0750005	2.45692	8.59332	-0.179861	17.2062	-0.649466	-6.49466	75.0005	24.5692	8.59332	0.149982	-179.861	0.300304
44.232	13.398	1	1	3	0	0	-0.647239	0.075296	2.45914	8.59436	-0.171276	17.2072	-0.647239	-6.47239	75.296	24.5914	8.59436	0.15	-171.276	0.300322
44.242	13.408	1	1	3	0	0	-0.645573	0.0754465	2.46081	8.59434	-0.185445	17.2072	-0.645573	-6.45573	75.4465	24.6081	8.59434	0.15	-185.445	0.300322
44.253	13.419	1	1	3	0	0	-0.643797	0.0750258	2.46258	8.59428	-0.175818	17.2071	-0.643797	-6.43797	75.0258	24.6258	8.59428	0.149998	-175.818	0.300321
44.264	13.43	1	1	3	0	0	-0.641637	0.0752202	2.46475	8.59436	-0.176412	17.2072	-0.641637	-6.41637	75.2202	24.6475	8.59436	0.15	-176.412	0.300322
44.275	13.441	1	1	3	0	0	-0.639829	0.074883	2.46655	8.59436	-0.169456	17.2072	-0.639829	-6.39829	74.883	24.6655	8.59436	0.15	-169.456	0.300322
44.285	13.451	1	1	3	0	0	-0.637537	0.0747878	2.46885	8.5935	-0.171316	17.2063	-0.637537	-6.37537	74.7878	24.6885	8.5935	0.149985	-171.316	0.300307
44.296	13.462	1	1	3	0	0	-0.635639	0.0746158	2.47074	8.59436	-0.172508	17.2072	-0.635639	-6.35639	74.6158	24.7074	8.59436	0.15	-172.508	0.300322
44.307	13.473	1	1	3	0	0	-0.63405	0.0738122	2.47233	8.5937	-0.181353	17.2065	-0.63405	-6.3405	73.8122	24.7233	8.5937	0.149988	-181.353	0.300311
44.318	13.484	1	1	3	0	0	-0.631387	0.0742064	2.475	8.59463	-0.184892	17.2075	-0.631387	-6.31387	74.2064	24.75	8.59463	0.150005	-184.892	0.300327
44.328	13.494	1	1	3	0	0	-0.629682	0.0743543	2.4767	8.5938	-0.186806	17.2066	-0.629682	-6.29682	74.3543	24.767	8.5938	0.14999	-186.806	0.300313
44.339	13.505	1	1	3	0	0	-0.627899	0.0738438	2.47848	8.59437	-0.183605	17.2072	-0.627899	-6.27899	73.8438	24.7848	8.59437	0.15	-183.605	0.300322
44.349	13.515	1	1	3	0	0	-0.626048	0.0739464	2.48033	8.59436	-0.184333	17.2072	-0.626048	-6.26048	73.9464	24.8033	8.59436	0.15	-184.333	0.300322
44.36	13.526	1	1	3	0	0	-0.623841	0.0740845	2.48254	8.59436	-0.180415	17.2072	-0.623841	-6.23841	74.0845	24.8254	8.59436	0.15	-180.415	0.300322
44.371	13.537	1	1	3	0	0	-0.622089	0.0733836	2.48429	8.59436	-0.172876	17.2072	-0.622089	-6.22089	73.3836	24.8429	8.59436	0.15	-172.876	0.300322
44.382	13.548	1	1	3	0	0	-0.620046	0.0736033	2.48634	8.59432	-0.173188	17.2072	-0.620046	-6.20046	73.6033	24.8634	8.59432	0.149999	-173.188	0.300322
44.392	13.558	1	1	3	0	0	-0.618172	0.0737511	2.48821	8.59436	-0.181304	17.2072	-0.618172	-6.18172	73.7511	24.8821	8.59436	0.15	-181.304	0.300322
44.403	13.569	1	1	3	0	0	-0.616548	0.0730737	2.48983	8.59452	-0.174102	17.2074	-0.616548	-6.16548	73.0737	24.8983	8.59452	0.150003	-174.102	0.300325
44.413	13.579	1	1	3	0	0	-0.614813	0.0733414	2.49157	8.59436	-0.18237	17.2072	-0.614813	-6.14813	73.3414	24.9157	8.59436	0.15	-182.37	0.300322
44.424	13.59	1	1	3	0	0	-0.612713	0.0735518	2.49367	8.59343	-0.173271	17.2063	-0.612713	-6.12713	73.5518	24.9367	8.59343	0.149984	-173.271	0.300306
44.435	13.601	1	1	3	0	0	-0.610618	0.0733166	2.49576	8.5944	-0.180665	17.2072	-0.610618	-6.10618	73.3166	24.9576	8.5944	0.150001	-180.665	0.300323
44.446	13.612	1	1	3	0	0	-0.6089	0.073216	2.49748	8.59329	-0.177835	17.2061	-0.6089	-6.089	73.216	24.9748	8.59329	0.149981	-177.835	0.300304
44.456	13.622	1	1	3	0	0	-0.607099	0.0734318	2.49928	8.5928	-0.176732	17.2056	-0.607099	-6.07099	73.4318	24.9928	8.5928	0.149973	-176.732	0.300295
44.467	13.633	1	1	3	0	0	-0.605396	0.0731932	2.50099	8.59432	-0.172132	17.2072	-0.605396	-6.05396	73.1932	25.0099	8.59432	0.149999	-172.132	0.300321
44.477	13.643	1	1	3	0	0	-0.603507	0.0735177	2.50288	8.59334	-0.180648	17.2062	-0.603507	-6.03507	73.5177	25.0288	8.59334	0.149982	-180.648	0.300304
44.488	13.654	1	1	3	0	0	-0.601538	0.0738025	2.50484	8.59473	-0.176596	17.2076	-0.601538	-6.01538	73.8025	25.0484	8.59473	0.150006	-176.596	0.300329
44.499	13.665	1	1	3	0	0	-0.600235	0.0730688	2.50615	8.59405	-0.189404	17.2069	-0.600235	-6.00235	73.0688	25.0615	8.59405	0.149994	-189.404	0.300317
44.51	13.676	1	1	3	0	0	-0.598232	0.0732665	2.50815	8.59387	-0.185969	17.2067	-0.598232	-5.98232	73.2665	25.0815	8.59387	0.149991	-185.969	0.300314
44.52	13.686	1	1	3	0	0	-0.597102	0.0732563	2.50928	8.59474	-0.181518	17.2076	-0.597102	-5.97102	73.2563	25.0928	8.59474	0.150006	-181.518	0.300329
44.531	13.697	1	1	3	0	0	-0.595576	0.0726698	2.51081	8.59436	-0.188599	17.2072	-0.595576	-5.95576	72.6698	25.1081	8.59436	0.15	-188.599	0.300322
44.541	13.707	1	1	3	0	0	-0.594013	0.073246	2.51237	8.59441	-0.175872	17.2073	-0.594013	-5.94013	73.246	25.1237	8.59441	0.150001	-175.872	0.300323
44.552	13.718	1	1	3	0	0	-0.592975	0.0731103	2.51341	8.59445	-0.181468	17.2073	-0.592975	-5.92975	73.1103	25.1341	8.59445	0.150001	-181.468	0.300324
44.563	13.729	1	1	3	0	0	-0.591358	0.0727821	2.51502	8.59405	-0.189687	17.2069	-0.591358	-5.91358	72.7821	25.1502	8.59405	0.149994	-189.687	0.300317
44.574	13.74	1	1	3	0	0	-0.589562	0.0729893	2.51682	8.59359	-0.186441	17.2064	-0.589562	-5.89562	72.9893	25.1682	8.59359	0.149987	-186.441	0.300309
44.584	13.75	1	1	3	0	0	-0.588318	0.073009	2.51806	8.5937	-0.184704	17.2065	-0.588318	-5.88318	73.009	25.1806	8.5937	0.149988	-184.704	0.300311
44.595	13.761	1	1	3	0	0	-0.585502	0.0733319	2.52088	8.59142	-0.182835	17.2043	-0.585502	-5.85502	73.3319	25.2088	8.59142	0.149948	-182.835	0.300271
44.605	13.771	1	1	3	0	0	-0.584485	0.0733971	2.5219	8.59309	-0.180454	17.2059	-0.584485	-5.84485	73.3971	25.219	8.59309	0.149978	-180.454	0.3003
44.616	13.782	1	1	3	0	0	-0.582559	0.0731555	2.52382	8.59328	-0.185465	17.2061	-0.582559	-5.82559	73.1555	25.2382	8.59328	0.149981	-185.465	0.300304
44.627	13.793	1	1	3	0	0	-0.581203	0.073151	2.52518	8.59274	-0.184874	17.2056	-0.581203	-5.81203	73.151	25.2518	8.59274	0.149972	-184.874	0.300294
44.638	13.804	1	1	3	0	0	-0.579418	0.0734815	2.52696	8.59434	-0.186682	17.2072	-0.579418	-5.79418	73.4815	25.2696	8.59434	0.15	-186.682	0.300322
44.648	13.814	1	1	3	0	0	-0.577894	0.0732494	2.52849	8.59353	-0.189176	17.2064	-0.577894	-5.77894	73.2494	25.2849	8.59353	0.149985	-189.176	0.300308
44.659	13.825	1	1	3	0	0	-0.576341	0.0735027	2.53004	8.5934	-0.186671	17.2062	-0.576341	-5.76341	73.5027	25.3004	8.5934	0.149983	-186.671	0.300305
44.669	13.835	1	1	3	0	0	-0.57445	0.0738841	2.53193	8.59459	-0.189923	17.2074	-0.57445	-5.7445	73.8841	25.3193	8.59459	0.150004	-189.923	0.300326
44.68	13.846	1	1	3	0	0	-0.57259	0.0735459	2.53379	8.59501	-0.197496	17.2079	-0.57259	-5.7259	73.5459	25.3379	8.59501	0.150011	-197.496	0.300334
44.691	13.857	1	1	3	0	0	-0.571116	0.0737842	2.53527	8.59417	-0.18354	17.207	-0.571116	-5.71116	73.7842	25.3527	8.59417	0.149997	-183.54	0.300319
44.702	13.868	1	1	3	0	0	-0.569306	0.0740106	2.53708	8.59437	-0.179609	17.2072	-0.569306	-5.69306	74.0106	25.3708	8.59437	0.15	-179.609	0.300322
44.712	13.878	1	1	3	0	0	-0.567509	0.0736911	2.53887	8.59349	-0.178335	17.2063	-0.567509	-5.67509	73.6911	25.3887	8.59349	0.149985	-178.335	0.300307
44.723	13.889	1	1	3	0	0	-0.566144	0.0738545	2.54024	8.59431	-0.174441	17.2071	-0.566144	-5.66144	73.8545	25.4024	8.59431	0.149999	-174.441	0.300321
44.733	13.899	1	1	3	0	0	-0.564872	0.0739716	2.54151	8.59426	-0.185282	17.2071	-0.564872	-5.64872	73.9716	25.4151	8.59426	0.149998	-185.282	0.300321
44.744	13.91	1	1	3	0	0	-0.562921	0.0738226	2.54346	8.59331	-0.183353	17.2062	-0.562921	-5.62921	73.8226	25.4346	8.59331	0.149982	-183.353	0.300304
44.755	13.921	1	1	3	0	0	-0.560847	0.0741929	2.54554	8.59344	-0.177674	17.2063	-0.560847	-5.60847	74.1929	25.4554	8.59344	0.149984	-177.674	0.300306
44.766	13.932	1	1	3	0	0	-0.55966	0.0740718	2.54672	8.59431	-0.178375	17.2071	-0.55966	-5.5966	74.0718	25.4672	8.59431	0.149999	-178.375	0.300321
44.776	13.942	1	1	3	0	0	-0.557904	0.0738207	2.54848	8.59343	-0.173524	17.2063	-0.557904	-5.57904	73.8207	25.4848	8.59343	0.149984	-173.524	0.300306
44.787	13.953	1	1	3	0	0	-0.556136	0.0743097	2.55025	8.59428	-0.174731	17.2071	-0.556136	-5.56136	74.3097	25.5025	8.59428	0.149998	-174.731	0.300321
44.797	13.963	1	1	3	0	0	-0.554364	0.0743862	2.55202	8.5926	-0.178606	17.2054	-0.554364	-5.54364	74.3862	25.5202	8.5926	0.149969	-178.606	0.300292
44.808	13.974	1	1	3	0	0	-0.552402	0.0743219	2.55398	8.59431	-0.179788	17.2072	-0.552402	-5.52402	74.3219	25.5398	8.59431	0.149999	-179.788	0.300321
44.819	13.985	1	1	3	0	0	-0.550075	0.0746545	2.55631	8.59437	-0.172523	17.2072	-0.550075	-5.50075	74.6545	25.5631	8.59437	0.15	-172.523	0.300322
44.83	13.996	1	1	3	0	0	-0.548382	0.0746397	2.558	8.59443	-0.174458	17.2073	-0.548382	-5.48382	74.6397	25.58	8.59443	0.150001	-174.458	0.300323
44.84	14.006	1	1	3	0	0	-0.547141	0.0741347	2.55924	8.59436	-0.175043	17.2072	-0.547141	-5.47141	74.1347	25.5924	8.59436	0.15	-175.043	0.300322
44.851	14.017	1	1	3	0	0	-0.54501	0.0745806	2.56137	8.59287	-0.178175	17.2057	-0.54501	-5.4501	74.5806	25.6137	8.59287	0.149974	-178.175	0.300296
44.861	14.027	1	1	3	0	0	-0.543231	0.0744994	2.56315	8.593	-0.176715	17.2058	-0.543231	-5.43231	74.4994	25.6315	8.593	0.149976	-176.715	0.300298
44.872	14.038	1	1	3	0	0	-0.541474	0.0744117	2.56491	8.59432	-0.179287	17.2072	-0.541474	-5.41474	74.4117	25.6491	8.59432	0.149999	-179.287	0.300321
44.883	14.049	1	1	3	0	0	-0.539773	0.0746618	2.56661	8.59431	-0.176828	17.2072	-0.539773	-5.39773	74.6618	25.6661	8.59431	0.149999	-176.828	0.300321
44.894	14.06	1	1	3	0	0	-0.537601	0.0742979	2.56878	8.59022	-0.180272	17.2031	-0.537601	-5.37601	74.2979	25.6878	8.59022	0.149928	-180.272	0.30025
44.904	14.07	1	1	3	0	0	-0.535831	0.0744354	2.57055	8.59379	-0.18383	17.2066	-0.535831	-5.35831	74.4354	25.7055	8.59379	0.14999	-183.83	0.300312
44.915	14.081	1	1	3	0	0	-0.533525	0.0748896	2.57286	8.59238	-0.193274	17.2052	-0.533525	-5.33525	74.8896	25.7286	8.59238	0.149965	-193.274	0.300288
44.925	14.091	1	1	3	0	0	-0.53218	0.0740922	2.5742	8.59293	-0.173215	17.2058	-0.53218	-5.3218	74.0922	25.742	8.59293	0.149975	-173.215	0.300297
44.936	14.102	1	1	3	0	0	-0.530108	0.0743542	2.57627	8.58973	-0.186084	17.2026	-0.530108	-5.30108	74.3542	25.7627	8.58973	0.149919	-186.084	0.300242
44.947	14.113	1	1	3	0	0	-0.527744	0.0745559	2.57864	8.59366	-0.18959	17.2065	-0.527744	-5.27744	74.5559	25.7864	8.59366	0.149988	-189.59	0.30031
44.958	14.124	1	1	3	0	0	-0.526097	0.0738594	2.58029	8.59433	-0.191175	17.2072	-0.526097	-5.26097	73.8594	25.8029	8.59433	0.149999	-191.175	0.300322
44.968	14.134	1	1	3	0	0	-0.524074	0.0743248	2.58231	8.59447	-0.185092	17.2073	-0.524074	-5.24074	74.3248	25.8231	8.59447	0.150002	-185.092	0.300324
44.979	14.145	1	1	3	0	0	-0.522411	0.0740828	2.58397	8.59329	-0.188005	17.2061	-0.522411	-5.22411	74.0828	25.8397	8.59329	0.149981	-188.005	0.300304
44.989	14.155	1	1	3	0	0	-0.520782	0.0736478	2.5856	8.59436	-0.182067	17.2072	-0.520782	-5.20782	73.6478	25.856	8.59436	0.15	-182.067	0.300322
45	14.166	1	1	3	0	0	-0.518627	0.0738979	2.58776	8.59252	-0.182298	17.2054	-0.518627	-5.18627	73.8979	25.8776	8.59252	0.149968	-182.298	0.30029
45.011	14.177	1	1	3	0	0	-0.516624	0.0738496	2.58976	8.5943	-0.179479	17.2071	-0.516624	-5.16624	73.8496	25.8976	8.5943	0.149999	-179.479	0.300321
45.022	14.188	1	1	3	0	0	-0.51498	0.0732471	2.5914	8.5944	-0.180248	17.2072	-0.51498	-5.1498	73.2471	25.914	8.5944	0.150001	-180.248	0.300323
45.032	14.198	1	1	3	0	0	-0.512865	0.0735278	2.59352	8.59431	-0.177953	17.2072	-0.512865	-5.12865	73.5278	25.9352	8.59431	0.149999	-177.953	0.300321
45.043	14.209	1	1	3	0	0	-0.511342	0.0735126	2.59504	8.59268	-0.182101	17.2055	-0.511342	-5.11342	73.5126	25.9504	8.59268	0.149971	-182.101	0.300293
45.053	14.219	1	1	3	0	0	-0.509426	0.0728581	2.59696	8.59436	-0.175593	17.2072	-0.509426	-5.09426	72.8581	25.9696	8.59436	0.15	-175.593	0.300322
45.064	14.23	1	1	3	0	0	-0.507658	0.0731651	2.59872	8.59299	-0.18056	17.2058	-0.507658	-5.07658	73.1651	25.9872	8.59299	0.149976	-180.56	0.300298
45.075	14.241	1	1	3	0	0	-0.505324	0.0734024	2.60106	8.59281	-0.177504	17.2056	-0.505324	-5.05324	73.4024	26.0106	8.59281	0.149973	-177.504	0.300295
45.086	14.252	1	1	3	0	0	-0.503509	0.0727776	2.60287	8.59433	-0.184876	17.2072	-0.503509	-5.03509	72.7776	26.0287	8.59433	0.149999	-184.876	0.300322
45.096	14.262	1	1	3	0	0	-0.501888	0.072714	2.60449	8.59309	-0.174361	17.2059	-0.501888	-5.01888	72.714	26.0449	8.59309	0.149978	-174.361	0.3003
45.107	14.273	1	1	3	0	0	-0.499739	0.0726184	2.60664	8.59436	-0.185165	17.2072	-0.499739	-4.99739	72.6184	26.0664	8.59436	0.15	-185.165	0.300322
45.117	14.283	1	1	3	0	0	-0.497422	0.0720602	2.60896	8.59448	-0.177937	17.2073	-0.497422	-4.97422	72.0602	26.0896	8.59448	0.150002	-177.937	0.300324
45.128	14.294	1	1	3	0	0	-0.495282	0.072247	2.6111	8.59421	-0.184399	17.207	-0.495282	-4.95282	72.247	26.111	8.59421	0.149997	-184.399	0.30032
45.139	14.305	1	1	3	0	0	-0.493406	0.0720562	2.61298	8.59484	-0.184594	17.2077	-0.493406	-4.93406	72.0562	26.1298	8.59484	0.150008	-184.594	0.300331
45.15	14.316	1	1	3	0	0	-0.491517	0.0718727	2.61487	8.5924	-0.183722	17.2052	-0.491517	-4.91517	71.8727	26.1487	8.5924	0.149966	-183.722	0.300288
45.16	14.326	1	1	3	0	0	-0.489404	0.071663	2.61698	8.59187	-0.184969	17.2047	-0.489404	-4.89404	71.663	26.1698	8.59187	0.149956	-184.969	0.300279
45.171	14.337	1	1	3	0	0	-0.487091	0.0715928	2.61929	8.59438	-0.186962	17.2072	-0.487091	-4.87091	71.5928	26.1929	8.59438	0.15	-186.962	0.300323
45.181	14.347	1	1	3	0	0	-0.485541	0.0715501	2.62084	8.59433	-0.179502	17.2072	-0.485541	-4.85541	71.5501	26.2084	8.59433	0.149999	-179.502	0.300322
45.192	14.358	1	1	3	0	0	-0.483652	0.0716955	2.62273	8.59165	-0.178002	17.2045	-0.483652	-4.83652	71.6955	26.2273	8.59165	0.149953	-178.002	0.300275
45.203	14.369	1	1	3	0	0	-0.482216	0.0710571	2.62417	8.59422	-0.177523	17.2071	-0.482216	-4.82216	71.0571	26.2417	8.59422	0.149997	-177.523	0.30032
45.214	14.38	1	1	3	0	0	-0.480439	0.0712283	2.62594	8.59434	-0.172607	17.2072	-0.480439	-4.80439	71.2283	26.2594	8.59434	0.15	-172.607	0.300322
45.224	14.39	1	1	3	0	0	-0.478886	0.0713278	2.6275	8.59428	-0.178954	17.2071	-0.478886	-4.78886	71.3278	26.275	8.59428	0.149998	-178.954	0.300321
45.235	14.401	1	1	3	0	0	-0.476774	0.0708467	2.62961	8.5931	-0.172134	17.2059	-0.476774	-4.76774	70.8467	26.2961	8.5931	0.149978	-172.134	0.3003
45.246	14.412	1	1	3	0	0	-0.475597	0.0708493	2.63078	8.59327	-0.172442	17.2061	-0.475597	-4.75597	70.8493	26.3078	8.59327	0.149981	-172.442	0.300303
45.257	14.423	1	1	3	0	0	-0.474175	0.0712458	2.63221	8.59436	-0.171862	17.2072	-0.474175	-4.74175	71.2458	26.3221	8.59436	0.15	-171.862	0.300322
45.267	14.433	1	1	3	0	0	-0.472328	0.0708994	2.63405	8.59309	-0.179071	17.2059	-0.472328	-4.72328	70.8994	26.3405	8.59309	0.149978	-179.071	0.3003
45.278	14.444	1	1	3	0	0	-0.470717	0.071005	2.63567	8.59379	-0.172006	17.2066	-0.470717	-4.70717	71.005	26.3567	8.59379	0.14999	-172.006	0.300312
45.288	14.454	1	1	3	0	0	-0.469084	0.0713404	2.6373	8.59438	-0.169489	17.2072	-0.469084	-4.69084	71.3404	26.373	8.59438	0.15	-169.489	0.300323
45.299	14.465	1	1	3	0	0	-0.467147	0.0706291	2.63924	8.59415	-0.165431	17.207	-0.467147	-4.67147	70.6291	26.3924	8.59415	0.149996	-165.431	0.300318
45.31	14.476	1	1	3	0	0	-0.465761	0.0704876	2.64062	8.59478	-0.177738	17.2076	-0.465761	-4.65761	70.4876	26.4062	8.59478	0.150007	-177.738	0.30033
45.321	14.487	1	1	3	0	0	-0.463955	0.0709445	2.64243	8.59325	-0.180161	17.2061	-0.463955	-4.63955	70.9445	26.4243	8.59325	0.14998	-180.161	0.300303
45.331	14.497	1	1	3	0	0	-0.462079	0.0707584	2.6443	8.59309	-0.165004	17.2059	-0.462079	-4.62079	70.7584	26.443	8.59309	0.149978	-165.004	0.3003
45.342	14.508	1	1	3	0	0	-0.460684	0.070645	2.6457	8.59248	-0.167545	17.2053	-0.460684	-4.60684	70.645	26.457	8.59248	0.149967	-167.545	0.300289
45.352	14.518	1	1	3	0	0	-0.458665	0.0709274	2.64772	8.59437	-0.163568	17.2072	-0.458665	-4.58665	70.9274	26.4772	8.59437	0.15	-163.568	0.300322
45.363	14.529	1	1	3	0	0	-0.457118	0.0705425	2.64926	8.58909	-0.167848	17.2019	-0.457118	-4.57118	70.5425	26.4926	8.58909	0.149908	-167.848	0.30023
45.374	14.54	1	1	3	0	0	-0.455504	0.0706201	2.65088	8.59434	-0.184367	17.2072	-0.455504	-4.55504	70.6201	26.5088	8.59434	0.15	-184.367	0.300322
45.385	14.551	1	1	3	0	0	-0.454091	0.0708321	2.65229	8.59431	-0.181959	17.2072	-0.454091	-4.54091	70.8321	26.5229	8.59431	0.149999	-181.959	0.300321
45.395	14.561	1	1	3	0	0	-0.452078	0.0704944	2.6543	8.59436	-0.171758	17.2072	-0.452078	-4.52078	70.4944	26.543	8.59436	0.15	-171.758	0.300322
45.406	14.572	1	1	3	0	0	-0.45034	0.0707624	2.65604	8.59337	-0.176415	17.2062	-0.45034	-4.5034	70.7624	26.5604	8.59337	0.149983	-176.415	0.300305
45.416	14.582	1	1	3	0	0	-0.448674	0.0707259	2.65771	8.59238	-0.17569	17.2052	-0.448674	-4.48674	70.7259	26.5771	8.59238	0.149965	-175.69	0.300288
45.427	14.593	1	1	3	0	0	-0.44708	0.0703106	2.6593	8.59416	-0.175488	17.207	-0.44708	-4.4708	70.3106	26.593	8.59416	0.149996	-175.488	0.300319
45.438	14.604	1	1	3	0	0	-0.445141	0.0705252	2.66124	8.59329	-0.18012	17.2061	-0.445141	-4.45141	70.5252	26.6124	8.59329	0.149981	-180.12	0.300304
45.449	14.615	1	1	3	0	0	-0.443235	0.070448	2.66315	8.59222	-0.174524	17.2051	-0.443235	-4.43235	70.448	26.6315	8.59222	0.149962	-174.524	0.300285
45.459	14.625	1	1	3	0	0	-0.441826	0.0702016	2.66456	8.59343	-0.184699	17.2063	-0.441826	-4.41826	70.2016	26.6456	8.59343	0.149984	-184.699	0.300306
45.47	14.636	1	1	3	0	0	-0.440032	0.0703092	2.66635	8.59436	-0.182307	17.2072	-0.440032	-4.40032	70.3092	26.6635	8.59436	0.15	-182.307	0.300322
45.48	14.646	1	1	3	0	0	-0.438659	0.0699921	2.66772	8.59469	-0.180006	17.2075	-0.438659	-4.38659	69.9921	26.6772	8.59469	0.150006	-180.006	0.300328
45.491	14.657	1	1	3	0	0	-0.436581	0.0701538	2.6698	8.59481	-0.178419	17.2076	-0.436581	-4.36581	70.1538	26.698	8.59481	0.150008	-178.419	0.30033
45.502	14.668	1	1	3	0	0	-0.435126	0.0702358	2.67126	8.59407	-0.176867	17.2069	-0.435126	-4.35126	70.2358	26.7126	8.59407	0.149995	-176.867	0.300317
45.513	14.679	1	1	3	0	0	-0.433022	0.0697558	2.67336	8.59283	-0.167902	17.2057	-0.433022	-4.33022	69.7558	26.7336	8.59283	0.149973	-167.902	0.300296
45.523	14.689	1	1	3	0	0	-0.431251	0.0698053	2.67513	8.59429	-0.172942	17.2071	-0.431251	-4.31251	69.8053	26.7513	8.59429	0.149999	-172.942	0.300321
45.534	14.7	1	1	3	0	0	-0.429091	0.0701112	2.67729	8.59412	-0.170791	17.207	-0.429091	-4.29091	70.1112	26.7729	8.59412	0.149996	-170.791	0.300318
45.544	14.71	1	1	3	0	0	-0.427694	0.0695749	2.67869	8.59298	-0.171963	17.2058	-0.427694	-4.27694	69.5749	26.7869	8.59298	0.149976	-171.963	0.300298
45.555	14.721	1	1	3	0	0	-0.42563	0.0699911	2.68075	8.59282	-0.177746	17.2057	-0.42563	-4.2563	69.9911	26.8075	8.59282	0.149973	-177.746	0.300295
45.566	14.732	1	1	3	0	0	-0.423524	0.0701534	2.68286	8.59288	-0.18341	17.2057	-0.423524	-4.23524	70.1534	26.8286	8.59288	0.149974	-183.41	0.300296
45.577	14.743	1	1	3	0	0	-0.421941	0.0695698	2.68444	8.59343	-0.18021	17.2063	-0.421941	-4.21941	69.5698	26.8444	8.59343	0.149984	-180.21	0.300306
45.587	14.753	1	1	3	0	0	-0.420045	0.0697863	2.68634	8.59434	-0.179571	17.2072	-0.420045	-4.20045	69.7863	26.8634	8.59434	0.15	-179.571	0.300322
45.598	14.764	1	1	3	0	0	-0.418226	0.0698521	2.68816	8.59293	-0.18205	17.2058	-0.418226	-4.18226	69.8521	26.8816	8.59293	0.149975	-182.05	0.300297
45.608	14.774	1	1	3	0	0	-0.416627	0.0692188	2.68976	8.59399	-0.179183	17.2068	-0.416627	-4.16627	69.2188	26.8976	8.59399	0.149993	-179.183	0.300316
45.619	14.785	1	1	3	0	0	-0.414913	0.0691395	2.69147	8.59454	-0.179366	17.2074	-0.414913	-4.14913	69.1395	26.9147	8.59454	0.150003	-179.366	0.300325
45.63	14.796	1	1	3	0	0	-0.413065	0.0692844	2.69332	8.59279	-0.177761	17.2056	-0.413065	-4.13065	69.2844	26.9332	8.59279	0.149973	-177.761	0.300295
45.641	14.807	1	1	3	0	0	-0.410396	0.0692965	2.69599	8.59373	-0.176447	17.2066	-0.410396	-4.10396	69.2965	26.9599	8.59373	0.149989	-176.447	0.300311
45.651	14.817	1	1	3	0	0	-0.408592	0.0691873	2.69779	8.59255	-0.17618	17.2054	-0.408592	-4.08592	69.1873	26.9779	8.59255	0.149968	-176.18	0.300291
45.662	14.828	1	1	3	0	0	-0.407513	0.0688299	2.69887	8.59387	-0.175964	17.2067	-0.407513	-4.07513	68.8299	26.9887	8.59387	0.149991	-175.964	0.300314
45.672	14.838	1	1	3	0	0	-0.405623	0.0686083	2.70076	8.59448	-0.171443	17.2073	-0.405623	-4.05623	68.6083	27.0076	8.59448	0.150002	-171.443	0.300324
45.683	14.849	1	1	3	0	0	-0.403651	0.0687868	2.70273	8.59304	-0.168725	17.2059	-0.403651	-4.03651	68.7868	27.0273	8.59304	0.149977	-168.725	0.300299
45.694	14.86	1	1	3	0	0	-0.401731	0.0689944	2.70465	8.59364	-0.169769	17.2065	-0.401731	-4.01731	68.9944	27.0465	8.59364	0.149987	-169.769	0.30031
45.705	14.871	1	1	3	0	0	-0.400271	0.068409	2.70611	8.59433	-0.175772	17.2072	-0.400271	-4.00271	68.409	27.0611	8.59433	0.149999	-175.772	0.300322
45.715	14.881	1	1	3	0	0	-0.398202	0.0686305	2.70818	8.59316	-0.167246	17.206	-0.398202	-3.98202	68.6305	27.0818	8.59316	0.149979	-167.246	0.300301
45.726	14.892	1	1	3	0	0	-0.396444	0.0686776	2.70994	8.5925	-0.168833	17.2053	-0.396444	-3.96444	68.6776	27.0994	8.5925	0.149967	-168.833	0.30029
45.736	14.902	1	1	3	0	0	-0.394797	0.0683333	2.71159	8.59119	-0.176289	17.204	-0.394797	-3.94797	68.3333	27.1159	8.59119	0.149944	-176.289	0.300267
45.747	14.913	1	1	3	0	0	-0.392737	0.0686968	2.71365	8.59151	-0.173165	17.2043	-0.392737	-3.92737	68.6968	27.1365	8.59151	0.14995	-173.165	0.300272
45.758	14.924	1	1	3	0	0	-0.390888	0.068124	2.71549	8.59435	-0.168524	17.2072	-0.390888	-3.90888	68.124	27.1549	8.59435	0.15	-168.524	0.300322
45.769	14.935	1	1	3	0	0	-0.388705	0.068354	2.71768	8.59379	-0.171465	17.2066	-0.388705	-3.88705	68.354	27.1768	8.59379	0.14999	-171.465	0.300312
45.779	14.945	1	1	3	0	0	-0.386863	0.0684291	2.71952	8.59217	-0.184195	17.205	-0.386863	-3.86863	68.4291	27.1952	8.59217	0.149962	-184.195	0.300284
45.79	14.956	1	1	3	0	0	-0.385031	0.068168	2.72135	8.59435	-0.181035	17.2072	-0.385031	-3.85031	68.168	27.2135	8.59435	0.15	-181.035	0.300322
45.8	14.966	1	1	3	0	0	-0.3835	0.0682403	2.72288	8.59371	-0.175586	17.2065	-0.3835	-3.835	68.2403	27.2288	8.59371	0.149988	-175.586	0.300311
45.811	14.977	1	1	3	0	0	-0.381683	0.0681633	2.7247	8.59282	-0.172936	17.2057	-0.381683	-3.81683	68.1633	27.247	8.59282	0.149973	-172.936	0.300295
45.822	14.988	1	1	3	0	0	-0.380111	0.0678593	2.72627	8.59176	-0.174818	17.2046	-0.380111	-3.80111	67.8593	27.2627	8.59176	0.149954	-174.818	0.300277
45.833	14.999	1	1	3	0	0	-0.378297	0.0681191	2.72809	8.59336	-0.172947	17.2062	-0.378297	-3.78297	68.1191	27.2809	8.59336	0.149982	-172.947	0.300305
45.843	15.009	1	1	3	0	0	-0.377021	0.0680085	2.72936	8.59349	-0.168032	17.2063	-0.377021	-3.77021	68.0085	27.2936	8.59349	0.149985	-168.032	0.300307
45.854	15.02	1	1	3	0	0	-0.374858	0.0677147	2.73152	8.59302	-0.165877	17.2059	-0.374858	-3.74858	67.7147	27.3152	8.59302	0.149976	-165.877	0.300299
45.864	15.03	1	1	3	0	0	-0.373404	0.0679079	2.73298	8.59206	-0.178671	17.2049	-0.373404	-3.73404	67.9079	27.3298	8.59206	0.14996	-178.671	0.300282
45.875	15.041	1	1	3	0	0	-0.371385	0.0682376	2.735	8.59301	-0.179541	17.2059	-0.371385	-3.71385	68.2376	27.35	8.59301	0.149976	-179.541	0.300299
45.886	15.052	1	1	3	0	0	-0.369897	0.0678921	2.73649	8.59341	-0.175952	17.2063	-0.369897	-3.69897	67.8921	27.3649	8.59341	0.149983	-175.952	0.300306
45.897	15.063	1	1	3	0	0	-0.368374	0.0680327	2.73801	8.59393	-0.176945	17.2068	-0.368374	-3.68374	68.0327	27.3801	8.59393	0.149992	-176.945	0.300315
45.907	15.073	1	1	3	0	0	-0.366994	0.0682587	2.73939	8.59208	-0.170439	17.2049	-0.366994	-3.66994	68.2587	27.3939	8.59208	0.14996	-170.439	0.300283
45.918	15.084	1	1	3	0	0	-0.36557	0.0678979	2.74081	8.59213	-0.175305	17.205	-0.36557	-3.6557	67.8979	27.4081	8.59213	0.149961	-175.305	0.300283
45.928	15.094	1	1	3	0	0	-0.363966	0.0678312	2.74242	8.59436	-0.173489	17.2072	-0.363966	-3.63966	67.8312	27.4242	8.59436	0.15	-173.489	0.300322
45.939	15.105	1	1	3	0	0	-0.362352	0.0682933	2.74403	8.59354	-0.175916	17.2064	-0.362352	-3.62352	68.2933	27.4403	8.59354	0.149986	-175.916	0.300308
45.95	15.116	1	1	3	0	0	-0.360639	0.06827	2.74574	8.59437	-0.166514	17.2072	-0.360639	-3.60639	68.27	27.4574	8.59437	0.15	-166.514	0.300322
45.961	15.127	1	1	3	0	0	-0.35922	0.0683577	2.74716	8.59274	-0.167437	17.2056	-0.35922	-3.5922	68.3577	27.4716	8.59274	0.149972	-167.437	0.300294
45.971	15.137	1	1	3	0	0	-0.357424	0.0688226	2.74896	8.59352	-0.176378	17.2064	-0.357424	-3.57424	68.8226	27.4896	8.59352	0.149985	-176.378	0.300308
45.982	15.148	1	1	3	0	0	-0.355876	0.0683087	2.75051	8.59433	-0.172894	17.2072	-0.355876	-3.55876	68.3087	27.5051	8.59433	0.149999	-172.894	0.300322
45.992	15.158	1	1	3	0	0	-0.354378	0.0685252	2.752	8.58943	-0.176584	17.2023	-0.354378	-3.54378	68.5252	27.52	8.58943	0.149914	-176.584	0.300236
46.003	15.169	1	1	3	0	0	-0.352748	0.0689523	2.75363	8.59186	-0.181494	17.2047	-0.352748	-3.52748	68.9523	27.5363	8.59186	0.149956	-181.494	0.300279
46.014	15.18	1	1	3	0	0	-0.35102	0.0689081	2.75536	8.59429	-0.179149	17.2071	-0.35102	-3.5102	68.9081	27.5536	8.59429	0.149999	-179.149	0.300321
46.025	15.191	1	1	3	0	0	-0.348945	0.0693453	2.75744	8.59186	-0.180462	17.2047	-0.348945	-3.48945	69.3453	27.5744	8.59186	0.149956	-180.462	0.300279
46.035	15.201	1	1	3	0	0	-0.347331	0.0691278	2.75905	8.59315	-0.171778	17.206	-0.347331	-3.47331	69.1278	27.5905	8.59315	0.149979	-171.778	0.300301
46.046	15.212	1	1	3	0	0	-0.345948	0.0690154	2.76043	8.59372	-0.170948	17.2066	-0.345948	-3.45948	69.0154	27.6043	8.59372	0.149989	-170.948	0.300311
46.056	15.222	1	1	3	0	0	-0.344589	0.0690774	2.76179	8.59436	-0.17719	17.2072	-0.344589	-3.44589	69.0774	27.6179	8.59436	0.15	-177.19	0.300322
46.067	15.233	1	1	3	0	0	-0.342655	0.0691881	2.76373	8.59428	-0.17395	17.2071	-0.342655	-3.42655	69.1881	27.6373	8.59428	0.149998	-173.95	0.300321
46.078	15.244	1	1	3	0	0	-0.340875	0.069302	2.76551	8.59181	-0.175664	17.2047	-0.340875	-3.40875	69.302	27.6551	8.59181	0.149955	-175.664	0.300278
46.089	15.255	1	1	3	0	0	-0.339491	0.06955	2.76689	8.59443	-0.182424	17.2073	-0.339491	-3.39491	69.55	27.6689	8.59443	0.150001	-182.424	0.300323
46.099	15.265	1	1	3	0	0	-0.337723	0.0693802	2.76866	8.59465	-0.181068	17.2075	-0.337723	-3.37723	69.3802	27.6866	8.59465	0.150005	-181.068	0.300327
46.11	15.276	1	1	3	0	0	-0.335667	0.0699769	2.77072	8.59434	-0.17662	17.2072	-0.335667	-3.35667	69.9769	27.7072	8.59434	0.15	-176.62	0.300322
46.121	15.287	1	1	3	0	0	-0.333836	0.0701842	2.77255	8.59248	-0.177235	17.2053	-0.333836	-3.33836	70.1842	27.7255	8.59248	0.149967	-177.235	0.300289
46.132	15.298	1	1	3	0	0	-0.33211	0.0699068	2.77427	8.59189	-0.180763	17.2047	-0.33211	-3.3211	69.9068	27.7427	8.59189	0.149957	-180.763	0.300279
46.142	15.308	1	1	3	0	0	-0.330425	0.0699159	2.77596	8.59395	-0.191078	17.2068	-0.330425	-3.30425	69.9159	27.7596	8.59395	0.149993	-191.078	0.300315
46.153	15.319	1	1	3	0	0	-0.328535	0.0703511	2.77785	8.59261	-0.187813	17.2054	-0.328535	-3.28535	70.3511	27.7785	8.59261	0.149969	-187.813	0.300292
46.163	15.329	1	1	3	0	0	-0.326742	0.0702081	2.77964	8.59293	-0.179236	17.2058	-0.326742	-3.26742	70.2081	27.7964	8.59293	0.149975	-179.236	0.300297
46.174	15.34	1	1	3	0	0	-0.324845	0.070356	2.78154	8.59357	-0.186771	17.2064	-0.324845	-3.24845	70.356	27.8154	8.59357	0.149986	-186.771	0.300308
46.185	15.351	1	1	3	0	0	-0.322765	0.0707331	2.78362	8.59408	-0.181946	17.2069	-0.322765	-3.22765	70.7331	27.8362	8.59408	0.149995	-181.946	0.300317
46.196	15.362	1	1	3	0	0	-0.321464	0.0701653	2.78492	8.59351	-0.176223	17.2063	-0.321464	-3.21464	70.1653	27.8492	8.59351	0.149985	-176.223	0.300307
46.206	15.372	1	1	3	0	0	-0.319866	0.0703673	2.78652	8.59362	-0.184249	17.2065	-0.319866	-3.19866	70.3673	27.8652	8.59362	0.149987	-184.249	0.300309
46.217	15.383	1	1	3	0	0	-0.317481	0.0707209	2.7889	8.59241	-0.177776	17.2052	-0.317481	-3.17481	70.7209	27.889	8.59241	0.149966	-177.776	0.300288
46.227	15.393	1	1	3	0	0	-0.316076	0.070357	2.79031	8.593	-0.188349	17.2058	-0.316076	-3.16076	70.357	27.9031	8.593	0.149976	-188.349	0.300298
46.238	15.404	1	1	3	0	0	-0.313739	0.0707836	2.79264	8.59416	-0.179031	17.207	-0.313739	-3.13739	70.7836	27.9264	8.59416	0.149996	-179.031	0.300319
46.249	15.415	1	1	3	0	0	-0.312009	0.0709223	2.79437	8.59406	-0.178869	17.2069	-0.312009	-3.12009	70.9223	27.9437	8.59406	0.149995	-178.869	0.300317
46.26	15.426	1	1	3	0	0	-0.310625	0.0703224	2.79576	8.59446	-0.173487	17.2073	-0.310625	-3.10625	70.3224	27.9576	8.59446	0.150002	-173.487	0.300324
46.27	15.436	1	1	3	0	0	-0.30895	0.070842	2.79743	8.59406	-0.184193	17.2069	-0.30895	-3.0895	70.842	27.9743	8.59406	0.149995	-184.193	0.300317
46.281	15.447	1	1	3	0	0	-0.306776	0.0709769	2.79961	8.59375	-0.169411	17.2066	-0.306776	-3.06776	70.9769	27.9961	8.59375	0.149989	-169.411	0.300312
46.291	15.457	1	1	3	0	0	-0.305173	0.0705128	2.80121	8.59466	-0.182343	17.2075	-0.305173	-3.05173	70.5128	28.0121	8.59466	0.150005	-182.343	0.300327
46.302	15.468	1	1	3	0	0	-0.303527	0.0708876	2.80286	8.59452	-0.173898	17.2074	-0.303527	-3.03527	70.8876	28.0286	8.59452	0.150003	-173.898	0.300325
46.313	15.479	1	1	3	0	0	-0.30109	0.0711303	2.80529	8.59285	-0.173881	17.2057	-0.30109	-3.0109	71.1303	28.0529	8.59285	0.149974	-173.881	0.300296
46.324	15.49	1	1	3	0	0	-0.299603	0.0709188	2.80678	8.5944	-0.172649	17.2072	-0.299603	-2.99603	70.9188	28.0678	8.5944	0.150001	-172.649	0.300323
46.334	15.5	1	1	3	0	0	-0.297826	0.0712039	2.80856	8.5937	-0.181935	17.2065	-0.297826	-2.97826	71.2039	28.0856	8.5937	0.149988	-181.935	0.300311
46.345	15.511	1	1	3	0	0	-0.295709	0.0708722	2.81067	8.59196	-0.172917	17.2048	-0.295709	-2.95709	70.8722	28.1067	8.59196	0.149958	-172.917	0.30028
46.355	15.521	1	1	3	0	0	-0.29398	0.0713069	2.8124	8.59188	-0.177032	17.2047	-0.29398	-2.9398	71.3069	28.124	8.59188	0.149957	-177.032	0.300279
46.366	15.532	1	1	3	0	0	-0.292528	0.0712984	2.81385	8.59081	-0.17999	17.2036	-0.292528	-2.92528	71.2984	28.1385	8.59081	0.149938	-179.99	0.30026
46.377	15.543	1	1	3	0	0	-0.291162	0.0706667	2.81522	8.59225	-0.185143	17.2051	-0.291162	-2.91162	70.6667	28.1522	8.59225	0.149963	-185.143	0.300286
46.388	15.554	1	1	3	0	0	-0.289183	0.0711851	2.8172	8.59445	-0.183836	17.2073	-0.289183	-2.89183	71.1851	28.172	8.59445	0.150001	-183.836	0.300324
46.398	15.564	1	1	3	0	0	-0.287145	0.071544	2.81924	8.59185	-0.181143	17.2047	-0.287145	-2.87145	71.544	28.1924	8.59185	0.149956	-181.143	0.300278
46.409	15.575	1	1	3	0	0	-0.285489	0.071187	2.82089	8.59348	-0.175029	17.2063	-0.285489	-2.85489	71.187	28.2089	8.59348	0.149984	-175.029	0.300307
46.419	15.585	1	1	3	0	0	-0.283743	0.0712678	2.82264	8.59466	-0.186458	17.2075	-0.283743	-2.83743	71.2678	28.2264	8.59466	0.150005	-186.458	0.300327
46.43	15.596	1	1	3	0	0	-0.281906	0.0714904	2.82448	8.59301	-0.182852	17.2058	-0.281906	-2.81906	71.4904	28.2448	8.59301	0.149976	-182.852	0.300299
46.441	15.607	1	1	3	0	0	-0.279835	0.0712875	2.82655	8.59152	-0.172055	17.2044	-0.279835	-2.79835	71.2875	28.2655	8.59152	0.14995	-172.055	0.300273
46.452	15.618	1	1	3	0	0	-0.278137	0.0715576	2.82825	8.59358	-0.156808	17.2064	-0.278137	-2.78137	71.5576	28.2825	8.59358	0.149986	-156.808	0.300309
46.462	15.628	1	1	3	0	0	-0.276233	0.0718347	2.83015	8.59123	-0.173501	17.2041	-0.276233	-2.76233	71.8347	28.3015	8.59123	0.149945	-173.501	0.300268
46.473	15.639	1	1	3	0	0	-0.274561	0.0714998	2.83182	8.59359	-0.16679	17.2064	-0.274561	-2.74561	71.4998	28.3182	8.59359	0.149986	-166.79	0.300309
46.483	15.649	1	1	3	0	0	-0.273098	0.0716468	2.83328	8.59397	-0.188961	17.2068	-0.273098	-2.73098	71.6468	28.3328	8.59397	0.149993	-188.961	0.300316
46.494	15.66	1	1	3	0	0	-0.271138	0.0717857	2.83524	8.59168	-0.171512	17.2045	-0.271138	-2.71138	71.7857	28.3524	8.59168	0.149953	-171.512	0.300275
46.505	15.671	1	1	3	0	0	-0.269343	0.0713264	2.83704	8.5906	-0.161592	17.2034	-0.269343	-2.69343	71.3264	28.3704	8.5906	0.149934	-161.592	0.300257
46.516	15.682	1	1	3	0	0	-0.267545	0.0716598	2.83884	8.59375	-0.163108	17.2066	-0.267545	-2.67545	71.6598	28.3884	8.59375	0.149989	-163.108	0.300312
46.526	15.692	1	1	3	0	0	-0.266099	0.0716629	2.84028	8.5933	-0.178114	17.2061	-0.266099	-2.66099	71.6629	28.4028	8.5933	0.149981	-178.114	0.300304
46.537	15.703	1	1	3	0	0	-0.264026	0.0717373	2.84236	8.59434	-0.177107	17.2072	-0.264026	-2.64026	71.7373	28.4236	8.59434	0.15	-177.107	0.300322
46.547	15.713	1	1	3	0	0	-0.262627	0.0717201	2.84376	8.59328	-0.175454	17.2061	-0.262627	-2.62627	71.7201	28.4376	8.59328	0.149981	-175.454	0.300304
46.558	15.724	1	1	3	0	0	-0.26124	0.0719775	2.84514	8.59175	-0.170136	17.2046	-0.26124	-2.6124	71.9775	28.4514	8.59175	0.149954	-170.136	0.300277
46.569	15.735	1	1	3	0	0	-0.258906	0.0720298	2.84748	8.59279	-0.176967	17.2056	-0.258906	-2.58906	72.0298	28.4748	8.59279	0.149973	-176.967	0.300295
46.58	15.746	1	1	3	0	0	-0.257474	0.0718141	2.84891	8.59075	-0.176717	17.2036	-0.257474	-2.57474	71.8141	28.4891	8.59075	0.149937	-176.717	0.300259
46.59	15.756	1	1	3	0	0	-0.255688	0.0720079	2.85069	8.59368	-0.181715	17.2065	-0.255688	-2.55688	72.0079	28.5069	8.59368	0.149988	-181.715	0.30031
46.601	15.767	1	1	3	0	0	-0.25386	0.0719416	2.85252	8.59387	-0.18092	17.2067	-0.25386	-2.5386	71.9416	28.5252	8.59387	0.149991	-180.92	0.300314
46.611	15.777	1	1	3	0	0	-0.251891	0.0723324	2.85449	8.59451	-0.180614	17.2073	-0.251891	-2.51891	72.3324	28.5449	8.59451	0.150002	-180.614	0.300325
46.622	15.788	1	1	3	0	0	-0.250053	0.0720039	2.85633	8.59235	-0.180147	17.2052	-0.250053	-2.50053	72.0039	28.5633	8.59235	0.149965	-180.147	0.300287
46.633	15.799	1	1	3	0	0	-0.248217	0.0721345	2.85817	8.59261	-0.188326	17.2054	-0.248217	-2.48217	72.1345	28.5817	8.59261	0.149969	-188.326	0.300292
46.644	15.81	1	1	3	0	0	-0.246627	0.0722537	2.85976	8.59207	-0.184309	17.2049	-0.246627	-2.46627	72.2537	28.5976	8.59207	0.14996	-184.309	0.300282
46.654	15.82	1	1	3	0	0	-0.244514	0.0720922	2.86187	8.59333	-0.17049	17.2062	-0.244514	-2.44514	72.0922	28.6187	8.59333	0.149982	-170.49	0.300304
46.665	15.831	1	1	3	0	0	-0.242722	0.0721954	2.86366	8.59388	-0.176988	17.2067	-0.242722	-2.42722	72.1954	28.6366	8.59388	0.149991	-176.988	0.300314
46.675	15.841	1	1	3	0	0	-0.240765	0.0725179	2.86562	8.59293	-0.175647	17.2058	-0.240765	-2.40765	72.5179	28.6562	8.59293	0.149975	-175.647	0.300297
46.686	15.852	1	1	3	0	0	-0.23907	0.0719755	2.86731	8.59429	-0.184259	17.2071	-0.23907	-2.3907	71.9755	28.6731	8.59429	0.149999	-184.259	0.300321
46.697	15.863	1	1	3	0	0	-0.237071	0.0722164	2.86931	8.59386	-0.178647	17.2067	-0.237071	-2.37071	72.2164	28.6931	8.59386	0.149991	-178.647	0.300314
46.708	15.874	1	1	3	0	0	-0.235219	0.0720622	2.87116	8.59248	-0.178213	17.2053	-0.235219	-2.35219	72.0622	28.7116	8.59248	0.149967	-178.213	0.300289
46.718	15.884	1	1	3	0	0	-0.23344	0.071886	2.87294	8.59252	-0.173003	17.2054	-0.23344	-2.3344	71.886	28.7294	8.59252	0.149968	-173.003	0.30029
46.729	15.895	1	1	3	0	0	-0.231702	0.072074	2.87468	8.59264	-0.184427	17.2055	-0.231702	-2.31702	72.074	28.7468	8.59264	0.14997	-184.427	0.300292
46.739	15.905	1	1	3	0	0	-0.230132	0.0722081	2.87625	8.59308	-0.172075	17.2059	-0.230132	-2.30132	72.2081	28.7625	8.59308	0.149978	-172.075	0.3003
46.75	15.916	1	1	3	0	0	-0.228213	0.0717024	2.87817	8.59285	-0.17969	17.2057	-0.228213	-2.28213	71.7024	28.7817	8.59285	0.149974	-179.69	0.300296
46.761	15.927	1	1	3	0	0	-0.226423	0.0718386	2.87996	8.5945	-0.179193	17.2073	-0.226423	-2.26423	71.8386	28.7996	8.5945	0.150002	-179.193	0.300325
46.772	15.938	1	1	3	0	0	-0.224252	0.0719996	2.88213	8.59259	-0.183328	17.2054	-0.224252	-2.24252	71.9996	28.8213	8.59259	0.149969	-183.328	0.300291
46.782	15.948	1	1	3	0	0	-0.222643	0.0715061	2.88374	8.59227	-0.185224	17.2051	-0.222643	-2.22643	71.5061	28.8374	8.59227	0.149963	-185.224	0.300286
46.793	15.959	1	1	3	0	0	-0.220696	0.071342	2.88569	8.59332	-0.194675	17.2062	-0.220696	-2.20696	71.342	28.8569	8.59332	0.149982	-194.675	0.300304
46.803	15.969	1	1	3	0	0	-0.218888	0.0715097	2.88749	8.59161	-0.166925	17.2045	-0.218888	-2.18888	71.5097	28.8749	8.59161	0.149952	-166.925	0.300274
46.814	15.98	1	1	3	0	0	-0.216394	0.0714451	2.88999	8.59446	-0.183178	17.2073	-0.216394	-2.16394	71.4451	28.8999	8.59446	0.150002	-183.178	0.300324
46.825	15.991	1	1	3	0	0	-0.214868	0.0712268	2.89151	8.5908	-0.180454	17.2036	-0.214868	-2.14868	71.2268	28.9151	8.5908	0.149938	-180.454	0.30026
46.836	16.002	1	1	3	0	0	-0.211975	0.0717172	2.89441	8.59434	-0.187033	17.2072	-0.211975	-2.11975	71.7172	28.9441	8.59434	0.15	-187.033	0.300322
46.846	16.012	1	1	3	0	0	-0.210036	0.07101	2.89635	8.59441	-0.186963	17.2073	-0.210036	-2.10036	71.01	28.9635	8.59441	0.150001	-186.963	0.300323
46.857	16.023	1	1	3	0	0	-0.208314	0.0709275	2.89807	8.59362	-0.184829	17.2065	-0.208314	-2.08314	70.9275	28.9807	8.59362	0.149987	-184.829	0.300309
46.867	16.033	1	1	3	0	0	-0.207061	0.0708102	2.89932	8.59328	-0.186962	17.2061	-0.207061	-2.07061	70.8102	28.9932	8.59328	0.149981	-186.962	0.300303
46.878	16.044	1	1	3	0	0	-0.204593	0.0708343	2.90179	8.59307	-0.19464	17.2059	-0.204593	-2.04593	70.8343	29.0179	8.59307	0.149977	-194.64	0.3003
46.889	16.055	1	1	3	0	0	-0.202644	0.0707399	2.90374	8.59282	-0.191098	17.2057	-0.202644	-2.02644	70.7399	29.0374	8.59282	0.149973	-191.098	0.300295
46.9	16.066	1	1	3	0	0	-0.200973	0.069871	2.90541	8.59186	-0.183229	17.2047	-0.200973	-2.00973	69.871	29.0541	8.59186	0.149956	-183.229	0.300279
46.91	16.076	1	1	3	0	0	-0.199437	0.0699346	2.90695	8.59211	-0.178832	17.205	-0.199437	-1.99437	69.9346	29.0695	8.59211	0.149961	-178.832	0.300283
46.921	16.087	1	1	3	0	0	-0.197381	0.0699308	2.909	8.59399	-0.177393	17.2068	-0.197381	-1.97381	69.9308	29.09	8.59399	0.149993	-177.393	0.300316
46.931	16.097	1	1	3	0	0	-0.195799	0.0695321	2.91058	8.59453	-0.182689	17.2074	-0.195799	-1.95799	69.5321	29.1058	8.59453	0.150003	-182.689	0.300325
46.942	16.108	1	1	3	0	0	-0.193482	0.0697821	2.9129	8.5935	-0.177552	17.2063	-0.193482	-1.93482	69.7821	29.129	8.5935	0.149985	-177.552	0.300307
46.953	16.119	1	1	3	0	0	-0.191056	0.0698656	2.91533	8.59425	-0.167195	17.2071	-0.191056	-1.91056	69.8656	29.1533	8.59425	0.149998	-167.195	0.30032
46.964	16.13	1	1	3	0	0	-0.18966	0.069212	2.91672	8.59431	-0.166798	17.2072	-0.18966	-1.8966	69.212	29.1672	8.59431	0.149999	-166.798	0.300321
46.974	16.14	1	1	3	0	0	-0.188286	0.0691624	2.9181	8.58991	-0.166297	17.2028	-0.188286	-1.88286	69.1624	29.181	8.58991	0.149922	-166.297	0.300245
46.985	16.151	1	1	3	0	0	-0.186422	0.0694656	2.91996	8.5924	-0.173273	17.2052	-0.186422	-1.86422	69.4656	29.1996	8.5924	0.149966	-173.273	0.300288
46.996	16.162	1	1	3	0	0	-0.184482	0.0690769	2.9219	8.59188	-0.165264	17.2047	-0.184482	-1.84482	69.0769	29.219	8.59188	0.149957	-165.264	0.300279
47.007	16.173	1	1	3	0	0	-0.183029	0.0692513	2.92335	8.59434	-0.166576	17.2072	-0.183029	-1.83029	69.2513	29.2335	8.59434	0.15	-166.576	0.300322
47.017	16.183	1	1	3	0	0	-0.181054	0.0696991	2.92533	8.59259	-0.169442	17.2054	-0.181054	-1.81054	69.6991	29.2533	8.59259	0.149969	-169.442	0.300291
47.028	16.194	1	1	3	0	0	-0.178967	0.0693014	2.92742	8.59341	-0.172639	17.2062	-0.178967	-1.78967	69.3014	29.2742	8.59341	0.149983	-172.639	0.300306
47.038	16.204	1	1	3	0	0	-0.177695	0.0695688	2.92869	8.59335	-0.170662	17.2062	-0.177695	-1.77695	69.5688	29.2869	8.59335	0.149982	-170.662	0.300305
47.049	16.215	1	1	3	0	0	-0.17594	0.0694475	2.93044	8.59428	-0.171741	17.2071	-0.17594	-1.7594	69.4475	29.3044	8.59428	0.149998	-171.741	0.300321
47.06	16.226	1	1	3	0	0	-0.173919	0.0694162	2.93246	8.59452	-0.169445	17.2074	-0.173919	-1.73919	69.4162	29.3246	8.59452	0.150003	-169.445	0.300325
47.071	16.237	1	1	3	0	0	-0.17215	0.0692062	2.93423	8.58968	-0.169212	17.2025	-0.17215	-1.7215	69.2062	29.3423	8.58968	0.149918	-169.212	0.300241
47.081	16.247	1	1	3	0	0	-0.170686	0.0692213	2.9357	8.5941	-0.165967	17.2069	-0.170686	-1.70686	69.2213	29.357	8.5941	0.149995	-165.967	0.300318
47.092	16.258	1	1	3	0	0	-0.168794	0.0691796	2.93759	8.59336	-0.172186	17.2062	-0.168794	-1.68794	69.1796	29.3759	8.59336	0.149982	-172.186	0.300305
47.102	16.268	1	1	3	0	0	-0.167507	0.0691875	2.93888	8.59444	-0.174368	17.2073	-0.167507	-1.67507	69.1875	29.3888	8.59444	0.150001	-174.368	0.300324
47.113	16.279	1	1	3	0	0	-0.165806	0.0693458	2.94058	8.59217	-0.178831	17.205	-0.165806	-1.65806	69.3458	29.4058	8.59217	0.149962	-178.831	0.300284
47.124	16.29	1	1	3	0	0	-0.164343	0.0690957	2.94204	8.59294	-0.183143	17.2058	-0.164343	-1.64343	69.0957	29.4204	8.59294	0.149975	-183.143	0.300298
47.135	16.301	1	1	3	0	0	-0.162024	0.0695792	2.94436	8.59306	-0.177801	17.2059	-0.162024	-1.62024	69.5792	29.4436	8.59306	0.149977	-177.801	0.3003
47.145	16.311	1	1	3	0	0	-0.160518	0.0693671	2.94586	8.59465	-0.176312	17.2075	-0.160518	-1.60518	69.3671	29.4586	8.59465	0.150005	-176.312	0.300327
47.156	16.322	1	1	3	0	0	-0.159067	0.0691936	2.94732	8.59463	-0.179941	17.2075	-0.159067	-1.59067	69.1936	29.4732	8.59463	0.150005	-179.941	0.300327
47.166	16.332	1	1	3	0	0	-0.15786	0.0690399	2.94852	8.59314	-0.175903	17.206	-0.15786	-1.5786	69.0399	29.4852	8.59314	0.149979	-175.903	0.300301
47.177	16.343	1	1	3	0	0	-0.156042	0.0692191	2.95034	8.59353	-0.168435	17.2064	-0.156042	-1.56042	69.2191	29.5034	8.59353	0.149985	-168.435	0.300308
47.188	16.354	1	1	3	0	0	-0.15413	0.0690593	2.95225	8.59423	-0.172559	17.2071	-0.15413	-1.5413	69.0593	29.5225	8.59423	0.149998	-172.559	0.30032
47.199	16.365	1	1	3	0	0	-0.152145	0.0691979	2.95424	8.59181	-0.179089	17.2046	-0.152145	-1.52145	69.1979	29.5424	8.59181	0.149955	-179.089	0.300278
47.209	16.375	1	1	3	0	0	-0.150828	0.069017	2.95555	8.59195	-0.185399	17.2048	-0.150828	-1.50828	69.017	29.5555	8.59195	0.149958	-185.399	0.30028
47.22	16.386	1	1	3	0	0	-0.14899	0.0692276	2.95739	8.59043	-0.18795	17.2033	-0.14899	-1.4899	69.2276	29.5739	8.59043	0.149931	-187.95	0.300254
47.23	16.396	1	1	3	0	0	-0.147332	0.0694576	2.95905	8.59227	-0.170299	17.2051	-0.147332	-1.47332	69.4576	29.5905	8.59227	0.149963	-170.299	0.300286
47.241	16.407	1	1	3	0	0	-0.145409	0.0691121	2.96097	8.59124	-0.175668	17.2041	-0.145409	-1.45409	69.1121	29.6097	8.59124	0.149945	-175.668	0.300268
47.252	16.418	1	1	3	0	0	-0.143625	0.0694477	2.96276	8.59408	-0.186636	17.2069	-0.143625	-1.43625	69.4477	29.6276	8.59408	0.149995	-186.636	0.300317
47.263	16.429	1	1	3	0	0	-0.141828	0.0696206	2.96455	8.59108	-0.185686	17.2039	-0.141828	-1.41828	69.6206	29.6455	8.59108	0.149943	-185.686	0.300265
47.273	16.439	1	1	3	0	0	-0.140012	0.0694081	2.96637	8.591	-0.185227	17.2038	-0.140012	-1.40012	69.4081	29.6637	8.591	0.149941	-185.227	0.300264
47.284	16.45	1	1	3	0	0	-0.138764	0.0694042	2.96762	8.59351	-0.184147	17.2063	-0.138764	-1.38764	69.4042	29.6762	8.59351	0.149985	-184.147	0.300307
47.294	16.46	1	1	3	0	0	-0.136794	0.0696695	2.96959	8.59297	-0.187771	17.2058	-0.136794	-1.36794	69.6695	29.6959	8.59297	0.149976	-187.771	0.300298
47.305	16.471	1	1	3	0	0	-0.135269	0.0692684	2.97111	8.59189	-0.184638	17.2047	-0.135269	-1.35269	69.2684	29.7111	8.59189	0.149957	-184.638	0.300279
47.316	16.482	1	1	3	0	0	-0.133305	0.0696354	2.97308	8.59152	-0.189237	17.2044	-0.133305	-1.33305	69.6354	29.7308	8.59152	0.14995	-189.237	0.300273
47.327	16.493	1	1	3	0	0	-0.131565	0.0697796	2.97482	8.59439	-0.18083	17.2072	-0.131565	-1.31565	69.7796	29.7482	8.59439	0.15	-180.83	0.300323
47.337	16.503	1	1	3	0	0	-0.129926	0.0693732	2.97646	8.58936	-0.183125	17.2022	-0.129926	-1.29926	69.3732	29.7646	8.58936	0.149913	-183.125	0.300235
47.348	16.514	1	1	3	0	0	-0.128168	0.0696271	2.97821	8.5945	-0.178425	17.2073	-0.128168	-1.28168	69.6271	29.7821	8.5945	0.150002	-178.425	0.300325
47.358	16.524	1	1	3	0	0	-0.126141	0.0699683	2.98024	8.59283	-0.189646	17.2057	-0.126141	-1.26141	69.9683	29.8024	8.59283	0.149973	-189.646	0.300296
47.369	16.535	1	1	3	0	0	-0.124265	0.0698526	2.98212	8.59294	-0.189653	17.2058	-0.124265	-1.24265	69.8526	29.8212	8.59294	0.149975	-189.653	0.300298
47.38	16.546	1	1	3	0	0	-0.122366	0.0699949	2.98402	8.59305	-0.178407	17.2059	-0.122366	-1.22366	69.9949	29.8402	8.59305	0.149977	-178.407	0.300299
47.391	16.557	1	1	3	0	0	-0.12095	0.0697563	2.98543	8.59261	-0.162814	17.2054	-0.12095	-1.2095	69.7563	29.8543	8.59261	0.149969	-162.814	0.300292
47.401	16.567	1	1	3	0	0	-0.119275	0.0694555	2.98711	8.5922	-0.16989	17.205	-0.119275	-1.19275	69.4555	29.8711	8.5922	0.149962	-169.89	0.300285
47.412	16.578	1	1	3	0	0	-0.117593	0.0696973	2.98879	8.59435	-0.166872	17.2072	-0.117593	-1.17593	69.6973	29.8879	8.59435	0.15	-166.872	0.300322
47.422	16.588	1	1	3	0	0	-0.116046	0.0700641	2.99034	8.5931	-0.183756	17.2059	-0.116046	-1.16046	70.0641	29.9034	8.5931	0.149978	-183.756	0.3003
47.433	16.599	1	1	3	0	0	-0.113703	0.0700363	2.99268	8.59387	-0.176172	17.2067	-0.113703	-1.13703	70.0363	29.9268	8.59387	0.149991	-176.172	0.300314
47.444	16.61	1	1	3	0	0	-0.112354	0.0697975	2.99403	8.59138	-0.176862	17.2042	-0.112354	-1.12354	69.7975	29.9403	8.59138	0.149948	-176.862	0.30027
47.455	16.621	1	1	3	0	0	-0.109946	0.0700936	2.99644	8.59434	-0.176643	17.2072	-0.109946	-1.09946	70.0936	29.9644	8.59434	0.15	-176.643	0.300322
47.465	16.631	1	1	3	0	0	-0.108774	0.0698073	2.99761	8.59339	-0.175916	17.2062	-0.108774	-1.08774	69.8073	29.9761	8.59339	0.149983	-175.916	0.300305
47.476	16.642	1	1	3	0	0	-0.106598	0.0702165	2.99978	8.59262	-0.179589	17.2055	-0.106598	-1.06598	70.2165	29.9978	8.59262	0.14997	-179.589	0.300292
47.486	16.652	1	1	3	0	0	-0.105024	0.070244	3.00136	8.59261	-0.19601	17.2054	-0.105024	-1.05024	70.244	30.0136	8.59261	0.149969	-196.01	0.300292
47.497	16.663	1	1	3	0	0	-0.102855	0.070172	3.00353	8.58919	-0.184628	17.202	-0.102855	-1.02855	70.172	30.0353	8.58919	0.14991	-184.628	0.300232
47.508	16.674	1	1	3	0	0	-0.10092	0.0704636	3.00546	8.59033	-0.18698	17.2032	-0.10092	-1.0092	70.4636	30.0546	8.59033	0.149929	-186.98	0.300252
47.519	16.685	1	1	3	0	0	-0.0990687	0.0699648	3.00731	8.58954	-0.174756	17.2024	-0.0990687	-0.990687	69.9648	30.0731	8.58954	0.149916	-174.756	0.300238
47.529	16.695	1	1	3	0	0	-0.0976663	0.0701396	3.00872	8.59465	-0.195488	17.2075	-0.0976663	-0.976663	70.1396	30.0872	8.59465	0.150005	-195.488	0.300327
47.54	16.706	1	1	3	0	0	-0.0965101	0.0702387	3.00987	8.59364	-0.188512	17.2065	-0.0965101	-0.965101	70.2387	30.0987	8.59364	0.149987	-188.512	0.30031
47.55	16.716	1	1	3	0	0	-0.0945355	0.0701647	3.01185	8.59049	-0.18728	17.2033	-0.0945355	-0.945355	70.1647	30.1185	8.59049	0.149932	-187.28	0.300255
47.561	16.727	1	1	3	0	0	-0.0927092	0.0702473	3.01367	8.59379	-0.193017	17.2066	-0.0927092	-0.927092	70.2473	30.1367	8.59379	0.14999	-193.017	0.300312
47.572	16.738	1	1	3	0	0	-0.0909851	0.0704894	3.0154	8.5945	-0.183596	17.2073	-0.0909851	-0.909851	70.4894	30.154	8.5945	0.150002	-183.596	0.300325
47.583	16.749	1	1	3	0	0	-0.0893592	0.0699792	3.01702	8.59417	-0.17804	17.207	-0.0893592	-0.893592	69.9792	30.1702	8.59417	0.149997	-178.04	0.300319
47.593	16.759	1	1	3	0	0	-0.0873595	0.0705726	3.01902	8.59193	-0.177444	17.2048	-0.0873595	-0.873595	70.5726	30.1902	8.59193	0.149957	-177.444	0.30028
47.604	16.77	1	1	3	0	0	-0.0856584	0.0705997	3.02072	8.59066	-0.170277	17.2035	-0.0856584	-0.856584	70.5997	30.2072	8.59066	0.149935	-170.277	0.300258
47.614	16.78	1	1	3	0	0	-0.0835884	0.0705279	3.02279	8.59433	-0.193611	17.2072	-0.0835884	-0.835884	70.5279	30.2279	8.59433	0.149999	-193.611	0.300322
47.625	16.791	1	1	3	0	0	-0.0824388	0.0704083	3.02394	8.59147	-0.190866	17.2043	-0.0824388	-0.824388	70.4083	30.2394	8.59147	0.14995	-190.866	0.300272
47.636	16.802	1	1	3	0	0	-0.0807146	0.0705952	3.02567	8.59203	-0.184119	17.2049	-0.0807146	-0.807146	70.5952	30.2567	8.59203	0.149959	-184.119	0.300282
47.647	16.813	1	1	3	0	0	-0.0785635	0.0703853	3.02782	8.59437	-0.171461	17.2072	-0.0785635	-0.785635	70.3853	30.2782	8.59437	0.15	-171.461	0.300322
47.657	16.823	1	1	3	0	0	-0.0767882	0.0707496	3.02959	8.59458	-0.179186	17.2074	-0.0767882	-0.767882	70.7496	30.2959	8.59458	0.150004	-179.186	0.300326
47.668	16.834	1	1	3	0	0	-0.0746191	0.0709716	3.03176	8.59116	-0.178629	17.204	-0.0746191	-0.746191	70.9716	30.3176	8.59116	0.149944	-178.629	0.300266
47.678	16.844	1	1	3	0	0	-0.072856	0.0707916	3.03353	8.59345	-0.171658	17.2063	-0.072856	-0.72856	70.7916	30.3353	8.59345	0.149984	-171.658	0.300307
47.689	16.855	1	1	3	0	0	-0.0712694	0.0710561	3.03511	8.59174	-0.171674	17.2046	-0.0712694	-0.712694	71.0561	30.3511	8.59174	0.149954	-171.674	0.300277
47.7	16.866	1	1	3	0	0	-0.0695917	0.0710368	3.03679	8.59333	-0.169281	17.2062	-0.0695917	-0.695917	71.0368	30.3679	8.59333	0.149982	-169.281	0.300304
47.711	16.877	1	1	3	0	0	-0.0675814	0.0707142	3.0388	8.5929	-0.176947	17.2057	-0.0675814	-0.675814	70.7142	30.388	8.5929	0.149974	-176.947	0.300297
47.721	16.887	1	1	3	0	0	-0.0657897	0.0711372	3.04059	8.59333	-0.17421	17.2062	-0.0657897	-0.657897	71.1372	30.4059	8.59333	0.149982	-174.21	0.300304
47.732	16.898	1	1	3	0	0	-0.0638232	0.071241	3.04256	8.59152	-0.174906	17.2044	-0.0638232	-0.638232	71.241	30.4256	8.59152	0.14995	-174.906	0.300273
47.742	16.908	1	1	3	0	0	-0.0626658	0.0707384	3.04372	8.59172	-0.170813	17.2046	-0.0626658	-0.626658	70.7384	30.4372	8.59172	0.149954	-170.813	0.300276
47.753	16.919	1	1	3	0	0	-0.060715	0.071249	3.04567	8.5935	-0.17599	17.2063	-0.060715	-0.60715	71.249	30.4567	8.5935	0.149985	-175.99	0.300307
47.764	16.93	1	1	3	0	0	-0.0585664	0.0711177	3.04782	8.59398	-0.186235	17.2068	-0.0585664	-0.585664	71.1177	30.4782	8.59398	0.149993	-186.235	0.300316
47.775	16.941	1	1	3	0	0	-0.0563512	0.0713947	3.05003	8.59146	-0.188011	17.2043	-0.0563512	-0.563512	71.3947	30.5003	8.59146	0.149949	-188.011	0.300272
47.785	16.951	1	1	3	0	0	-0.0550407	0.0712351	3.05134	8.59356	-0.185722	17.2064	-0.0550407	-0.550407	71.2351	30.5134	8.59356	0.149986	-185.722	0.300308
47.796	16.962	1	1	3	0	0	-0.0535052	0.0708138	3.05288	8.593	-0.188239	17.2058	-0.0535052	-0.535052	70.8138	30.5288	8.593	0.149976	-188.239	0.300298
47.806	16.972	1	1	3	0	0	-0.0515965	0.0711099	3.05479	8.59158	-0.161393	17.2044	-0.0515965	-0.515965	71.1099	30.5479	8.59158	0.149951	-161.393	0.300274
47.817	16.983	1	1	3	0	0	-0.0498205	0.0713796	3.05656	8.59337	-0.170213	17.2062	-0.0498205	-0.498205	71.3796	30.5656	8.59337	0.149983	-170.213	0.300305
47.828	16.994	1	1	3	0	0	-0.0481147	0.0710955	3.05827	8.59238	-0.178914	17.2052	-0.0481147	-0.481147	71.0955	30.5827	8.59238	0.149965	-178.914	0.300288
47.839	17.005	1	1	3	0	0	-0.0460232	0.0712555	3.06036	8.59366	-0.185297	17.2065	-0.0460232	-0.460232	71.2555	30.6036	8.59366	0.149988	-185.297	0.30031
47.849	17.015	1	1	3	0	0	-0.0446085	0.0714965	3.06177	8.5927	-0.180884	17.2055	-0.0446085	-0.446085	71.4965	30.6177	8.5927	0.149971	-180.884	0.300293
47.86	17.026	1	1	3	0	0	-0.0426236	0.0712524	3.06376	8.59202	-0.179732	17.2049	-0.0426236	-0.426236	71.2524	30.6376	8.59202	0.149959	-179.732	0.300281
47.87	17.036	1	1	3	0	0	-0.0409661	0.0713317	3.06542	8.59269	-0.183207	17.2055	-0.0409661	-0.409661	71.3317	30.6542	8.59269	0.149971	-183.207	0.300293
47.881	17.047	1	1	3	0	0	-0.0388032	0.0715965	3.06758	8.59215	-0.189687	17.205	-0.0388032	-0.388032	71.5965	30.6758	8.59215	0.149961	-189.687	0.300284
47.892	17.058	1	1	3	0	0	-0.0371516	0.0714498	3.06923	8.5939	-0.185884	17.2067	-0.0371516	-0.371516	71.4498	30.6923	8.5939	0.149992	-185.884	0.300314
47.903	17.069	1	1	3	0	0	-0.0350063	0.0716835	3.07138	8.58952	-0.185855	17.2024	-0.0350063	-0.350063	71.6835	30.7138	8.58952	0.149915	-185.855	0.300238
47.913	17.079	1	1	3	0	0	-0.0335711	0.0717909	3.07281	8.5924	-0.176371	17.2052	-0.0335711	-0.335711	71.7909	30.7281	8.5924	0.149966	-176.371	0.300288
47.924	17.09	1	1	3	0	0	-0.0319721	0.0714105	3.07441	8.59409	-0.181518	17.2069	-0.0319721	-0.319721	71.4105	30.7441	8.59409	0.149995	-181.518	0.300318
47.935	17.101	1	1	3	0	0	-0.02957	0.0719198	3.07681	8.59288	-0.179517	17.2057	-0.02957	-0.2957	71.9198	30.7681	8.59288	0.149974	-179.517	0.300296
47.946	17.112	1	1	3	0	0	-0.0280883	0.0722365	3.07829	8.59433	-0.178545	17.2072	-0.0280883	-0.280883	72.2365	30.7829	8.59433	0.149999	-178.545	0.300322
47.956	17.122	1	1	3	0	0	-0.0264223	0.0719222	3.07996	8.59255	-0.183172	17.2054	-0.0264223	-0.264223	71.9222	30.7996	8.59255	0.149968	-183.172	0.300291
47.967	17.133	1	1	3	0	0	-0.024425	0.0721932	3.08196	8.59338	-0.193461	17.2062	-0.024425	-0.24425	72.1932	30.8196	8.59338	0.149983	-193.461	0.300305
47.977	17.143	1	1	3	0	0	-0.0226672	0.072421	3.08372	8.59483	-0.18422	17.2077	-0.0226672	-0.226672	72.421	30.8372	8.59483	0.150008	-184.22	0.30033
47.988	17.154	1	1	3	0	0	-0.0213494	0.071825	3.08503	8.59112	-0.193064	17.204	-0.0213494	-0.213494	71.825	30.8503	8.59112	0.149943	-193.064	0.300266
47.999	17.165	1	1	3	0	0	-0.0192022	0.0721668	3.08718	8.59374	-0.192363	17.2066	-0.0192022	-0.192022	72.1668	30.8718	8.59374	0.149989	-192.363	0.300311
48.01	17.176	1	1	3	0	0	-0.017396	0.0723016	3.08899	8.59151	-0.179774	17.2044	-0.017396	-0.17396	72.3016	30.8899	8.59151	0.14995	-179.774	0.300273
48.02	17.186	1	1	3	0	0	-0.0159976	0.072069	3.09038	8.59032	-0.192493	17.2032	-0.0159976	-0.159976	72.069	30.9038	8.59032	0.149929	-192.493	0.300252
48.031	17.197	1	1	3	0	0	-0.0138381	0.0722421	3.09254	8.59353	-0.188384	17.2064	-0.0138381	-0.138381	72.2421	30.9254	8.59353	0.149985	-188.384	0.300308
48.041	17.207	1	1	3	0	0	-0.0125478	0.0724056	3.09383	8.59404	-0.18656	17.2069	-0.0125478	-0.125478	72.4056	30.9383	8.59404	0.149994	-186.56	0.300317
48.052	17.218	1	1	3	0	0	-0.0105969	0.0721845	3.09579	8.59333	-0.183473	17.2062	-0.0105969	-0.105969	72.1845	30.9579	8.59333	0.149982	-183.473	0.300304
48.063	17.229	1	1	3	0	0	-0.00883416	0.0721344	3.09755	8.59144	-0.167876	17.2043	-0.00883416	-0.0883416	72.1344	30.9755	8.59144	0.149949	-167.876	0.300271
48.074	17.24	1	1	3	0	0	-0.00710224	0.0719113	3.09928	8.59242	-0.164038	17.2053	-0.00710224	-0.0710224	71.9113	30.9928	8.59242	0.149966	-164.038	0.300288
48.084	17.25	1	1	3	0	0	-0.00543175	0.0721773	3.10095	8.59436	-0.178074	17.2072	-0.00543175	-0.0543175	72.1773	31.0095	8.59436	0.15	-178.074	0.300322
48.095	17.261	1	1	3	0	0	-0.00327143	0.0722283	3.10311	8.59003	-0.170344	17.2029	-0.00327143	-0.0327143	72.2283	31.0311	8.59003	0.149924	-170.344	0.300247
48.105	17.271	1	1	3	0	0	-0.00169393	0.0719264	3.10469	8.59238	-0.18168	17.2052	-0.00169393	-0.0169393	71.9264	31.0469	8.59238	0.149965	-181.68	0.300288
48.116	17.282	1	1	3	0	0	0.000453517	0.0723727	3.10684	8.59408	-0.176734	17.2069	0.000453517	0.00453517	72.3727	31.0684	8.59408	0.149995	-176.734	0.300317
48.127	17.293	1	1	3	0	0	0.00222802	0.0724983	3.10861	8.59147	-0.175108	17.2043	0.00222802	0.0222802	72.4983	31.0861	8.59147	0.14995	-175.108	0.300272
48.138	17.304	1	1	3	0	0	0.00416866	0.0722352	3.11055	8.59346	-0.180718	17.2063	0.00416866	0.0416866	72.2352	31.1055	8.59346	0.149984	-180.718	0.300307
48.148	17.314	1	1	3	0	0	0.00561235	0.0723133	3.11199	8.59039	-0.177979	17.2032	0.00561235	0.0561235	72.3133	31.1199	8.59039	0.149931	-177.979	0.300253
48.159	17.325	1	1	3	0	0	0.00822555	0.0726936	3.11461	8.59473	-0.181728	17.2076	0.00822555	0.0822555	72.6936	31.1461	8.59473	0.150006	-181.728	0.300329
48.169	17.335	1	1	3	0	0	0.00955939	0.0722949	3.11594	8.59489	-0.187152	17.2077	0.00955939	0.0955939	72.2949	31.1594	8.59489	0.150009	-187.152	0.300331
48.18	17.346	1	1	3	0	0	0.0116093	0.0725323	3.11799	8.59253	-0.180196	17.2054	0.0116093	0.116093	72.5323	31.1799	8.59253	0.149968	-180.196	0.30029
48.191	17.357	1	1	3	0	0	0.0137389	0.0728258	3.12012	8.59455	-0.181542	17.2074	0.0137389	0.137389	72.8258	31.2012	8.59455	0.150003	-181.542	0.300326
48.202	17.368	1	1	3	0	0	0.0157924	0.0722147	3.12217	8.59142	-0.176254	17.2043	0.0157924	0.157924	72.2147	31.2217	8.59142	0.149948	-176.254	0.300271
48.212	17.378	1	1	3	0	0	0.0172487	0.0724685	3.12363	8.5945	-0.186328	17.2073	0.0172487	0.172487	72.4685	31.2363	8.5945	0.150002	-186.328	0.300325
48.223	17.389	1	1	3	0	0	0.018792	0.072494	3.12517	8.59327	-0.180154	17.2061	0.018792	0.18792	72.494	31.2517	8.59327	0.149981	-180.154	0.300303
48.233	17.399	1	1	3	0	0	0.0207606	0.0723653	3.12714	8.59179	-0.180812	17.2046	0.0207606	0.207606	72.3653	31.2714	8.59179	0.149955	-180.812	0.300277
48.244	17.41	1	1	3	0	0	0.0225317	0.072436	3.12891	8.59168	-0.176111	17.2045	0.0225317	0.225317	72.436	31.2891	8.59168	0.149953	-176.111	0.300276
48.255	17.421	1	1	3	0	0	0.0246469	0.07267	3.13103	8.59331	-0.170384	17.2062	0.0246469	0.246469	72.67	31.3103	8.59331	0.149982	-170.384	0.300304
48.266	17.432	1	1	3	0	0	0.0264155	0.0724173	3.1328	8.59432	-0.176142	17.2072	0.0264155	0.264155	72.4173	31.328	8.59432	0.149999	-176.142	0.300321
48.276	17.442	1	1	3	0	0	0.0281623	0.0723568	3.13454	8.59524	-0.178985	17.2081	0.0281623	0.281623	72.3568	31.3454	8.59524	0.150015	-178.985	0.300338
48.287	17.453	1	1	3	0	0	0.0297415	0.072464	3.13612	8.59319	-0.169656	17.206	0.0297415	0.297415	72.464	31.3612	8.59319	0.149979	-169.656	0.300302
48.297	17.463	1	1	3	0	0	0.032226	0.0723016	3.13861	8.59392	-0.178482	17.2068	0.032226	0.32226	72.3016	31.3861	8.59392	0.149992	-178.482	0.300315
48.308	17.474	1	1	3	0	0	0.0340789	0.072341	3.14046	8.5934	-0.163609	17.2062	0.0340789	0.340789	72.341	31.4046	8.5934	0.149983	-163.609	0.300306
48.319	17.485	1	1	3	0	0	0.0360251	0.0725044	3.14241	8.59326	-0.170206	17.2061	0.0360251	0.360251	72.5044	31.4241	8.59326	0.149981	-170.206	0.300303
48.33	17.496	1	1	3	0	0	0.0378879	0.0719452	3.14427	8.59369	-0.180805	17.2065	0.0378879	0.378879	71.9452	31.4427	8.59369	0.149988	-180.805	0.300311
48.34	17.506	1	1	3	0	0	0.0395315	0.0719744	3.14591	8.59056	-0.16692	17.2034	0.0395315	0.395315	71.9744	31.4591	8.59056	0.149934	-166.92	0.300256
48.351	17.517	1	1	3	0	0	0.0417089	0.0718094	3.14809	8.59169	-0.178688	17.2045	0.0417089	0.417089	71.8094	31.4809	8.59169	0.149953	-178.688	0.300276
48.361	17.527	1	1	3	0	0	0.043359	0.0715603	3.14974	8.59182	-0.16574	17.2047	0.043359	0.43359	71.5603	31.4974	8.59182	0.149956	-165.74	0.300278
48.372	17.538	1	1	3	0	0	0.0454551	0.0718186	3.15184	8.59176	-0.178607	17.2046	0.0454551	0.454551	71.8186	31.5184	8.59176	0.149955	-178.607	0.300277
48.383	17.549	1	1	3	0	0	0.0473421	0.0711453	3.15372	8.59194	-0.183849	17.2048	0.0473421	0.473421	71.1453	31.5372	8.59194	0.149958	-183.849	0.30028
48.394	17.56	1	1	3	0	0	0.0498407	0.0712957	3.15622	8.59095	-0.182233	17.2038	0.0498407	0.498407	71.2957	31.5622	8.59095	0.14994	-182.233	0.300263
48.404	17.57	1	1	3	0	0	0.051112	0.0708985	3.15749	8.59214	-0.188328	17.205	0.051112	0.51112	70.8985	31.5749	8.59214	0.149961	-188.328	0.300283
48.415	17.581	1	1	3	0	0	0.0536153	0.0705236	3.16	8.59385	-0.184261	17.2067	0.0536153	0.536153	70.5236	31.6	8.59385	0.149991	-184.261	0.300313
48.425	17.591	1	1	3	0	0	0.055832	0.0707741	3.16221	8.59105	-0.188214	17.2039	0.055832	0.55832	70.7741	31.6221	8.59105	0.149942	-188.214	0.300265
48.436	17.602	1	1	3	0	0	0.0575347	0.0704114	3.16392	8.59148	-0.185278	17.2043	0.0575347	0.575347	70.4114	31.6392	8.59148	0.14995	-185.278	0.300272
48.447	17.613	1	1	3	0	0	0.0596263	0.0699622	3.16601	8.59436	-0.178884	17.2072	0.0596263	0.596263	69.9622	31.6601	8.59436	0.15	-178.884	0.300322
48.458	17.624	1	1	3	0	0	0.0615094	0.0699304	3.16789	8.59321	-0.1791	17.206	0.0615094	0.615094	69.9304	31.6789	8.59321	0.14998	-179.1	0.300302
48.468	17.634	1	1	3	0	0	0.0635952	0.0701177	3.16998	8.59166	-0.190084	17.2045	0.0635952	0.635952	70.1177	31.6998	8.59166	0.149953	-190.084	0.300275
48.479	17.645	1	1	3	0	0	0.065877	0.0696202	3.17226	8.59124	-0.183609	17.2041	0.065877	0.65877	69.6202	31.7226	8.59124	0.149945	-183.609	0.300268
48.489	17.655	1	1	3	0	0	0.0671875	0.0692871	3.17357	8.59457	-0.189741	17.2074	0.0671875	0.671875	69.2871	31.7357	8.59457	0.150004	-189.741	0.300326
48.5	17.666	1	1	3	0	0	0.0686429	0.0691912	3.17503	8.59181	-0.189879	17.2046	0.0686429	0.686429	69.1912	31.7503	8.59181	0.149955	-189.879	0.300278
48.511	17.677	1	1	3	0	0	0.0708041	0.0688618	3.17719	8.59376	-0.182503	17.2066	0.0708041	0.708041	68.8618	31.7719	8.59376	0.149989	-182.503	0.300312
48.522	17.688	1	1	3	0	0	0.0728166	0.0688448	3.1792	8.5922	-0.179582	17.205	0.0728166	0.728166	68.8448	31.792	8.5922	0.149962	-179.582	0.300285
48.532	17.698	1	1	3	0	0	0.0742605	0.0686676	3.18064	8.59339	-0.178362	17.2062	0.0742605	0.742605	68.6676	31.8064	8.59339	0.149983	-178.362	0.300305
48.543	17.709	1	1	3	0	0	0.0760183	0.0681269	3.1824	8.5895	-0.167785	17.2023	0.0760183	0.760183	68.1269	31.824	8.5895	0.149915	-167.785	0.300237
48.553	17.719	1	1	3	0	0	0.0779648	0.0683247	3.18435	8.59083	-0.198836	17.2037	0.0779648	0.779648	68.3247	31.8435	8.59083	0.149938	-198.836	0.300261
48.564	17.73	1	1	3	0	0	0.0796585	0.0682009	3.18604	8.59306	-0.194902	17.2059	0.0796585	0.796585	68.2009	31.8604	8.59306	0.149977	-194.902	0.3003
48.575	17.741	1	1	3	0	0	0.0817576	0.0677366	3.18814	8.59321	-0.19137	17.206	0.0817576	0.817576	67.7366	31.8814	8.59321	0.14998	-191.37	0.300302
48.586	17.752	1	1	3	0	0	0.0831315	0.0675771	3.18951	8.5892	-0.180861	17.202	0.0831315	0.831315	67.5771	31.8951	8.5892	0.14991	-180.861	0.300232
48.596	17.762	1	1	3	0	0	0.0849442	0.0678362	3.19133	8.59202	-0.179294	17.2049	0.0849442	0.849442	67.8362	31.9133	8.59202	0.149959	-179.294	0.300281
48.607	17.773	1	1	3	0	0	0.0868122	0.0671375	3.19319	8.59345	-0.186705	17.2063	0.0868122	0.868122	67.1375	31.9319	8.59345	0.149984	-186.705	0.300307
48.617	17.783	1	1	3	0	0	0.0882949	0.0670613	3.19468	8.59047	-0.187139	17.2033	0.0882949	0.882949	67.0613	31.9468	8.59047	0.149932	-187.139	0.300254
48.628	17.794	1	1	3	0	0	0.0903601	0.0672792	3.19674	8.59186	-0.185492	17.2047	0.0903601	0.903601	67.2792	31.9674	8.59186	0.149956	-185.492	0.300279
48.639	17.805	1	1	3	0	0	0.0922283	0.0666901	3.19861	8.59015	-0.182356	17.203	0.0922283	0.922283	66.6901	31.9861	8.59015	0.149926	-182.356	0.300249
48.65	17.816	1	1	3	0	0	0.0939857	0.0665771	3.20037	8.59178	-0.178511	17.2046	0.0939857	0.939857	66.5771	32.0037	8.59178	0.149955	-178.511	0.300277
48.66	17.826	1	1	3	0	0	0.0958181	0.0664382	3.2022	8.58837	-0.180045	17.2012	0.0958181	0.958181	66.4382	32.022	8.58837	0.149895	-180.045	0.300218
48.671	17.837	1	1	3	0	0	0.0981089	0.0662266	3.20449	8.59186	-0.187436	17.2047	0.0981089	0.981089	66.2266	32.0449	8.59186	0.149956	-187.436	0.300279
48.681	17.847	1	1	3	0	0	0.0991319	0.0657801	3.20551	8.59363	-0.17729	17.2065	0.0991319	0.991319	65.7801	32.0551	8.59363	0.149987	-177.29	0.30031
48.692	17.858	1	1	3	0	0	0.101059	0.0653378	3.20744	8.59205	-0.179357	17.2049	0.101059	1.01059	65.3378	32.0744	8.59205	0.14996	-179.357	0.300282
48.703	17.869	1	1	3	0	0	0.103253	0.0655643	3.20964	8.59174	-0.168308	17.2046	0.103253	1.03253	65.5643	32.0964	8.59174	0.149954	-168.308	0.300277
48.714	17.88	1	1	3	0	0	0.105304	0.0657095	3.21169	8.59325	-0.169606	17.2061	0.105304	1.05304	65.7095	32.1169	8.59325	0.14998	-169.606	0.300303
48.724	17.89	1	1	3	0	0	0.106635	0.0647127	3.21302	8.59218	-0.163175	17.205	0.106635	1.06635	64.7127	32.1302	8.59218	0.149962	-163.175	0.300284
48.735	17.901	1	1	3	0	0	0.108635	0.0649255	3.21502	8.59343	-0.168124	17.2063	0.108635	1.08635	64.9255	32.1502	8.59343	0.149984	-168.124	0.300306
48.745	17.911	1	1	3	0	0	0.109856	0.0646014	3.21624	8.59376	-0.165742	17.2066	0.109856	1.09856	64.6014	32.1624	8.59376	0.149989	-165.742	0.300312
48.756	17.922	1	1	3	0	0	0.112369	0.0644393	3.21875	8.59445	-0.166882	17.2073	0.112369	1.12369	64.4393	32.1875	8.59445	0.150001	-166.882	0.300324
48.767	17.933	1	1	3	0	0	0.113931	0.0641637	3.22031	8.59407	-0.17399	17.2069	0.113931	1.13931	64.1637	32.2031	8.59407	0.149995	-173.99	0.300317
48.778	17.944	1	1	3	0	0	0.11578	0.064085	3.22216	8.59203	-0.178193	17.2049	0.11578	1.1578	64.085	32.2216	8.59203	0.149959	-178.193	0.300282
48.788	17.954	1	1	3	0	0	0.117955	0.0639295	3.22434	8.5922	-0.165208	17.205	0.117955	1.17955	63.9295	32.2434	8.5922	0.149962	-165.208	0.300285
48.799	17.965	1	1	3	0	0	0.120259	0.0636719	3.22664	8.59453	-0.163021	17.2074	0.120259	1.20259	63.6719	32.2664	8.59453	0.150003	-163.021	0.300325
48.81	17.976	1	1	3	0	0	0.121962	0.0636291	3.22834	8.59343	-0.155031	17.2063	0.121962	1.21962	63.6291	32.2834	8.59343	0.149984	-155.031	0.300306
48.821	17.987	1	1	3	0	0	0.123744	0.0631447	3.23013	8.59246	-0.156895	17.2053	0.123744	1.23744	63.1447	32.3013	8.59246	0.149967	-156.895	0.300289
48.831	17.997	1	1	3	0	0	0.125538	0.0628631	3.23192	8.59401	-0.166985	17.2068	0.125538	1.25538	62.8631	32.3192	8.59401	0.149994	-166.985	0.300316
48.842	18.008	1	1	3	0	0	0.127117	0.0629259	3.2335	8.59234	-0.161643	17.2052	0.127117	1.27117	62.9259	32.335	8.59234	0.149965	-161.643	0.300287
48.852	18.018	1	1	3	0	0	0.128955	0.0624526	3.23534	8.59388	-0.160548	17.2067	0.128955	1.28955	62.4526	32.3534	8.59388	0.149991	-160.548	0.300314
48.863	18.029	1	1	3	0	0	0.130668	0.062396	3.23705	8.59125	-0.159281	17.2041	0.130668	1.30668	62.396	32.3705	8.59125	0.149946	-159.281	0.300268
48.874	18.04	1	1	3	0	0	0.1325	0.0625105	3.23888	8.59404	-0.164172	17.2069	0.1325	1.325	62.5105	32.3888	8.59404	0.149994	-164.172	0.300317
48.885	18.051	1	1	3	0	0	0.134252	0.0621486	3.24063	8.59385	-0.173757	17.2067	0.134252	1.34252	62.1486	32.4063	8.59385	0.149991	-173.757	0.300313
48.895	18.061	1	1	3	0	0	0.13568	0.062143	3.24206	8.59326	-0.153969	17.2061	0.13568	1.3568	62.143	32.4206	8.59326	0.149981	-153.969	0.300303
48.906	18.072	1	1	3	0	0	0.137565	0.0619244	3.24395	8.59087	-0.169016	17.2037	0.137565	1.37565	61.9244	32.4395	8.59087	0.149939	-169.016	0.300261
48.916	18.082	1	1	3	0	0	0.139222	0.0615266	3.2456	8.59266	-0.159252	17.2055	0.139222	1.39222	61.5266	32.456	8.59266	0.14997	-159.252	0.300292
48.927	18.093	1	1	3	0	0	0.141378	0.0616931	3.24776	8.59245	-0.162469	17.2053	0.141378	1.41378	61.6931	32.4776	8.59245	0.149967	-162.469	0.300289
48.938	18.104	1	1	3	0	0	0.143479	0.0613702	3.24986	8.59223	-0.1686	17.2051	0.143479	1.43479	61.3702	32.4986	8.59223	0.149963	-168.6	0.300285
48.949	18.115	1	1	3	0	0	0.144778	0.0609428	3.25116	8.59431	-0.189193	17.2071	0.144778	1.44778	60.9428	32.5116	8.59431	0.149999	-189.193	0.300321
48.959	18.125	1	1	3	0	0	0.146249	0.0608248	3.25263	8.59325	-0.168251	17.2061	0.146249	1.46249	60.8248	32.5263	8.59325	0.149981	-168.251	0.300303
48.97	18.136	1	1	3	0	0	0.148457	0.0601181	3.25484	8.59086	-0.168992	17.2037	0.148457	1.48457	60.1181	32.5484	8.59086	0.149939	-168.992	0.300261
48.98	18.146	1	1	3	0	0	0.150432	0.0593352	3.25681	8.59342	-0.168269	17.2063	0.150432	1.50432	59.3352	32.5681	8.59342	0.149983	-168.269	0.300306
48.991	18.157	1	1	3	0	0	0.153071	0.0594062	3.25945	8.59412	-0.173382	17.207	0.153071	1.53071	59.4062	32.5945	8.59412	0.149996	-173.382	0.300318
49.002	18.168	1	1	3	0	0	0.154814	0.0583636	3.2612	8.5913	-0.179224	17.2041	0.154814	1.54814	58.3636	32.612	8.5913	0.149947	-179.224	0.300269
49.013	18.179	1	1	3	0	0	0.156536	0.0582924	3.26292	8.59328	-0.188083	17.2061	0.156536	1.56536	58.2924	32.6292	8.59328	0.149981	-188.083	0.300304
49.023	18.189	1	1	3	0	0	0.158334	0.0583298	3.26472	8.59013	-0.17113	17.203	0.158334	1.58334	58.3298	32.6472	8.59013	0.149926	-171.13	0.300248
49.034	18.2	1	1	3	0	0	0.160597	0.0576788	3.26698	8.59102	-0.180004	17.2039	0.160597	1.60597	57.6788	32.6698	8.59102	0.149942	-180.004	0.300264
49.044	18.21	1	1	3	0	0	0.162103	0.0574476	3.26849	8.59137	-0.181702	17.2042	0.162103	1.62103	57.4476	32.6849	8.59137	0.149948	-181.702	0.30027
49.055	18.221	1	1	3	0	0	0.164511	0.0574606	3.27089	8.59169	-0.187571	17.2045	0.164511	1.64511	57.4606	32.7089	8.59169	0.149953	-187.571	0.300276
49.066	18.232	1	1	3	0	0	0.166459	0.0566789	3.27284	8.59161	-0.174747	17.2045	0.166459	1.66459	56.6789	32.7284	8.59161	0.149952	-174.747	0.300274
49.077	18.243	1	1	3	0	0	0.168283	0.0566162	3.27467	8.59002	-0.167597	17.2029	0.168283	1.68283	56.6162	32.7467	8.59002	0.149924	-167.597	0.300246
49.087	18.253	1	1	3	0	0	0.170231	0.0566784	3.27661	8.58858	-0.183111	17.2014	0.170231	1.70231	56.6784	32.7661	8.58858	0.149899	-183.111	0.300221
49.098	18.264	1	1	3	0	0	0.172362	0.0559212	3.27874	8.59216	-0.184367	17.205	0.172362	1.72362	55.9212	32.7874	8.59216	0.149961	-184.367	0.300284
49.108	18.274	1	1	3	0	0	0.173747	0.0557218	3.28013	8.59181	-0.173109	17.2046	0.173747	1.73747	55.7218	32.8013	8.59181	0.149955	-173.109	0.300278
49.119	18.285	1	1	3	0	0	0.175775	0.0557271	3.28216	8.59295	-0.183021	17.2058	0.175775	1.75775	55.7271	32.8216	8.59295	0.149975	-183.021	0.300298
49.13	18.296	1	1	3	0	0	0.177543	0.0554192	3.28393	8.59271	-0.177185	17.2056	0.177543	1.77543	55.4192	32.8393	8.59271	0.149971	-177.185	0.300294
49.141	18.307	1	1	3	0	0	0.179164	0.0551447	3.28555	8.59396	-0.169204	17.2068	0.179164	1.79164	55.1447	32.8555	8.59396	0.149993	-169.204	0.300315
49.151	18.317	1	1	3	0	0	0.180254	0.0549435	3.28664	8.5943	-0.173766	17.2071	0.180254	1.80254	54.9435	32.8664	8.5943	0.149999	-173.766	0.300321
49.162	18.328	1	1	3	0	0	0.182064	0.0545109	3.28845	8.59324	-0.173345	17.2061	0.182064	1.82064	54.5109	32.8845	8.59324	0.14998	-173.345	0.300303
49.172	18.338	1	1	3	0	0	0.184137	0.054778	3.29052	8.5934	-0.189906	17.2062	0.184137	1.84137	54.778	32.9052	8.5934	0.149983	-189.906	0.300306
49.183	18.349	1	1	3	0	0	0.185871	0.0546922	3.29225	8.59433	-0.181181	17.2072	0.185871	1.85871	54.6922	32.9225	8.59433	0.149999	-181.181	0.300322
49.194	18.36	1	1	3	0	0	0.187631	0.0541261	3.29401	8.59075	-0.163633	17.2036	0.187631	1.87631	54.1261	32.9401	8.59075	0.149937	-163.633	0.300259
49.205	18.371	1	1	3	0	0	0.189312	0.0539663	3.29569	8.59344	-0.159274	17.2063	0.189312	1.89312	53.9663	32.9569	8.59344	0.149984	-159.274	0.300306
49.215	18.381	1	1	3	0	0	0.19122	0.0539287	3.2976	8.59345	-0.169296	17.2063	0.19122	1.9122	53.9287	32.976	8.59345	0.149984	-169.296	0.300307
49.226	18.392	1	1	3	0	0	0.193008	0.0531808	3.29939	8.59227	-0.160154	17.2051	0.193008	1.93008	53.1808	32.9939	8.59227	0.149963	-160.154	0.300286
49.236	18.402	1	1	3	0	0	0.194649	0.0531364	3.30103	8.59289	-0.1659	17.2057	0.194649	1.94649	53.1364	33.0103	8.59289	0.149974	-165.9	0.300297
49.247	18.413	1	1	3	0	0	0.196323	0.0528331	3.30271	8.5909	-0.160477	17.2037	0.196323	1.96323	52.8331	33.0271	8.5909	0.149939	-160.477	0.300262
49.258	18.424	1	1	3	0	0	0.19807	0.0523759	3.30445	8.58836	-0.159021	17.2012	0.19807	1.9807	52.3759	33.0445	8.58836	0.149895	-159.021	0.300218
49.269	18.435	1	1	3	0	0	0.199614	0.0521518	3.306	8.59188	-0.159203	17.2047	0.199614	1.99614	52.1518	33.06	8.59188	0.149957	-159.203	0.300279
49.279	18.445	1	1	3	0	0	0.201284	0.0516071	3.30767	8.58869	-0.166661	17.2015	0.201284	2.01284	51.6071	33.0767	8.58869	0.149901	-166.661	0.300223
49.29	18.456	1	1	3	0	0	0.203304	0.0517766	3.30969	8.59029	-0.164813	17.2031	0.203304	2.03304	51.7766	33.0969	8.59029	0.149929	-164.813	0.300251
49.3	18.466	1	1	3	0	0	0.204708	0.051351	3.31109	8.59384	-0.159756	17.2067	0.204708	2.04708	51.351	33.1109	8.59384	0.149991	-159.756	0.300313
49.311	18.477	1	1	3	0	0	0.206481	0.0507418	3.31286	8.59225	-0.15613	17.2051	0.206481	2.06481	50.7418	33.1286	8.59225	0.149963	-156.13	0.300286
49.322	18.488	1	1	3	0	0	0.208033	0.0505337	3.31442	8.59286	-0.167625	17.2057	0.208033	2.08033	50.5337	33.1442	8.59286	0.149974	-167.625	0.300296
49.333	18.499	1	1	3	0	0	0.21029	0.0506227	3.31667	8.59047	-0.180898	17.2033	0.21029	2.1029	50.6227	33.1667	8.59047	0.149932	-180.898	0.300254
49.343	18.509	1	1	3	0	0	0.211956	0.0498294	3.31834	8.59178	-0.157896	17.2046	0.211956	2.11956	49.8294	33.1834	8.59178	0.149955	-157.896	0.300277
49.354	18.52	1	1	3	0	0	0.21382	0.0499064	3.3202	8.59342	-0.173394	17.2063	0.21382	2.1382	49.9064	33.202	8.59342	0.149984	-173.394	0.300306
49.364	18.53	1	1	3	0	0	0.215712	0.0498995	3.32209	8.59322	-0.148258	17.2061	0.215712	2.15712	49.8995	33.2209	8.59322	0.14998	-148.258	0.300302
49.375	18.541	1	1	3	0	0	0.217807	0.0491124	3.32419	8.59058	-0.161194	17.2034	0.217807	2.17807	49.1124	33.2419	8.59058	0.149934	-161.194	0.300256
49.386	18.552	1	1	3	0	0	0.219735	0.0488486	3.32612	8.59029	-0.181981	17.2031	0.219735	2.19735	48.8486	33.2612	8.59029	0.149929	-181.981	0.300251
49.397	18.563	1	1	3	0	0	0.221787	0.048771	3.32817	8.59138	-0.187406	17.2042	0.221787	2.21787	48.771	33.2817	8.59138	0.149948	-187.406	0.30027
49.407	18.573	1	1	3	0	0	0.223541	0.0481495	3.32992	8.59326	-0.170097	17.2061	0.223541	2.23541	48.1495	33.2992	8.59326	0.149981	-170.097	0.300303
49.418	18.584	1	1	3	0	0	0.225424	0.0481706	3.33181	8.59239	-0.169009	17.2052	0.225424	2.25424	48.1706	33.3181	8.59239	0.149965	-169.009	0.300288
49.428	18.594	1	1	3	0	0	0.227073	0.0481466	3.33346	8.59035	-0.178414	17.2032	0.227073	2.27073	48.1466	33.3346	8.59035	0.14993	-178.414	0.300252
49.439	18.605	1	1	3	0	0	0.229092	0.0474031	3.33547	8.59187	-0.178475	17.2047	0.229092	2.29092	47.4031	33.3547	8.59187	0.149956	-178.475	0.300279
49.45	18.616	1	1	3	0	0	0.231248	0.0473901	3.33763	8.59084	-0.176482	17.2037	0.231248	2.31248	47.3901	33.3763	8.59084	0.149938	-176.482	0.300261
49.461	18.627	1	1	3	0	0	0.233186	0.0473441	3.33957	8.5909	-0.170993	17.2037	0.233186	2.33186	47.3441	33.3957	8.5909	0.149939	-170.993	0.300262
49.471	18.637	1	1	3	0	0	0.234949	0.0466074	3.34133	8.59363	-0.168423	17.2065	0.234949	2.34949	46.6074	33.4133	8.59363	0.149987	-168.423	0.30031
49.482	18.648	1	1	3	0	0	0.236727	0.0465942	3.34311	8.59143	-0.161514	17.2043	0.236727	2.36727	46.5942	33.4311	8.59143	0.149949	-161.514	0.300271
49.492	18.658	1	1	3	0	0	0.238284	0.0465848	3.34467	8.59169	-0.164274	17.2045	0.238284	2.38284	46.5848	33.4467	8.59169	0.149953	-164.274	0.300276
49.503	18.669	1	1	3	0	0	0.239557	0.0453325	3.34594	8.59279	-0.166692	17.2056	0.239557	2.39557	45.3325	33.4594	8.59279	0.149973	-166.692	0.300295
49.514	18.68	1	1	3	0	0	0.2419	0.0453995	3.34828	8.59257	-0.167137	17.2054	0.2419	2.419	45.3995	33.4828	8.59257	0.149969	-167.137	0.300291
49.525	18.691	1	1	3	0	0	0.243587	0.0450279	3.34997	8.5902	-0.163877	17.203	0.243587	2.43587	45.0279	33.4997	8.5902	0.149927	-163.877	0.30025
49.535	18.701	1	1	3	0	0	0.245726	0.0444438	3.35211	8.59017	-0.173225	17.203	0.245726	2.45726	44.4438	33.5211	8.59017	0.149927	-173.225	0.300249
49.546	18.712	1	1	3	0	0	0.247433	0.0442939	3.35382	8.59032	-0.17572	17.2032	0.247433	2.47433	44.2939	33.5382	8.59032	0.149929	-175.72	0.300252
49.556	18.722	1	1	3	0	0	0.249256	0.0442465	3.35564	8.5913	-0.166872	17.2041	0.249256	2.49256	44.2465	33.5564	8.5913	0.149947	-166.872	0.300269
49.567	18.733	1	1	3	0	0	0.251266	0.0439995	3.35765	8.59434	-0.161829	17.2072	0.251266	2.51266	43.9995	33.5765	8.59434	0.15	-161.829	0.300322
49.578	18.744	1	1	3	0	0	0.25296	0.043963	3.35934	8.5912	-0.161759	17.204	0.25296	2.5296	43.963	33.5934	8.5912	0.149945	-161.759	0.300267
49.589	18.755	1	1	3	0	0	0.254552	0.0434773	3.36093	8.5916	-0.164398	17.2044	0.254552	2.54552	43.4773	33.6093	8.5916	0.149952	-164.398	0.300274
49.599	18.765	1	1	3	0	0	0.255821	0.0433896	3.3622	8.59251	-0.161456	17.2054	0.255821	2.55821	43.3896	33.622	8.59251	0.149968	-161.456	0.30029
49.61	18.776	1	1	3	0	0	0.257017	0.0431873	3.3634	8.59306	-0.161141	17.2059	0.257017	2.57017	43.1873	33.634	8.59306	0.149977	-161.141	0.3003
49.62	18.786	1	1	3	0	0	0.258657	0.0429937	3.36504	8.59152	-0.157401	17.2044	0.258657	2.58657	42.9937	33.6504	8.59152	0.14995	-157.401	0.300273
49.631	18.797	1	1	3	0	0	0.260489	0.0429187	3.36687	8.59158	-0.162148	17.2044	0.260489	2.60489	42.9187	33.6687	8.59158	0.149951	-162.148	0.300274
49.642	18.808	1	1	3	0	0	0.261996	0.0428805	3.36838	8.59163	-0.169295	17.2045	0.261996	2.61996	42.8805	33.6838	8.59163	0.149952	-169.295	0.300275
49.653	18.819	1	1	3	0	0	0.263347	0.0424893	3.36973	8.5911	-0.167844	17.2039	0.263347	2.63347	42.4893	33.6973	8.5911	0.149943	-167.844	0.300265
49.663	18.829	1	1	3	0	0	0.264654	0.0425502	3.37104	8.59043	-0.151451	17.2033	0.264654	2.64654	42.5502	33.7104	8.59043	0.149931	-151.451	0.300254
49.674	18.84	1	1	3	0	0	0.266542	0.0426958	3.37292	8.59381	-0.163657	17.2066	0.266542	2.66542	42.6958	33.7292	8.59381	0.14999	-163.657	0.300313
49.685	18.851	1	1	3	0	0	0.267888	0.0421247	3.37427	8.59276	-0.162091	17.2056	0.267888	2.67888	42.1247	33.7427	8.59276	0.149972	-162.091	0.300294
49.696	18.862	1	1	3	0	0	0.269508	0.0421169	3.37589	8.59445	-0.161841	17.2073	0.269508	2.69508	42.1169	33.7589	8.59445	0.150001	-161.841	0.300324
49.706	18.872	1	1	3	0	0	0.270747	0.0422698	3.37713	8.59162	-0.155685	17.2045	0.270747	2.70747	42.2698	33.7713	8.59162	0.149952	-155.685	0.300274
49.717	18.883	1	1	3	0	0	0.272848	0.0418577	3.37923	8.59339	-0.163531	17.2062	0.272848	2.72848	41.8577	33.7923	8.59339	0.149983	-163.531	0.300305
49.727	18.893	1	1	3	0	0	0.274239	0.0420924	3.38062	8.59176	-0.157562	17.2046	0.274239	2.74239	42.0924	33.8062	8.59176	0.149955	-157.562	0.300277
49.738	18.904	1	1	3	0	0	0.276125	0.0421067	3.38251	8.58805	-0.161812	17.2009	0.276125	2.76125	42.1067	33.8251	8.58805	0.14989	-161.812	0.300212
49.749	18.915	1	1	3	0	0	0.277368	0.0415175	3.38375	8.59033	-0.179859	17.2032	0.277368	2.77368	41.5175	33.8375	8.59033	0.14993	-179.859	0.300252
49.76	18.926	1	1	3	0	0	0.278811	0.0414999	3.38519	8.59417	-0.190492	17.207	0.278811	2.78811	41.4999	33.8519	8.59417	0.149997	-190.492	0.300319
49.77	18.936	1	1	3	0	0	0.280447	0.0417424	3.38683	8.59056	-0.166916	17.2034	0.280447	2.80447	41.7424	33.8683	8.59056	0.149934	-166.916	0.300256
49.781	18.947	1	1	3	0	0	0.282093	0.0412655	3.38848	8.59042	-0.169132	17.2033	0.282093	2.82093	41.2655	33.8848	8.59042	0.149931	-169.132	0.300254
49.791	18.957	1	1	3	0	0	0.283714	0.0412307	3.3901	8.59125	-0.175878	17.2041	0.283714	2.83714	41.2307	33.901	8.59125	0.149946	-175.878	0.300268
49.802	18.968	1	1	3	0	0	0.285519	0.0412819	3.3919	8.59085	-0.182695	17.2037	0.285519	2.85519	41.2819	33.919	8.59085	0.149939	-182.695	0.300261
49.813	18.979	1	1	3	0	0	0.287852	0.0409624	3.39423	8.59118	-0.176698	17.204	0.287852	2.87852	40.9624	33.9423	8.59118	0.149944	-176.698	0.300267
49.824	18.99	1	1	3	0	0	0.28977	0.0409864	3.39615	8.59114	-0.167787	17.204	0.28977	2.8977	40.9864	33.9615	8.59114	0.149944	-167.787	0.300266
49.834	19	1	1	3	0	0	0.291475	0.0409803	3.39786	8.58774	-0.161938	17.2006	0.291475	2.91475	40.9803	33.9786	8.58774	0.149884	-161.938	0.300207
49.845	19.011	1	1	3	0	0	0.292943	0.0404164	3.39933	8.59218	-0.185173	17.205	0.292943	2.92943	40.4164	33.9933	8.59218	0.149962	-185.173	0.300284
49.855	19.021	1	1	3	0	0	0.295009	0.0404175	3.40139	8.5915	-0.173264	17.2043	0.295009	2.95009	40.4175	34.0139	8.5915	0.14995	-173.264	0.300272
49.866	19.032	1	1	3	0	0	0.297087	0.0400622	3.40347	8.59016	-0.166	17.203	0.297087	2.97087	40.0622	34.0347	8.59016	0.149927	-166	0.300249
49.877	19.043	1	1	3	0	0	0.298975	0.0395522	3.40536	8.59162	-0.163627	17.2045	0.298975	2.98975	39.5522	34.0536	8.59162	0.149952	-163.627	0.300274
49.888	19.054	1	1	3	0	0	0.300775	0.0392717	3.40716	8.59353	-0.159342	17.2064	0.300775	3.00775	39.2717	34.0716	8.59353	0.149985	-159.342	0.300308
49.898	19.064	1	1	3	0	0	0.303204	0.0389205	3.40959	8.59266	-0.174522	17.2055	0.303204	3.03204	38.9205	34.0959	8.59266	0.14997	-174.522	0.300292
49.909	19.075	1	1	3	0	0	0.30503	0.0389189	3.41141	8.59203	-0.173824	17.2049	0.30503	3.0503	38.9189	34.1141	8.59203	0.149959	-173.824	0.300282
49.919	19.085	1	1	3	0	0	0.306831	0.038862	3.41321	8.59159	-0.158202	17.2044	0.306831	3.06831	38.862	34.1321	8.59159	0.149952	-158.202	0.300274
49.93	19.096	1	1	3	0	0	0.309255	0.0385292	3.41564	8.59248	-0.156483	17.2053	0.309255	3.09255	38.5292	34.1564	8.59248	0.149967	-156.483	0.300289
49.941	19.107	1	1	3	0	0	0.31088	0.038663	3.41726	8.5906	-0.163549	17.2034	0.31088	3.1088	38.663	34.1726	8.5906	0.149934	-163.549	0.300257
49.952	19.118	1	1	3	0	0	0.312417	0.0387779	3.4188	8.59155	-0.168007	17.2044	0.312417	3.12417	38.7779	34.188	8.59155	0.149951	-168.007	0.300273
49.962	19.128	1	1	3	0	0	0.314003	0.0380595	3.42039	8.59068	-0.168167	17.2035	0.314003	3.14003	38.0595	34.2039	8.59068	0.149936	-168.167	0.300258
49.973	19.139	1	1	3	0	0	0.316014	0.0380514	3.4224	8.59274	-0.162405	17.2056	0.316014	3.16014	38.0514	34.224	8.59274	0.149972	-162.405	0.300294
49.983	19.149	1	1	3	0	0	0.317436	0.0381389	3.42382	8.59215	-0.171052	17.205	0.317436	3.17436	38.1389	34.2382	8.59215	0.149961	-171.052	0.300284
49.994	19.16	1	1	3	0	0	0.319381	0.0376299	3.42576	8.59192	-0.172899	17.2048	0.319381	3.19381	37.6299	34.2576	8.59192	0.149957	-172.899	0.30028
50.005	19.171	1	1	3	0	0	0.321032	0.0375882	3.42741	8.59214	-0.171445	17.205	0.321032	3.21032	37.5882	34.2741	8.59214	0.149961	-171.445	0.300283
50.016	19.182	1	1	3	0	0	0.322895	0.0376935	3.42928	8.59145	-0.164763	17.2043	0.322895	3.22895	37.6935	34.2928	8.59145	0.149949	-164.763	0.300271
50.026	19.192	1	1	3	0	0	0.324151	0.0370886	3.43053	8.59246	-0.160326	17.2053	0.324151	3.24151	37.0886	34.3053	8.59246	0.149967	-160.326	0.300289
50.037	19.203	1	1	3	0	0	0.325737	0.0373641	3.43212	8.58855	-0.152817	17.2014	0.325737	3.25737	37.3641	34.3212	8.58855	0.149898	-152.817	0.300221
50.047	19.213	1	1	3	0	0	0.32715	0.0373885	3.43353	8.59041	-0.174317	17.2032	0.32715	3.2715	37.3885	34.3353	8.59041	0.149931	-174.317	0.300253
50.058	19.224	1	1	3	0	0	0.328883	0.0366726	3.43527	8.59269	-0.169663	17.2055	0.328883	3.28883	36.6726	34.3527	8.59269	0.149971	-169.663	0.300293
50.069	19.235	1	1	3	0	0	0.330891	0.0371787	3.43727	8.59093	-0.166521	17.2038	0.330891	3.30891	37.1787	34.3727	8.59093	0.14994	-166.521	0.300262
50.08	19.246	1	1	3	0	0	0.332748	0.0372802	3.43913	8.59016	-0.175077	17.203	0.332748	3.32748	37.2802	34.3913	8.59016	0.149927	-175.077	0.300249
50.09	19.256	1	1	3	0	0	0.333966	0.0366034	3.44035	8.59071	-0.168859	17.2035	0.333966	3.33966	36.6034	34.4035	8.59071	0.149936	-168.859	0.300259
50.101	19.267	1	1	3	0	0	0.335754	0.0369497	3.44214	8.59107	-0.170408	17.2039	0.335754	3.35754	36.9497	34.4214	8.59107	0.149943	-170.408	0.300265
50.111	19.277	1	1	3	0	0	0.337128	0.0370003	3.44351	8.591	-0.175525	17.2038	0.337128	3.37128	37.0003	34.4351	8.591	0.149941	-175.525	0.300264
50.122	19.288	1	1	3	0	0	0.338587	0.0364734	3.44497	8.59227	-0.174967	17.2051	0.338587	3.38587	36.4734	34.4497	8.59227	0.149963	-174.967	0.300286
50.133	19.299	1	1	3	0	0	0.340699	0.0368852	3.44708	8.59223	-0.161271	17.2051	0.340699	3.40699	36.8852	34.4708	8.59223	0.149963	-161.271	0.300285
50.144	19.31	1	1	3	0	0	0.342171	0.0367875	3.44855	8.59136	-0.161333	17.2042	0.342171	3.42171	36.7875	34.4855	8.59136	0.149947	-161.333	0.30027
50.154	19.32	1	1	3	0	0	0.343319	0.036512	3.4497	8.59127	-0.165087	17.2041	0.343319	3.43319	36.512	34.497	8.59127	0.149946	-165.087	0.300268
50.165	19.331	1	1	3	0	0	0.344979	0.0369324	3.45136	8.59204	-0.16277	17.2049	0.344979	3.44979	36.9324	34.5136	8.59204	0.149959	-162.77	0.300282
50.175	19.341	1	1	3	0	0	0.346677	0.0368447	3.45306	8.59142	-0.156303	17.2043	0.346677	3.46677	36.8447	34.5306	8.59142	0.149949	-156.303	0.300271
50.186	19.352	1	1	3	0	0	0.347911	0.0364682	3.45429	8.59469	-0.152784	17.2075	0.347911	3.47911	36.4682	34.5429	8.59469	0.150006	-152.784	0.300328
50.197	19.363	1	1	3	0	0	0.349694	0.0370099	3.45608	8.5909	-0.153023	17.2037	0.349694	3.49694	37.0099	34.5608	8.5909	0.14994	-153.023	0.300262
50.208	19.374	1	1	3	0	0	0.351379	0.0363805	3.45776	8.5909	-0.164167	17.2037	0.351379	3.51379	36.3805	34.5776	8.5909	0.14994	-164.167	0.300262
50.218	19.384	1	1	3	0	0	0.352942	0.0368599	3.45932	8.58707	-0.167201	17.1999	0.352942	3.52942	36.8599	34.5932	8.58707	0.149873	-167.201	0.300195
50.229	19.395	1	1	3	0	0	0.3544	0.0370462	3.46078	8.59019	-0.169555	17.203	0.3544	3.544	37.0462	34.6078	8.59019	0.149927	-169.555	0.30025
50.239	19.405	1	1	3	0	0	0.355687	0.0364406	3.46207	8.59206	-0.161238	17.2049	0.355687	3.55687	36.4406	34.6207	8.59206	0.14996	-161.238	0.300282
50.25	19.416	1	1	3	0	0	0.357474	0.0368935	3.46386	8.58945	-0.155604	17.2023	0.357474	3.57474	36.8935	34.6386	8.58945	0.149914	-155.604	0.300236
50.261	19.427	1	1	3	0	0	0.359506	0.0369518	3.46589	8.59012	-0.164845	17.203	0.359506	3.59506	36.9518	34.6589	8.59012	0.149926	-164.845	0.300248
50.272	19.438	1	1	3	0	0	0.361198	0.0368883	3.46758	8.591	-0.170577	17.2038	0.361198	3.61198	36.8883	34.6758	8.591	0.149941	-170.577	0.300264
50.282	19.448	1	1	3	0	0	0.362433	0.03683	3.46882	8.58799	-0.157813	17.2008	0.362433	3.62433	36.83	34.6882	8.58799	0.149889	-157.813	0.300211
50.293	19.459	1	1	3	0	0	0.36415	0.0372988	3.47053	8.58863	-0.155449	17.2015	0.36415	3.6415	37.2988	34.7053	8.58863	0.1499	-155.449	0.300222
50.303	19.469	1	1	3	0	0	0.365479	0.0369571	3.47186	8.58837	-0.160677	17.2012	0.365479	3.65479	36.9571	34.7186	8.58837	0.149895	-160.677	0.300218
50.314	19.48	1	1	3	0	0	0.367065	0.037069	3.47345	8.59155	-0.173679	17.2044	0.367065	3.67065	37.069	34.7345	8.59155	0.149951	-173.679	0.300273
50.325	19.491	1	1	3	0	0	0.368713	0.0373366	3.4751	8.59088	-0.170382	17.2037	0.368713	3.68713	37.3366	34.751	8.59088	0.149939	-170.382	0.300262
50.336	19.502	1	1	3	0	0	0.371104	0.0372491	3.47749	8.59205	-0.167104	17.2049	0.371104	3.71104	37.2491	34.7749	8.59205	0.14996	-167.104	0.300282
50.346	19.512	1	1	3	0	0	0.372723	0.0375955	3.47911	8.59056	-0.150346	17.2034	0.372723	3.72723	37.5955	34.7911	8.59056	0.149934	-150.346	0.300256
50.357	19.523	1	1	3	0	0	0.374317	0.0375534	3.4807	8.59173	-0.143695	17.2046	0.374317	3.74317	37.5534	34.807	8.59173	0.149954	-143.695	0.300276
50.367	19.533	1	1	3	0	0	0.375689	0.0372623	3.48207	8.58973	-0.147317	17.2026	0.375689	3.75689	37.2623	34.8207	8.58973	0.149919	-147.317	0.300242
50.378	19.544	1	1	3	0	0	0.377783	0.0375228	3.48417	8.59141	-0.142876	17.2042	0.377783	3.77783	37.5228	34.8417	8.59141	0.149948	-142.876	0.300271
50.389	19.555	1	1	3	0	0	0.379502	0.0377278	3.48588	8.58835	-0.155966	17.2012	0.379502	3.79502	37.7278	34.8588	8.58835	0.149895	-155.966	0.300217
50.4	19.566	1	1	3	0	0	0.381215	0.0374082	3.4876	8.59085	-0.180772	17.2037	0.381215	3.81215	37.4082	34.876	8.59085	0.149939	-180.772	0.300261
50.41	19.576	1	1	3	0	0	0.382658	0.0375933	3.48904	8.59116	-0.152144	17.204	0.382658	3.82658	37.5933	34.8904	8.59116	0.149944	-152.144	0.300266
50.421	19.587	1	1	3	0	0	0.383854	0.0375401	3.49024	8.59202	-0.168824	17.2049	0.383854	3.83854	37.5401	34.9024	8.59202	0.149959	-168.824	0.300281
50.431	19.597	1	1	3	0	0	0.385971	0.0376156	3.49235	8.59033	-0.147786	17.2032	0.385971	3.85971	37.6156	34.9235	8.59033	0.149929	-147.786	0.300252
50.442	19.608	1	1	3	0	0	0.387641	0.037596	3.49402	8.59131	-0.153301	17.2041	0.387641	3.87641	37.596	34.9402	8.59131	0.149947	-153.301	0.300269
50.453	19.619	1	1	3	0	0	0.389753	0.0376841	3.49614	8.59217	-0.174703	17.205	0.389753	3.89753	37.6841	34.9614	8.59217	0.149962	-174.703	0.300284
50.464	19.63	1	1	3	0	0	0.391432	0.0378409	3.49781	8.59112	-0.193565	17.204	0.391432	3.91432	37.8409	34.9781	8.59112	0.149943	-193.565	0.300266
50.474	19.64	1	1	3	0	0	0.393353	0.0380282	3.49974	8.58923	-0.17069	17.2021	0.393353	3.93353	38.0282	34.9974	8.58923	0.14991	-170.69	0.300233
50.485	19.651	1	1	3	0	0	0.39512	0.0375833	3.5015	8.59372	-0.184112	17.2066	0.39512	3.9512	37.5833	35.015	8.59372	0.149989	-184.112	0.300311
50.495	19.661	1	1	3	0	0	0.396637	0.0378489	3.50302	8.58989	-0.153546	17.2027	0.396637	3.96637	37.8489	35.0302	8.58989	0.149922	-153.546	0.300244
50.506	19.672	1	1	3	0	0	0.398299	0.0378587	3.50468	8.59167	-0.172094	17.2045	0.398299	3.98299	37.8587	35.0468	8.59167	0.149953	-172.094	0.300275
50.517	19.683	1	1	3	0	0	0.40021	0.0374858	3.50659	8.59445	-0.180581	17.2073	0.40021	4.0021	37.4858	35.0659	8.59445	0.150001	-180.581	0.300324
50.528	19.694	1	1	3	0	0	0.401499	0.0377225	3.50788	8.59016	-0.174906	17.203	0.401499	4.01499	37.7225	35.0788	8.59016	0.149926	-174.906	0.300249
50.538	19.704	1	1	3	0	0	0.403294	0.0377754	3.50968	8.59035	-0.174316	17.2032	0.403294	4.03294	37.7754	35.0968	8.59035	0.14993	-174.316	0.300252
50.549	19.715	1	1	3	0	0	0.405073	0.0375565	3.51146	8.59157	-0.184243	17.2044	0.405073	4.05073	37.5565	35.1146	8.59157	0.149951	-184.243	0.300274
50.559	19.725	1	1	3	0	0	0.406613	0.0375679	3.513	8.59173	-0.176492	17.2046	0.406613	4.06613	37.5679	35.13	8.59173	0.149954	-176.492	0.300276
50.57	19.736	1	1	3	0	0	0.408402	0.0379658	3.51478	8.5932	-0.170981	17.206	0.408402	4.08402	37.9658	35.1478	8.5932	0.14998	-170.981	0.300302
50.581	19.747	1	1	3	0	0	0.410321	0.0375324	3.5167	8.59095	-0.167031	17.2038	0.410321	4.10321	37.5324	35.167	8.59095	0.14994	-167.031	0.300263
50.592	19.758	1	1	3	0	0	0.412565	0.037754	3.51895	8.5934	-0.168842	17.2062	0.412565	4.12565	37.754	35.1895	8.5934	0.149983	-168.842	0.300305
50.602	19.768	1	1	3	0	0	0.414323	0.0379591	3.52071	8.59097	-0.159135	17.2038	0.414323	4.14323	37.9591	35.2071	8.59097	0.149941	-159.135	0.300263
50.613	19.779	1	1	3	0	0	0.416308	0.0376092	3.52269	8.59299	-0.15534	17.2058	0.416308	4.16308	37.6092	35.2269	8.59299	0.149976	-155.34	0.300298
50.624	19.79	1	1	3	0	0	0.41804	0.0377946	3.52442	8.59242	-0.168805	17.2053	0.41804	4.1804	37.7946	35.2442	8.59242	0.149966	-168.805	0.300288
50.635	19.801	1	1	3	0	0	0.419658	0.0377438	3.52604	8.59201	-0.18251	17.2048	0.419658	4.19658	37.7438	35.2604	8.59201	0.149959	-182.51	0.300281
50.645	19.811	1	1	3	0	0	0.421024	0.037003	3.52741	8.59084	-0.161311	17.2037	0.421024	4.21024	37.003	35.2741	8.59084	0.149938	-161.311	0.300261
50.656	19.822	1	1	3	0	0	0.423259	0.0375955	3.52964	8.5922	-0.16288	17.205	0.423259	4.23259	37.5955	35.2964	8.5922	0.149962	-162.88	0.300285
50.666	19.832	1	1	3	0	0	0.42501	0.0377467	3.53139	8.58965	-0.159243	17.2025	0.42501	4.2501	37.7467	35.3139	8.58965	0.149918	-159.243	0.30024
50.677	19.843	1	1	3	0	0	0.427296	0.0374994	3.53368	8.59043	-0.162999	17.2033	0.427296	4.27296	37.4994	35.3368	8.59043	0.149931	-162.999	0.300254
50.688	19.854	1	1	3	0	0	0.429423	0.0377374	3.53581	8.58923	-0.174542	17.2021	0.429423	4.29423	37.7374	35.3581	8.58923	0.14991	-174.542	0.300233
50.699	19.865	1	1	3	0	0	0.431248	0.0377631	3.53763	8.59286	-0.181244	17.2057	0.431248	4.31248	37.7631	35.3763	8.59286	0.149974	-181.244	0.300296
50.709	19.875	1	1	3	0	0	0.433179	0.0375008	3.53956	8.58962	-0.161637	17.2025	0.433179	4.33179	37.5008	35.3956	8.58962	0.149917	-161.637	0.30024
50.72	19.886	1	1	3	0	0	0.434745	0.0374354	3.54113	8.59252	-0.180084	17.2054	0.434745	4.34745	37.4354	35.4113	8.59252	0.149968	-180.084	0.30029
50.73	19.896	1	1	3	0	0	0.436057	0.0374119	3.54244	8.58983	-0.148359	17.2027	0.436057	4.36057	37.4119	35.4244	8.58983	0.149921	-148.359	0.300243
50.741	19.907	1	1	3	0	0	0.437955	0.0372955	3.54434	8.5882	-0.160958	17.201	0.437955	4.37955	37.2955	35.4434	8.5882	0.149892	-160.958	0.300215
50.752	19.918	1	1	3	0	0	0.439675	0.0371538	3.54606	8.59053	-0.177105	17.2034	0.439675	4.39675	37.1538	35.4606	8.59053	0.149933	-177.105	0.300255
50.763	19.929	1	1	3	0	0	0.441085	0.0368798	3.54747	8.58982	-0.191662	17.2027	0.441085	4.41085	36.8798	35.4747	8.58982	0.149921	-191.662	0.300243
50.773	19.939	1	1	3	0	0	0.443198	0.0371583	3.54958	8.59128	-0.163106	17.2041	0.443198	4.43198	37.1583	35.4958	8.59128	0.149946	-163.106	0.300269
50.784	19.95	1	1	3	0	0	0.444951	0.0373455	3.55133	8.5909	-0.185583	17.2037	0.444951	4.44951	37.3455	35.5133	8.5909	0.14994	-185.583	0.300262
50.794	19.96	1	1	3	0	0	0.446155	0.036785	3.55254	8.58901	-0.159442	17.2018	0.446155	4.46155	36.785	35.5254	8.58901	0.149906	-159.442	0.300229
50.805	19.971	1	1	3	0	0	0.448215	0.0369569	3.5546	8.59125	-0.174048	17.2041	0.448215	4.48215	36.9569	35.546	8.59125	0.149946	-174.048	0.300268
50.816	19.982	1	1	3	0	0	0.45074	0.0373368	3.55712	8.58766	-0.180631	17.2005	0.45074	4.5074	37.3368	35.5712	8.58766	0.149883	-180.631	0.300205
50.827	19.993	1	1	3	0	0	0.453051	0.0370604	3.55943	8.59235	-0.182002	17.2052	0.453051	4.53051	37.0604	35.5943	8.59235	0.149965	-182.002	0.300287
50.837	20.003	1	1	3	0	0	0.4552	0.0369721	3.56158	8.5923	-0.181436	17.2051	0.4552	4.552	36.9721	35.6158	8.5923	0.149964	-181.436	0.300286
50.848	20.014	1	1	3	0	0	0.456111	0.0367496	3.56249	8.58926	-0.1771	17.2021	0.456111	4.56111	36.7496	35.6249	8.58926	0.149911	-177.1	0.300233
50.858	20.024	1	1	3	0	0	0.457292	0.0363282	3.56367	8.59025	-0.176731	17.2031	0.457292	4.57292	36.3282	35.6367	8.59025	0.149928	-176.731	0.300251
50.869	20.035	1	1	3	0	0	0.45925	0.0366451	3.56563	8.5935	-0.172306	17.2063	0.45925	4.5925	36.6451	35.6563	8.5935	0.149985	-172.306	0.300307
50.88	20.046	1	1	3	0	0	0.461746	0.0369596	3.56813	8.59031	-0.159581	17.2032	0.461746	4.61746	36.9596	35.6813	8.59031	0.149929	-159.581	0.300252
50.891	20.057	1	1	3	0	0	0.463936	0.0365334	3.57032	8.5935	-0.161657	17.2063	0.463936	4.63936	36.5334	35.7032	8.5935	0.149985	-161.657	0.300307
50.901	20.067	1	1	3	0	0	0.465203	0.0365193	3.57159	8.59151	-0.162266	17.2044	0.465203	4.65203	36.5193	35.7159	8.59151	0.14995	-162.266	0.300273
50.912	20.078	1	1	3	0	0	0.467089	0.0369059	3.57347	8.59019	-0.160791	17.203	0.467089	4.67089	36.9059	35.7347	8.59019	0.149927	-160.791	0.30025
50.922	20.088	1	1	3	0	0	0.469006	0.0363996	3.57539	8.59134	-0.173332	17.2042	0.469006	4.69006	36.3996	35.7539	8.59134	0.149947	-173.332	0.30027
50.933	20.099	1	1	3	0	0	0.471077	0.0366336	3.57746	8.59036	-0.178071	17.2032	0.471077	4.71077	36.6336	35.7746	8.59036	0.14993	-178.071	0.300253
50.944	20.11	1	1	3	0	0	0.472604	0.036612	3.57899	8.59167	-0.163782	17.2045	0.472604	4.72604	36.612	35.7899	8.59167	0.149953	-163.782	0.300275
50.955	20.121	1	1	3	0	0	0.47407	0.0359925	3.58045	8.59285	-0.165661	17.2057	0.47407	4.7407	35.9925	35.8045	8.59285	0.149974	-165.661	0.300296
50.965	20.131	1	1	3	0	0	0.475302	0.0361046	3.58168	8.59244	-0.161107	17.2053	0.475302	4.75302	36.1046	35.8168	8.59244	0.149966	-161.107	0.300289
50.976	20.142	1	1	3	0	0	0.477276	0.0364684	3.58366	8.59202	-0.161725	17.2049	0.477276	4.77276	36.4684	35.8366	8.59202	0.149959	-161.725	0.300281
50.986	20.152	1	1	3	0	0	0.479576	0.036156	3.58596	8.59291	-0.157672	17.2057	0.479576	4.79576	36.156	35.8596	8.59291	0.149975	-157.672	0.300297
50.997	20.163	1	1	3	0	0	0.48155	0.0363059	3.58793	8.59073	-0.158805	17.2036	0.48155	4.8155	36.3059	35.8793	8.59073	0.149937	-158.805	0.300259
51.008	20.174	1	1	3	0	0	0.483045	0.036414	3.58943	8.59323	-0.176432	17.2061	0.483045	4.83045	36.414	35.8943	8.59323	0.14998	-176.432	0.300303
51.019	20.185	1	1	3	0	0	0.4848	0.0358853	3.59118	8.59171	-0.170704	17.2045	0.4848	4.848	35.8853	35.9118	8.59171	0.149954	-170.704	0.300276
51.029	20.195	1	1	3	0	0	0.486785	0.0360678	3.59317	8.59461	-0.176232	17.2075	0.486785	4.86785	36.0678	35.9317	8.59461	0.150004	-176.232	0.300327
51.04	20.206	1	1	3	0	0	0.488689	0.0361296	3.59507	8.59064	-0.175119	17.2035	0.488689	4.88689	36.1296	35.9507	8.59064	0.149935	-175.119	0.300257
51.05	20.216	1	1	3	0	0	0.490117	0.0358415	3.5965	8.58756	-0.166254	17.2004	0.490117	4.90117	35.8415	35.965	8.58756	0.149881	-166.254	0.300204
51.061	20.227	1	1	3	0	0	0.491932	0.0359617	3.59831	8.59097	-0.170151	17.2038	0.491932	4.91932	35.9617	35.9831	8.59097	0.149941	-170.151	0.300263
51.072	20.238	1	1	3	0	0	0.493649	0.0358952	3.60003	8.58944	-0.166441	17.2023	0.493649	4.93649	35.8952	36.0003	8.58944	0.149914	-166.441	0.300236
51.083	20.249	1	1	3	0	0	0.495177	0.0356392	3.60156	8.59109	-0.178761	17.2039	0.495177	4.95177	35.6392	36.0156	8.59109	0.149943	-178.761	0.300265
51.093	20.259	1	1	3	0	0	0.496969	0.0360855	3.60335	8.58889	-0.159296	17.2017	0.496969	4.96969	36.0855	36.0335	8.58889	0.149904	-159.296	0.300227
51.104	20.27	1	1	3	0	0	0.498788	0.0354383	3.60517	8.593	-0.170719	17.2058	0.498788	4.98788	35.4383	36.0517	8.593	0.149976	-170.719	0.300298
51.114	20.28	1	1	3	0	0	0.500202	0.0358332	3.60658	8.59153	-0.150214	17.2044	0.500202	5.00202	35.8332	36.0658	8.59153	0.14995	-150.214	0.300273
51.125	20.291	1	1	3	0	0	0.501886	0.0357301	3.60827	8.59068	-0.159838	17.2035	0.501886	5.01886	35.7301	36.0827	8.59068	0.149936	-159.838	0.300258
51.136	20.302	1	1	3	0	0	0.503364	0.0354056	3.60975	8.59047	-0.162491	17.2033	0.503364	5.03364	35.4056	36.0975	8.59047	0.149932	-162.491	0.300254
51.147	20.313	1	1	3	0	0	0.505163	0.035914	3.61155	8.58887	-0.170274	17.2017	0.505163	5.05163	35.914	36.1155	8.58887	0.149904	-170.274	0.300226
51.157	20.323	1	1	3	0	0	0.507031	0.0360117	3.61341	8.59111	-0.16934	17.2039	0.507031	5.07031	36.0117	36.1341	8.59111	0.149943	-169.34	0.300266
51.168	20.334	1	1	3	0	0	0.508704	0.0355655	3.61509	8.59216	-0.164967	17.205	0.508704	5.08704	35.5655	36.1509	8.59216	0.149962	-164.967	0.300284
51.178	20.344	1	1	3	0	0	0.510967	0.0360343	3.61735	8.5888	-0.171475	17.2016	0.510967	5.10967	36.0343	36.1735	8.5888	0.149903	-171.475	0.300225
51.189	20.355	1	1	3	0	0	0.512379	0.0361458	3.61876	8.5915	-0.178955	17.2043	0.512379	5.12379	36.1458	36.1876	8.5915	0.14995	-178.955	0.300272
51.2	20.366	1	1	3	0	0	0.51399	0.0357398	3.62037	8.5919	-0.175341	17.2047	0.51399	5.1399	35.7398	36.2037	8.5919	0.149957	-175.341	0.300279
51.211	20.377	1	1	3	0	0	0.516255	0.036124	3.62264	8.59183	-0.167548	17.2047	0.516255	5.16255	36.124	36.2264	8.59183	0.149956	-167.548	0.300278
51.221	20.387	1	1	3	0	0	0.517867	0.0365504	3.62425	8.59333	-0.163588	17.2062	0.517867	5.17867	36.5504	36.2425	8.59333	0.149982	-163.588	0.300304
51.232	20.398	1	1	3	0	0	0.519766	0.0358484	3.62615	8.59285	-0.171896	17.2057	0.519766	5.19766	35.8484	36.2615	8.59285	0.149973	-171.896	0.300296
51.242	20.408	1	1	3	0	0	0.521422	0.0360628	3.6278	8.58918	-0.171355	17.202	0.521422	5.21422	36.0628	36.278	8.58918	0.14991	-171.355	0.300232
51.253	20.419	1	1	3	0	0	0.523638	0.0365741	3.63002	8.5915	-0.179106	17.2043	0.523638	5.23638	36.5741	36.3002	8.5915	0.14995	-179.106	0.300272
51.264	20.43	1	1	3	0	0	0.524801	0.0357825	3.63118	8.59241	-0.175438	17.2052	0.524801	5.24801	35.7825	36.3118	8.59241	0.149966	-175.438	0.300288
51.275	20.441	1	1	3	0	0	0.526275	0.0358881	3.63266	8.58884	-0.160719	17.2017	0.526275	5.26275	35.8881	36.3266	8.58884	0.149903	-160.719	0.300226
51.285	20.451	1	1	3	0	0	0.527986	0.0362737	3.63437	8.59055	-0.180702	17.2034	0.527986	5.27986	36.2737	36.3437	8.59055	0.149933	-180.702	0.300256
51.296	20.462	1	1	3	0	0	0.529833	0.0358667	3.63622	8.59343	-0.183062	17.2063	0.529833	5.29833	35.8667	36.3622	8.59343	0.149984	-183.062	0.300306
51.306	20.472	1	1	3	0	0	0.531229	0.0360682	3.63761	8.59367	-0.166515	17.2065	0.531229	5.31229	36.0682	36.3761	8.59367	0.149988	-166.515	0.30031
51.317	20.483	1	1	3	0	0	0.533344	0.0363731	3.63973	8.59212	-0.172641	17.205	0.533344	5.33344	36.3731	36.3973	8.59212	0.149961	-172.641	0.300283
51.328	20.494	1	1	3	0	0	0.535135	0.0361577	3.64152	8.59282	-0.170754	17.2057	0.535135	5.35135	36.1577	36.4152	8.59282	0.149973	-170.754	0.300295
51.339	20.505	1	1	3	0	0	0.536935	0.0362058	3.64332	8.59389	-0.167586	17.2067	0.536935	5.36935	36.2058	36.4332	8.59389	0.149992	-167.586	0.300314
51.349	20.515	1	1	3	0	0	0.53863	0.0361552	3.64501	8.59175	-0.175425	17.2046	0.53863	5.3863	36.1552	36.4501	8.59175	0.149954	-175.425	0.300277
51.36	20.526	1	1	3	0	0	0.540491	0.0359364	3.64687	8.5927	-0.169834	17.2055	0.540491	5.40491	35.9364	36.4687	8.5927	0.149971	-169.834	0.300293
51.37	20.536	1	1	3	0	0	0.542316	0.0362287	3.6487	8.59377	-0.174517	17.2066	0.542316	5.42316	36.2287	36.487	8.59377	0.14999	-174.517	0.300312
51.381	20.547	1	1	3	0	0	0.54401	0.0358979	3.65039	8.5901	-0.174989	17.2029	0.54401	5.4401	35.8979	36.5039	8.5901	0.149925	-174.989	0.300248
51.392	20.558	1	1	3	0	0	0.546097	0.0362607	3.65248	8.59193	-0.171489	17.2048	0.546097	5.46097	36.2607	36.5248	8.59193	0.149957	-171.489	0.30028
51.403	20.569	1	1	3	0	0	0.548349	0.0364341	3.65473	8.59308	-0.16314	17.2059	0.548349	5.48349	36.4341	36.5473	8.59308	0.149978	-163.14	0.3003
51.413	20.579	1	1	3	0	0	0.549419	0.0359073	3.6558	8.58862	-0.156919	17.2015	0.549419	5.49419	35.9073	36.558	8.58862	0.1499	-156.919	0.300222
51.424	20.59	1	1	3	0	0	0.550802	0.0358964	3.65718	8.59142	-0.152132	17.2043	0.550802	5.50802	35.8964	36.5718	8.59142	0.149949	-152.132	0.300271
51.434	20.6	1	1	3	0	0	0.55288	0.0363876	3.65926	8.59389	-0.171773	17.2067	0.55288	5.5288	36.3876	36.5926	8.59389	0.149992	-171.773	0.300314
51.445	20.611	1	1	3	0	0	0.554069	0.0355869	3.66045	8.59062	-0.164672	17.2035	0.554069	5.54069	35.5869	36.6045	8.59062	0.149935	-164.672	0.300257
51.456	20.622	1	1	3	0	0	0.555911	0.0359987	3.66229	8.59213	-0.163169	17.205	0.555911	5.55911	35.9987	36.6229	8.59213	0.149961	-163.169	0.300283
51.467	20.633	1	1	3	0	0	0.557809	0.0364027	3.66419	8.59348	-0.166497	17.2063	0.557809	5.57809	36.4027	36.6419	8.59348	0.149984	-166.497	0.300307
51.477	20.643	1	1	3	0	0	0.559984	0.036131	3.66637	8.58937	-0.162229	17.2022	0.559984	5.59984	36.131	36.6637	8.58937	0.149913	-162.229	0.300235
51.488	20.654	1	1	3	0	0	0.561804	0.0363917	3.66819	8.59033	-0.166815	17.2032	0.561804	5.61804	36.3917	36.6819	8.59033	0.14993	-166.815	0.300252
51.499	20.665	1	1	3	0	0	0.563204	0.0364877	3.66959	8.59315	-0.171555	17.206	0.563204	5.63204	36.4877	36.6959	8.59315	0.149979	-171.555	0.300301
51.51	20.676	1	1	3	0	0	0.565511	0.0361489	3.67189	8.59172	-0.172198	17.2046	0.565511	5.65511	36.1489	36.7189	8.59172	0.149954	-172.198	0.300276
51.52	20.686	1	1	3	0	0	0.56677	0.0363815	3.67315	8.59061	-0.165695	17.2034	0.56677	5.6677	36.3815	36.7315	8.59061	0.149934	-165.695	0.300257
[truncated: 6,432 more rows]

## Sheet: Data sheet 2
Gesamtzeit (s)	Verstrichene Zykluszeit (s)	Gesamtzyklen	Verstrichene Zyklen	Schritt	Gesamtzyklenzahl(E10BMTL8633 (Linear) Wellenform)	Gesamtzyklenzahl(E10BMTL8633 (Rotary) Wellenform)	Position des Aktuators(E10BMTL8633 (Linear):Position) (mm)	Last(E10BMTL8633 (Linear):Kraft) (kN)	Verschiebung(E10BMTL8633 (Linear):Digitale Position) (mm)	Umdrehung(E10BMTL8633 (Rotary):Umdrehung) (deg)	Drehmoment(E10BMTL8633 (Rotary):Drehmoment) (N·m)	Verschiebung (Rotation)(E10BMTL8633 (Rotary):Digitale Umdrehung) (deg)	Verschiebung(E10BMTL8633 (Linear):Position) (mm)	Dehnung(E10BMTL8633 (Linear):Position) (%)	Spannung(E10BMTL8633 (Linear):Kraft) (MPa)	Dehnung(E10BMTL8633 (Linear):Digitale Position) (%)	Verschiebung (Rotation)(E10BMTL8633 (Rotary):Umdrehung) (deg)	Scherdehnung(E10BMTL8633 (Rotary):Umdrehung) (rad)	Scherspannung(E10BMTL8633 (Rotary):Drehmoment) (MPa)	Scherdehnung(E10BMTL8633 (Rotary):Digitale Umdrehung) (rad)
0.001	0	1	1	1	0	0	-4.88781	0.00670683	5.49294e-05	8.84705	-0.182368	17.5398	-4.88781	-48.8781	6.70683	0.000549294	8.84705	0.15441	-182.368	0.306127
0.011	0.01	1	1	1	0	0	-4.8879	0.00676416	-4.01214e-05	8.84797	-0.17694	17.5407	-4.8879	-48.879	6.76416	-0.000401214	8.84797	0.154426	-176.94	0.306143
0.021	0.02	1	1	1	0	0	-4.88786	0.00651502	2.40281e-06	8.84705	-0.176971	17.5398	-4.88786	-48.8786	6.51502	2.40281e-05	8.84705	0.15441	-176.971	0.306127
0.032	0.031	1	1	1	0	0	-4.8878	0.00688606	6.04056e-05	8.84694	-0.17368	17.5397	-4.8878	-48.878	6.88606	0.000604056	8.84694	0.154408	-173.68	0.306125
0.042	0.041	1	1	1	0	0	-4.88778	0.00687763	8.71159e-05	8.8467	-0.185364	17.5395	-4.88778	-48.8778	6.87763	0.000871159	8.8467	0.154404	-185.364	0.306121
0.043	0.042	1	1	1	0	0	-4.88777	0.00685847	9.47714e-05	8.84678	-0.167711	17.5395	-4.88777	-48.8777	6.85847	0.000947714	8.84678	0.154406	-167.711	0.306123
0.045	0.044	1	1	1	0	0	-4.88771	0.00704362	0.000152383	8.84715	-0.196619	17.5399	-4.88771	-48.8771	7.04362	0.00152383	8.84715	0.154412	-196.619	0.306129
0.055	0.054	1	1	1	0	0	-4.8876	0.00661092	0.000257939	8.84746	-0.185503	17.5402	-4.8876	-48.876	6.61092	0.00257939	8.84746	0.154417	-185.503	0.306134
0.06	0.059	1	1	1	0	0	-4.88741	0.00687501	0.00045279	8.8467	-0.175688	17.5394	-4.88741	-48.8741	6.87501	0.0045279	8.8467	0.154404	-175.688	0.306121
0.07	0.069	1	1	1	0	0	-4.88697	0.00729495	0.000893399	8.84686	-0.19424	17.5396	-4.88697	-48.8697	7.29495	0.00893399	8.84686	0.154407	-194.24	0.306124
0.081	0.08	1	1	1	0	0	-4.88621	0.00777731	0.0016552	8.84705	-0.183992	17.5398	-4.88621	-48.8621	7.77731	0.016552	8.84705	0.15441	-183.992	0.306127
0.092	0.091	1	1	1	0	0	-4.88516	0.00786153	0.00270344	8.8467	-0.177138	17.5395	-4.88516	-48.8516	7.86153	0.0270344	8.8467	0.154404	-177.138	0.306121
0.102	0.101	1	1	1	0	0	-4.88412	0.00846476	0.00374492	8.84705	-0.192232	17.5398	-4.88412	-48.8412	8.46476	0.0374492	8.84705	0.15441	-192.232	0.306127
0.112	0.111	1	1	1	0	0	-4.88273	0.00901087	0.00512905	8.84705	-0.190316	17.5398	-4.88273	-48.8273	9.01087	0.0512905	8.84705	0.15441	-190.316	0.306127
0.123	0.122	1	1	1	0	0	-4.88091	0.00858131	0.00695687	8.84935	-0.186771	17.5421	-4.88091	-48.8091	8.58131	0.0695687	8.84935	0.15445	-186.771	0.306168
0.133	0.132	1	1	1	0	0	-4.87877	0.0087932	0.00909381	8.84692	-0.182966	17.5397	-4.87877	-48.7877	8.7932	0.0909381	8.84692	0.154408	-182.966	0.306125
0.143	0.142	1	1	1	0	0	-4.87772	0.00902814	0.0101421	8.84705	-0.189948	17.5398	-4.87772	-48.7772	9.02814	0.101421	8.84705	0.15441	-189.948	0.306127
0.154	0.153	1	1	1	0	0	-4.87663	0.00873487	0.0112283	8.84705	-0.187248	17.5398	-4.87663	-48.7663	8.73487	0.112283	8.84705	0.15441	-187.248	0.306127
0.164	0.163	1	1	1	0	0	-4.87548	0.00910302	0.0123796	8.84807	-0.186982	17.5408	-4.87548	-48.7548	9.10302	0.123796	8.84807	0.154428	-186.982	0.306145
0.174	0.173	1	1	1	0	0	-4.87412	0.00928423	0.0137463	8.84704	-0.177032	17.5398	-4.87412	-48.7412	9.28423	0.137463	8.84704	0.15441	-177.032	0.306127
0.185	0.184	1	1	1	0	0	-4.87283	0.00918477	0.0150353	8.84705	-0.184287	17.5398	-4.87283	-48.7283	9.18477	0.150353	8.84705	0.15441	-184.287	0.306127
0.195	0.194	1	1	1	0	0	-4.87232	0.00893123	0.0155401	8.84706	-0.179046	17.5398	-4.87232	-48.7232	8.93123	0.155401	8.84706	0.15441	-179.046	0.306127
0.205	0.204	1	1	1	0	0	-4.87151	0.00953236	0.0163474	8.84704	-0.181666	17.5398	-4.87151	-48.7151	9.53236	0.163474	8.84704	0.15441	-181.666	0.306127
0.216	0.215	1	1	1	0	0	-4.87057	0.00894398	0.0172967	8.84705	-0.180836	17.5398	-4.87057	-48.7057	8.94398	0.172967	8.84705	0.15441	-180.836	0.306127
0.226	0.225	1	1	1	0	0	-4.86983	0.00933234	0.0180317	8.84706	-0.180248	17.5398	-4.86983	-48.6983	9.33234	0.180317	8.84706	0.15441	-180.248	0.306127
0.23	0.229	1	1	1	0	0	-4.86944	0.00955979	0.0184213	8.84703	-0.185834	17.5398	-4.86944	-48.6944	9.55979	0.184213	8.84703	0.15441	-185.834	0.306127
0.241	0.24	1	1	1	0	0	-4.86888	0.00952329	0.0189779	8.84705	-0.183207	17.5398	-4.86888	-48.6888	9.52329	0.189779	8.84705	0.15441	-183.207	0.306127
0.251	0.25	1	1	1	0	0	-4.86843	0.00931316	0.0194347	8.84706	-0.184206	17.5398	-4.86843	-48.6843	9.31316	0.194347	8.84706	0.15441	-184.206	0.306127
0.257	0.256	1	1	2	0	0	-4.86804	0.00934756	0.0198216	8.84705	-0.18152	17.5398	-4.86804	-48.6804	9.34756	0.198216	8.84705	0.15441	-181.52	0.306127
30.39	0	1	1	3	0	0	-4.83246	0.00990783	0.0554018	8.84731	-0.188811	17.5401	-4.83246	-48.3246	9.90783	0.554018	8.84731	0.154415	-188.811	0.306132
30.4	0.01	1	1	3	0	0	-4.8324	0.0102606	0.0554659	8.85021	-0.188216	17.543	-4.8324	-48.324	10.2606	0.554659	8.85021	0.154465	-188.216	0.306183
30.411	0.021	1	1	3	0	0	-4.83238	0.00966995	0.0554818	8.85051	-0.18504	17.5433	-4.83238	-48.3238	9.66995	0.554818	8.85051	0.15447	-185.04	0.306188
30.428	0.038	1	1	3	0	0	-4.83212	0.0103246	0.0557394	8.85271	-0.182834	17.5455	-4.83212	-48.3212	10.3246	0.557394	8.85271	0.154509	-182.834	0.306226
30.46	0.07	1	1	3	0	0	-4.83058	0.0104703	0.0572806	8.84707	-0.185456	17.5398	-4.83058	-48.3058	10.4703	0.572806	8.84707	0.15441	-185.456	0.306128
30.471	0.081	1	1	3	0	0	-4.82963	0.0105276	0.0582303	8.84953	-0.180717	17.5423	-4.82963	-48.2963	10.5276	0.582303	8.84953	0.154453	-180.717	0.306171
30.481	0.091	1	1	3	0	0	-4.82859	0.0103351	0.0592766	8.8493	-0.175885	17.5421	-4.82859	-48.2859	10.3351	0.592766	8.8493	0.15445	-175.885	0.306167
30.496	0.106	1	1	3	0	0	-4.82612	0.0107678	0.061738	8.84803	-0.171138	17.5408	-4.82612	-48.2612	10.7678	0.61738	8.84803	0.154427	-171.138	0.306145
30.507	0.117	1	1	3	0	0	-4.82423	0.0105651	0.0636345	8.84724	-0.175916	17.54	-4.82423	-48.2423	10.5651	0.636345	8.84724	0.154414	-175.916	0.306131
30.521	0.131	1	1	3	0	0	-4.8213	0.0108367	0.0665621	8.849	-0.166625	17.5418	-4.8213	-48.213	10.8367	0.665621	8.849	0.154444	-166.625	0.306161
30.531	0.141	1	1	3	0	0	-4.81818	0.0113371	0.0696852	8.84733	-0.183702	17.5401	-4.81818	-48.1818	11.3371	0.696852	8.84733	0.154415	-183.702	0.306132
30.542	0.152	1	1	3	0	0	-4.8157	0.0107678	0.0721667	8.84764	-0.17815	17.5404	-4.8157	-48.157	10.7678	0.721667	8.84764	0.15442	-178.15	0.306138
30.553	0.163	1	1	3	0	0	-4.81355	0.0111107	0.0743087	8.84792	-0.177904	17.5407	-4.81355	-48.1355	11.1107	0.743087	8.84792	0.154425	-177.904	0.306142
30.563	0.173	1	1	3	0	0	-4.81149	0.0111204	0.0763761	8.84952	-0.179958	17.5423	-4.81149	-48.1149	11.1204	0.763761	8.84952	0.154453	-179.958	0.30617
30.574	0.184	1	1	3	0	0	-4.80873	0.010906	0.0791303	8.84855	-0.177361	17.5413	-4.80873	-48.0873	10.906	0.791303	8.84855	0.154436	-177.361	0.306154
30.585	0.195	1	1	3	0	0	-4.80709	0.0110716	0.0807761	8.84689	-0.18462	17.5396	-4.80709	-48.0709	11.0716	0.807761	8.84689	0.154407	-184.62	0.306124
30.596	0.206	1	1	3	0	0	-4.80515	0.0112674	0.0827113	8.84694	-0.182242	17.5397	-4.80515	-48.0515	11.2674	0.827113	8.84694	0.154408	-182.242	0.306125
30.606	0.216	1	1	3	0	0	-4.80316	0.0110332	0.0846995	8.84804	-0.179416	17.5408	-4.80316	-48.0316	11.0332	0.846995	8.84804	0.154428	-179.416	0.306145
30.617	0.227	1	1	3	0	0	-4.80057	0.011264	0.0872918	8.84935	-0.181678	17.5421	-4.80057	-48.0057	11.264	0.872918	8.84935	0.15445	-181.678	0.306168
30.628	0.238	1	1	3	0	0	-4.79803	0.011439	0.0898342	8.84774	-0.188292	17.5405	-4.79803	-47.9803	11.439	0.898342	8.84774	0.154422	-188.292	0.306139
30.638	0.248	1	1	3	0	0	-4.7962	0.0112823	0.0916654	8.85028	-0.184589	17.543	-4.7962	-47.962	11.2823	0.916654	8.85028	0.154466	-184.589	0.306184
30.652	0.262	1	1	3	0	0	-4.79361	0.011762	0.0942509	8.84873	-0.180895	17.5415	-4.79361	-47.9361	11.762	0.942509	8.84873	0.154439	-180.895	0.306157
30.663	0.273	1	1	3	0	0	-4.79194	0.0114685	0.0959176	8.84841	-0.184806	17.5412	-4.79194	-47.9194	11.4685	0.959176	8.84841	0.154434	-184.806	0.306151
30.673	0.283	1	1	3	0	0	-4.7902	0.0115021	0.0976653	8.84709	-0.192669	17.5398	-4.7902	-47.902	11.5021	0.976653	8.84709	0.154411	-192.669	0.306128
30.684	0.294	1	1	3	0	0	-4.7884	0.0117119	0.0994584	8.84656	-0.184842	17.5393	-4.7884	-47.884	11.7119	0.994584	8.84656	0.154402	-184.842	0.306119
30.701	0.311	1	1	3	0	0	-4.78541	0.0116172	0.102455	8.84713	-0.191999	17.5399	-4.78541	-47.8541	11.6172	1.02455	8.84713	0.154411	-191.999	0.306129
30.711	0.321	1	1	3	0	0	-4.78388	0.0117148	0.103979	8.84761	-0.189512	17.5404	-4.78388	-47.8388	11.7148	1.03979	8.84761	0.15442	-189.512	0.306137
30.722	0.332	1	1	3	0	0	-4.78222	0.0117628	0.105639	8.84951	-0.195366	17.5423	-4.78222	-47.8222	11.7628	1.05639	8.84951	0.154453	-195.366	0.30617
30.733	0.343	1	1	3	0	0	-4.77994	0.0117561	0.107925	8.84696	-0.188122	17.5397	-4.77994	-47.7994	11.7561	1.07925	8.84696	0.154409	-188.122	0.306126
30.743	0.353	1	1	3	0	0	-4.77846	0.0119325	0.109401	8.84811	-0.187822	17.5409	-4.77846	-47.7846	11.9325	1.09401	8.84811	0.154429	-187.822	0.306146
30.754	0.364	1	1	3	0	0	-4.77644	0.0122478	0.111421	8.84807	-0.189072	17.5408	-4.77644	-47.7644	12.2478	1.11421	8.84807	0.154428	-189.072	0.306145
30.765	0.375	1	1	3	0	0	-4.77447	0.0118513	0.113391	8.84706	-0.198608	17.5398	-4.77447	-47.7447	11.8513	1.13391	8.84706	0.15441	-198.608	0.306127
30.775	0.385	1	1	3	0	0	-4.77256	0.0121307	0.115307	8.84854	-0.180854	17.5413	-4.77256	-47.7256	12.1307	1.15307	8.84854	0.154436	-180.854	0.306153
30.786	0.396	1	1	3	0	0	-4.77104	0.0125441	0.116824	8.84709	-0.193859	17.5398	-4.77104	-47.7104	12.5441	1.16824	8.84709	0.154411	-193.859	0.306128
30.797	0.407	1	1	3	0	0	-4.76906	0.0120476	0.118804	8.84852	-0.198007	17.5413	-4.76906	-47.6906	12.0476	1.18804	8.84852	0.154436	-198.007	0.306153
30.807	0.417	1	1	3	0	0	-4.76737	0.01227	0.120495	8.849	-0.1859	17.5418	-4.76737	-47.6737	12.27	1.20495	8.849	0.154444	-185.9	0.306161
30.818	0.428	1	1	3	0	0	-4.76569	0.0124781	0.122174	8.84723	-0.189786	17.54	-4.76569	-47.6569	12.4781	1.22174	8.84723	0.154413	-189.786	0.30613
30.829	0.439	1	1	3	0	0	-4.76378	0.0122172	0.124087	8.84814	-0.193058	17.5409	-4.76378	-47.6378	12.2172	1.24087	8.84814	0.154429	-193.058	0.306146
30.839	0.449	1	1	3	0	0	-4.76243	0.0123912	0.125437	8.84723	-0.194557	17.54	-4.76243	-47.6243	12.3912	1.25437	8.84723	0.154413	-194.557	0.30613
30.85	0.46	1	1	3	0	0	-4.7603	0.0125663	0.127566	8.84794	-0.193578	17.5407	-4.7603	-47.603	12.5663	1.27566	8.84794	0.154426	-193.578	0.306143
30.861	0.471	1	1	3	0	0	-4.75846	0.0122004	0.129404	8.84919	-0.192806	17.5419	-4.75846	-47.5846	12.2004	1.29404	8.84919	0.154448	-192.806	0.306165
30.871	0.481	1	1	3	0	0	-4.7567	0.0124888	0.131166	8.84724	-0.183167	17.54	-4.7567	-47.567	12.4888	1.31166	8.84724	0.154413	-183.167	0.306131
30.882	0.492	1	1	3	0	0	-4.75536	0.0125797	0.132504	8.8488	-0.185191	17.5416	-4.75536	-47.5536	12.5797	1.32504	8.8488	0.154441	-185.191	0.306158
30.893	0.503	1	1	3	0	0	-4.75289	0.0124709	0.134973	8.8471	-0.19229	17.5399	-4.75289	-47.5289	12.4709	1.34973	8.8471	0.154411	-192.29	0.306128
30.903	0.513	1	1	3	0	0	-4.75148	0.0126273	0.136384	8.84708	-0.186148	17.5398	-4.75148	-47.5148	12.6273	1.36384	8.84708	0.154411	-186.148	0.306128
30.914	0.524	1	1	3	0	0	-4.75001	0.0128563	0.137851	8.84852	-0.181109	17.5413	-4.75001	-47.5001	12.8563	1.37851	8.84852	0.154436	-181.109	0.306153
30.928	0.538	1	1	3	0	0	-4.74716	0.0126189	0.140699	8.84785	-0.176844	17.5406	-4.74716	-47.4716	12.6189	1.40699	8.84785	0.154424	-176.844	0.306141
30.938	0.548	1	1	3	0	0	-4.74548	0.0128069	0.142378	8.85025	-0.192315	17.543	-4.74548	-47.4548	12.8069	1.42378	8.85025	0.154466	-192.315	0.306183
30.949	0.559	1	1	3	0	0	-4.74426	0.0127395	0.143603	8.84665	-0.18658	17.5394	-4.74426	-47.4426	12.7395	1.43603	8.84665	0.154403	-186.58	0.30612
30.96	0.57	1	1	3	0	0	-4.7426	0.0126259	0.145261	8.8471	-0.185904	17.5399	-4.7426	-47.426	12.6259	1.45261	8.8471	0.154411	-185.904	0.306128
30.97	0.58	1	1	3	0	0	-4.74127	0.0130216	0.146589	8.85042	-0.183373	17.5432	-4.74127	-47.4127	13.0216	1.46589	8.85042	0.154469	-183.373	0.306186
30.981	0.591	1	1	3	0	0	-4.73983	0.0128126	0.14803	8.84707	-0.179004	17.5398	-4.73983	-47.3983	12.8126	1.4803	8.84707	0.15441	-179.004	0.306128
30.992	0.602	1	1	3	0	0	-4.73696	0.0128094	0.150907	8.85114	-0.190299	17.5439	-4.73696	-47.3696	12.8094	1.50907	8.85114	0.154482	-190.299	0.306199
31.007	0.617	1	1	3	0	0	-4.73432	0.0132352	0.153541	8.84763	-0.17689	17.5404	-4.73432	-47.3432	13.2352	1.53541	8.84763	0.15442	-176.89	0.306137
31.018	0.628	1	1	3	0	0	-4.73261	0.0128053	0.155255	8.84753	-0.18172	17.5403	-4.73261	-47.3261	12.8053	1.55255	8.84753	0.154419	-181.72	0.306136
31.028	0.638	1	1	3	0	0	-4.73084	0.0132742	0.157021	8.84718	-0.183172	17.5399	-4.73084	-47.3084	13.2742	1.57021	8.84718	0.154412	-183.172	0.30613
31.039	0.649	1	1	3	0	0	-4.72857	0.013278	0.159296	8.84957	-0.192297	17.5423	-4.72857	-47.2857	13.278	1.59296	8.84957	0.154454	-192.297	0.306171
31.05	0.66	1	1	3	0	0	-4.72743	0.0128769	0.160431	8.84868	-0.188391	17.5414	-4.72743	-47.2743	12.8769	1.60431	8.84868	0.154439	-188.391	0.306156
31.06	0.67	1	1	3	0	0	-4.72606	0.0131774	0.161802	8.84968	-0.192055	17.5424	-4.72606	-47.2606	13.1774	1.61802	8.84968	0.154456	-192.055	0.306173
31.071	0.681	1	1	3	0	0	-4.72387	0.0135607	0.163994	8.84794	-0.189148	17.5407	-4.72387	-47.2387	13.5607	1.63994	8.84794	0.154426	-189.148	0.306143
31.082	0.692	1	1	3	0	0	-4.72173	0.0132246	0.166133	8.84804	-0.199299	17.5408	-4.72173	-47.2173	13.2246	1.66133	8.84804	0.154428	-199.299	0.306145
31.092	0.702	1	1	3	0	0	-4.72041	0.0133139	0.167449	8.84775	-0.182678	17.5405	-4.72041	-47.2041	13.3139	1.67449	8.84775	0.154422	-182.678	0.30614
31.103	0.713	1	1	3	0	0	-4.71861	0.0137225	0.169252	8.84755	-0.187017	17.5403	-4.71861	-47.1861	13.7225	1.69252	8.84755	0.154419	-187.017	0.306136
31.114	0.724	1	1	3	0	0	-4.71646	0.0134114	0.171402	8.84698	-0.195448	17.5397	-4.71646	-47.1646	13.4114	1.71402	8.84698	0.154409	-195.448	0.306126
31.124	0.734	1	1	3	0	0	-4.71536	0.0133398	0.172502	8.8484	-0.1907	17.5412	-4.71536	-47.1536	13.3398	1.72502	8.8484	0.154434	-190.7	0.306151
31.135	0.745	1	1	3	0	0	-4.71318	0.0137665	0.174687	8.84784	-0.189356	17.5406	-4.71318	-47.1318	13.7665	1.74687	8.84784	0.154424	-189.356	0.306141
31.146	0.756	1	1	3	0	0	-4.71133	0.0133595	0.176527	8.84788	-0.189757	17.5406	-4.71133	-47.1133	13.3595	1.76527	8.84788	0.154425	-189.757	0.306142
31.161	0.771	1	1	3	0	0	-4.70908	0.0137326	0.178786	8.84701	-0.189116	17.5398	-4.70908	-47.0908	13.7326	1.78786	8.84701	0.15441	-189.116	0.306127
31.172	0.782	1	1	3	0	0	-4.70637	0.0137168	0.181495	8.84836	-0.184151	17.5411	-4.70637	-47.0637	13.7168	1.81495	8.84836	0.154433	-184.151	0.30615
31.182	0.792	1	1	3	0	0	-4.70532	0.0135447	0.182542	8.8475	-0.18781	17.5403	-4.70532	-47.0532	13.5447	1.82542	8.8475	0.154418	-187.81	0.306135
31.193	0.803	1	1	3	0	0	-4.70371	0.0138397	0.184148	8.8482	-0.186657	17.5409	-4.70371	-47.0371	13.8397	1.84148	8.8482	0.15443	-186.657	0.306147
31.204	0.814	1	1	3	0	0	-4.70149	0.0137337	0.186377	8.84787	-0.187655	17.5406	-4.70149	-47.0149	13.7337	1.86377	8.84787	0.154425	-187.655	0.306142
31.214	0.824	1	1	3	0	0	-4.69955	0.0137852	0.188313	8.84726	-0.189488	17.54	-4.69955	-46.9955	13.7852	1.88313	8.84726	0.154414	-189.488	0.306131
31.225	0.835	1	1	3	0	0	-4.69793	0.0137781	0.189934	8.84689	-0.19215	17.5396	-4.69793	-46.9793	13.7781	1.89934	8.84689	0.154407	-192.15	0.306124
31.236	0.846	1	1	3	0	0	-4.69641	0.0138821	0.191456	8.84753	-0.19318	17.5403	-4.69641	-46.9641	13.8821	1.91456	8.84753	0.154419	-193.18	0.306136
31.246	0.856	1	1	3	0	0	-4.69473	0.0137968	0.193132	8.84814	-0.181989	17.5409	-4.69473	-46.9473	13.7968	1.93132	8.84814	0.154429	-181.989	0.306146
31.257	0.867	1	1	3	0	0	-4.69213	0.0141625	0.195731	8.85311	-0.185452	17.5459	-4.69213	-46.9213	14.1625	1.95731	8.85311	0.154516	-185.452	0.306233
31.268	0.878	1	1	3	0	0	-4.69058	0.0141379	0.197284	8.84699	-0.183112	17.5397	-4.69058	-46.9058	14.1379	1.97284	8.84699	0.154409	-183.112	0.306126
31.278	0.888	1	1	3	0	0	-4.68894	0.0139692	0.198925	8.85079	-0.183125	17.5435	-4.68894	-46.8894	13.9692	1.98925	8.85079	0.154475	-183.125	0.306192
31.289	0.899	1	1	3	0	0	-4.68678	0.0140263	0.201082	8.84808	-0.18258	17.5408	-4.68678	-46.8678	14.0263	2.01082	8.84808	0.154428	-182.58	0.306145
31.3	0.91	1	1	3	0	0	-4.6847	0.0142164	0.203161	8.85038	-0.188047	17.5431	-4.6847	-46.847	14.2164	2.03161	8.85038	0.154468	-188.047	0.306186
31.31	0.92	1	1	3	0	0	-4.68326	0.0140239	0.2046	8.84892	-0.190452	17.5417	-4.68326	-46.8326	14.0239	2.046	8.84892	0.154443	-190.452	0.30616
31.321	0.931	1	1	3	0	0	-4.68166	0.014085	0.2062	8.84902	-0.199685	17.5418	-4.68166	-46.8166	14.085	2.062	8.84902	0.154444	-199.685	0.306162
31.332	0.942	1	1	3	0	0	-4.67965	0.0141875	0.20821	8.84769	-0.194597	17.5404	-4.67965	-46.7965	14.1875	2.0821	8.84769	0.154421	-194.597	0.306139
31.342	0.952	1	1	3	0	0	-4.67805	0.014091	0.20981	8.84739	-0.196368	17.5401	-4.67805	-46.7805	14.091	2.0981	8.84739	0.154416	-196.368	0.306133
31.353	0.963	1	1	3	0	0	-4.67621	0.0144824	0.211648	8.84781	-0.201149	17.5406	-4.67621	-46.7621	14.4824	2.11648	8.84781	0.154423	-201.149	0.306141
31.364	0.974	1	1	3	0	0	-4.67414	0.0144638	0.213718	8.84638	-0.19294	17.5391	-4.67414	-46.7414	14.4638	2.13718	8.84638	0.154398	-192.94	0.306116
31.374	0.984	1	1	3	0	0	-4.67215	0.0143246	0.215711	8.84887	-0.202732	17.5416	-4.67215	-46.7215	14.3246	2.15711	8.84887	0.154442	-202.732	0.306159
31.385	0.995	1	1	3	0	0	-4.67042	0.014425	0.217439	8.85023	-0.200241	17.543	-4.67042	-46.7042	14.425	2.17439	8.85023	0.154466	-200.241	0.306183
31.396	1.006	1	1	3	0	0	-4.66901	0.0143596	0.218853	8.84795	-0.178565	17.5407	-4.66901	-46.6901	14.3596	2.18853	8.84795	0.154426	-178.565	0.306143
31.406	1.016	1	1	3	0	0	-4.66748	0.0142019	0.220383	8.84915	-0.198964	17.5419	-4.66748	-46.6748	14.2019	2.20383	8.84915	0.154447	-198.964	0.306164
31.417	1.027	1	1	3	0	0	-4.665	0.0147258	0.222858	8.8494	-0.193448	17.5422	-4.665	-46.65	14.7258	2.22858	8.8494	0.154451	-193.448	0.306168
31.431	1.041	1	1	3	0	0	-4.66256	0.0142404	0.225306	8.84725	-0.205023	17.54	-4.66256	-46.6256	14.2404	2.25306	8.84725	0.154414	-205.023	0.306131
31.442	1.052	1	1	3	0	0	-4.66135	0.014306	0.226512	8.84811	-0.197026	17.5409	-4.66135	-46.6135	14.306	2.26512	8.84811	0.154429	-197.026	0.306146
31.452	1.062	1	1	3	0	0	-4.65905	0.0146625	0.228816	8.84777	-0.20182	17.5405	-4.65905	-46.5905	14.6625	2.28816	8.84777	0.154423	-201.82	0.30614
31.463	1.073	1	1	3	0	0	-4.6576	0.0142758	0.230258	8.8474	-0.195462	17.5402	-4.6576	-46.576	14.2758	2.30258	8.8474	0.154416	-195.462	0.306133
31.474	1.084	1	1	3	0	0	-4.65574	0.014743	0.232127	8.84972	-0.198312	17.5425	-4.65574	-46.5574	14.743	2.32127	8.84972	0.154457	-198.312	0.306174
31.484	1.094	1	1	3	0	0	-4.65387	0.0145775	0.233995	8.8489	-0.186399	17.5417	-4.65387	-46.5387	14.5775	2.33995	8.8489	0.154442	-186.399	0.30616
31.495	1.105	1	1	3	0	0	-4.65175	0.0147467	0.236113	8.84878	-0.194004	17.5415	-4.65175	-46.5175	14.7467	2.36113	8.84878	0.15444	-194.004	0.306158
31.506	1.116	1	1	3	0	0	-4.65068	0.0148372	0.237187	8.85133	-0.196226	17.5441	-4.65068	-46.5068	14.8372	2.37187	8.85133	0.154485	-196.226	0.306202
31.516	1.126	1	1	3	0	0	-4.64839	0.0149885	0.239476	8.84712	-0.184161	17.5399	-4.64839	-46.4839	14.9885	2.39476	8.84712	0.154411	-184.161	0.306128
31.527	1.137	1	1	3	0	0	-4.6466	0.0148223	0.241267	8.84744	-0.191885	17.5402	-4.6466	-46.466	14.8223	2.41267	8.84744	0.154417	-191.885	0.306134
31.538	1.148	1	1	3	0	0	-4.64478	0.0151125	0.243087	8.84762	-0.19226	17.5404	-4.64478	-46.4478	15.1125	2.43087	8.84762	0.15442	-192.26	0.306137
31.548	1.158	1	1	3	0	0	-4.64324	0.0151968	0.244626	8.84756	-0.193745	17.5403	-4.64324	-46.4324	15.1968	2.44626	8.84756	0.154419	-193.745	0.306136
31.559	1.169	1	1	3	0	0	-4.64096	0.014958	0.246906	8.84908	-0.198674	17.5418	-4.64096	-46.4096	14.958	2.46906	8.84908	0.154446	-198.674	0.306163
31.57	1.18	1	1	3	0	0	-4.6393	0.0149648	0.248561	8.84819	-0.198241	17.5409	-4.6393	-46.393	14.9648	2.48561	8.84819	0.15443	-198.241	0.306147
31.58	1.19	1	1	3	0	0	-4.63787	0.0152509	0.249993	8.84643	-0.171409	17.5392	-4.63787	-46.3787	15.2509	2.49993	8.84643	0.154399	-171.409	0.306117
31.591	1.201	1	1	3	0	0	-4.63586	0.014851	0.252003	8.8514	-0.186824	17.5442	-4.63586	-46.3586	14.851	2.52003	8.8514	0.154486	-186.824	0.306203
31.602	1.212	1	1	3	0	0	-4.63394	0.0154401	0.253922	8.84815	-0.188257	17.5409	-4.63394	-46.3394	15.4401	2.53922	8.84815	0.154429	-188.257	0.306146
31.612	1.222	1	1	3	0	0	-4.63247	0.0155037	0.255396	8.84911	-0.18992	17.5419	-4.63247	-46.3247	15.5037	2.55396	8.84911	0.154446	-189.92	0.306163
31.623	1.233	1	1	3	0	0	-4.63018	0.0151956	0.257687	8.84741	-0.180813	17.5402	-4.63018	-46.3018	15.1956	2.57687	8.84741	0.154416	-180.813	0.306133
31.634	1.244	1	1	3	0	0	-4.62796	0.0153023	0.259899	8.84951	-0.179953	17.5423	-4.62796	-46.2796	15.3023	2.59899	8.84951	0.154453	-179.953	0.30617
31.644	1.254	1	1	3	0	0	-4.62639	0.0155069	0.261475	8.85008	-0.190517	17.5428	-4.62639	-46.2639	15.5069	2.61475	8.85008	0.154463	-190.517	0.30618
31.655	1.265	1	1	3	0	0	-4.62438	0.0152181	0.263479	8.8479	-0.183381	17.5407	-4.62438	-46.2438	15.2181	2.63479	8.8479	0.154425	-183.381	0.306142
31.666	1.276	1	1	3	0	0	-4.62332	0.0152971	0.264546	8.84702	-0.184071	17.5398	-4.62332	-46.2332	15.2971	2.64546	8.84702	0.15441	-184.071	0.306127
31.684	1.294	1	1	3	0	0	-4.61946	0.0153331	0.268407	8.84716	-0.186171	17.5399	-4.61946	-46.1946	15.3331	2.68407	8.84716	0.154412	-186.171	0.306129
31.695	1.305	1	1	3	0	0	-4.61732	0.0154917	0.27054	8.85112	-0.190905	17.5439	-4.61732	-46.1732	15.4917	2.7054	8.85112	0.154481	-190.905	0.306198
31.705	1.315	1	1	3	0	0	-4.61609	0.0154746	0.271777	8.84747	-0.188405	17.5402	-4.61609	-46.1609	15.4746	2.71777	8.84747	0.154417	-188.405	0.306135
31.716	1.326	1	1	3	0	0	-4.61398	0.0153308	0.273882	8.85244	-0.184465	17.5452	-4.61398	-46.1398	15.3308	2.73882	8.85244	0.154504	-184.465	0.306221
31.727	1.337	1	1	3	0	0	-4.61218	0.0153708	0.27568	8.84735	-0.188086	17.5401	-4.61218	-46.1218	15.3708	2.7568	8.84735	0.154415	-188.086	0.306133
31.737	1.347	1	1	3	0	0	-4.61006	0.0157209	0.277804	8.84657	-0.185401	17.5393	-4.61006	-46.1006	15.7209	2.77804	8.84657	0.154402	-185.401	0.306119
31.748	1.358	1	1	3	0	0	-4.60807	0.0152822	0.279787	8.84777	-0.191408	17.5405	-4.60807	-46.0807	15.2822	2.79787	8.84777	0.154423	-191.408	0.30614
31.759	1.369	1	1	3	0	0	-4.60622	0.0156553	0.28164	8.84829	-0.195723	17.541	-4.60622	-46.0622	15.6553	2.8164	8.84829	0.154432	-195.723	0.306149
31.769	1.379	1	1	3	0	0	-4.60413	0.0157464	0.283733	8.84856	-0.194806	17.5413	-4.60413	-46.0413	15.7464	2.83733	8.84856	0.154436	-194.806	0.306154
31.78	1.39	1	1	3	0	0	-4.60143	0.0152265	0.286436	8.84705	-0.198061	17.5398	-4.60143	-46.0143	15.2265	2.86436	8.84705	0.15441	-198.061	0.306127
31.791	1.401	1	1	3	0	0	-4.59953	0.0156176	0.288331	8.84782	-0.202008	17.5406	-4.59953	-45.9953	15.6176	2.88331	8.84782	0.154424	-202.008	0.306141
31.804	1.414	1	1	3	0	0	-4.59775	0.0159605	0.290111	8.84787	-0.198843	17.5406	-4.59775	-45.9775	15.9605	2.90111	8.84787	0.154425	-198.843	0.306142
31.818	1.428	1	1	3	0	0	-4.59517	0.0154555	0.292693	8.84685	-0.193133	17.5396	-4.59517	-45.9517	15.4555	2.92693	8.84685	0.154407	-193.133	0.306124
31.829	1.439	1	1	3	0	0	-4.59412	0.0157681	0.293743	8.85256	-0.198199	17.5453	-4.59412	-45.9412	15.7681	2.93743	8.85256	0.154506	-198.199	0.306224
31.839	1.449	1	1	3	0	0	-4.59268	0.0157909	0.295181	8.85046	-0.18011	17.5432	-4.59268	-45.9268	15.7909	2.95181	8.85046	0.15447	-180.11	0.306187
31.85	1.46	1	1	3	0	0	-4.59066	0.0156631	0.297201	8.84746	-0.197638	17.5402	-4.59066	-45.9066	15.6631	2.97201	8.84746	0.154417	-197.638	0.306134
31.861	1.471	1	1	3	0	0	-4.58872	0.0157881	0.299143	8.84773	-0.197655	17.5405	-4.58872	-45.8872	15.7881	2.99143	8.84773	0.154422	-197.655	0.306139
31.871	1.481	1	1	3	0	0	-4.58697	0.0158857	0.300893	8.85128	-0.20494	17.544	-4.58697	-45.8697	15.8857	3.00893	8.85128	0.154484	-204.94	0.306201
31.882	1.492	1	1	3	0	0	-4.58557	0.0155117	0.302294	8.84749	-0.196319	17.5402	-4.58557	-45.8557	15.5117	3.02294	8.84749	0.154418	-196.319	0.306135
31.893	1.503	1	1	3	0	0	-4.58339	0.0156562	0.30447	8.8472	-0.202589	17.54	-4.58339	-45.8339	15.6562	3.0447	8.8472	0.154413	-202.589	0.30613
31.903	1.513	1	1	3	0	0	-4.58159	0.0157101	0.306273	8.85363	-0.196267	17.5464	-4.58159	-45.8159	15.7101	3.06273	8.85363	0.154525	-196.267	0.306242
31.914	1.524	1	1	3	0	0	-4.57936	0.0155118	0.308505	8.85268	-0.203372	17.5454	-4.57936	-45.7936	15.5118	3.08505	8.85268	0.154508	-203.372	0.306226
31.925	1.535	1	1	3	0	0	-4.5779	0.0155785	0.309962	8.85046	-0.20623	17.5432	-4.5779	-45.779	15.5785	3.09962	8.85046	0.15447	-206.23	0.306187
31.935	1.545	1	1	3	0	0	-4.57607	0.0158143	0.311796	8.8492	-0.200507	17.542	-4.57607	-45.7607	15.8143	3.11796	8.8492	0.154448	-200.507	0.306165
31.946	1.556	1	1	3	0	0	-4.57455	0.0154464	0.313314	8.84912	-0.206283	17.5419	-4.57455	-45.7455	15.4464	3.13314	8.84912	0.154446	-206.283	0.306163
31.957	1.567	1	1	3	0	0	-4.57224	0.0155023	0.315625	8.85082	-0.214513	17.5436	-4.57224	-45.7224	15.5023	3.15625	8.85082	0.154476	-214.513	0.306193
31.967	1.577	1	1	3	0	0	-4.57009	0.0158584	0.317774	8.84733	-0.19634	17.5401	-4.57009	-45.7009	15.8584	3.17774	8.84733	0.154415	-196.34	0.306132
31.978	1.588	1	1	3	0	0	-4.56784	0.0153365	0.320022	8.85266	-0.195491	17.5454	-4.56784	-45.6784	15.3365	3.20022	8.85266	0.154508	-195.491	0.306225
31.989	1.599	1	1	3	0	0	-4.56547	0.0156781	0.322396	8.84975	-0.202656	17.5425	-4.56547	-45.6547	15.6781	3.22396	8.84975	0.154457	-202.656	0.306174
31.999	1.609	1	1	3	0	0	-4.56362	0.0157522	0.324244	8.8473	-0.189565	17.54	-4.56362	-45.6362	15.7522	3.24244	8.8473	0.154414	-189.565	0.306132
32.01	1.62	1	1	3	0	0	-4.56161	0.0154166	0.326249	8.8472	-0.193763	17.54	-4.56161	-45.6161	15.4166	3.26249	8.8472	0.154413	-193.763	0.30613
32.02	1.63	1	1	3	0	0	-4.56034	0.0156278	0.327524	8.84916	-0.189317	17.5419	-4.56034	-45.6034	15.6278	3.27524	8.84916	0.154447	-189.317	0.306164
32.031	1.641	1	1	3	0	0	-4.55873	0.0156344	0.32913	8.8476	-0.193185	17.5403	-4.55873	-45.5873	15.6344	3.2913	8.8476	0.15442	-193.185	0.306137
32.041	1.651	1	1	3	0	0	-4.55763	0.0152547	0.330235	8.85022	-0.183825	17.543	-4.55763	-45.5763	15.2547	3.30235	8.85022	0.154466	-183.825	0.306183
32.052	1.662	1	1	3	0	0	-4.5555	0.0155349	0.332366	8.8518	-0.193409	17.5446	-4.5555	-45.555	15.5349	3.32366	8.8518	0.154493	-193.409	0.30621
32.063	1.673	1	1	3	0	0	-4.55352	0.0157413	0.334343	8.84811	-0.18878	17.5409	-4.55352	-45.5352	15.7413	3.34343	8.84811	0.154429	-188.78	0.306146
32.074	1.684	1	1	3	0	0	-4.55121	0.0155952	0.336648	8.84648	-0.194018	17.5392	-4.55121	-45.5121	15.5952	3.36648	8.84648	0.1544	-194.018	0.306117
32.084	1.694	1	1	3	0	0	-4.54973	0.0155663	0.338134	8.84711	-0.171218	17.5399	-4.54973	-45.4973	15.5663	3.38134	8.84711	0.154411	-171.218	0.306128
32.095	1.705	1	1	3	0	0	-4.54746	0.0157637	0.340405	8.84744	-0.186981	17.5402	-4.54746	-45.4746	15.7637	3.40405	8.84744	0.154417	-186.981	0.306134
32.105	1.715	1	1	3	0	0	-4.54633	0.0153949	0.341536	8.85164	-0.187127	17.5444	-4.54633	-45.4633	15.3949	3.41536	8.85164	0.15449	-187.127	0.306207
32.116	1.726	1	1	3	0	0	-4.545	0.0155533	0.34286	8.84951	-0.173956	17.5423	-4.545	-45.45	15.5533	3.4286	8.84951	0.154453	-173.956	0.30617
32.127	1.737	1	1	3	0	0	-4.54294	0.0156331	0.344921	8.84943	-0.190098	17.5422	-4.54294	-45.4294	15.6331	3.44921	8.84943	0.154452	-190.098	0.306169
32.142	1.752	1	1	3	0	0	-4.54089	0.0152312	0.346974	8.85007	-0.21242	17.5428	-4.54089	-45.4089	15.2312	3.46974	8.85007	0.154463	-212.42	0.30618
32.153	1.763	1	1	3	0	0	-4.53838	0.0155408	0.349484	8.84711	-0.196187	17.5399	-4.53838	-45.3838	15.5408	3.49484	8.84711	0.154411	-196.187	0.306128
32.163	1.773	1	1	3	0	0	-4.53658	0.0151955	0.351278	8.85062	-0.202067	17.5434	-4.53658	-45.3658	15.1955	3.51278	8.85062	0.154472	-202.067	0.30619
32.174	1.784	1	1	3	0	0	-4.53517	0.0154179	0.352695	8.84702	-0.206089	17.5398	-4.53517	-45.3517	15.4179	3.52695	8.84702	0.15441	-206.089	0.306127
32.185	1.795	1	1	3	0	0	-4.53361	0.0155781	0.354255	8.84662	-0.207013	17.5394	-4.53361	-45.3361	15.5781	3.54255	8.84662	0.154403	-207.013	0.30612
32.196	1.806	1	1	3	0	0	-4.53139	0.0151626	0.356476	8.84955	-0.208201	17.5423	-4.53139	-45.3139	15.1626	3.56476	8.84955	0.154454	-208.201	0.306171
32.206	1.816	1	1	3	0	0	-4.52981	0.0153111	0.358057	8.85391	-0.195419	17.5467	-4.52981	-45.2981	15.3111	3.58057	8.85391	0.15453	-195.419	0.306247
32.217	1.827	1	1	3	0	0	-4.52799	0.0155499	0.359876	8.84714	-0.194676	17.5399	-4.52799	-45.2799	15.5499	3.59876	8.84714	0.154412	-194.676	0.306129
32.227	1.837	1	1	3	0	0	-4.52606	0.0153097	0.361802	8.85202	-0.18934	17.5448	-4.52606	-45.2606	15.3097	3.61802	8.85202	0.154497	-189.34	0.306214
32.238	1.848	1	1	3	0	0	-4.52401	0.0154201	0.363848	8.8505	-0.187105	17.5433	-4.52401	-45.2401	15.4201	3.63848	8.8505	0.15447	-187.105	0.306188
32.249	1.859	1	1	3	0	0	-4.52191	0.0159005	0.365956	8.84928	-0.181737	17.542	-4.52191	-45.2191	15.9005	3.65956	8.84928	0.154449	-181.737	0.306166
32.26	1.87	1	1	3	0	0	-4.51989	0.015438	0.367975	8.85025	-0.186685	17.543	-4.51989	-45.1989	15.438	3.67975	8.85025	0.154466	-186.685	0.306183
32.27	1.88	1	1	3	0	0	-4.51827	0.0156613	0.369591	8.85192	-0.190455	17.5447	-4.51827	-45.1827	15.6613	3.69591	8.85192	0.154495	-190.455	0.306212
32.281	1.891	1	1	3	0	0	-4.51694	0.0155255	0.370925	8.84788	-0.194958	17.5406	-4.51694	-45.1694	15.5255	3.70925	8.84788	0.154425	-194.958	0.306142
32.291	1.901	1	1	3	0	0	-4.51527	0.0153813	0.37259	8.84797	-0.1891	17.5407	-4.51527	-45.1527	15.3813	3.7259	8.84797	0.154426	-189.1	0.306144
32.302	1.912	1	1	3	0	0	-4.51368	0.0155475	0.374182	8.84781	-0.189899	17.5406	-4.51368	-45.1368	15.5475	3.74182	8.84781	0.154423	-189.899	0.306141
32.319	1.929	1	1	3	0	0	-4.51101	0.0158607	0.376848	8.84698	-0.176848	17.5397	-4.51101	-45.1101	15.8607	3.76848	8.84698	0.154409	-176.848	0.306126
32.33	1.94	1	1	3	0	0	-4.50889	0.0156023	0.378974	8.85021	-0.183053	17.543	-4.50889	-45.0889	15.6023	3.78974	8.85021	0.154465	-183.053	0.306183
32.34	1.95	1	1	3	0	0	-4.50684	0.0154597	0.381019	8.85203	-0.195792	17.5448	-4.50684	-45.0684	15.4597	3.81019	8.85203	0.154497	-195.792	0.306214
32.351	1.961	1	1	3	0	0	-4.50466	0.015879	0.383198	8.84726	-0.191204	17.54	-4.50466	-45.0466	15.879	3.83198	8.84726	0.154414	-191.204	0.306131
32.361	1.971	1	1	3	0	0	-4.50269	0.0156082	0.385172	8.84816	-0.203161	17.5409	-4.50269	-45.0269	15.6082	3.85172	8.84816	0.154429	-203.161	0.306147
32.372	1.982	1	1	3	0	0	-4.50134	0.0154988	0.386522	8.85146	-0.206042	17.5442	-4.50134	-45.0134	15.4988	3.86522	8.85146	0.154487	-206.042	0.306204
32.386	1.996	1	1	3	0	0	-4.49934	0.0154759	0.388523	8.85242	-0.201653	17.5452	-4.49934	-44.9934	15.4759	3.88523	8.85242	0.154504	-201.653	0.306221
32.397	2.007	1	1	3	0	0	-4.49739	0.0156638	0.390473	8.84785	-0.196307	17.5406	-4.49739	-44.9739	15.6638	3.90473	8.84785	0.154424	-196.307	0.306141
32.407	2.017	1	1	3	0	0	-4.49558	0.015787	0.392277	8.85351	-0.197297	17.5463	-4.49558	-44.9558	15.787	3.92277	8.85351	0.154523	-197.297	0.30624
32.418	2.028	1	1	3	0	0	-4.49324	0.0154286	0.394623	8.84879	-0.192305	17.5415	-4.49324	-44.9324	15.4286	3.94623	8.84879	0.154441	-192.305	0.306158
32.429	2.039	1	1	3	0	0	-4.49108	0.0156651	0.396784	8.85251	-0.193368	17.5453	-4.49108	-44.9108	15.6651	3.96784	8.85251	0.154505	-193.368	0.306223
32.44	2.05	1	1	3	0	0	-4.4898	0.0156709	0.398057	8.84758	-0.192995	17.5403	-4.4898	-44.898	15.6709	3.98057	8.84758	0.154419	-192.995	0.306137
32.45	2.06	1	1	3	0	0	-4.48825	0.015239	0.399608	8.84852	-0.189533	17.5413	-4.48825	-44.8825	15.239	3.99608	8.84852	0.154436	-189.533	0.306153
32.461	2.071	1	1	3	0	0	-4.48636	0.0153783	0.401505	8.84748	-0.191604	17.5402	-4.48636	-44.8636	15.3783	4.01505	8.84748	0.154418	-191.604	0.306135
32.471	2.081	1	1	3	0	0	-4.4839	0.0156718	0.403959	8.84906	-0.185834	17.5418	-4.4839	-44.839	15.6718	4.03959	8.84906	0.154445	-185.834	0.306162
32.482	2.092	1	1	3	0	0	-4.48215	0.0152924	0.405713	8.84846	-0.190483	17.5412	-4.48215	-44.8215	15.2924	4.05713	8.84846	0.154435	-190.483	0.306152
32.493	2.103	1	1	3	0	0	-4.48068	0.015168	0.407178	8.85011	-0.19509	17.5429	-4.48068	-44.8068	15.168	4.07178	8.85011	0.154464	-195.09	0.306181
32.504	2.114	1	1	3	0	0	-4.4791	0.0156475	0.40876	8.84935	-0.193956	17.5421	-4.4791	-44.791	15.6475	4.0876	8.84935	0.15445	-193.956	0.306167
32.514	2.124	1	1	3	0	0	-4.47732	0.0151997	0.410542	8.85275	-0.216288	17.5455	-4.47732	-44.7732	15.1997	4.10542	8.85275	0.15451	-216.288	0.306227
32.525	2.135	1	1	3	0	0	-4.47571	0.0153186	0.412151	8.85362	-0.204034	17.5464	-4.47571	-44.7571	15.3186	4.12151	8.85362	0.154525	-204.034	0.306242
32.535	2.145	1	1	3	0	0	-4.47413	0.0155891	0.413735	8.84825	-0.207819	17.541	-4.47413	-44.7413	15.5891	4.13735	8.84825	0.154431	-207.819	0.306148
32.546	2.156	1	1	3	0	0	-4.47209	0.0153503	0.415772	8.84703	-0.206359	17.5398	-4.47209	-44.7209	15.3503	4.15772	8.84703	0.15441	-206.359	0.306127
32.557	2.167	1	1	3	0	0	-4.47006	0.0154093	0.417804	8.85347	-0.200846	17.5462	-4.47006	-44.7006	15.4093	4.17804	8.85347	0.154522	-200.846	0.306239
32.568	2.178	1	1	3	0	0	-4.46843	0.015597	0.41943	8.85037	-0.194469	17.5431	-4.46843	-44.6843	15.597	4.1943	8.85037	0.154468	-194.469	0.306185
32.578	2.188	1	1	3	0	0	-4.46683	0.015133	0.421036	8.85062	-0.190034	17.5434	-4.46683	-44.6683	15.133	4.21036	8.85062	0.154472	-190.034	0.30619
32.589	2.199	1	1	3	0	0	-4.46442	0.0154349	0.423437	8.85169	-0.188581	17.5444	-4.46442	-44.6442	15.4349	4.23437	8.85169	0.154491	-188.581	0.306208
32.599	2.209	1	1	3	0	0	-4.46264	0.0155167	0.425218	8.85292	-0.19833	17.5457	-4.46264	-44.6264	15.5167	4.25218	8.85292	0.154513	-198.33	0.30623
32.61	2.22	1	1	3	0	0	-4.46084	0.0152449	0.427024	8.84824	-0.188034	17.541	-4.46084	-44.6084	15.2449	4.27024	8.84824	0.154431	-188.034	0.306148
32.621	2.231	1	1	3	0	0	-4.45885	0.0152783	0.429015	8.84844	-0.182417	17.5412	-4.45885	-44.5885	15.2783	4.29015	8.84844	0.154434	-182.417	0.306151
32.632	2.242	1	1	3	0	0	-4.45688	0.0154267	0.430984	8.85327	-0.193058	17.546	-4.45688	-44.5688	15.4267	4.30984	8.85327	0.154519	-193.058	0.306236
32.642	2.252	1	1	3	0	0	-4.45543	0.0150047	0.432434	8.85241	-0.182742	17.5452	-4.45543	-44.5543	15.0047	4.32434	8.85241	0.154504	-182.742	0.306221
32.653	2.263	1	1	3	0	0	-4.45371	0.0151619	0.434156	8.84785	-0.193151	17.5406	-4.45371	-44.5371	15.1619	4.34156	8.84785	0.154424	-193.151	0.306141
32.663	2.273	1	1	3	0	0	-4.45268	0.015425	0.435187	8.85447	-0.196875	17.5472	-4.45268	-44.5268	15.425	4.35187	8.85447	0.15454	-196.875	0.306257
32.674	2.284	1	1	3	0	0	-4.45085	0.0151077	0.43701	8.84836	-0.194958	17.5411	-4.45085	-44.5085	15.1077	4.3701	8.84836	0.154433	-194.958	0.30615
32.685	2.295	1	1	3	0	0	-4.44848	0.0154298	0.439384	8.85089	-0.197453	17.5436	-4.44848	-44.4848	15.4298	4.39384	8.85089	0.154477	-197.453	0.306194
32.696	2.306	1	1	3	0	0	-4.44637	0.0155163	0.44149	8.84742	-0.190077	17.5402	-4.44637	-44.4637	15.5163	4.4149	8.84742	0.154417	-190.077	0.306134
32.706	2.316	1	1	3	0	0	-4.44428	0.0153871	0.443585	8.84832	-0.201034	17.5411	-4.44428	-44.4428	15.3871	4.43585	8.84832	0.154432	-201.034	0.306149
32.717	2.327	1	1	3	0	0	-4.44199	0.0156117	0.445874	8.8503	-0.198833	17.5431	-4.44199	-44.4199	15.6117	4.45874	8.8503	0.154467	-198.833	0.306184
32.727	2.337	1	1	3	0	0	-4.44048	0.0157471	0.447382	8.8494	-0.1978	17.5422	-4.44048	-44.4048	15.7471	4.47382	8.8494	0.154451	-197.8	0.306168
32.738	2.348	1	1	3	0	0	-4.43892	0.0152721	0.448944	8.84771	-0.198127	17.5405	-4.43892	-44.3892	15.2721	4.48944	8.84771	0.154422	-198.127	0.306139
32.749	2.359	1	1	3	0	0	-4.43759	0.0155947	0.450271	8.8494	-0.203257	17.5422	-4.43759	-44.3759	15.5947	4.50271	8.8494	0.154451	-203.257	0.306168
32.76	2.37	1	1	3	0	0	-4.43638	0.0158142	0.451482	8.85348	-0.190797	17.5462	-4.43638	-44.3638	15.8142	4.51482	8.85348	0.154522	-190.797	0.30624
32.77	2.38	1	1	3	0	0	-4.43438	0.0152684	0.453484	8.84918	-0.206085	17.5419	-4.43438	-44.3438	15.2684	4.53484	8.84918	0.154447	-206.085	0.306165
32.781	2.391	1	1	3	0	0	-4.4323	0.0154117	0.455557	8.84932	-0.193657	17.5421	-4.4323	-44.323	15.4117	4.55557	8.84932	0.15445	-193.657	0.306167
32.791	2.401	1	1	3	0	0	-4.43078	0.0156138	0.457079	8.84948	-0.207785	17.5422	-4.43078	-44.3078	15.6138	4.57079	8.84948	0.154453	-207.785	0.30617
32.802	2.412	1	1	3	0	0	-4.42907	0.0150395	0.45879	8.84832	-0.205128	17.5411	-4.42907	-44.2907	15.0395	4.5879	8.84832	0.154432	-205.128	0.30615
32.813	2.423	1	1	3	0	0	-4.42644	0.0154279	0.461424	8.84735	-0.194404	17.5401	-4.42644	-44.2644	15.4279	4.61424	8.84735	0.154415	-194.404	0.306133
32.824	2.434	1	1	3	0	0	-4.42418	0.0153862	0.463678	8.853	-0.196891	17.5458	-4.42418	-44.2418	15.3862	4.63678	8.853	0.154514	-196.891	0.306231
32.834	2.444	1	1	3	0	0	-4.42231	0.0150142	0.465555	8.85212	-0.204868	17.5449	-4.42231	-44.2231	15.0142	4.65555	8.85212	0.154499	-204.868	0.306216
32.845	2.455	1	1	3	0	0	-4.42055	0.0151821	0.467312	8.84908	-0.197664	17.5418	-4.42055	-44.2055	15.1821	4.67312	8.84908	0.154446	-197.664	0.306163
32.855	2.465	1	1	3	0	0	-4.41874	0.0152786	0.469126	8.85256	-0.198451	17.5453	-4.41874	-44.1874	15.2786	4.69126	8.85256	0.154506	-198.451	0.306223
32.866	2.476	1	1	3	0	0	-4.41697	0.014785	0.470895	8.85043	-0.199591	17.5432	-4.41697	-44.1697	14.785	4.70895	8.85043	0.154469	-199.591	0.306186
32.877	2.487	1	1	3	0	0	-4.41485	0.0152731	0.473011	8.85228	-0.197881	17.545	-4.41485	-44.1485	15.2731	4.73011	8.85228	0.154501	-197.881	0.306219
32.888	2.498	1	1	3	0	0	-4.41344	0.0150223	0.474418	8.84939	-0.190617	17.5422	-4.41344	-44.1344	15.0223	4.74418	8.84939	0.154451	-190.617	0.306168
32.898	2.508	1	1	3	0	0	-4.41188	0.0148548	0.475984	8.85212	-0.186914	17.5449	-4.41188	-44.1188	14.8548	4.75984	8.85212	0.154499	-186.914	0.306216
32.909	2.519	1	1	3	0	0	-4.4102	0.0151248	0.477663	8.8536	-0.190616	17.5463	-4.4102	-44.102	15.1248	4.77663	8.8536	0.154524	-190.616	0.306242
32.919	2.529	1	1	3	0	0	-4.40845	0.0151824	0.479409	8.84932	-0.205699	17.5421	-4.40845	-44.0845	15.1824	4.79409	8.84932	0.15445	-205.699	0.306167
32.93	2.54	1	1	3	0	0	-4.40684	0.0150744	0.481025	8.85059	-0.196198	17.5433	-4.40684	-44.0684	15.0744	4.81025	8.85059	0.154472	-196.198	0.306189
32.941	2.551	1	1	3	0	0	-4.40486	0.0150532	0.482998	8.85009	-0.185796	17.5428	-4.40486	-44.0486	15.0532	4.82998	8.85009	0.154463	-185.796	0.30618
32.952	2.562	1	1	3	0	0	-4.40287	0.0152228	0.484992	8.8519	-0.190086	17.5447	-4.40287	-44.0287	15.2228	4.84992	8.8519	0.154495	-190.086	0.306212
32.962	2.572	1	1	3	0	0	-4.40159	0.0146023	0.486277	8.84968	-0.188733	17.5424	-4.40159	-44.0159	14.6023	4.86277	8.84968	0.154456	-188.733	0.306173
32.973	2.583	1	1	3	0	0	-4.39991	0.0149582	0.48795	8.84985	-0.193737	17.5426	-4.39991	-43.9991	14.9582	4.8795	8.84985	0.154459	-193.737	0.306176
32.983	2.593	1	1	3	0	0	-4.39856	0.0152712	0.489302	8.8517	-0.199226	17.5445	-4.39856	-43.9856	15.2712	4.89302	8.8517	0.154491	-199.226	0.306209
32.994	2.604	1	1	3	0	0	-4.39669	0.0146515	0.491168	8.85019	-0.206805	17.5429	-4.39669	-43.9669	14.6515	4.91168	8.85019	0.154465	-206.805	0.306182
33.005	2.615	1	1	3	0	0	-4.39459	0.0149512	0.493272	8.8504	-0.193309	17.5431	-4.39459	-43.9459	14.9512	4.93272	8.8504	0.154469	-193.309	0.306186
33.016	2.626	1	1	3	0	0	-4.39212	0.0150894	0.495743	8.85343	-0.189638	17.5462	-4.39212	-43.9212	15.0894	4.95743	8.85343	0.154522	-189.638	0.306239
33.026	2.636	1	1	3	0	0	-4.39029	0.0145877	0.497571	8.84885	-0.205989	17.5416	-4.39029	-43.9029	14.5877	4.97571	8.84885	0.154442	-205.989	0.306159
33.037	2.647	1	1	3	0	0	-4.38889	0.0148981	0.498969	8.85032	-0.207086	17.5431	-4.38889	-43.8889	14.8981	4.98969	8.85032	0.154467	-207.086	0.306184
33.047	2.657	1	1	3	0	0	-4.38752	0.0150909	0.500347	8.8492	-0.199494	17.5419	-4.38752	-43.8752	15.0909	5.00347	8.8492	0.154448	-199.494	0.306165
33.058	2.668	1	1	3	0	0	-4.38526	0.0148104	0.502603	8.84854	-0.194483	17.5413	-4.38526	-43.8526	14.8104	5.02603	8.84854	0.154436	-194.483	0.306153
33.075	2.685	1	1	3	0	0	-4.38268	0.0151308	0.505179	8.84793	-0.185449	17.5407	-4.38268	-43.8268	15.1308	5.05179	8.84793	0.154425	-185.449	0.306143
33.086	2.696	1	1	3	0	0	-4.38111	0.0150197	0.506755	8.85102	-0.198327	17.5438	-4.38111	-43.8111	15.0197	5.06755	8.85102	0.154479	-198.327	0.306197
33.096	2.706	1	1	3	0	0	-4.37948	0.0149731	0.508378	8.85064	-0.195691	17.5434	-4.37948	-43.7948	14.9731	5.08378	8.85064	0.154473	-195.691	0.30619
33.107	2.717	1	1	3	0	0	-4.37787	0.0151292	0.509997	8.85184	-0.183968	17.5446	-4.37787	-43.7787	15.1292	5.09997	8.85184	0.154494	-183.968	0.306211
33.118	2.728	1	1	3	0	0	-4.37542	0.0153162	0.512444	8.85077	-0.185107	17.5435	-4.37542	-43.7542	15.3162	5.12444	8.85077	0.154475	-185.107	0.306192
33.129	2.739	1	1	3	0	0	-4.37455	0.0148437	0.513312	8.85215	-0.187366	17.5449	-4.37455	-43.7455	14.8437	5.13312	8.85215	0.154499	-187.366	0.306216
33.139	2.749	1	1	3	0	0	-4.37316	0.015121	0.514704	8.85136	-0.20377	17.5441	-4.37316	-43.7316	15.121	5.14704	8.85136	0.154485	-203.77	0.306203
33.15	2.76	1	1	3	0	0	-4.37086	0.0152861	0.517007	8.85208	-0.19214	17.5448	-4.37086	-43.7086	15.2861	5.17007	8.85208	0.154498	-192.14	0.306215
33.16	2.77	1	1	3	0	0	-4.36868	0.0148923	0.519187	8.84926	-0.175415	17.542	-4.36868	-43.6868	14.8923	5.19187	8.84926	0.154449	-175.415	0.306166
33.171	2.781	1	1	3	0	0	-4.36686	0.0150277	0.521	8.85087	-0.164861	17.5436	-4.36686	-43.6686	15.0277	5.21	8.85087	0.154477	-164.861	0.306194
33.182	2.792	1	1	3	0	0	-4.36512	0.015192	0.522745	8.85027	-0.178152	17.543	-4.36512	-43.6512	15.192	5.22745	8.85027	0.154466	-178.152	0.306183
33.197	2.807	1	1	3	0	0	-4.36238	0.015201	0.525483	8.84744	-0.186415	17.5402	-4.36238	-43.6238	15.201	5.25483	8.84744	0.154417	-186.415	0.306134
33.208	2.818	1	1	3	0	0	-4.36064	0.0153014	0.527221	8.85181	-0.202483	17.5446	-4.36064	-43.6064	15.3014	5.27221	8.85181	0.154493	-202.483	0.30621
33.218	2.828	1	1	3	0	0	-4.35893	0.0149476	0.528931	8.84757	-0.195304	17.5403	-4.35893	-43.5893	14.9476	5.28931	8.84757	0.154419	-195.304	0.306136
33.229	2.839	1	1	3	0	0	-4.35711	0.015166	0.530757	8.84966	-0.199335	17.5424	-4.35711	-43.5711	15.166	5.30757	8.84966	0.154456	-199.335	0.306173
33.24	2.85	1	1	3	0	0	-4.35511	0.0153162	0.532751	8.84985	-0.20574	17.5426	-4.35511	-43.5511	15.3162	5.32751	8.84985	0.154459	-205.74	0.306176
33.251	2.861	1	1	3	0	0	-4.35334	0.0150514	0.534526	8.85286	-0.207691	17.5456	-4.35334	-43.5334	15.0514	5.34526	8.85286	0.154512	-207.691	0.306229
33.261	2.871	1	1	3	0	0	-4.35186	0.0151654	0.535999	8.85141	-0.185811	17.5442	-4.35186	-43.5186	15.1654	5.35999	8.85141	0.154486	-185.811	0.306203
33.272	2.882	1	1	3	0	0	-4.35066	0.0153023	0.537201	8.84768	-0.198038	17.5404	-4.35066	-43.5066	15.3023	5.37201	8.84768	0.154421	-198.038	0.306138
33.282	2.892	1	1	3	0	0	-4.34924	0.0149946	0.538626	8.85128	-0.200083	17.544	-4.34924	-43.4924	14.9946	5.38626	8.85128	0.154484	-200.083	0.306201
33.293	2.903	1	1	3	0	0	-4.34693	0.0152863	0.54093	8.85345	-0.199954	17.5462	-4.34693	-43.4693	15.2863	5.4093	8.85345	0.154522	-199.954	0.306239
33.304	2.914	1	1	3	0	0	-4.34562	0.0152665	0.542243	8.85006	-0.194798	17.5428	-4.34562	-43.4562	15.2665	5.42243	8.85006	0.154463	-194.798	0.30618
33.315	2.925	1	1	3	0	0	-4.34329	0.0149422	0.544573	8.84908	-0.191286	17.5418	-4.34329	-43.4329	14.9422	5.44573	8.84908	0.154446	-191.286	0.306163
33.325	2.935	1	1	3	0	0	-4.34189	0.0150646	0.545971	8.84836	-0.206407	17.5411	-4.34189	-43.4189	15.0646	5.45971	8.84836	0.154433	-206.407	0.30615
33.336	2.946	1	1	3	0	0	-4.33928	0.015243	0.548583	8.85091	-0.204288	17.5437	-4.33928	-43.3928	15.243	5.48583	8.85091	0.154478	-204.288	0.306195
33.346	2.956	1	1	3	0	0	-4.33745	0.0150243	0.550414	8.84961	-0.202974	17.5424	-4.33745	-43.3745	15.0243	5.50414	8.84961	0.154455	-202.974	0.306172
33.357	2.967	1	1	3	0	0	-4.33526	0.0150271	0.552605	8.85046	-0.209394	17.5432	-4.33526	-43.3526	15.0271	5.52605	8.85046	0.15447	-209.394	0.306187
33.368	2.978	1	1	3	0	0	-4.3336	0.0151088	0.554265	8.84862	-0.212123	17.5414	-4.3336	-43.336	15.1088	5.54265	8.84862	0.154438	-212.123	0.306155
33.379	2.989	1	1	3	0	0	-4.33161	0.014681	0.556255	8.8481	-0.210639	17.5409	-4.33161	-43.3161	14.681	5.56255	8.8481	0.154428	-210.639	0.306146
33.389	2.999	1	1	3	0	0	-4.32977	0.0148764	0.558091	8.85087	-0.213698	17.5436	-4.32977	-43.2977	14.8764	5.58091	8.85087	0.154477	-213.698	0.306194
33.4	3.01	1	1	3	0	0	-4.32775	0.0150368	0.560116	8.8493	-0.207933	17.5421	-4.32775	-43.2775	15.0368	5.60116	8.8493	0.154449	-207.933	0.306167
33.41	3.02	1	1	3	0	0	-4.32593	0.0144928	0.561933	8.85016	-0.200297	17.5429	-4.32593	-43.2593	14.4928	5.61933	8.85016	0.154464	-200.297	0.306182
33.421	3.031	1	1	3	0	0	-4.32445	0.0146095	0.563413	8.84851	-0.196982	17.5413	-4.32445	-43.2445	14.6095	5.63413	8.84851	0.154436	-196.982	0.306153
33.432	3.042	1	1	3	0	0	-4.32196	0.014956	0.565904	8.85433	-0.201804	17.5471	-4.32196	-43.2196	14.956	5.65904	8.85433	0.154537	-201.804	0.306254
33.443	3.053	1	1	3	0	0	-4.32074	0.0143529	0.567122	8.84755	-0.187043	17.5403	-4.32074	-43.2074	14.3529	5.67122	8.84755	0.154419	-187.043	0.306136
33.453	3.063	1	1	3	0	0	-4.31922	0.014485	0.56864	8.85286	-0.189923	17.5456	-4.31922	-43.1922	14.485	5.6864	8.85286	0.154511	-189.923	0.306229
33.464	3.074	1	1	3	0	0	-4.31698	0.0148145	0.570881	8.85013	-0.200254	17.5429	-4.31698	-43.1698	14.8145	5.70881	8.85013	0.154464	-200.254	0.306181
33.474	3.084	1	1	3	0	0	-4.31517	0.0144332	0.572695	8.8498	-0.188991	17.5425	-4.31517	-43.1517	14.4332	5.72695	8.8498	0.154458	-188.991	0.306175
33.485	3.095	1	1	3	0	0	-4.31367	0.0146765	0.574196	8.85196	-0.18944	17.5447	-4.31367	-43.1367	14.6765	5.74196	8.85196	0.154496	-189.44	0.306213
33.496	3.106	1	1	3	0	0	-4.31224	0.0146798	0.57562	8.8476	-0.179378	17.5404	-4.31224	-43.1224	14.6798	5.7562	8.8476	0.15442	-179.378	0.306137
33.507	3.117	1	1	3	0	0	-4.31081	0.0144235	0.577049	8.84982	-0.185313	17.5426	-4.31081	-43.1081	14.4235	5.77049	8.84982	0.154458	-185.313	0.306176
33.517	3.127	1	1	3	0	0	-4.30885	0.0145996	0.579015	8.85167	-0.207351	17.5444	-4.30885	-43.0885	14.5996	5.79015	8.85167	0.154491	-207.351	0.306208
33.528	3.138	1	1	3	0	0	-4.30721	0.0147839	0.580656	8.84764	-0.197701	17.5404	-4.30721	-43.0721	14.7839	5.80656	8.84764	0.15442	-197.701	0.306138
33.538	3.148	1	1	3	0	0	-4.30577	0.0145198	0.582094	8.84986	-0.196253	17.5426	-4.30577	-43.0577	14.5198	5.82094	8.84986	0.154459	-196.253	0.306176
33.549	3.159	1	1	3	0	0	-4.30446	0.0145874	0.583399	8.85173	-0.200166	17.5445	-4.30446	-43.0446	14.5874	5.83399	8.85173	0.154492	-200.166	0.306209
33.56	3.17	1	1	3	0	0	-4.30239	0.0149648	0.585473	8.8518	-0.206055	17.5446	-4.30239	-43.0239	14.9648	5.85473	8.8518	0.154493	-206.055	0.30621
33.571	3.181	1	1	3	0	0	-4.30098	0.0143162	0.586884	8.85339	-0.196581	17.5461	-4.30098	-43.0098	14.3162	5.86884	8.85339	0.154521	-196.581	0.306238
33.581	3.191	1	1	3	0	0	-4.29871	0.0146823	0.589147	8.84808	-0.18422	17.5408	-4.29871	-42.9871	14.6823	5.89147	8.84808	0.154428	-184.22	0.306145
33.592	3.202	1	1	3	0	0	-4.29645	0.0148844	0.591408	8.85516	-0.184207	17.5479	-4.29645	-42.9645	14.8844	5.91408	8.85516	0.154552	-184.207	0.306269
33.602	3.212	1	1	3	0	0	-4.29493	0.0144409	0.592931	8.84983	-0.180392	17.5426	-4.29493	-42.9493	14.4409	5.92931	8.84983	0.154459	-180.392	0.306176
33.613	3.223	1	1	3	0	0	-4.29323	0.0145525	0.594635	8.85065	-0.188321	17.5434	-4.29323	-42.9323	14.5525	5.94635	8.85065	0.154473	-188.321	0.30619
33.624	3.234	1	1	3	0	0	-4.29221	0.0147352	0.59565	8.84912	-0.182875	17.5419	-4.29221	-42.9221	14.7352	5.9565	8.84912	0.154446	-182.875	0.306163
33.635	3.245	1	1	3	0	0	-4.29067	0.0145493	0.597188	8.85267	-0.205712	17.5454	-4.29067	-42.9067	14.5493	5.97188	8.85267	0.154508	-205.712	0.306225
33.645	3.255	1	1	3	0	0	-4.28926	0.0147009	0.598602	8.84945	-0.192656	17.5422	-4.28926	-42.8926	14.7009	5.98602	8.84945	0.154452	-192.656	0.306169
33.656	3.266	1	1	3	0	0	-4.28668	0.014804	0.601184	8.8504	-0.189248	17.5432	-4.28668	-42.8668	14.804	6.01184	8.8504	0.154469	-189.248	0.306186
33.666	3.276	1	1	3	0	0	-4.28497	0.014526	0.602893	8.85102	-0.194485	17.5438	-4.28497	-42.8497	14.526	6.02893	8.85102	0.154479	-194.485	0.306197
33.677	3.287	1	1	3	0	0	-4.28325	0.0146884	0.604613	8.85191	-0.196654	17.5447	-4.28325	-42.8325	14.6884	6.04613	8.85191	0.154495	-196.654	0.306212
33.688	3.298	1	1	3	0	0	-4.28153	0.0149003	0.606336	8.85189	-0.202892	17.5446	-4.28153	-42.8153	14.9003	6.06336	8.85189	0.154495	-202.892	0.306212
33.699	3.309	1	1	3	0	0	-4.28003	0.014506	0.607834	8.84756	-0.198788	17.5403	-4.28003	-42.8003	14.506	6.07834	8.84756	0.154419	-198.788	0.306136
33.709	3.319	1	1	3	0	0	-4.27892	0.0146739	0.608938	8.84974	-0.197071	17.5425	-4.27892	-42.7892	14.6739	6.08938	8.84974	0.154457	-197.071	0.306174
33.72	3.33	1	1	3	0	0	-4.27666	0.0150577	0.611204	8.85263	-0.203501	17.5454	-4.27666	-42.7666	15.0577	6.11204	8.85263	0.154508	-203.501	0.306225
33.73	3.34	1	1	3	0	0	-4.27504	0.0148166	0.612827	8.84874	-0.188438	17.5415	-4.27504	-42.7504	14.8166	6.12827	8.84874	0.15444	-188.438	0.306157
33.741	3.351	1	1	3	0	0	-4.27291	0.0149194	0.614957	8.85582	-0.201195	17.5486	-4.27291	-42.7291	14.9194	6.14957	8.85582	0.154563	-201.195	0.30628
33.752	3.362	1	1	3	0	0	-4.27138	0.0152874	0.616486	8.8487	-0.194505	17.5415	-4.27138	-42.7138	15.2874	6.16486	8.8487	0.154439	-194.505	0.306156
33.763	3.373	1	1	3	0	0	-4.2701	0.0147627	0.617767	8.85426	-0.195671	17.547	-4.2701	-42.701	14.7627	6.17767	8.85426	0.154536	-195.671	0.306253
33.773	3.383	1	1	3	0	0	-4.26816	0.0150429	0.619706	8.85319	-0.18496	17.5459	-4.26816	-42.6816	15.0429	6.19706	8.85319	0.154517	-184.96	0.306234
33.784	3.394	1	1	3	0	0	-4.26652	0.0151101	0.621339	8.84827	-0.196951	17.541	-4.26652	-42.6652	15.1101	6.21339	8.84827	0.154431	-196.951	0.306149
33.794	3.404	1	1	3	0	0	-4.26459	0.0150903	0.623274	8.85004	-0.185363	17.5428	-4.26459	-42.6459	15.0903	6.23274	8.85004	0.154462	-185.363	0.30618
33.805	3.415	1	1	3	0	0	-4.26311	0.0153271	0.624755	8.85361	-0.202078	17.5464	-4.26311	-42.6311	15.3271	6.24755	8.85361	0.154525	-202.078	0.306242
33.816	3.426	1	1	3	0	0	-4.2607	0.0154475	0.627164	8.84862	-0.194781	17.5414	-4.2607	-42.607	15.4475	6.27164	8.84862	0.154438	-194.781	0.306155
33.827	3.437	1	1	3	0	0	-4.25892	0.0150617	0.628941	8.84973	-0.199424	17.5425	-4.25892	-42.5892	15.0617	6.28941	8.84973	0.154457	-199.424	0.306174
33.837	3.447	1	1	3	0	0	-4.25715	0.0153247	0.630713	8.84992	-0.21291	17.5427	-4.25715	-42.5715	15.3247	6.30713	8.84992	0.15446	-212.91	0.306177
33.848	3.458	1	1	3	0	0	-4.25537	0.0155161	0.632491	8.85144	-0.204562	17.5442	-4.25537	-42.5537	15.5161	6.32491	8.85144	0.154487	-204.562	0.306204
33.858	3.468	1	1	3	0	0	-4.25351	0.0150604	0.634352	8.85053	-0.199528	17.5433	-4.25351	-42.5351	15.0604	6.34352	8.85053	0.154471	-199.528	0.306188
33.869	3.479	1	1	3	0	0	-4.25153	0.0152652	0.636336	8.85013	-0.202321	17.5429	-4.25153	-42.5153	15.2652	6.36336	8.85013	0.154464	-202.321	0.306181
33.88	3.49	1	1	3	0	0	-4.24938	0.0154396	0.638487	8.85483	-0.206382	17.5476	-4.24938	-42.4938	15.4396	6.38487	8.85483	0.154546	-206.382	0.306263
33.891	3.501	1	1	3	0	0	-4.2479	0.015074	0.639959	8.84928	-0.201866	17.542	-4.2479	-42.479	15.074	6.39959	8.84928	0.154449	-201.866	0.306166
33.901	3.511	1	1	3	0	0	-4.24679	0.0151843	0.641077	8.84971	-0.204562	17.5425	-4.24679	-42.4679	15.1843	6.41077	8.84971	0.154457	-204.562	0.306174
33.912	3.522	1	1	3	0	0	-4.24503	0.0154517	0.642833	8.85105	-0.208225	17.5438	-4.24503	-42.4503	15.4517	6.42833	8.85105	0.15448	-208.225	0.306197
33.922	3.532	1	1	3	0	0	-4.24367	0.014949	0.64419	8.85067	-0.20241	17.5434	-4.24367	-42.4367	14.949	6.4419	8.85067	0.154473	-202.41	0.306191
33.933	3.543	1	1	3	0	0	-4.24171	0.0154206	0.646155	8.84928	-0.206698	17.542	-4.24171	-42.4171	15.4206	6.46155	8.84928	0.154449	-206.698	0.306166
33.944	3.554	1	1	3	0	0	-4.23999	0.015491	0.647875	8.85201	-0.206661	17.5448	-4.23999	-42.3999	15.491	6.47875	8.85201	0.154497	-206.661	0.306214
33.955	3.565	1	1	3	0	0	-4.238	0.0153237	0.649863	8.85329	-0.200872	17.546	-4.238	-42.38	15.3237	6.49863	8.85329	0.154519	-200.872	0.306236
33.965	3.575	1	1	3	0	0	-4.23567	0.0154062	0.65219	8.85208	-0.195171	17.5448	-4.23567	-42.3567	15.4062	6.5219	8.85208	0.154498	-195.171	0.306215
33.976	3.586	1	1	3	0	0	-4.23391	0.0155525	0.653951	8.85036	-0.191053	17.5431	-4.23391	-42.3391	15.5525	6.53951	8.85036	0.154468	-191.053	0.306185
33.986	3.596	1	1	3	0	0	-4.23236	0.0152243	0.655505	8.85168	-0.214623	17.5444	-4.23236	-42.3236	15.2243	6.55505	8.85168	0.154491	-214.623	0.306208
33.997	3.607	1	1	3	0	0	-4.2308	0.0153466	0.657067	8.85458	-0.20881	17.5473	-4.2308	-42.308	15.3466	6.57067	8.85458	0.154542	-208.81	0.306259
34.008	3.618	1	1	3	0	0	-4.22896	0.0154597	0.6589	8.8497	-0.198168	17.5425	-4.22896	-42.2896	15.4597	6.589	8.8497	0.154456	-198.168	0.306174
34.019	3.629	1	1	3	0	0	-4.227	0.0152029	0.660859	8.853	-0.1962	17.5457	-4.227	-42.27	15.2029	6.60859	8.853	0.154514	-196.2	0.306231
34.029	3.639	1	1	3	0	0	-4.22525	0.0154235	0.662616	8.85258	-0.187019	17.5453	-4.22525	-42.2525	15.4235	6.62616	8.85258	0.154507	-187.019	0.306224
34.04	3.65	1	1	3	0	0	-4.22311	0.0157121	0.664751	8.84948	-0.186677	17.5422	-4.22311	-42.2311	15.7121	6.64751	8.84948	0.154453	-186.677	0.30617
34.051	3.661	1	1	3	0	0	-4.22174	0.015247	0.66612	8.85206	-0.187359	17.5448	-4.22174	-42.2174	15.247	6.6612	8.85206	0.154498	-187.359	0.306215
34.062	3.672	1	1	3	0	0	-4.21996	0.0156757	0.667902	8.85123	-0.188653	17.544	-4.21996	-42.1996	15.6757	6.67902	8.85123	0.154483	-188.653	0.3062
34.072	3.682	1	1	3	0	0	-4.21812	0.0160058	0.669739	8.85265	-0.184168	17.5454	-4.21812	-42.1812	16.0058	6.69739	8.85265	0.154508	-184.168	0.306225
34.083	3.693	1	1	3	0	0	-4.21703	0.0153562	0.670833	8.85018	-0.196234	17.5429	-4.21703	-42.1703	15.3562	6.70833	8.85018	0.154465	-196.234	0.306182
34.093	3.703	1	1	3	0	0	-4.21532	0.016016	0.672541	8.8529	-0.207853	17.5456	-4.21532	-42.1532	16.016	6.72541	8.8529	0.154512	-207.853	0.306229
34.104	3.714	1	1	3	0	0	-4.21363	0.0161453	0.674232	8.84831	-0.194315	17.5411	-4.21363	-42.1363	16.1453	6.74232	8.84831	0.154432	-194.315	0.306149
34.115	3.725	1	1	3	0	0	-4.21184	0.0160245	0.676021	8.85319	-0.196077	17.5459	-4.21184	-42.1184	16.0245	6.76021	8.85319	0.154517	-196.077	0.306234
34.126	3.736	1	1	3	0	0	-4.21057	0.0162384	0.67729	8.84896	-0.186252	17.5417	-4.21057	-42.1057	16.2384	6.7729	8.84896	0.154443	-186.252	0.306161
34.136	3.746	1	1	3	0	0	-4.20881	0.0166296	0.679057	8.85614	-0.211032	17.5489	-4.20881	-42.0881	16.6296	6.79057	8.85614	0.154569	-211.032	0.306286
34.147	3.757	1	1	3	0	0	-4.20715	0.0163174	0.680715	8.85183	-0.201174	17.5446	-4.20715	-42.0715	16.3174	6.80715	8.85183	0.154494	-201.174	0.306211
34.157	3.767	1	1	3	0	0	-4.20559	0.016622	0.682275	8.85011	-0.204469	17.5429	-4.20559	-42.0559	16.622	6.82275	8.85011	0.154464	-204.469	0.306181
34.168	3.778	1	1	3	0	0	-4.20402	0.0167936	0.683844	8.85159	-0.196762	17.5444	-4.20402	-42.0402	16.7936	6.83844	8.85159	0.154489	-196.762	0.306207
34.179	3.789	1	1	3	0	0	-4.20254	0.0167046	0.685327	8.85389	-0.201545	17.5466	-4.20254	-42.0254	16.7046	6.85327	8.85389	0.15453	-201.545	0.306247
34.19	3.8	1	1	3	0	0	-4.20041	0.0168446	0.687448	8.84849	-0.183331	17.5412	-4.20041	-42.0041	16.8446	6.87448	8.84849	0.154435	-183.331	0.306153
34.2	3.81	1	1	3	0	0	-4.19914	0.0172878	0.688727	8.85182	-0.216843	17.5446	-4.19914	-41.9914	17.2878	6.88727	8.85182	0.154493	-216.843	0.306211
34.211	3.821	1	1	3	0	0	-4.19762	0.0168344	0.690243	8.85001	-0.204146	17.5428	-4.19762	-41.9762	16.8344	6.90243	8.85001	0.154462	-204.146	0.306179
34.221	3.831	1	1	3	0	0	-4.1961	0.0170134	0.691765	8.85128	-0.201282	17.544	-4.1961	-41.961	17.0134	6.91765	8.85128	0.154484	-201.282	0.306201
34.232	3.842	1	1	3	0	0	-4.19404	0.0174269	0.69382	8.85214	-0.199502	17.5449	-4.19404	-41.9404	17.4269	6.9382	8.85214	0.154499	-199.502	0.306216
34.243	3.853	1	1	3	0	0	-4.19246	0.0168806	0.6954	8.8512	-0.205283	17.544	-4.19246	-41.9246	16.8806	6.954	8.8512	0.154483	-205.283	0.3062
34.254	3.864	1	1	3	0	0	-4.19018	0.0171377	0.69768	8.85385	-0.200723	17.5466	-4.19018	-41.9018	17.1377	6.9768	8.85385	0.154529	-200.723	0.306246
34.264	3.874	1	1	3	0	0	-4.18832	0.0175586	0.699541	8.84979	-0.187932	17.5425	-4.18832	-41.8832	17.5586	6.99541	8.84979	0.154458	-187.932	0.306175
34.275	3.885	1	1	3	0	0	-4.1864	0.0175682	0.70146	8.85324	-0.195692	17.546	-4.1864	-41.864	17.5682	7.0146	8.85324	0.154518	-195.692	0.306235
34.285	3.895	1	1	3	0	0	-4.1854	0.0179885	0.702462	8.8551	-0.21122	17.5479	-4.1854	-41.854	17.9885	7.02462	8.8551	0.154551	-211.22	0.306268
34.296	3.906	1	1	3	0	0	-4.18413	0.0185342	0.70373	8.85141	-0.193799	17.5442	-4.18413	-41.8413	18.5342	7.0373	8.85141	0.154486	-193.799	0.306203
34.307	3.917	1	1	3	0	0	-4.18261	0.0184797	0.705249	8.8513	-0.193812	17.5441	-4.18261	-41.8261	18.4797	7.05249	8.8513	0.154484	-193.812	0.306202
34.318	3.928	1	1	3	0	0	-4.18119	0.0188001	0.706677	8.84995	-0.194096	17.5427	-4.18119	-41.8119	18.8001	7.06677	8.84995	0.154461	-194.096	0.306178
34.328	3.938	1	1	3	0	0	-4.18041	0.0193421	0.707455	8.85414	-0.199078	17.5469	-4.18041	-41.8041	19.3421	7.07455	8.85414	0.154534	-199.078	0.306251
34.339	3.949	1	1	3	0	0	-4.17903	0.0193017	0.708827	8.84924	-0.203957	17.542	-4.17903	-41.7903	19.3017	7.08827	8.84924	0.154448	-203.957	0.306165
34.349	3.959	1	1	3	0	0	-4.17744	0.0197718	0.710423	8.85497	-0.201579	17.5477	-4.17744	-41.7744	19.7718	7.10423	8.85497	0.154548	-201.579	0.306266
34.36	3.97	1	1	3	0	0	-4.17591	0.0199703	0.711949	8.85119	-0.194613	17.5439	-4.17591	-41.7591	19.9703	7.11949	8.85119	0.154482	-194.613	0.3062
34.371	3.981	1	1	3	0	0	-4.17427	0.0205446	0.713588	8.85454	-0.191699	17.5473	-4.17427	-41.7427	20.5446	7.13588	8.85454	0.154541	-191.699	0.306258
34.382	3.992	1	1	3	0	0	-4.17296	0.0205699	0.714903	8.8491	-0.191386	17.5419	-4.17296	-41.7296	20.5699	7.14903	8.8491	0.154446	-191.386	0.306163
34.392	4.002	1	1	3	0	0	-4.17184	0.0212602	0.716024	8.85386	-0.194262	17.5466	-4.17184	-41.7184	21.2602	7.16024	8.85386	0.154529	-194.262	0.306246
34.403	4.013	1	1	3	0	0	-4.1702	0.0210993	0.717665	8.85035	-0.197039	17.5431	-4.1702	-41.702	21.0993	7.17665	8.85035	0.154468	-197.039	0.306185
34.413	4.023	1	1	3	0	0	-4.16833	0.0217353	0.719535	8.85366	-0.193787	17.5464	-4.16833	-41.6833	21.7353	7.19535	8.85366	0.154526	-193.787	0.306243
34.424	4.034	1	1	3	0	0	-4.16637	0.0221399	0.721491	8.85032	-0.193198	17.5431	-4.16637	-41.6637	22.1399	7.21491	8.85032	0.154467	-193.198	0.306184
34.435	4.045	1	1	3	0	0	-4.16473	0.0223286	0.723133	8.853	-0.191313	17.5457	-4.16473	-41.6473	22.3286	7.23133	8.853	0.154514	-191.313	0.306231
34.446	4.056	1	1	3	0	0	-4.16315	0.0227356	0.724709	8.85123	-0.195541	17.544	-4.16315	-41.6315	22.7356	7.24709	8.85123	0.154483	-195.541	0.3062
34.456	4.066	1	1	3	0	0	-4.16176	0.0229738	0.726103	8.85525	-0.200408	17.548	-4.16176	-41.6176	22.9738	7.26103	8.85525	0.154553	-200.408	0.306271
34.467	4.077	1	1	3	0	0	-4.16018	0.0230695	0.727687	8.84826	-0.18211	17.541	-4.16018	-41.6018	23.0695	7.27687	8.84826	0.154431	-182.11	0.306148
34.477	4.087	1	1	3	0	0	-4.15798	0.0237271	0.729885	8.85301	-0.188055	17.5458	-4.15798	-41.5798	23.7271	7.29885	8.85301	0.154514	-188.055	0.306231
34.488	4.098	1	1	3	0	0	-4.15617	0.0243536	0.731688	8.8494	-0.184734	17.5422	-4.15617	-41.5617	24.3536	7.31688	8.8494	0.154451	-184.734	0.306168
34.499	4.109	1	1	3	0	0	-4.15458	0.023864	0.73328	8.8558	-0.188371	17.5486	-4.15458	-41.5458	23.864	7.3328	8.8558	0.154563	-188.371	0.30628
34.51	4.12	1	1	3	0	0	-4.15273	0.0248249	0.735136	8.8498	-0.194224	17.5425	-4.15273	-41.5273	24.8249	7.35136	8.8498	0.154458	-194.224	0.306175
34.52	4.13	1	1	3	0	0	-4.15155	0.0245553	0.736315	8.85124	-0.185816	17.544	-4.15155	-41.5155	24.5553	7.36315	8.85124	0.154483	-185.816	0.3062
34.531	4.141	1	1	3	0	0	-4.15022	0.0248163	0.737638	8.85324	-0.19017	17.546	-4.15022	-41.5022	24.8163	7.37638	8.85324	0.154518	-190.17	0.306235
34.541	4.151	1	1	3	0	0	-4.14858	0.0252948	0.739279	8.85359	-0.198123	17.5463	-4.14858	-41.4858	25.2948	7.39279	8.85359	0.154524	-198.123	0.306242
34.559	4.169	1	1	3	0	0	-4.14549	0.0255626	0.742374	8.85024	-0.190538	17.543	-4.14549	-41.4549	25.5626	7.42374	8.85024	0.154466	-190.538	0.306183
34.569	4.179	1	1	3	0	0	-4.14387	0.0261694	0.743995	8.85353	-0.196623	17.5463	-4.14387	-41.4387	26.1694	7.43995	8.85353	0.154523	-196.623	0.30624
34.58	4.19	1	1	3	0	0	-4.14227	0.0263936	0.74559	8.84944	-0.187407	17.5422	-4.14227	-41.4227	26.3936	7.4559	8.84944	0.154452	-187.407	0.306169
34.59	4.2	1	1	3	0	0	-4.14008	0.0265133	0.747781	8.85573	-0.209739	17.5485	-4.14008	-41.4008	26.5133	7.47781	8.85573	0.154562	-209.739	0.306279
34.601	4.211	1	1	3	0	0	-4.13875	0.0268299	0.749113	8.85308	-0.190277	17.5458	-4.13875	-41.3875	26.8299	7.49113	8.85308	0.154515	-190.277	0.306233
34.611	4.221	1	1	3	0	0	-4.13676	0.0274421	0.751098	8.85392	-0.207753	17.5467	-4.13676	-41.3676	27.4421	7.51098	8.85392	0.15453	-207.753	0.306247
34.622	4.232	1	1	3	0	0	-4.13505	0.0270005	0.752808	8.84996	-0.20385	17.5427	-4.13505	-41.3505	27.0005	7.52808	8.84996	0.154461	-203.85	0.306178
34.633	4.243	1	1	3	0	0	-4.13383	0.0276092	0.754033	8.85182	-0.197879	17.5446	-4.13383	-41.3383	27.6092	7.54033	8.85182	0.154493	-197.879	0.30621
34.644	4.254	1	1	3	0	0	-4.13203	0.0280338	0.755837	8.85087	-0.199088	17.5436	-4.13203	-41.3203	28.0338	7.55837	8.85087	0.154477	-199.088	0.306194
34.654	4.264	1	1	3	0	0	-4.12996	0.0280101	0.757906	8.85434	-0.208816	17.5471	-4.12996	-41.2996	28.0101	7.57906	8.85434	0.154537	-208.816	0.306255
34.665	4.275	1	1	3	0	0	-4.12836	0.0283288	0.759506	8.85091	-0.194433	17.5437	-4.12836	-41.2836	28.3288	7.59506	8.85091	0.154478	-194.433	0.306195
34.675	4.285	1	1	3	0	0	-4.12602	0.0290484	0.761841	8.85125	-0.205435	17.544	-4.12602	-41.2602	29.0484	7.61841	8.85125	0.154483	-205.435	0.306201
34.686	4.296	1	1	3	0	0	-4.12394	0.0288795	0.763925	8.84873	-0.192586	17.5415	-4.12394	-41.2394	28.8795	7.63925	8.84873	0.154439	-192.586	0.306156
34.697	4.307	1	1	3	0	0	-4.12167	0.0294753	0.766196	8.85405	-0.193992	17.5468	-4.12167	-41.2167	29.4753	7.66196	8.85405	0.154532	-193.992	0.306249
34.708	4.318	1	1	3	0	0	-4.12018	0.0295976	0.767685	8.85427	-0.187615	17.547	-4.12018	-41.2018	29.5976	7.67685	8.85427	0.154536	-187.615	0.306253
34.718	4.328	1	1	3	0	0	-4.11839	0.0297733	0.769469	8.85281	-0.204342	17.5456	-4.11839	-41.1839	29.7733	7.69469	8.85281	0.154511	-204.342	0.306228
34.729	4.339	1	1	3	0	0	-4.11685	0.0298546	0.771008	8.85452	-0.203212	17.5473	-4.11685	-41.1685	29.8546	7.71008	8.85452	0.154541	-203.212	0.306258
34.74	4.35	1	1	3	0	0	-4.11534	0.030155	0.77252	8.85421	-0.193651	17.547	-4.11534	-41.1534	30.155	7.7252	8.85421	0.154535	-193.651	0.306252
34.751	4.361	1	1	3	0	0	-4.11353	0.0301567	0.774333	8.85602	-0.192908	17.5488	-4.11353	-41.1353	30.1567	7.74333	8.85602	0.154567	-192.908	0.306284
34.761	4.371	1	1	3	0	0	-4.11167	0.0306018	0.776188	8.84942	-0.188921	17.5422	-4.11167	-41.1167	30.6018	7.76188	8.84942	0.154452	-188.921	0.306169
34.772	4.382	1	1	3	0	0	-4.1097	0.0310011	0.778158	8.85061	-0.193518	17.5434	-4.1097	-41.097	31.0011	7.78158	8.85061	0.154472	-193.518	0.306189
34.782	4.392	1	1	3	0	0	-4.10817	0.0307912	0.779687	8.84973	-0.194096	17.5425	-4.10817	-41.0817	30.7912	7.79687	8.84973	0.154457	-194.096	0.306174
34.793	4.403	1	1	3	0	0	-4.10599	0.031392	0.781867	8.8493	-0.193946	17.5421	-4.10599	-41.0599	31.392	7.81867	8.8493	0.15445	-193.946	0.306167
34.804	4.414	1	1	3	0	0	-4.1043	0.0316751	0.783566	8.85058	-0.189657	17.5433	-4.1043	-41.043	31.6751	7.83566	8.85058	0.154472	-189.657	0.306189
34.815	4.425	1	1	3	0	0	-4.10249	0.03157	0.785376	8.85268	-0.199324	17.5454	-4.10249	-41.0249	31.57	7.85376	8.85268	0.154508	-199.324	0.306226
34.825	4.435	1	1	3	0	0	-4.10067	0.0318945	0.787194	8.85524	-0.193378	17.548	-4.10067	-41.0067	31.8945	7.87194	8.85524	0.154553	-193.378	0.30627
34.836	4.446	1	1	3	0	0	-4.09836	0.0324689	0.7895	8.85027	-0.196739	17.543	-4.09836	-40.9836	32.4689	7.895	8.85027	0.154466	-196.739	0.306183
34.846	4.456	1	1	3	0	0	-4.09693	0.0320809	0.790933	8.84967	-0.195809	17.5424	-4.09693	-40.9693	32.0809	7.90933	8.84967	0.154456	-195.809	0.306173
34.857	4.467	1	1	3	0	0	-4.09473	0.0328947	0.793136	8.85329	-0.204764	17.546	-4.09473	-40.9473	32.8947	7.93136	8.85329	0.154519	-204.764	0.306236
34.868	4.478	1	1	3	0	0	-4.09346	0.0329494	0.794399	8.85481	-0.202435	17.5476	-4.09346	-40.9346	32.9494	7.94399	8.85481	0.154546	-202.435	0.306263
34.879	4.489	1	1	3	0	0	-4.09184	0.0328544	0.79602	8.85116	-0.196142	17.5439	-4.09184	-40.9184	32.8544	7.9602	8.85116	0.154482	-196.142	0.306199
34.889	4.499	1	1	3	0	0	-4.09003	0.0333666	0.797832	8.85077	-0.194103	17.5435	-4.09003	-40.9003	33.3666	7.97832	8.85077	0.154475	-194.103	0.306192
34.9	4.51	1	1	3	0	0	-4.08768	0.0337918	0.800185	8.85128	-0.200795	17.544	-4.08768	-40.8768	33.7918	8.00185	8.85128	0.154484	-200.795	0.306201
34.91	4.52	1	1	3	0	0	-4.08632	0.0335524	0.801543	8.85128	-0.213061	17.544	-4.08632	-40.8632	33.5524	8.01543	8.85128	0.154484	-213.061	0.306201
34.921	4.531	1	1	3	0	0	-4.08448	0.0339	0.803385	8.84776	-0.199701	17.5405	-4.08448	-40.8448	33.9	8.03385	8.84776	0.154423	-199.701	0.30614
34.932	4.542	1	1	3	0	0	-4.08219	0.0344135	0.805677	8.85061	-0.20951	17.5434	-4.08219	-40.8219	34.4135	8.05677	8.85061	0.154472	-209.51	0.306189
34.943	4.553	1	1	3	0	0	-4.08031	0.0342741	0.807549	8.85169	-0.203351	17.5444	-4.08031	-40.8031	34.2741	8.07549	8.85169	0.154491	-203.351	0.306208
34.953	4.563	1	1	3	0	0	-4.07813	0.0349387	0.809737	8.84952	-0.201302	17.5423	-4.07813	-40.7813	34.9387	8.09737	8.84952	0.154453	-201.302	0.30617
34.964	4.574	1	1	3	0	0	-4.07673	0.0350736	0.811128	8.85504	-0.202408	17.5478	-4.07673	-40.7673	35.0736	8.11128	8.85504	0.15455	-202.408	0.306267
34.974	4.584	1	1	3	0	0	-4.07487	0.035201	0.812994	8.85051	-0.187488	17.5433	-4.07487	-40.7487	35.201	8.12994	8.85051	0.15447	-187.488	0.306188
34.985	4.595	1	1	3	0	0	-4.07284	0.0354868	0.815027	8.85221	-0.195844	17.545	-4.07284	-40.7284	35.4868	8.15027	8.85221	0.1545	-195.844	0.306217
35.002	4.612	1	1	3	0	0	-4.07053	0.0352356	0.817336	8.84671	-0.186795	17.5395	-4.07053	-40.7053	35.2356	8.17336	8.84671	0.154404	-186.795	0.306121
35.013	4.623	1	1	3	0	0	-4.06888	0.0359707	0.81898	8.85024	-0.192307	17.543	-4.06888	-40.6888	35.9707	8.1898	8.85024	0.154466	-192.307	0.306183
35.023	4.633	1	1	3	0	0	-4.06696	0.036314	0.820901	8.85253	-0.200948	17.5453	-4.06696	-40.6696	36.314	8.20901	8.85253	0.154506	-200.948	0.306223
35.034	4.644	1	1	3	0	0	-4.06517	0.0360977	0.822694	8.84996	-0.190927	17.5427	-4.06517	-40.6517	36.0977	8.22694	8.84996	0.154461	-190.927	0.306178
35.044	4.654	1	1	3	0	0	-4.0637	0.0364655	0.824166	8.85248	-0.193415	17.5452	-4.0637	-40.637	36.4655	8.24166	8.85248	0.154505	-193.415	0.306222
35.055	4.665	1	1	3	0	0	-4.06191	0.0371148	0.825955	8.8557	-0.194283	17.5485	-4.06191	-40.6191	37.1148	8.25955	8.8557	0.154561	-194.283	0.306278
35.068	4.678	1	1	3	0	0	-4.05995	0.0370501	0.827911	8.85185	-0.199423	17.5446	-4.05995	-40.5995	37.0501	8.27911	8.85185	0.154494	-199.423	0.306211
35.078	4.688	1	1	3	0	0	-4.058	0.0375471	0.829867	8.84937	-0.195712	17.5421	-4.058	-40.58	37.5471	8.29867	8.84937	0.154451	-195.712	0.306168
35.089	4.699	1	1	3	0	0	-4.05622	0.0380389	0.831641	8.85159	-0.191827	17.5443	-4.05622	-40.5622	38.0389	8.31641	8.85159	0.154489	-191.827	0.306206
35.099	4.709	1	1	3	0	0	-4.05475	0.0378035	0.833117	8.85477	-0.20772	17.5475	-4.05475	-40.5475	37.8035	8.33117	8.85477	0.154545	-207.72	0.306262
35.11	4.72	1	1	3	0	0	-4.0531	0.0381097	0.834758	8.85074	-0.195003	17.5435	-4.0531	-40.531	38.1097	8.34758	8.85074	0.154475	-195.003	0.306192
35.121	4.731	1	1	3	0	0	-4.05116	0.038718	0.836706	8.85543	-0.200121	17.5482	-4.05116	-40.5116	38.718	8.36706	8.85543	0.154556	-200.121	0.306274
35.132	4.742	1	1	3	0	0	-4.04955	0.0384439	0.838314	8.85147	-0.191614	17.5442	-4.04955	-40.4955	38.4439	8.38314	8.85147	0.154487	-191.614	0.306204
35.142	4.752	1	1	3	0	0	-4.04837	0.038627	0.839494	8.8542	-0.186065	17.547	-4.04837	-40.4837	38.627	8.39494	8.8542	0.154535	-186.065	0.306252
35.153	4.763	1	1	3	0	0	-4.04579	0.0396932	0.842077	8.84981	-0.180558	17.5426	-4.04579	-40.4579	39.6932	8.42077	8.84981	0.154458	-180.558	0.306176
35.163	4.773	1	1	3	0	0	-4.04402	0.0391664	0.843841	8.85003	-0.198618	17.5428	-4.04402	-40.4402	39.1664	8.43841	8.85003	0.154462	-198.618	0.306179
35.174	4.784	1	1	3	0	0	-4.0424	0.0397831	0.845466	8.85	-0.190056	17.5428	-4.0424	-40.424	39.7831	8.45466	8.85	0.154462	-190.056	0.306179
35.185	4.795	1	1	3	0	0	-4.04058	0.0402409	0.847284	8.85025	-0.202361	17.543	-4.04058	-40.4058	40.2409	8.47284	8.85025	0.154466	-202.361	0.306183
35.196	4.806	1	1	3	0	0	-4.03888	0.0401074	0.848981	8.85112	-0.196922	17.5439	-4.03888	-40.3888	40.1074	8.48981	8.85112	0.154481	-196.922	0.306198
35.206	4.816	1	1	3	0	0	-4.03701	0.040602	0.850856	8.85336	-0.202111	17.5461	-4.03701	-40.3701	40.602	8.50856	8.85336	0.15452	-202.111	0.306237
35.217	4.827	1	1	3	0	0	-4.03484	0.0412712	0.853025	8.8517	-0.204928	17.5445	-4.03484	-40.3484	41.2712	8.53025	8.8517	0.154491	-204.928	0.306209
35.227	4.837	1	1	3	0	0	-4.03365	0.0409298	0.854211	8.85205	-0.199712	17.5448	-4.03365	-40.3365	40.9298	8.54211	8.85205	0.154497	-199.712	0.306215
35.238	4.848	1	1	3	0	0	-4.03208	0.0411697	0.855779	8.85628	-0.212084	17.549	-4.03208	-40.3208	41.1697	8.55779	8.85628	0.154571	-212.084	0.306289
35.249	4.859	1	1	3	0	0	-4.0302	0.0418355	0.857666	8.84946	-0.192996	17.5422	-4.0302	-40.302	41.8355	8.57666	8.84946	0.154452	-192.996	0.306169
35.26	4.87	1	1	3	0	0	-4.02899	0.0412823	0.858876	8.85245	-0.19236	17.5452	-4.02899	-40.2899	41.2823	8.58876	8.85245	0.154504	-192.36	0.306222
35.27	4.88	1	1	3	0	0	-4.02709	0.042093	0.860768	8.85424	-0.208106	17.547	-4.02709	-40.2709	42.093	8.60768	8.85424	0.154536	-208.106	0.306253
35.281	4.891	1	1	3	0	0	-4.02434	0.0425908	0.863524	8.85078	-0.202438	17.5435	-4.02434	-40.2434	42.5908	8.63524	8.85078	0.154475	-202.438	0.306192
35.291	4.901	1	1	3	0	0	-4.02306	0.042525	0.864798	8.85632	-0.203989	17.5491	-4.02306	-40.2306	42.525	8.64798	8.85632	0.154572	-203.989	0.306289
35.302	4.912	1	1	3	0	0	-4.02146	0.0426838	0.866404	8.85183	-0.189864	17.5446	-4.02146	-40.2146	42.6838	8.66404	8.85183	0.154494	-189.864	0.306211
35.313	4.923	1	1	3	0	0	-4.01918	0.04347	0.868683	8.85224	-0.188568	17.545	-4.01918	-40.1918	43.47	8.68683	8.85224	0.154501	-188.568	0.306218
35.325	4.935	1	1	3	0	0	-4.01693	0.0432752	0.870933	8.85571	-0.205463	17.5485	-4.01693	-40.1693	43.2752	8.70933	8.85571	0.154561	-205.463	0.306278
35.336	4.946	1	1	3	0	0	-4.01502	0.0437446	0.872839	8.84997	-0.192749	17.5427	-4.01502	-40.1502	43.7446	8.72839	8.84997	0.154461	-192.749	0.306178
35.346	4.956	1	1	3	0	0	-4.01348	0.0440878	0.874387	8.85087	-0.213852	17.5436	-4.01348	-40.1348	44.0878	8.74387	8.85087	0.154477	-213.852	0.306194
35.357	4.967	1	1	3	0	0	-4.01202	0.0439253	0.875846	8.85195	-0.207355	17.5447	-4.01202	-40.1202	43.9253	8.75846	8.85195	0.154496	-207.355	0.306213
35.368	4.978	1	1	3	0	0	-4.0102	0.044581	0.877661	8.85363	-0.207949	17.5464	-4.0102	-40.102	44.581	8.77661	8.85363	0.154525	-207.949	0.306242
35.379	4.989	1	1	3	0	0	-4.00816	0.0448277	0.879702	8.85061	-0.198972	17.5434	-4.00816	-40.0816	44.8277	8.79702	8.85061	0.154472	-198.972	0.306189
35.389	4.999	1	1	3	0	0	-4.00673	0.0446722	0.881135	8.85361	-0.191977	17.5464	-4.00673	-40.0673	44.6722	8.81135	8.85361	0.154525	-191.977	0.306242
35.4	5.01	1	1	3	0	0	-4.00476	0.0452043	0.883099	8.85084	-0.190028	17.5436	-4.00476	-40.0476	45.2043	8.83099	8.85084	0.154476	-190.028	0.306194
35.41	5.02	1	1	3	0	0	-4.00327	0.0458007	0.884594	8.84908	-0.196376	17.5418	-4.00327	-40.0327	45.8007	8.84594	8.84908	0.154446	-196.376	0.306163
35.421	5.031	1	1	3	0	0	-4.00127	0.045718	0.886589	8.85477	-0.198365	17.5475	-4.00127	-40.0127	45.718	8.86589	8.85477	0.154545	-198.365	0.306262
35.432	5.042	1	1	3	0	0	-3.9995	0.0462301	0.888365	8.85689	-0.199787	17.5496	-3.9995	-39.995	46.2301	8.88365	8.85689	0.154582	-199.787	0.306299
35.443	5.053	1	1	3	0	0	-3.99795	0.0465814	0.88991	8.85008	-0.199535	17.5428	-3.99795	-39.9795	46.5814	8.8991	8.85008	0.154463	-199.535	0.30618
35.453	5.063	1	1	3	0	0	-3.99579	0.0465623	0.892071	8.85168	-0.194463	17.5444	-3.99579	-39.9579	46.5623	8.92071	8.85168	0.154491	-194.463	0.306208
35.464	5.074	1	1	3	0	0	-3.9942	0.046801	0.89366	8.85417	-0.201834	17.5469	-3.9942	-39.942	46.801	8.9366	8.85417	0.154534	-201.834	0.306252
35.474	5.084	1	1	3	0	0	-3.99271	0.0474616	0.895152	8.85404	-0.184079	17.5468	-3.99271	-39.9271	47.4616	8.95152	8.85404	0.154532	-184.079	0.306249
35.485	5.095	1	1	3	0	0	-3.99099	0.0472705	0.896875	8.8568	-0.195902	17.5496	-3.99099	-39.9099	47.2705	8.96875	8.8568	0.15458	-195.902	0.306298
35.496	5.106	1	1	3	0	0	-3.98903	0.0476845	0.89883	8.85275	-0.186768	17.5455	-3.98903	-39.8903	47.6845	8.9883	8.85275	0.15451	-186.768	0.306227
35.507	5.117	1	1	3	0	0	-3.98759	0.0480449	0.900272	8.85279	-0.200236	17.5455	-3.98759	-39.8759	48.0449	9.00272	8.85279	0.15451	-200.236	0.306227
35.517	5.127	1	1	3	0	0	-3.98547	0.0480993	0.902396	8.85577	-0.200824	17.5485	-3.98547	-39.8547	48.0993	9.02396	8.85577	0.154562	-200.824	0.30628
35.528	5.138	1	1	3	0	0	-3.98308	0.0489101	0.904777	8.84992	-0.18999	17.5427	-3.98308	-39.8308	48.9101	9.04777	8.84992	0.15446	-189.99	0.306177
35.538	5.148	1	1	3	0	0	-3.98132	0.0491183	0.906541	8.85564	-0.19813	17.5484	-3.98132	-39.8132	49.1183	9.06541	8.85564	0.15456	-198.13	0.306277
35.549	5.159	1	1	3	0	0	-3.98021	0.0489509	0.907656	8.84981	-0.182342	17.5426	-3.98021	-39.8021	48.9509	9.07656	8.84981	0.154458	-182.342	0.306176
35.56	5.17	1	1	3	0	0	-3.97862	0.0493996	0.909242	8.8554	-0.194935	17.5481	-3.97862	-39.7862	49.3996	9.09242	8.8554	0.154556	-194.935	0.306273
35.571	5.181	1	1	3	0	0	-3.97634	0.0499179	0.911519	8.85202	-0.197368	17.5448	-3.97634	-39.7634	49.9179	9.11519	8.85202	0.154497	-197.368	0.306214
35.581	5.191	1	1	3	0	0	-3.9752	0.049573	0.91266	8.85449	-0.194261	17.5472	-3.9752	-39.752	49.573	9.1266	8.85449	0.15454	-194.261	0.306257
35.592	5.202	1	1	3	0	0	-3.97343	0.0500083	0.914435	8.84815	-0.197314	17.5409	-3.97343	-39.7343	50.0083	9.14435	8.84815	0.154429	-197.314	0.306146
35.602	5.212	1	1	3	0	0	-3.97142	0.0504174	0.916438	8.85491	-0.1879	17.5477	-3.97142	-39.7142	50.4174	9.16438	8.85491	0.154547	-187.9	0.306264
35.613	5.223	1	1	3	0	0	-3.96925	0.0508794	0.918616	8.85226	-0.186892	17.545	-3.96925	-39.6925	50.8794	9.18616	8.85226	0.154501	-186.892	0.306218
35.624	5.234	1	1	3	0	0	-3.96712	0.0511576	0.920741	8.8519	-0.190273	17.5447	-3.96712	-39.6712	51.1576	9.20741	8.8519	0.154495	-190.273	0.306212
35.635	5.245	1	1	3	0	0	-3.96568	0.0516927	0.922184	8.8499	-0.197875	17.5427	-3.96568	-39.6568	51.6927	9.22184	8.8499	0.15446	-197.875	0.306177
35.645	5.255	1	1	3	0	0	-3.96449	0.0513372	0.923375	8.85533	-0.206879	17.5481	-3.96449	-39.6449	51.3372	9.23375	8.85533	0.154555	-206.879	0.306272
35.656	5.266	1	1	3	0	0	-3.96269	0.0517447	0.925168	8.84779	-0.202649	17.5405	-3.96269	-39.6269	51.7447	9.25168	8.84779	0.154423	-202.649	0.30614
35.666	5.276	1	1	3	0	0	-3.96112	0.0520254	0.926739	8.85439	-0.18699	17.5471	-3.96112	-39.6112	52.0254	9.26739	8.85439	0.154538	-186.99	0.306255
35.677	5.287	1	1	3	0	0	-3.95905	0.0521352	0.928809	8.85523	-0.197793	17.548	-3.95905	-39.5905	52.1352	9.28809	8.85523	0.154553	-197.793	0.30627
35.688	5.298	1	1	3	0	0	-3.95699	0.0527228	0.930874	8.8518	-0.200005	17.5446	-3.95699	-39.5699	52.7228	9.30874	8.8518	0.154493	-200.005	0.30621
35.699	5.309	1	1	3	0	0	-3.95536	0.0529699	0.932507	8.85646	-0.202259	17.5492	-3.95536	-39.5536	52.9699	9.32507	8.85646	0.154574	-202.259	0.306292
35.711	5.321	1	1	3	0	0	-3.95342	0.0530149	0.934439	8.84856	-0.196241	17.5413	-3.95342	-39.5342	53.0149	9.34439	8.84856	0.154437	-196.241	0.306154
35.721	5.331	1	1	3	0	0	-3.95204	0.0532971	0.935822	8.84861	-0.201251	17.5414	-3.95204	-39.5204	53.2971	9.35822	8.84861	0.154437	-201.251	0.306155
35.732	5.342	1	1	3	0	0	-3.95006	0.0537112	0.937804	8.85157	-0.20291	17.5443	-3.95006	-39.5006	53.7112	9.37804	8.85157	0.154489	-202.91	0.306206
35.743	5.353	1	1	3	0	0	-3.94804	0.0538229	0.939819	8.85068	-0.201149	17.5434	-3.94804	-39.4804	53.8229	9.39819	8.85068	0.154474	-201.149	0.306191
35.754	5.364	1	1	3	0	0	-3.94618	0.0542552	0.941678	8.8536	-0.192751	17.5464	-3.94618	-39.4618	54.2552	9.41678	8.8536	0.154525	-192.751	0.306242
35.764	5.374	1	1	3	0	0	-3.94456	0.0543881	0.943303	8.85537	-0.205289	17.5481	-3.94456	-39.4456	54.3881	9.43303	8.85537	0.154555	-205.289	0.306273
35.775	5.385	1	1	3	0	0	-3.94246	0.0545622	0.945398	8.85066	-0.190606	17.5434	-3.94246	-39.4246	54.5622	9.45398	8.85066	0.154473	-190.606	0.30619
35.785	5.395	1	1	3	0	0	-3.94141	0.0549622	0.946456	8.8514	-0.204082	17.5442	-3.94141	-39.4141	54.9622	9.46456	8.8514	0.154486	-204.082	0.306203
35.796	5.406	1	1	3	0	0	-3.93956	0.0549296	0.948298	8.84891	-0.196913	17.5417	-3.93956	-39.3956	54.9296	9.48298	8.84891	0.154443	-196.913	0.30616
35.807	5.417	1	1	3	0	0	-3.93781	0.0553123	0.95005	8.85178	-0.200338	17.5445	-3.93781	-39.3781	55.3123	9.5005	8.85178	0.154493	-200.338	0.30621
35.818	5.428	1	1	3	0	0	-3.93537	0.055909	0.952493	8.84963	-0.199191	17.5424	-3.93537	-39.3537	55.909	9.52493	8.84963	0.154455	-199.191	0.306172
35.828	5.438	1	1	3	0	0	-3.93393	0.0559095	0.953928	8.85112	-0.200897	17.5439	-3.93393	-39.3393	55.9095	9.53928	8.85112	0.154481	-200.897	0.306198
35.839	5.449	1	1	3	0	0	-3.93155	0.0561563	0.956309	8.85177	-0.202601	17.5445	-3.93155	-39.3155	56.1563	9.56309	8.85177	0.154493	-202.601	0.30621
35.849	5.459	1	1	3	0	0	-3.92984	0.0568012	0.958022	8.85478	-0.199069	17.5475	-3.92984	-39.2984	56.8012	9.58022	8.85478	0.154545	-199.069	0.306262
35.86	5.47	1	1	3	0	0	-3.92847	0.0567893	0.959392	8.85038	-0.191962	17.5431	-3.92847	-39.2847	56.7893	9.59392	8.85038	0.154468	-191.962	0.306186
35.871	5.481	1	1	3	0	0	-3.92707	0.0567519	0.960794	8.85209	-0.185548	17.5448	-3.92707	-39.2707	56.7519	9.60794	8.85209	0.154498	-185.548	0.306215
35.882	5.492	1	1	3	0	0	-3.92527	0.0570363	0.96259	8.85474	-0.192755	17.5475	-3.92527	-39.2527	57.0363	9.6259	8.85474	0.154544	-192.755	0.306262
35.892	5.502	1	1	3	0	0	-3.92326	0.0574272	0.964605	8.8486	-0.189871	17.5414	-3.92326	-39.2326	57.4272	9.64605	8.8486	0.154437	-189.871	0.306154
35.903	5.513	1	1	3	0	0	-3.92159	0.0575867	0.966273	8.85213	-0.195279	17.5449	-3.92159	-39.2159	57.5867	9.66273	8.85213	0.154499	-195.279	0.306216
35.913	5.523	1	1	3	0	0	-3.91935	0.058201	0.968508	8.85493	-0.205139	17.5477	-3.91935	-39.1935	58.201	9.68508	8.85493	0.154548	-205.139	0.306265
35.924	5.534	1	1	3	0	0	-3.91724	0.0583352	0.970619	8.84819	-0.20222	17.5409	-3.91724	-39.1724	58.3352	9.70619	8.84819	0.15443	-202.22	0.306147
35.935	5.545	1	1	3	0	0	-3.91553	0.058465	0.972329	8.85182	-0.196649	17.5446	-3.91553	-39.1553	58.465	9.72329	8.85182	0.154493	-196.649	0.306211
35.946	5.556	1	1	3	0	0	-3.91373	0.0586597	0.974137	8.85152	-0.202851	17.5443	-3.91373	-39.1373	58.6597	9.74137	8.85152	0.154488	-202.851	0.306205
35.956	5.566	1	1	3	0	0	-3.91178	0.0589266	0.976084	8.8494	-0.210452	17.5422	-3.91178	-39.1178	58.9266	9.76084	8.8494	0.154451	-210.452	0.306168
35.967	5.577	1	1	3	0	0	-3.91041	0.0589177	0.977451	8.85352	-0.211371	17.5463	-3.91041	-39.1041	58.9177	9.77451	8.85352	0.154523	-211.371	0.30624
35.977	5.587	1	1	3	0	0	-3.90839	0.0593772	0.979468	8.85669	-0.199791	17.5494	-3.90839	-39.0839	59.3772	9.79468	8.85669	0.154578	-199.791	0.306296
35.988	5.598	1	1	3	0	0	-3.90657	0.0594823	0.981287	8.8509	-0.197007	17.5437	-3.90657	-39.0657	59.4823	9.81287	8.8509	0.154477	-197.007	0.306195
35.999	5.609	1	1	3	0	0	-3.90469	0.0595826	0.983177	8.85198	-0.200001	17.5447	-3.90469	-39.0469	59.5826	9.83177	8.85198	0.154496	-200.001	0.306213
36.01	5.62	1	1	3	0	0	-3.90287	0.060054	0.984996	8.85443	-0.203005	17.5472	-3.90287	-39.0287	60.054	9.84996	8.85443	0.154539	-203.005	0.306256
36.02	5.63	1	1	3	0	0	-3.90163	0.0599542	0.986236	8.8526	-0.204626	17.5454	-3.90163	-39.0163	59.9542	9.86236	8.8526	0.154507	-204.626	0.306224
36.031	5.641	1	1	3	0	0	-3.89952	0.060403	0.988345	8.85162	-0.197467	17.5444	-3.89952	-38.9952	60.403	9.88345	8.85162	0.15449	-197.467	0.306207
36.041	5.651	1	1	3	0	0	-3.89807	0.060471	0.989797	8.85058	-0.210645	17.5433	-3.89807	-38.9807	60.471	9.89797	8.85058	0.154472	-210.645	0.306189
36.052	5.662	1	1	3	0	0	-3.89597	0.0606525	0.991889	8.8528	-0.202293	17.5456	-3.89597	-38.9597	60.6525	9.91889	8.8528	0.154511	-202.293	0.306228
36.063	5.673	1	1	3	0	0	-3.89343	0.0613228	0.994433	8.85252	-0.209836	17.5453	-3.89343	-38.9343	61.3228	9.94433	8.85252	0.154506	-209.836	0.306223
36.074	5.684	1	1	3	0	0	-3.89223	0.0611747	0.995628	8.85164	-0.207654	17.5444	-3.89223	-38.9223	61.1747	9.95628	8.85164	0.15449	-207.654	0.306207
36.084	5.694	1	1	3	0	0	-3.89044	0.0612863	0.997421	8.85077	-0.194388	17.5435	-3.89044	-38.9044	61.2863	9.97421	8.85077	0.154475	-194.388	0.306192
36.095	5.705	1	1	3	0	0	-3.88828	0.0616842	0.999583	8.85355	-0.196124	17.5463	-3.88828	-38.8828	61.6842	9.99583	8.85355	0.154524	-196.124	0.306241
36.105	5.715	1	1	3	0	0	-3.8866	0.0619839	1.00126	8.8498	-0.191889	17.5425	-3.8866	-38.866	61.9839	10.0126	8.8498	0.154458	-191.889	0.306175
36.116	5.726	1	1	3	0	0	-3.88482	0.0617959	1.00304	8.85082	-0.202072	17.5436	-3.88482	-38.8482	61.7959	10.0304	8.85082	0.154476	-202.072	0.306193
36.127	5.737	1	1	3	0	0	-3.88296	0.061818	1.00491	8.8534	-0.195938	17.5462	-3.88296	-38.8296	61.818	10.0491	8.8534	0.154521	-195.938	0.306238
36.138	5.748	1	1	3	0	0	-3.88125	0.0623493	1.00661	8.85617	-0.193512	17.5489	-3.88125	-38.8125	62.3493	10.0661	8.85617	0.154569	-193.512	0.306286
36.148	5.758	1	1	3	0	0	-3.8795	0.0622264	1.00836	8.85226	-0.204109	17.545	-3.8795	-38.795	62.2264	10.0836	8.85226	0.154501	-204.109	0.306218
36.159	5.769	1	1	3	0	0	-3.87692	0.0627301	1.01094	8.85429	-0.210735	17.547	-3.87692	-38.7692	62.7301	10.1094	8.85429	0.154536	-210.735	0.306254
36.169	5.779	1	1	3	0	0	-3.87595	0.0626536	1.01191	8.85445	-0.199905	17.5472	-3.87595	-38.7595	62.6536	10.1191	8.85445	0.154539	-199.905	0.306256
36.18	5.79	1	1	3	0	0	-3.87408	0.0624312	1.01378	8.84981	-0.199354	17.5426	-3.87408	-38.7408	62.4312	10.1378	8.84981	0.154458	-199.354	0.306175
36.191	5.801	1	1	3	0	0	-3.8719	0.0631718	1.01596	8.85331	-0.199209	17.5461	-3.8719	-38.719	63.1718	10.1596	8.85331	0.154519	-199.209	0.306237
36.202	5.812	1	1	3	0	0	-3.86973	0.0633724	1.01814	8.85381	-0.199496	17.5466	-3.86973	-38.6973	63.3724	10.1814	8.85381	0.154528	-199.496	0.306245
36.212	5.822	1	1	3	0	0	-3.86818	0.0633815	1.01968	8.85339	-0.192223	17.5461	-3.86818	-38.6818	63.3815	10.1968	8.85339	0.154521	-192.223	0.306238
36.223	5.833	1	1	3	0	0	-3.86649	0.0634156	1.02138	8.84903	-0.183873	17.5418	-3.86649	-38.6649	63.4156	10.2138	8.84903	0.154445	-183.873	0.306162
36.233	5.843	1	1	3	0	0	-3.86446	0.0638902	1.0234	8.8539	-0.188611	17.5467	-3.86446	-38.6446	63.8902	10.234	8.8539	0.15453	-188.611	0.306247
36.244	5.854	1	1	3	0	0	-3.86293	0.0637058	1.02493	8.85426	-0.191694	17.547	-3.86293	-38.6293	63.7058	10.2493	8.85426	0.154536	-191.694	0.306253
36.255	5.865	1	1	3	0	0	-3.86088	0.0639325	1.02698	8.849	-0.1917	17.5418	-3.86088	-38.6088	63.9325	10.2698	8.849	0.154444	-191.7	0.306161
36.266	5.876	1	1	3	0	0	-3.85915	0.064168	1.02871	8.85492	-0.19887	17.5477	-3.85915	-38.5915	64.168	10.2871	8.85492	0.154548	-198.87	0.306265
36.276	5.886	1	1	3	0	0	-3.85712	0.0640348	1.03074	8.84894	-0.185182	17.5417	-3.85712	-38.5712	64.0348	10.3074	8.84894	0.154443	-185.182	0.30616
36.287	5.897	1	1	3	0	0	-3.85573	0.0642841	1.03214	8.85174	-0.186508	17.5445	-3.85573	-38.5573	64.2841	10.3214	8.85174	0.154492	-186.508	0.306209
36.297	5.907	1	1	3	0	0	-3.85399	0.0646089	1.03387	8.85339	-0.191153	17.5461	-3.85399	-38.5399	64.6089	10.3387	8.85339	0.154521	-191.153	0.306238
36.308	5.918	1	1	3	0	0	-3.85183	0.0644383	1.03603	8.85042	-0.180192	17.5432	-3.85183	-38.5183	64.4383	10.3603	8.85042	0.154469	-180.192	0.306186
36.328	5.938	1	1	3	0	0	-3.84912	0.0649752	1.03875	8.84883	-0.215652	17.5416	-3.84912	-38.4912	64.9752	10.3875	8.84883	0.154441	-215.652	0.306158
36.342	5.952	1	1	3	0	0	-3.84601	0.0649227	1.04185	8.84773	-0.205156	17.5405	-3.84601	-38.4601	64.9227	10.4185	8.84773	0.154422	-205.156	0.306139
36.352	5.962	1	1	3	0	0	-3.84481	0.0652118	1.04305	8.85503	-0.19387	17.5478	-3.84481	-38.4481	65.2118	10.4305	8.85503	0.15455	-193.87	0.306267
36.363	5.973	1	1	3	0	0	-3.84329	0.065121	1.04457	8.85011	-0.204979	17.5429	-3.84329	-38.4329	65.121	10.4457	8.85011	0.154464	-204.979	0.306181
36.374	5.984	1	1	3	0	0	-3.84088	0.0651615	1.04698	8.8553	-0.199712	17.5481	-3.84088	-38.4088	65.1615	10.4698	8.8553	0.154554	-199.712	0.306271
36.385	5.995	1	1	3	0	0	-3.8387	0.0653649	1.04916	8.85171	-0.212318	17.5445	-3.8387	-38.387	65.3649	10.4916	8.85171	0.154492	-212.318	0.306209
36.395	6.005	1	1	3	0	0	-3.83669	0.0657494	1.05117	8.85062	-0.190833	17.5434	-3.83669	-38.3669	65.7494	10.5117	8.85062	0.154473	-190.833	0.30619
36.406	6.016	1	1	3	0	0	-3.83535	0.0653523	1.05252	8.85061	-0.189792	17.5434	-3.83535	-38.3535	65.3523	10.5252	8.85061	0.154472	-189.792	0.306189
36.416	6.026	1	1	3	0	0	-3.83346	0.0655873	1.05441	8.85635	-0.212163	17.5491	-3.83346	-38.3346	65.5873	10.5441	8.85635	0.154572	-212.163	0.30629
36.427	6.037	1	1	3	0	0	-3.83154	0.0658233	1.05633	8.85193	-0.19746	17.5447	-3.83154	-38.3154	65.8233	10.5633	8.85193	0.154495	-197.46	0.306212
36.438	6.048	1	1	3	0	0	-3.82935	0.0657036	1.05851	8.85216	-0.198765	17.5449	-3.82935	-38.2935	65.7036	10.5851	8.85216	0.154499	-198.765	0.306216
36.449	6.059	1	1	3	0	0	-3.82698	0.0661008	1.06088	8.84963	-0.192983	17.5424	-3.82698	-38.2698	66.1008	10.6088	8.84963	0.154455	-192.983	0.306172
36.459	6.069	1	1	3	0	0	-3.82565	0.0660983	1.06222	8.85261	-0.199909	17.5454	-3.82565	-38.2565	66.0983	10.6222	8.85261	0.154507	-199.909	0.306224
36.47	6.08	1	1	3	0	0	-3.82406	0.065749	1.06381	8.85192	-0.206692	17.5447	-3.82406	-38.2406	65.749	10.6381	8.85192	0.154495	-206.692	0.306212
36.48	6.09	1	1	3	0	0	-3.82226	0.0660545	1.0656	8.85207	-0.189319	17.5448	-3.82226	-38.2226	66.0545	10.656	8.85207	0.154498	-189.319	0.306215
36.491	6.101	1	1	3	0	0	-3.82022	0.0665069	1.06764	8.85218	-0.194594	17.5449	-3.82022	-38.2022	66.5069	10.6764	8.85218	0.1545	-194.594	0.306217
36.502	6.112	1	1	3	0	0	-3.81853	0.0660992	1.06933	8.85358	-0.203293	17.5463	-3.81853	-38.1853	66.0992	10.6933	8.85358	0.154524	-203.293	0.306241
36.513	6.123	1	1	3	0	0	-3.81727	0.0662115	1.07059	8.85273	-0.198048	17.5455	-3.81727	-38.1727	66.2115	10.7059	8.85273	0.154509	-198.048	0.306227
36.523	6.133	1	1	3	0	0	-3.81555	0.0664918	1.07231	8.85508	-0.19523	17.5478	-3.81555	-38.1555	66.4918	10.7231	8.85508	0.15455	-195.23	0.306267
36.534	6.144	1	1	3	0	0	-3.81366	0.0666314	1.0742	8.85585	-0.195391	17.5486	-3.81366	-38.1366	66.6314	10.742	8.85585	0.154564	-195.391	0.306281
36.544	6.154	1	1	3	0	0	-3.81222	0.0667013	1.07564	8.85361	-0.189498	17.5464	-3.81222	-38.1222	66.7013	10.7564	8.85361	0.154525	-189.498	0.306242
36.555	6.165	1	1	3	0	0	-3.81016	0.0672989	1.0777	8.85057	-0.194971	17.5433	-3.81016	-38.1016	67.2989	10.777	8.85057	0.154472	-194.971	0.306189
36.566	6.176	1	1	3	0	0	-3.80852	0.06694	1.07934	8.85124	-0.192135	17.544	-3.80852	-38.0852	66.94	10.7934	8.85124	0.154483	-192.135	0.306201
36.577	6.187	1	1	3	0	0	-3.80692	0.0672965	1.08094	8.855	-0.193766	17.5478	-3.80692	-38.0692	67.2965	10.8094	8.855	0.154549	-193.766	0.306266
36.587	6.197	1	1	3	0	0	-3.80533	0.0676402	1.08254	8.85003	-0.199461	17.5428	-3.80533	-38.0533	67.6402	10.8254	8.85003	0.154462	-199.461	0.30618
36.605	6.215	1	1	3	0	0	-3.80201	0.0678517	1.08586	8.84915	-0.185443	17.5419	-3.80201	-38.0201	67.8517	10.8586	8.84915	0.154447	-185.443	0.306164
36.616	6.226	1	1	3	0	0	-3.79991	0.0681817	1.08796	8.85036	-0.184101	17.5431	-3.79991	-37.9991	68.1817	10.8796	8.85036	0.154468	-184.101	0.306185
36.627	6.237	1	1	3	0	0	-3.79854	0.0678595	1.08932	8.85303	-0.184073	17.5458	-3.79854	-37.9854	67.8595	10.8932	8.85303	0.154515	-184.073	0.306232
36.638	6.248	1	1	3	0	0	-3.79655	0.0682553	1.09132	8.85567	-0.19797	17.5484	-3.79655	-37.9655	68.2553	10.9132	8.85567	0.154561	-197.97	0.306278
36.648	6.258	1	1	3	0	0	-3.79511	0.0685224	1.09275	8.85643	-0.19827	17.5492	-3.79511	-37.9511	68.5224	10.9275	8.85643	0.154574	-198.27	0.306291
36.659	6.269	1	1	3	0	0	-3.79319	0.0683651	1.09468	8.84883	-0.190704	17.5416	-3.79319	-37.9319	68.3651	10.9468	8.84883	0.154441	-190.704	0.306158
36.669	6.279	1	1	3	0	0	-3.79165	0.0687546	1.09621	8.85608	-0.206579	17.5488	-3.79165	-37.9165	68.7546	10.9621	8.85608	0.154568	-206.579	0.306285
36.68	6.29	1	1	3	0	0	-3.7899	0.0689572	1.09796	8.85338	-0.20182	17.5461	-3.7899	-37.899	68.9572	10.9796	8.85338	0.154521	-201.82	0.306238
36.691	6.301	1	1	3	0	0	-3.78808	0.0689361	1.09978	8.85396	-0.201591	17.5467	-3.78808	-37.8808	68.9361	10.9978	8.85396	0.154531	-201.591	0.306248
36.702	6.312	1	1	3	0	0	-3.78608	0.0693136	1.10178	8.85383	-0.204897	17.5466	-3.78608	-37.8608	69.3136	11.0178	8.85383	0.154529	-204.897	0.306246
36.712	6.322	1	1	3	0	0	-3.78428	0.0695182	1.10358	8.85055	-0.183544	17.5433	-3.78428	-37.8428	69.5182	11.0358	8.85055	0.154471	-183.544	0.306188
36.723	6.333	1	1	3	0	0	-3.78261	0.0691442	1.10525	8.8537	-0.200033	17.5465	-3.78261	-37.8261	69.1442	11.0525	8.8537	0.154526	-200.033	0.306243
36.733	6.343	1	1	3	0	0	-3.78048	0.0697983	1.10739	8.85325	-0.198919	17.546	-3.78048	-37.8048	69.7983	11.0739	8.85325	0.154518	-198.919	0.306236
36.744	6.354	1	1	3	0	0	-3.77852	0.0703581	1.10935	8.8513	-0.192015	17.5441	-3.77852	-37.7852	70.3581	11.0935	8.8513	0.154484	-192.015	0.306201
36.755	6.365	1	1	3	0	0	-3.77674	0.0697598	1.11112	8.85217	-0.196837	17.5449	-3.77674	-37.7674	69.7598	11.1112	8.85217	0.1545	-196.837	0.306217
36.766	6.376	1	1	3	0	0	-3.77544	0.0698624	1.11243	8.85412	-0.203986	17.5469	-3.77544	-37.7544	69.8624	11.1243	8.85412	0.154534	-203.986	0.306251
36.776	6.386	1	1	3	0	0	-3.77349	0.0701838	1.11437	8.85547	-0.183002	17.5482	-3.77349	-37.7349	70.1838	11.1437	8.85547	0.154557	-183.002	0.306274
36.787	6.397	1	1	3	0	0	-3.77199	0.069893	1.11587	8.85297	-0.184499	17.5457	-3.77199	-37.7199	69.893	11.1587	8.85297	0.154514	-184.499	0.306231
36.797	6.407	1	1	3	0	0	-3.77018	0.0702691	1.11769	8.8533	-0.19833	17.5461	-3.77018	-37.7018	70.2691	11.1769	8.8533	0.154519	-198.33	0.306236
36.808	6.418	1	1	3	0	0	-3.76835	0.0706053	1.11951	8.85541	-0.209019	17.5482	-3.76835	-37.6835	70.6053	11.1951	8.85541	0.154556	-209.019	0.306273
36.819	6.429	1	1	3	0	0	-3.76665	0.0702751	1.12122	8.85217	-0.207081	17.5449	-3.76665	-37.6665	70.2751	11.2122	8.85217	0.1545	-207.081	0.306217
36.83	6.44	1	1	3	0	0	-3.7643	0.0711282	1.12356	8.85119	-0.200876	17.5439	-3.7643	-37.643	71.1282	11.2356	8.85119	0.154482	-200.876	0.3062
36.843	6.453	1	1	3	0	0	-3.76247	0.0709908	1.1254	8.85289	-0.195736	17.5456	-3.76247	-37.6247	70.9908	11.254	8.85289	0.154512	-195.736	0.306229
36.854	6.464	1	1	3	0	0	-3.76109	0.0707574	1.12677	8.8554	-0.209002	17.5482	-3.76109	-37.6109	70.7574	11.2677	8.8554	0.154556	-209.002	0.306273
36.864	6.474	1	1	3	0	0	-3.75935	0.0710588	1.12851	8.85557	-0.193371	17.5483	-3.75935	-37.5935	71.0588	11.2851	8.85557	0.154559	-193.371	0.306276
36.875	6.485	1	1	3	0	0	-3.7569	0.0716337	1.13097	8.8501	-0.200695	17.5429	-3.7569	-37.569	71.6337	11.3097	8.8501	0.154463	-200.695	0.306181
36.886	6.496	1	1	3	0	0	-3.75519	0.0713279	1.13268	8.85361	-0.200609	17.5464	-3.75519	-37.5519	71.3279	11.3268	8.85361	0.154525	-200.609	0.306242
36.897	6.507	1	1	3	0	0	-3.75263	0.0718797	1.13524	8.85494	-0.212376	17.5477	-3.75263	-37.5263	71.8797	11.3524	8.85494	0.154548	-212.376	0.306265
36.907	6.517	1	1	3	0	0	-3.75124	0.071973	1.13662	8.85411	-0.199218	17.5469	-3.75124	-37.5124	71.973	11.3662	8.85411	0.154533	-199.218	0.306251
36.918	6.528	1	1	3	0	0	-3.74963	0.0714009	1.13823	8.85583	-0.204251	17.5486	-3.74963	-37.4963	71.4009	11.3823	8.85583	0.154563	-204.251	0.30628
36.929	6.539	1	1	3	0	0	-3.74764	0.0720667	1.14022	8.85427	-0.20169	17.547	-3.74764	-37.4764	72.0667	11.4022	8.85427	0.154536	-201.69	0.306253
36.94	6.55	1	1	3	0	0	-3.74588	0.0721043	1.14198	8.85662	-0.205027	17.5494	-3.74588	-37.4588	72.1043	11.4198	8.85662	0.154577	-205.027	0.306294
36.95	6.56	1	1	3	0	0	-3.74421	0.0718518	1.14366	8.85056	-0.186586	17.5433	-3.74421	-37.4421	71.8518	11.4366	8.85056	0.154471	-186.586	0.306189
36.961	6.571	1	1	3	0	0	-3.74204	0.0721917	1.14582	8.85269	-0.19642	17.5454	-3.74204	-37.4204	72.1917	11.4582	8.85269	0.154509	-196.42	0.306226
36.971	6.581	1	1	3	0	0	-3.74045	0.0725318	1.14741	8.85612	-0.204724	17.5489	-3.74045	-37.4045	72.5318	11.4741	8.85612	0.154568	-204.724	0.306286
36.982	6.592	1	1	3	0	0	-3.7388	0.0720877	1.14906	8.85091	-0.210426	17.5437	-3.7388	-37.388	72.0877	11.4906	8.85091	0.154478	-210.426	0.306195
36.993	6.603	1	1	3	0	0	-3.73695	0.0726175	1.15091	8.85497	-0.197577	17.5477	-3.73695	-37.3695	72.6175	11.5091	8.85497	0.154548	-197.577	0.306266
37.004	6.614	1	1	3	0	0	-3.73567	0.0726534	1.15219	8.85143	-0.194307	17.5442	-3.73567	-37.3567	72.6534	11.5219	8.85143	0.154487	-194.307	0.306204
37.014	6.624	1	1	3	0	0	-3.73385	0.0724861	1.15401	8.85258	-0.197102	17.5453	-3.73385	-37.3385	72.4861	11.5401	8.85258	0.154507	-197.102	0.306224
37.025	6.635	1	1	3	0	0	-3.73176	0.0726972	1.1561	8.8514	-0.19909	17.5442	-3.73176	-37.3176	72.6972	11.561	8.8514	0.154486	-199.09	0.306203
37.035	6.645	1	1	3	0	0	-3.73019	0.0732081	1.15767	8.85485	-0.201121	17.5476	-3.73019	-37.3019	73.2081	11.5767	8.85485	0.154546	-201.121	0.306263
37.046	6.656	1	1	3	0	0	-3.72897	0.072375	1.15889	8.84818	-0.190957	17.5409	-3.72897	-37.2897	72.375	11.5889	8.84818	0.15443	-190.957	0.306147
37.057	6.667	1	1	3	0	0	-3.72671	0.0731212	1.16116	8.85249	-0.203867	17.5452	-3.72671	-37.2671	73.1212	11.6116	8.85249	0.154505	-203.867	0.306222
37.068	6.678	1	1	3	0	0	-3.7245	0.0736045	1.16336	8.85315	-0.194034	17.5459	-3.7245	-37.245	73.6045	11.6336	8.85315	0.154517	-194.034	0.306234
37.081	6.691	1	1	3	0	0	-3.72267	0.0729539	1.16519	8.8537	-0.204204	17.5465	-3.72267	-37.2267	72.9539	11.6519	8.8537	0.154526	-204.204	0.306243
37.092	6.702	1	1	3	0	0	-3.72017	0.0735093	1.16769	8.85487	-0.202731	17.5476	-3.72017	-37.2017	73.5093	11.6769	8.85487	0.154547	-202.731	0.306264
37.102	6.712	1	1	3	0	0	-3.71868	0.0736353	1.16919	8.85241	-0.18681	17.5452	-3.71868	-37.1868	73.6353	11.6919	8.85241	0.154504	-186.81	0.306221
37.113	6.723	1	1	3	0	0	-3.71686	0.0733716	1.171	8.85182	-0.186395	17.5446	-3.71686	-37.1686	73.3716	11.71	8.85182	0.154493	-186.395	0.306211
37.124	6.734	1	1	3	0	0	-3.71531	0.0735443	1.17256	8.85315	-0.19474	17.5459	-3.71531	-37.1531	73.5443	11.7256	8.85315	0.154517	-194.74	0.306234
37.135	6.745	1	1	3	0	0	-3.71319	0.0738066	1.17468	8.85421	-0.189292	17.547	-3.71319	-37.1319	73.8066	11.7468	8.85421	0.154535	-189.292	0.306252
37.145	6.755	1	1	3	0	0	-3.7116	0.0735754	1.17626	8.85642	-0.188371	17.5492	-3.7116	-37.116	73.5754	11.7626	8.85642	0.154574	-188.371	0.306291
37.156	6.766	1	1	3	0	0	-3.70936	0.0740729	1.1785	8.85333	-0.183696	17.5461	-3.70936	-37.0936	74.0729	11.785	8.85333	0.15452	-183.696	0.306237
37.166	6.776	1	1	3	0	0	-3.70803	0.0740829	1.17983	8.8539	-0.196059	17.5467	-3.70803	-37.0803	74.0829	11.7983	8.8539	0.15453	-196.059	0.306247
37.177	6.787	1	1	3	0	0	-3.70595	0.0740068	1.18191	8.85155	-0.197948	17.5443	-3.70595	-37.0595	74.0068	11.8191	8.85155	0.154489	-197.948	0.306206
37.188	6.798	1	1	3	0	0	-3.70434	0.0742296	1.18352	8.8517	-0.202243	17.5445	-3.70434	-37.0434	74.2296	11.8352	8.8517	0.154491	-202.243	0.306209
37.199	6.809	1	1	3	0	0	-3.70271	0.0743992	1.18515	8.85488	-0.201317	17.5476	-3.70271	-37.0271	74.3992	11.8515	8.85488	0.154547	-201.317	0.306264
37.209	6.819	1	1	3	0	0	-3.70112	0.0740821	1.18674	8.85606	-0.197064	17.5488	-3.70112	-37.0112	74.0821	11.8674	8.85606	0.154567	-197.064	0.306285
37.22	6.83	1	1	3	0	0	-3.69932	0.0744094	1.18855	8.84938	-0.192163	17.5421	-3.69932	-36.9932	74.4094	11.8855	8.84938	0.154451	-192.163	0.306168
37.23	6.84	1	1	3	0	0	-3.69734	0.074724	1.19052	8.85534	-0.204661	17.5481	-3.69734	-36.9734	74.724	11.9052	8.85534	0.154555	-204.661	0.306272
37.241	6.851	1	1	3	0	0	-3.69602	0.0742137	1.19184	8.85519	-0.194162	17.5479	-3.69602	-36.9602	74.2137	11.9184	8.85519	0.154552	-194.162	0.306269
37.252	6.862	1	1	3	0	0	-3.69417	0.074682	1.1937	8.85489	-0.189755	17.5476	-3.69417	-36.9417	74.682	11.937	8.85489	0.154547	-189.755	0.306264
37.263	6.873	1	1	3	0	0	-3.6918	0.0751645	1.19606	8.8493	-0.188843	17.5421	-3.6918	-36.918	75.1645	11.9606	8.8493	0.15445	-188.843	0.306167
37.273	6.883	1	1	3	0	0	-3.68996	0.0750785	1.19791	8.85148	-0.191544	17.5442	-3.68996	-36.8996	75.0785	11.9791	8.85148	0.154488	-191.544	0.306205
37.284	6.894	1	1	3	0	0	-3.68862	0.0753031	1.19924	8.85358	-0.203243	17.5463	-3.68862	-36.8862	75.3031	11.9924	8.85358	0.154524	-203.243	0.306241
37.294	6.904	1	1	3	0	0	-3.687	0.0753579	1.20086	8.85349	-0.196076	17.5462	-3.687	-36.87	75.3579	12.0086	8.85349	0.154523	-196.076	0.30624
37.305	6.915	1	1	3	0	0	-3.6848	0.0753484	1.20306	8.85245	-0.189341	17.5452	-3.6848	-36.848	75.3484	12.0306	8.85245	0.154504	-189.341	0.306222
37.316	6.926	1	1	3	0	0	-3.68308	0.0756473	1.20478	8.8532	-0.201871	17.546	-3.68308	-36.8308	75.6473	12.0478	8.8532	0.154518	-201.871	0.306235
37.327	6.937	1	1	3	0	0	-3.68129	0.0759171	1.20657	8.85215	-0.214225	17.5449	-3.68129	-36.8129	75.9171	12.0657	8.85215	0.154499	-214.225	0.306216
37.337	6.947	1	1	3	0	0	-3.67963	0.0753761	1.20823	8.85506	-0.207298	17.5478	-3.67963	-36.7963	75.3761	12.0823	8.85506	0.15455	-207.298	0.306267
37.348	6.958	1	1	3	0	0	-3.67816	0.0756205	1.2097	8.84914	-0.196212	17.5419	-3.67816	-36.7816	75.6205	12.097	8.84914	0.154447	-196.212	0.306164
37.362	6.972	1	1	3	0	0	-3.6755	0.0755856	1.21237	8.85525	-0.200261	17.548	-3.6755	-36.755	75.5856	12.1237	8.85525	0.154553	-200.261	0.30627
37.373	6.983	1	1	3	0	0	-3.67371	0.0758052	1.21415	8.85285	-0.202286	17.5456	-3.67371	-36.7371	75.8052	12.1415	8.85285	0.154511	-202.286	0.306228
37.383	6.993	1	1	3	0	0	-3.672	0.0761532	1.21586	8.85217	-0.204962	17.5449	-3.672	-36.72	76.1532	12.1586	8.85217	0.1545	-204.962	0.306217
37.394	7.004	1	1	3	0	0	-3.67005	0.0758777	1.21782	8.85357	-0.207925	17.5463	-3.67005	-36.7005	75.8777	12.1782	8.85357	0.154524	-207.925	0.306241
37.404	7.014	1	1	3	0	0	-3.6689	0.0758195	1.21897	8.85103	-0.186325	17.5438	-3.6689	-36.689	75.8195	12.1897	8.85103	0.15448	-186.325	0.306197
37.415	7.025	1	1	3	0	0	-3.66706	0.0762768	1.2208	8.84925	-0.196631	17.542	-3.66706	-36.6706	76.2768	12.208	8.84925	0.154449	-196.631	0.306166
37.425	7.035	1	1	3	0	0	-3.66534	0.0759841	1.22252	8.85539	-0.192217	17.5481	-3.66534	-36.6534	75.9841	12.2252	8.85539	0.154556	-192.217	0.306273
37.436	7.046	1	1	3	0	0	-3.66309	0.0763816	1.22477	8.85359	-0.182331	17.5463	-3.66309	-36.6309	76.3816	12.2477	8.85359	0.154524	-182.331	0.306242
37.447	7.057	1	1	3	0	0	-3.66158	0.0766843	1.22628	8.85317	-0.187459	17.5459	-3.66158	-36.6158	76.6843	12.2628	8.85317	0.154517	-187.459	0.306234
37.458	7.068	1	1	3	0	0	-3.65939	0.0762834	1.22848	8.84984	-0.191469	17.5426	-3.65939	-36.5939	76.2834	12.2848	8.84984	0.154459	-191.469	0.306176
37.468	7.078	1	1	3	0	0	-3.65804	0.0765229	1.22982	8.85318	-0.186042	17.5459	-3.65804	-36.5804	76.5229	12.2982	8.85318	0.154517	-186.042	0.306234
37.479	7.089	1	1	3	0	0	-3.65565	0.0768666	1.23222	8.85556	-0.195349	17.5483	-3.65565	-36.5565	76.8666	12.3222	8.85556	0.154559	-195.349	0.306276
37.489	7.099	1	1	3	0	0	-3.65426	0.0766732	1.23361	8.85612	-0.177789	17.5489	-3.65426	-36.5426	76.6732	12.3361	8.85612	0.154569	-177.789	0.306286
37.5	7.11	1	1	3	0	0	-3.65216	0.0769665	1.2357	8.84832	-0.188663	17.5411	-3.65216	-36.5216	76.9665	12.357	8.84832	0.154432	-188.663	0.306149
37.511	7.121	1	1	3	0	0	-3.65044	0.0770575	1.23742	8.85382	-0.201577	17.5466	-3.65044	-36.5044	77.0575	12.3742	8.85382	0.154528	-201.577	0.306245
37.522	7.132	1	1	3	0	0	-3.64891	0.0766462	1.23895	8.85391	-0.203173	17.5467	-3.64891	-36.4891	76.6462	12.3895	8.85391	0.15453	-203.173	0.306247
37.532	7.142	1	1	3	0	0	-3.64738	0.0770312	1.24049	8.8514	-0.191221	17.5442	-3.64738	-36.4738	77.0312	12.4049	8.8514	0.154486	-191.221	0.306203
37.543	7.153	1	1	3	0	0	-3.64569	0.0771027	1.24217	8.85465	-0.210783	17.5474	-3.64569	-36.4569	77.1027	12.4217	8.85465	0.154543	-210.783	0.30626
37.554	7.164	1	1	3	0	0	-3.64346	0.0770069	1.24441	8.85223	-0.205342	17.545	-3.64346	-36.4346	77.0069	12.4441	8.85223	0.154501	-205.342	0.306218
37.568	7.178	1	1	3	0	0	-3.64111	0.077161	1.24675	8.85326	-0.196457	17.546	-3.64111	-36.4111	77.161	12.4675	8.85326	0.154519	-196.457	0.306236
37.578	7.188	1	1	3	0	0	-3.63941	0.0773349	1.24846	8.85293	-0.188813	17.5457	-3.63941	-36.3941	77.3349	12.4846	8.85293	0.154513	-188.813	0.30623
37.589	7.199	1	1	3	0	0	-3.63762	0.0771849	1.25025	8.85274	-0.196887	17.5455	-3.63762	-36.3762	77.1849	12.5025	8.85274	0.15451	-196.887	0.306227
37.599	7.209	1	1	3	0	0	-3.63591	0.0772887	1.25195	8.85574	-0.200418	17.5485	-3.63591	-36.3591	77.2887	12.5195	8.85574	0.154562	-200.418	0.306279
37.61	7.22	1	1	3	0	0	-3.634	0.0776563	1.25386	8.85218	-0.196064	17.5449	-3.634	-36.34	77.6563	12.5386	8.85218	0.1545	-196.064	0.306217
37.623	7.233	1	1	3	0	0	-3.63189	0.0770551	1.25597	8.85456	-0.187411	17.5473	-3.63189	-36.3189	77.0551	12.5597	8.85456	0.154541	-187.411	0.306258
37.633	7.243	1	1	3	0	0	-3.62994	0.0774753	1.25792	8.85202	-0.189037	17.5448	-3.62994	-36.2994	77.4753	12.5792	8.85202	0.154497	-189.037	0.306214
37.644	7.254	1	1	3	0	0	-3.62865	0.0775585	1.25921	8.85414	-0.187067	17.5469	-3.62865	-36.2865	77.5585	12.5921	8.85414	0.154534	-187.067	0.306251
37.654	7.264	1	1	3	0	0	-3.62669	0.0776454	1.26117	8.85441	-0.186911	17.5472	-3.62669	-36.2669	77.6454	12.6117	8.85441	0.154539	-186.911	0.306256
37.665	7.275	1	1	3	0	0	-3.62448	0.077813	1.26338	8.85407	-0.181285	17.5468	-3.62448	-36.2448	77.813	12.6338	8.85407	0.154533	-181.285	0.30625
37.675	7.285	1	1	3	0	0	-3.62318	0.077752	1.26468	8.85029	-0.19198	17.5431	-3.62318	-36.2318	77.752	12.6468	8.85029	0.154467	-191.98	0.306184
37.686	7.296	1	1	3	0	0	-3.62128	0.077657	1.26658	8.85197	-0.192918	17.5447	-3.62128	-36.2128	77.657	12.6658	8.85197	0.154496	-192.918	0.306213
37.697	7.307	1	1	3	0	0	-3.61883	0.0781134	1.26903	8.85051	-0.189083	17.5433	-3.61883	-36.1883	78.1134	12.6903	8.85051	0.154471	-189.083	0.306188
37.708	7.318	1	1	3	0	0	-3.61715	0.0783448	1.27071	8.85412	-0.183678	17.5469	-3.61715	-36.1715	78.3448	12.7071	8.85412	0.154534	-183.678	0.306251
37.718	7.328	1	1	3	0	0	-3.61537	0.0776595	1.27249	8.85104	-0.189676	17.5438	-3.61537	-36.1537	77.6595	12.7249	8.85104	0.15448	-189.676	0.306197
37.729	7.339	1	1	3	0	0	-3.61383	0.0778661	1.27403	8.85411	-0.192398	17.5469	-3.61383	-36.1383	77.8661	12.7403	8.85411	0.154533	-192.398	0.306251
37.739	7.349	1	1	3	0	0	-3.6115	0.0785385	1.27637	8.85403	-0.192463	17.5468	-3.6115	-36.115	78.5385	12.7637	8.85403	0.154532	-192.463	0.306249
37.75	7.36	1	1	3	0	0	-3.60942	0.0782979	1.27844	8.85592	-0.195108	17.5487	-3.60942	-36.0942	78.2979	12.7844	8.85592	0.154565	-195.108	0.306282
37.761	7.371	1	1	3	0	0	-3.60801	0.0780103	1.27986	8.8531	-0.183164	17.5459	-3.60801	-36.0801	78.0103	12.7986	8.8531	0.154516	-183.164	0.306233
37.772	7.382	1	1	3	0	0	-3.60617	0.0784844	1.28169	8.85184	-0.180026	17.5446	-3.60617	-36.0617	78.4844	12.8169	8.85184	0.154494	-180.026	0.306211
37.782	7.392	1	1	3	0	0	-3.60418	0.0782684	1.28369	8.85541	-0.190961	17.5482	-3.60418	-36.0418	78.2684	12.8369	8.85541	0.154556	-190.961	0.306273
37.793	7.403	1	1	3	0	0	-3.60239	0.0785362	1.28548	8.84959	-0.181794	17.5423	-3.60239	-36.0239	78.5362	12.8548	8.84959	0.154455	-181.794	0.306172
37.804	7.414	1	1	3	0	0	-3.60067	0.0783406	1.28719	8.85284	-0.179106	17.5456	-3.60067	-36.0067	78.3406	12.8719	8.85284	0.154511	-179.106	0.306228
37.815	7.425	1	1	3	0	0	-3.59877	0.0782388	1.28909	8.8557	-0.182163	17.5485	-3.59877	-35.9877	78.2388	12.8909	8.8557	0.154561	-182.163	0.306278
37.825	7.435	1	1	3	0	0	-3.59724	0.0783442	1.29063	8.85462	-0.200454	17.5474	-3.59724	-35.9724	78.3442	12.9063	8.85462	0.154542	-200.454	0.306259
37.836	7.446	1	1	3	0	0	-3.59456	0.0787633	1.29331	8.85175	-0.1948	17.5445	-3.59456	-35.9456	78.7633	12.9331	8.85175	0.154492	-194.8	0.306209
37.837	7.447	1	1	3	0	0	-3.59435	0.0787953	1.29352	8.85134	-0.201649	17.5441	-3.59435	-35.9435	78.7953	12.9352	8.85134	0.154485	-201.649	0.306202
37.838	7.448	1	1	3	0	0	-3.59416	0.0787102	1.2937	8.85151	-0.199093	17.5443	-3.59416	-35.9416	78.7102	12.937	8.85151	0.154488	-199.093	0.306205
37.849	7.459	1	1	3	0	0	-3.59276	0.0782333	1.2951	8.852	-0.187913	17.5448	-3.59276	-35.9276	78.2333	12.951	8.852	0.154497	-187.913	0.306214
37.86	7.47	1	1	3	0	0	-3.59109	0.0784474	1.29677	8.85069	-0.192892	17.5434	-3.59109	-35.9109	78.4474	12.9677	8.85069	0.154474	-192.892	0.306191
37.871	7.481	1	1	3	0	0	-3.58865	0.0783452	1.29921	8.85505	-0.19141	17.5478	-3.58865	-35.8865	78.3452	12.9921	8.85505	0.15455	-191.41	0.306267
37.882	7.492	1	1	3	0	0	-3.58632	0.0783393	1.30155	8.85344	-0.205883	17.5462	-3.58632	-35.8632	78.3393	13.0155	8.85344	0.154522	-205.883	0.306239
37.892	7.502	1	1	3	0	0	-3.58483	0.0783075	1.30303	8.84879	-0.18816	17.5415	-3.58483	-35.8483	78.3075	13.0303	8.84879	0.154441	-188.16	0.306158
37.903	7.513	1	1	3	0	0	-3.58322	0.077838	1.30464	8.85399	-0.193482	17.5467	-3.58322	-35.8322	77.838	13.0464	8.85399	0.154531	-193.482	0.306248
37.913	7.523	1	1	3	0	0	-3.58114	0.0778584	1.30672	8.85223	-0.183678	17.545	-3.58114	-35.8114	77.8584	13.0672	8.85223	0.154501	-183.678	0.306218
37.924	7.534	1	1	3	0	0	-3.57939	0.078113	1.30847	8.85108	-0.184413	17.5438	-3.57939	-35.7939	78.113	13.0847	8.85108	0.15448	-184.413	0.306198
37.935	7.545	1	1	3	0	0	-3.57738	0.0777268	1.31049	8.85562	-0.200076	17.5484	-3.57738	-35.7738	77.7268	13.1049	8.85562	0.15456	-200.076	0.306277
37.936	7.546	1	1	3	0	0	-3.57717	0.0776697	1.31069	8.85482	-0.227291	17.5476	-3.57717	-35.7717	77.6697	13.1069	8.85482	0.154546	-227.291	0.306263
37.947	7.557	1	1	3	0	0	-3.57478	0.0779206	1.31308	8.85399	-0.209881	17.5467	-3.57478	-35.7478	77.9206	13.1308	8.85399	0.154531	-209.881	0.306248
37.958	7.568	1	1	3	0	0	-3.5729	0.0780205	1.31496	8.85286	-0.205649	17.5456	-3.5729	-35.729	78.0205	13.1496	8.85286	0.154512	-205.649	0.306229
37.968	7.578	1	1	3	0	0	-3.57142	0.077525	1.31644	8.8536	-0.21287	17.5464	-3.57142	-35.7142	77.525	13.1644	8.8536	0.154525	-212.87	0.306242
37.979	7.589	1	1	3	0	0	-3.56963	0.077729	1.31823	8.85123	-0.209903	17.544	-3.56963	-35.6963	77.729	13.1823	8.85123	0.154483	-209.903	0.3062
[truncated: 7,751 more rows]

## Sheet: Data sheet 3
Gesamtzeit (s)	Verstrichene Zykluszeit (s)	Gesamtzyklen	Verstrichene Zyklen	Schritt	Gesamtzyklenzahl(E10BMTL8633 (Linear) Wellenform)	Gesamtzyklenzahl(E10BMTL8633 (Rotary) Wellenform)	Position des Aktuators(E10BMTL8633 (Linear):Position) (mm)	Last(E10BMTL8633 (Linear):Kraft) (kN)	Verschiebung(E10BMTL8633 (Linear):Digitale Position) (mm)	Umdrehung(E10BMTL8633 (Rotary):Umdrehung) (deg)	Drehmoment(E10BMTL8633 (Rotary):Drehmoment) (N·m)	Verschiebung (Rotation)(E10BMTL8633 (Rotary):Digitale Umdrehung) (deg)	Verschiebung(E10BMTL8633 (Linear):Position) (mm)	Dehnung(E10BMTL8633 (Linear):Position) (%)	Spannung(E10BMTL8633 (Linear):Kraft) (MPa)	Dehnung(E10BMTL8633 (Linear):Digitale Position) (%)	Verschiebung (Rotation)(E10BMTL8633 (Rotary):Umdrehung) (deg)	Scherdehnung(E10BMTL8633 (Rotary):Umdrehung) (rad)	Scherspannung(E10BMTL8633 (Rotary):Drehmoment) (MPa)	Scherdehnung(E10BMTL8633 (Rotary):Digitale Umdrehung) (rad)
[truncated: 8,441 more rows]

[truncated: 33 more sheets: Data sheet 4, Data sheet 5, Data sheet 6, Data sheet 7, Data sheet 8, Data sheet 9, Data sheet 10, Data sheet 11, Data sheet 12, Data sheet 13, Data sheet 14, Data sheet 15, Data sheet 16, Data sheet 17, Data sheet 18, Data sheet 19, Data sheet 20, Data sheet 21, Data sheet 22, Data sheet 23 …]
